# Supplementary material for: Tectonic exhumation of the Central Alps recorded by detrital zircon in the Molasse Basin, Switzerland
Source: Copernicus journal article supplement (doi:10.5194/se-11-2197-2020), 2020-11-23
Supplement: Supplementary file 1 [file se-11-2197-2020-supplement.zip]

Archive with 3 entries (3 files):
- Table S2.pdf
- Table S1.pdf
- se-11-2197-2020-supplement-title-page.pdf
