# Supplementary material for: Tectonic exhumation of the Central Alps recorded by detrital zircon in the Molasse Basin, Switzerland
Source: Copernicus journal article supplement (doi:10.5194/se-11-2197-2020), 2020-11-23
Supplement: Supplementary file 1 [file se-11-2197-2020-supplement.zip › se-11-2197-2020-supplement-title-page.pdf]

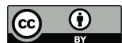

## *Supplement of*

# **Tectonic exhumation of the Central Alps recorded by detrital zircon in the Molasse Basin, Switzerland**

**Owen A. Anfinson et al.**

*Correspondence to:* Owen A. Anfinson ([anfinson@sonoma.edu](mailto:anfinson@sonoma.edu))

- [se-11-2197-2020-supplement-title-page.pdf](#)
- [Table S1.pdf](#)
- [Table S2.pdf](#)

The copyright of individual parts of the supplement might differ from the CC BY 4.0 License.
