# Supplementary material for: Tectonic exhumation of the Central Alps recorded by detrital zircon in the Molasse Basin, Switzerland
Source: Copernicus journal article supplement (doi:10.5194/se-11-2197-2020), 2020-11-23
Supplement: Supplementary file 1 [file se-11-2197-2020-supplement.zip › Table S1.pdf]

# Lucerne Section

| Sample Name:                           | 09-SFB-38 |       | Isotopic Ratios |          |             |          |       | Apparent Ages (Ma) |          |           |          |            |          |          |          |              |              |
|----------------------------------------|-----------|-------|-----------------|----------|-------------|----------|-------|--------------------|----------|-----------|----------|------------|----------|----------|----------|--------------|--------------|
| Upper Freshwater Molasse (13.5 ± 1 Ma) |           |       |                 |          |             |          |       |                    |          |           |          |            |          |          |          |              |              |
| Grain #                                | U (ppm)   | U/Th  | 207Pb           | 2σ error | 206Pb       | 2σ error | Error | 207Pb              | 2σ error | 206Pb     | 2σ error | 207Pb      | 2σ error | Best age | 2σ error | Discordance* | Rim, Core or |
|                                        |           |       | 235U (abs.)     |          | 238U (abs.) |          | Corr. | 235U (Ma)          |          | 238U (Ma) |          | 206Pb (Ma) |          | (Ma)     |          | %            | Single Age   |
| SFB38_1                                | 338.00    | 1.35  | 0.3294          | 0.0045   | 0.04616     | 0.00067  | 0.481 | 289                | 3.5      | 290.9     | 4.1      | 282        | 30       | 290.9    | 4.1      | 0.7          | Single Age   |
| SFB38_2                                | 216.00    | 1.85  | 0.5742          | 0.0055   | 0.07494     | 0.00063  | 0.644 | 461                | 3.6      | 465.8     | 3.8      | 446        | 18       | 465.8    | 3.8      | 1.0          | Single Age   |
| SFB38_3                                | 231.00    | 1.80  | 0.3588          | 0.0062   | 0.04823     | 0.00083  | 0.525 | 311.1              | 4.6      | 303.6     | 5.1      | 354        | 40       | 303.6    | 5.1      | 2.4          | Single Age   |
| SFB38_4                                | 649.00    | 3.11  | 0.3869          | 0.0039   | 0.05284     | 0.00051  | 0.459 | 332.1              | 2.8      | 332       | 3.1      | 332        | 23       | 332.0    | 3.1      | 0.0          | Single Age   |
| SFB38_5                                | 175.80    | 4.77  | 0.5541          | 0.0060   | 0.07255     | 0.00058  | 0.492 | 447.5              | 3.9      | 451.5     | 3.5      | 447        | 21       | 451.5    | 3.5      | 0.9          | Single Age   |
| SFB38_6                                | 31.10     | 59.80 | 0.3870          | 0.0230   | 0.05240     | 0.00200  | 0.737 | 331                | 17       | 329       | 12       | 410        | 100      | 329.0    | 12.0     | 0.6          | Rim          |
| SFB38_6                                | 62.50     | 10.92 | 0.5940          | 0.0150   | 0.07760     | 0.00210  | 0.429 | 475                | 10       | 482       | 13       | 459        | 65       | 482.0    | 13.0     | 1.5          | Core         |
| SFB38_7                                | 484.00    | 4.30  | 0.3810          | 0.0150   | 0.05240     | 0.00220  | 0.874 | 331                | 12       | 329       | 13       | 372        | 32       | 329.0    | 13.0     | 0.6          | Rim          |
| SFB38_7                                | 247.00    | 1.69  | 0.6100          | 0.0130   | 0.07760     | 0.00180  | 0.806 | 483                | 8        | 482       | 11       | 483        | 34       | 482.0    | 11.0     | 0.2          | Core         |
| SFB38_8                                | 273.60    | 0.72  | 0.3189          | 0.0040   | 0.04497     | 0.00041  | 0.377 | 280.9              | 3.1      | 283.5     | 2.5      | 267        | 29       | 283.5    | 2.5      | 0.9          | Single Age   |
| SFB38_9                                | 450.00    | 1.78  | 0.6471          | 0.0054   | 0.08109     | 0.00076  | 0.479 | 506.6              | 3.4      | 502.6     | 4.6      | 531        | 20       | 502.6    | 4.6      | 0.8          | Single Age   |
| SFB38_11                               | 614.00    | 7.44  | 0.5211          | 0.0082   | 0.06740     | 0.00120  | 0.799 | 425.5              | 5.5      | 420.2     | 7.3      | 436        | 23       | 420.2    | 7.3      | 1.2          | Single Age   |
| SFB38_12                               | 151.00    | 1.26  | 0.3613          | 0.0069   | 0.04873     | 0.00083  | 0.605 | 313.4              | 5        | 306.7     | 5.1      | 355        | 36       | 306.7    | 5.1      | 2.1          | Single Age   |
| SFB38_13                               | 459.20    | 3.16  | 0.3134          | 0.0024   | 0.04391     | 0.00033  | 0.313 | 276.8              | 1.8      | 277       | 2        | 277        | 20       | 277.0    | 2.0      | 0.1          | Single Age   |
| SFB38_14                               | 82.10     | 1.92  | 0.3014          | 0.0073   | 0.04193     | 0.00060  | 0.218 | 267.3              | 5.7      | 264.8     | 3.7      | 276        | 66       | 264.8    | 3.7      | 0.9          | Single Age   |
| SFB38_15                               | 132.40    | 1.29  | 0.3942          | 0.0047   | 0.05339     | 0.00051  | 0.258 | 337.3              | 3.4      | 335.3     | 3.1      | 338        | 33       | 335.3    | 3.1      | 0.6          | Single Age   |
| SFB38_17                               | 150.30    | 4.01  | 0.6529          | 0.0059   | 0.08224     | 0.00068  | 0.497 | 510.1              | 3.6      | 509.4     | 4        | 522        | 19       | 509.4    | 4.0      | 0.1          | Single Age   |
| SFB38_18                               | 607.00    | 1.98  | 0.5633          | 0.0092   | 0.07000     | 0.00110  | 0.541 | 453.3              | 5.9      | 436.1     | 6.9      | 522        | 31       | 436.1    | 6.9      | 3.8          | Single Age   |
| SFB38_19                               | 203.50    | 2.09  | 0.5557          | 0.0091   | 0.07220     | 0.00120  | 0.607 | 450                | 6        | 449.5     | 7        | 458        | 33       | 449.5    | 7.0      | 0.1          | Single Age   |
| SFB38_20                               | 459.00    | 1.69  | 0.3900          | 0.0041   | 0.05291     | 0.00071  | 0.593 | 334.3              | 3        | 332.3     | 4.3      | 354        | 24       | 332.3    | 4.3      | 0.6          | Single Age   |
| SFB38_21                               | 171.00    | 3.41  | 0.5446          | 0.0092   | 0.06960     | 0.00074  | 0.368 | 441.1              | 6        | 433.7     | 4.4      | 485        | 35       | 433.7    | 4.4      | 1.7          | Single Age   |
| SFB38_22                               | 174.00    | 1.47  | 0.3296          | 0.0074   | 0.04600     | 0.00110  | 0.476 | 288.9              | 5.6      | 289.6     | 6.7      | 282        | 54       | 289.6    | 6.7      | 0.2          | Single Age   |
| SFB38_23                               | 228.40    | 4.01  | 0.7140          | 0.0130   | 0.08367     | 0.00069  | 0.565 | 546.7              | 7.3      | 518       | 4.1      | 667        | 30       | 518.0    | 4.1      | 5.2          | Single Age   |
| SFB38_24                               | 241.60    | 4.89  | 0.7330          | 0.0180   | 0.08660     | 0.00130  | 0.454 | 557                | 11       | 535.6     | 7.7      | 631        | 42       | 535.6    | 7.7      | 3.8          | Single Age   |
| SFB38_25                               | 938.00    | 2.90  | 0.2399          | 0.0041   | 0.03329     | 0.00046  | 0.429 | 218.3              | 3.4      | 211.1     | 2.9      | 289        | 38       | 211.1    | 2.9      | 3.3          | Rim          |
| SFB38_25                               | 305.00    | 1.40  | 0.3289          | 0.0051   | 0.04380     | 0.00056  | 0.382 | 288.6              | 3.9      | 276.3     | 3.5      | 373        | 35       | 276.3    | 3.5      | 4.3          | Core         |
| SFB38_26                               | 415.00    | 5.60  | 0.5596          | 0.0050   | 0.07182     | 0.00047  | 0.158 | 451.1              | 3.2      | 447.1     | 2.8      | 470        | 18       | 447.1    | 2.8      | 0.9          | Single Age   |
| SFB38_27                               | 357.00    | 3.93  | 0.2853          | 0.0035   | 0.03982     | 0.00039  | 0.065 | 254.8              | 2.8      | 251.7     | 2.4      | 281        | 29       | 251.7    | 2.4      | 1.2          | Single Age   |
| SFB38_28                               | 2100.00   | 10.42 | 0.7193          | 0.0050   | 0.08543     | 0.00061  | 0.726 | 550.2              | 2.9      | 528.4     | 3.6      | 650        | 10       | 528.4    | 3.6      | 4.0          | Single Age   |
| SFB38_29                               | 360.70    | 13.00 | 0.5490          | 0.0110   | 0.06850     | 0.00150  | 0.714 | 443.8              | 7        | 428.3     | 9        | 536        | 41       | 428.3    | 9.0      | 3.5          | Rim          |
| SFB38_29                               | 86.00     | 1.93  | 0.9030          | 0.0240   | 0.10130     | 0.00270  | 0.412 | 653                | 13       | 622       | 16       | 763        | 55       | 622.0    | 16.0     | 4.7          | Core         |
| SFB38_30                               | 290.00    | 2.70  | 0.2944          | 0.0040   | 0.04175     | 0.00050  | 0.174 | 261.9              | 3.1      | 263.6     | 3.1      | 254        | 39       | 263.6    | 3.1      | 0.6          | Single Age   |
| SFB38_31                               | 380.30    | 1.94  | 0.3251          | 0.0058   | 0.04474     | 0.00061  | 0.317 | 285.6              | 4.5      | 282.1     | 3.8      | 305        | 34       | 282.1    | 3.8      | 1.2          | Single Age   |
| SFB38_32                               | 524.00    | 2.04  | 0.4202          | 0.0039   | 0.05672     | 0.00048  | 0.489 | 356.1              | 2.8      | 355.6     | 2.9      | 359        | 20       | 355.6    | 2.9      | 0.1          | Single Age   |
| SFB38_33                               | 327.50    | 1.33  | 0.3272          | 0.0047   | 0.04526     | 0.00052  | 0.134 | 287.3              | 3.6      | 285.3     | 3.2      | 313        | 40       | 285.3    | 3.2      | 0.7          | Single Age   |
| SFB38_35                               | 255.00    | 2.23  | 0.6760          | 0.0120   | 0.08065     | 0.00091  | 0.431 | 524                | 7.1      | 500       | 5.4      | 638        | 31       | 500.0    | 5.4      | 4.6          | Single Age   |
| SFB38_36                               | 374.00    | 1.27  | 0.3680          | 0.0160   | 0.04285     | 0.00078  | 0.125 | 317                | 12       | 270.4     | 4.8      | 660        | 100      | DISC     | DISC     | 14.7         | Single Age   |
| SFB38_37                               | 168.60    | 1.22  | 1.5790          | 0.0180   | 1.5680      | 0.00150  | 0.528 | 961.4              | 7.1      | 939       | 8.5      | 1015       | 22       | 1015.0   | 22.0     | 7.5          | Single Age   |
| SFB38_38                               | 165.20    | 2.93  | 0.3248          | 0.0053   | 0.04515     | 0.00039  | 0.012 | 285.4              | 4        | 284.6     | 2.4      | 292        | 36       | 284.6    | 2.4      | 0.3          | Single Age   |
| SFB38_40                               | 51.60     | 1.18  | 11.6800         | 0.1400   | 0.47550     | 0.00530  | 0.690 | 2579               | 11       | 2507      | 23       | 2638       | 17       | 2638.0   | 17.0     | 5.0          | Single Age   |
| SFB38_41                               | 195.00    | 1.45  | 0.3445          | 0.0046   | 0.04790     | 0.00050  | 0.492 | 300.4              | 3.5      | 301.6     | 3.1      | 270        | 29       | 301.6    | 3.1      | 0.4          | Single Age   |
| SFB38_42                               | 105.80    | 1.37  | 0.8660          | 0.0170   | 0.09700     | 0.00180  | 0.482 | 632.6              | 9.1      | 596       | 11       | 742        | 43       | 596.0    | 11.0     | 5.8          | Single Age   |
| SFB38_43                               | 982.00    | 1.81  | 0.3280          | 0.0052   | 0.04547     | 0.00074  | 0.766 | 287.9              | 3.9      | 286.6     | 4.5      | 306        | 26       | 286.6    | 4.5      | 0.5          | Single Age   |
| SFB38_44                               | 506.00    | 1.38  | 0.3889          | 0.0037   | 0.05290     | 0.00037  | 0.514 | 333.5              | 2.7      | 332.3     | 2.3      | 336        | 18       | 332.3    | 2.3      | 0.4          | Single Age   |
| SFB38_45                               | 336.00    | 10.79 | 0.4410          | 0.0170   | 0.05780     | 0.00170  | 0.344 | 371                | 12       | 362       | 10       | 438        | 72       | 362.0    | 10.0     | 2.4          | Rim          |
| SFB38_45                               | 88.00     | 1.16  | 1.1440          | 0.0180   | 1.12600     | 0.00220  | 0.467 | 773.9              | 8.5      | 765       | 12       | 806        | 37       | 765.0    | 12.0     | 1.2          | Core         |
| SFB38_47                               | 104.80    | 1.06  | 0.3421          | 0.0047   | 0.04738     | 0.00049  | 0.123 | 298.6              | 3.5      | 298.4     | 3        | 298        | 37       | 298.4    | 3.0      | 0.1          | Single Age   |
| SFB38_48                               | 446.00    | 1.93  | 0.3390          | 0.0027   | 0.04684     | 0.00027  | 0.435 | 296.3              | 2.1      | 295.1     | 1.7      | 313        | 17       | 295.1    | 1.7      | 0.4          | Single Age   |
| SFB38_49                               | 1610.00   | 2.15  | 0.3150          | 0.0039   | 0.04343     | 0.00052  | 0.759 | 277.9              | 3        | 274       | 3.2      | 307        | 20       | 274.0    | 3.2      | 1.4          | Single Age   |
| SFB38_51                               | 228.00    | 1.10  | 0.4106          | 0.0063   | 0.05579     | 0.00059  | 0.433 | 349.2              | 4.5      | 350       | 3.6      | 321        | 33       | 350.0    | 3.6      | 0.2          | Single Age   |
| SFB38_52                               | 198.00    | 2.44  | 0.3678          | 0.0042   | 0.05069     | 0.00045  | 0.112 | 317.9              | 3.1      | 319.1     | 2.8      | 313        | 33       | 319.1    | 2.8      | 0.4          | Single Age   |
| SFB38_53                               | 447.00    | 1.85  | 0.7820          | 0.0100   | 0.09500     | 0.00130  | 0.702 | 586.5              | 5.9      | 584.8     | 7.6      | 594        | 21       | 584.8    | 7.6      | 0.3          | Rim          |
| SFB38_53                               | 137.30    | 1.16  | 0.8600          | 0.0150   | 1.02500     | 0.00110  | 0.440 | 629.5              | 7.9      | 628.7     | 6.7      | 625        | 34       | 628.7    | 6.7      | 0.1          | Core         |
| SFB38_54                               | 226.60    | 2.30  | 0.3379          | 0.0039   | 0.04659     | 0.00034  | 0.195 | 295.8              | 2.9      | 293.5     | 2.1      | 309        | 27       | 293.5    | 2.1      | 0.8          | Single Age   |
| SFB38_55                               | 512.00    | 0.79  | 0.3344          | 0.0033   | 0.04606     | 0.00038  | 0.639 | 292.8              | 2.5      | 290.3     | 2.4      | 313        | 18       | 290.3    | 2.4      | 0.9          | Single Age   |
| SFB38_56                               | 72.10     | 1.26  | 0.3523          | 0.0064   | 0.04815     | 0.00048  | 0.169 | 306.1              | 4.8      | 303.5     | 2.9      | 323        | 42       | 303.5    | 2.9      | 0.8          | Single Age   |
| SFB38_57                               | 95.40     | 1.98  | 6.7000          | 0.3900   | 0.29880     | 0.00820  | 0.772 | 2065               | 49       | 1685      | 41       | 2453       | 64       | DISC     |          |              |              |

|           |         |        |        |        |         |         |       |       |     |       |     |     |    |       |     |     |            |
|-----------|---------|--------|--------|--------|---------|---------|-------|-------|-----|-------|-----|-----|----|-------|-----|-----|------------|
| SFB38_102 | 196.00  | 5.40   | 0.6040 | 0.0130 | 0.07750 | 0.00100 | 0.408 | 479.4 | 8.1 | 481.3 | 6.2 | 475 | 43 | 481.3 | 6.2 | 0.4 | Single Age |
| SFB38_103 | 396.80  | 1.85   | 0.3195 | 0.0036 | 0.04451 | 0.00041 | 0.372 | 281.4 | 2.8 | 280.7 | 2.5 | 292 | 24 | 280.7 | 2.5 | 0.2 | Single Age |
| SFB38_104 | 190.00  | 4.48   | 0.5550 | 0.0100 | 0.07100 | 0.00130 | 0.626 | 448.3 | 6.6 | 442.1 | 7.9 | 504 | 38 | 442.1 | 7.9 | 1.4 | Single Age |
| SFB38_105 | 251.00  | 4.56   | 0.6691 | 0.0061 | 0.08297 | 0.00067 | 0.349 | 520.4 | 3.8 | 513.8 | 4   | 550 | 22 | 513.8 | 4.0 | 1.3 | Single Age |
| SFB38_106 | 241.00  | 6.80   | 0.5620 | 0.0100 | 0.07266 | 0.00084 | 0.029 | 452.3 | 6.7 | 452.1 | 5   | 462 | 39 | 452.1 | 5.0 | 0.0 | Single Age |
| SFB38_108 | 110.40  | 3.18   | 0.5563 | 0.0091 | 0.07120 | 0.00075 | 0.045 | 448.7 | 5.9 | 443.4 | 4.5 | 475 | 35 | 443.4 | 4.5 | 1.2 | Single Age |
| SFB38_109 | 307.00  | 0.70   | 0.3208 | 0.0046 | 0.04412 | 0.00043 | 0.130 | 282.4 | 3.5 | 278.3 | 2.7 | 311 | 34 | 278.3 | 2.7 | 1.5 | Single Age |
| SFB38_110 | 753.00  | 3.30   | 0.3252 | 0.0033 | 0.04465 | 0.00039 | 0.504 | 285.8 | 2.5 | 281.6 | 2.4 | 315 | 18 | 281.6 | 2.4 | 1.5 | Single Age |
| SFB38_111 | 156.00  | 4.72   | 0.5674 | 0.0071 | 0.07283 | 0.00087 | 0.201 | 456.2 | 4.6 | 453.1 | 5.2 | 506 | 33 | 453.1 | 5.2 | 0.7 | Single Age |
| SFB38_112 | 603.00  | 1.40   | 0.3205 | 0.0030 | 0.04426 | 0.00029 | 0.487 | 282.8 | 2.2 | 279.2 | 1.8 | 333 | 19 | 279.2 | 1.8 | 1.3 | Single Age |
| SFB38_113 | 209.40  | 4.68   | 0.5872 | 0.0076 | 0.07491 | 0.00065 | 0.173 | 468.9 | 4.8 | 465.6 | 3.9 | 495 | 30 | 465.6 | 3.9 | 0.7 | Single Age |
| SFB38_114 | 693.00  | 1.26   | 0.3197 | 0.0023 | 0.04449 | 0.00026 | 0.338 | 281.7 | 1.8 | 280.6 | 1.6 | 300 | 18 | 280.6 | 1.6 | 0.4 | Single Age |
| SFB38_115 | 465.00  | 4.90   | 0.5469 | 0.0089 | 0.06940 | 0.00110 | 0.354 | 442.8 | 5.8 | 432.7 | 6.6 | 519 | 39 | 432.7 | 6.6 | 2.3 | Rim        |
| SFB38_115 | 492.70  | 1.04   | 0.6920 | 0.0084 | 0.08578 | 0.00097 | 0.452 | 533.9 | 5   | 530.5 | 5.8 | 571 | 26 | 530.5 | 5.8 | 0.6 | Core       |
| SFB38_116 | 568.00  | 4.08   | 0.3283 | 0.0083 | 0.04570 | 0.00100 | 0.828 | 288.2 | 6.4 | 287.8 | 6.4 | 306 | 51 | 287.8 | 6.4 | 0.1 | Rim        |
| SFB38_116 | 90.80   | 0.37   | 0.7960 | 0.0110 | 0.09620 | 0.00120 | 0.245 | 594.5 | 6.1 | 591.8 | 7.2 | 601 | 37 | 591.8 | 7.2 | 0.5 | Core       |
| SFB38_117 | 180.20  | 1.33   | 0.9540 | 0.0160 | 0.11076 | 0.00082 | 0.426 | 677.3 | 6.5 | 677.1 | 4.7 | 698 | 30 | 677.1 | 4.7 | 0.0 | Single Age |
| SFB38_118 | 245.70  | 2.40   | 0.3384 | 0.0040 | 0.04722 | 0.00039 | 0.308 | 295.8 | 3.1 | 297.4 | 2.4 | 297 | 26 | 297.4 | 2.4 | 0.5 | Single Age |
| SFB38_119 | 422.90  | 6.57   | 0.5436 | 0.0061 | 0.07016 | 0.00058 | 0.217 | 440.7 | 4   | 437.1 | 3.5 | 484 | 28 | 437.1 | 3.5 | 0.8 | Single Age |
| SFB38_120 | 1556.00 | 105.30 | 0.3877 | 0.0062 | 0.05024 | 0.00062 | 0.461 | 332.7 | 4.5 | 316   | 3.8 | 474 | 31 | 316.0 | 3.8 | 5.0 | Single Age |

| Sample Name: 09-SFB-11               |       |                 |          |          |         |          |       |                    |          |        |          |        |          |          |          |              |               |
|--------------------------------------|-------|-----------------|----------|----------|---------|----------|-------|--------------------|----------|--------|----------|--------|----------|----------|----------|--------------|---------------|
| Upper Freshwater Molasse (14 ± 1 Ma) |       | Isotopic Ratios |          |          |         |          |       | Apparent Ages (Ma) |          |        |          |        |          |          |          |              |               |
| Grain #                              | U     | U/Th            | 207Pb    | 2σ error | 206Pb   | 2σ error | Error | 207Pb              | 2σ error | 206Pb  | 2σ error | 207Pb  | 2σ error | Best age | 2σ error | Discordance* | Rim, Core or  |
|                                      | (ppm) |                 | 235U     | (abs.)   | 238U    | (abs.)   | Corr. | 235U               | (Ma)     | 238U   | (Ma)     | 206Pb  | (Ma)     | (Ma)     | (Ma)     | %            | Single Age or |
| 09SFB11-1                            | -     | -               | 0.40239  | 9.6      | 0.04229 | 7.2      | 0.75  | 323.0              | 26.9     | 248.9  | 17.6     | 899    | 137.9    | DISC     | DISC     | 22.9         | Single Age    |
| 09SFB11-2                            | -     | -               | 0.58645  | 2        | 0.07209 | 1.7      | 0.85  | 459.2              | 7.4      | 437.9  | 7.2      | 567    | 24.1     | 437.9    | 7.2      | 4.6          | Single Age    |
| 09SFB11-3                            | -     | -               | 0.32959  | 1.9      | 0.04596 | 1.5      | 0.79  | 286.2              | 4.7      | 286.2  | 4.2      | 286    | 27.6     | 286.2    | 4.2      | 0.0          | Single Age    |
| 09SFB11-4                            | -     | -               | 0.30935  | 2.2      | 0.04151 | 1.8      | 0.82  | 277.6              | 5.4      | 266.4  | 4.7      | 373    | 27.2     | 266.4    | 4.7      | 4.0          | Single Age    |
| 09SFB11-5                            | -     | -               | 0.51932  | 5.8      | 0.05705 | 1.7      | 0.29  | 426.2              | 20.4     | 359.1  | 5.9      | 807    | 119.5    | DISC     | DISC     | 15.7         | Single Age    |
| 09SFB11-6                            | -     | -               | 0.3262   | 3.7      | 0.04303 | 3        | 0.81  | 284.5              | 9.2      | 269.3  | 7.9      | 411.3  | 49.9     | 269.3    | 7.9      | 5.3          | Single Age    |
| 09SFB11-7                            | -     | -               | 0.56375  | 2.5      | 0.06943 | 2        | 0.8   | 453.4              | 9.2      | 432.1  | 8.4      | 563.2  | 33       | 432.1    | 8.4      | 4.7          | Single Age    |
| 09SFB11-8                            | -     | -               | 0.03264  | 24.1     | 0.00438 | 24.1     | 1     | 32.2               | 7.7      | 27.8   | 6.7      | 373.3  | 27.2     | DISC     | DISC     | 13.7         | Single Age    |
| 09SFB11-9                            | -     | -               | 0.57422  | 3.6      | 0.07388 | 2.4      | 0.67  | 461.8              | 13.4     | 460.8  | 10.7     | 466.9  | 60.9     | 460.8    | 10.7     | 0.2          | Single Age    |
| 09SFB11-10                           | -     | -               | 0.5114   | 2.3      | 0.06602 | 1.9      | 0.83  | 424.0              | 8.0      | 417.6  | 7.7      | 459.4  | 29.1     | 417.6    | 7.7      | 1.5          | Single Age    |
| 09SFB11-11                           | -     | -               | 0.34331  | 2.1      | 0.04698 | 1.6      | 0.76  | 303.5              | 5.5      | 300.2  | 4.7      | 328.8  | 29.7     | 300.2    | 4.7      | 1.1          | Single Age    |
| 09SFB11-12                           | -     | -               | 0.57718  | 1.8      | 0.07168 | 1.3      | 0.72  | 463.6              | 6.7      | 447.4  | 5.6      | 544.8  | 26.4     | 447.4    | 5.6      | 3.5          | Single Age    |
| 09SFB11-13                           | -     | -               | 0.31056  | 3.6      | 0.0409  | 3.2      | 0.89  | 276.5              | 8.8      | 260.4  | 8.2      | 415.2  | 38.5     | 260.4    | 8.2      | 5.8          | Single Age    |
| 09SFB11-15                           | -     | -               | 0.45212  | 3.4      | 0.0568  | 3.1      | 0.91  | 375.1              | 10.7     | 352.2  | 10.6     | 519.4  | 28.8     | 352.2    | 10.6     | 6.1          | Single Age    |
| 09SFB11-16                           | -     | -               | 0.26383  | 2.5      | 0.03449 | 2        | 0.8   | 237.3              | 5.3      | 218.1  | 4.3      | 431.7  | 33.8     | 218.1    | 4.3      | 8.1          | Single Age    |
| 09SFB11-17                           | -     | -               | 0.27221  | 2.3      | 0.03695 | 1.9      | 0.83  | 247.9              | 5.1      | 237.5  | 4.4      | 347    | 29.7     | 237.5    | 4.4      | 4.2          | Single Age    |
| 09SFB11-18                           | -     | -               | 0.52228  | 3.9      | 0.05056 | 1.5      | 0.38  | 425.6              | 13.7     | 317.0  | 4.6      | 1066.5 | 74.1     | DISC     | DISC     | 25.5         | Single Age    |
| 09SFB11-19                           | -     | -               | 0.35419  | 2.2      | 0.04816 | 1.8      | 0.82  | 308.8              | 5.9      | 304.2  | 5.4      | 343.5  | 29.7     | 304.2    | 5.4      | 1.5          | Single Age    |
| 09SFB11-20                           | -     | -               | 0.94058  | 2.8      | 0.11398 | 1.4      | 0.5   | 685.6              | 14.1     | 712.6  | 9.5      | 598.1  | 52.9     | 712.6    | 9.5      | -3.9         | Single Age    |
| 09SFB11-21                           | -     | -               | 0.32356  | 2.3      | 0.04481 | 1.7      | 0.74  | 290.6              | 5.8      | 289.3  | 4.8      | 301.7  | 34.5     | 289.3    | 4.8      | 0.4          | Single Age    |
| 09SFB11-22                           | -     | -               | 0.70514  | 2.1      | 0.08845 | 1.7      | 0.81  | 542.0              | 8.9      | 546.6  | 8.9      | 523    | 26.5     | 546.6    | 8.9      | -0.8         | Single Age    |
| 09SFB11-23                           | -     | -               | 27.06053 | 21.1     | 0.24114 | 21       | 1     | 3385.6             | 231.0    | 1392.6 | 268.5    |        |          | DISC     | DISC     | 58.9         | Single Age    |
| 09SFB11-24                           | -     | -               | 0.25555  | 6.8      | 0.03115 | 6.6      | 0.97  | 239.6              | 14.6     | 205.8  | 13.4     | 585.6  | 39.6     | DISC     | DISC     | 14.1         | Single Age    |
| 09SFB11-25                           | -     | -               | 1.74155  | 3.5      | 0.0579  | 2.2      | 0.63  | 1028.4             | 22.9     | 365.2  | 7.8      | 2967.2 | 44.3     | DISC     | DISC     | 64.5         | Single Age    |
| 09SFB11-26                           | -     | -               | 0.18237  | 4.2      | 0.02164 | 4        | 0.95  | 186.2              | 7.2      | 152.1  | 6.0      | 643.6  | 28.2     | DISC     | DISC     | 18.3         | Single Age    |
| 09SFB11-27                           | -     | -               | 0.28646  | 2.8      | 0.03946 | 2.4      | 0.86  | 257.5              | 6.4      | 251.3  | 5.9      | 313.7  | 34.4     | 251.3    | 5.9      | 2.4          | Single Age    |
| 09SFB11-28                           | -     | -               | 0.20166  | 5.7      | 0.02561 | 4.4      | 0.77  | 193.1              | 10.1     | 169.2  | 7.4      | 495.7  | 83.7     | DISC     | DISC     | 12.4         | Single Age    |
| 09SFB11-29                           | -     | -               | 0.53148  | 2.7      | 0.06486 | 2.1      | 0.78  | 426.2              | 9.4      | 397.8  | 8.1      | 582.9  | 37.4     | 397.8    | 8.1      | 6.7          | Single Age    |
| 09SFB11-30                           | -     | -               | 0.78667  | 2        | 0.09401 | 1.7      | 0.85  | 594.3              | 9.0      | 585.4  | 9.5      | 628.3  | 21.7     | 585.4    | 9.5      | 1.5          | Single Age    |
| 09SFB11-31                           | -     | -               | 0.72687  | 2.1      | 0.08872 | 1.6      | 0.76  | 555.4              | 9.0      | 548.8  | 8.4      | 582.5  | 28.5     | 548.8    | 8.4      | 1.2          | Single Age    |
| 09SFB11-32                           | -     | -               | 0.372    | 2.8      | 0.04711 | 1.8      | 0.64  | 320.2              | 7.7      | 295.7  | 5.2      | 502.1  | 49.2     | 295.7    | 5.2      | 7.7          | Single Age    |
| 09SFB11-33                           | -     | -               | 0.9458   | 3.9      | 0.04709 | 3.1      | 0.79  | 1821.3             | 33.6     | 300.5  | 9.1      |        |          | DISC     | DISC     | 83.5         | Single Age    |
| 09SFB11-34                           | -     | -               | 0.33519  | 2.8      | 0.04567 | 1.9      | 0.68  | 296.5              | 7.2      | 291.2  | 5.4      | 338.5  | 48.3     | 291.2    | 5.4      | 1.8          | Single Age    |
| 09SFB11-35                           | -     | -               | 0.84112  | 2        | 0.10303 | 1.8      | 0.9   | 603.3              | 9.1      | 610.9  | 10.5     | 575    | 19.7     | 610.9    | 10.5     | -1.3         | Single Age    |
| 09SFB11-36                           | -     | -               | 0.4868   | 3.7      | 0.05857 | 3        | 0.81  | 394.6              | 12.2     | 358.3  | 10.5     | 613.5  | 46       | 358.3    | 10.5     | 9.2          | Single Age    |
| 09SFB11-37                           | -     | -               | 0.40866  | 2        | 0.05325 | 1.7      | 0.85  | 340.1              | 5.8      | 325.9  | 5.4      | 438.7  | 22.4     | 325.9    | 5.4      | 4.2          | Single Age    |
| 09SFB11-38                           | -     | -               | 0.26145  | 3.3      | 0.02967 | 2.6      | 0.79  | 234.0              | 6.9      | 186.8  | 4.8      | 738.7  | 42.9     | DISC     | DISC     | 20.2         | Single Age    |
| 09SFB11-39                           | -     | -               | 0.21139  | 3        | 0.02256 | 2.2      | 0.73  | 196.2              | 5.4      | 145.0  | 3.2      | 867.2  | 44.1     | DISC     | DISC     | 26.1         | Single Age    |
| 09SFB11-40                           | -     | -               | 0.24071  | 4.3      | 0.02952 | 3.2      | 0.74  | 211.6              | 8.2      | 180.6  | 5.7      | 572.3  | 64.3     | DISC     | DISC     | 14.7         | Single Age    |
| 09SFB11-41                           | -     | -               | 0.34802  | 2.3      | 0.04816 | 1.8      | 0.78  | 300.6              | 6.0      | 300.2  | 5.3      | 303.4  | 32.3     | 300.2    | 5.3      | 0.1          | Single Age    |
| 09SFB11-42                           | -     | -               | 0.32287  | 2.3      | 0.04468 | 1.7      | 0.74  | 285.5              | 5.7      | 283.3  | 4.7      | 303.4  | 36.9     | 283.3    | 4.7      | 0.8          | Single Age    |
| 09SFB11-43                           | -     | -               | 0.55658  | 1.7      | 0.07193 | 1.3      | 0.76  | 456.0              | 6.3      | 455.8  | 5.7      | 457.3  | 24.6     | 455.8    | 5.7      | 0.0          | Single Age    |
| 09SFB11-44                           | -     | -               | 0.35074  | 2.3      | 0.04769 | 1.7      | 0.74  | 306.6              | 6.1      | 301.8  | 5.0      | 343.3  | 36.6     | 301.8    | 5.0      | 1.6          | Single Age    |
| 09SFB11-45                           | -     | -               | 0.38627  | 2        | 0.05267 | 1.4      | 0.7   | 330.1              | 5.7      | 329.1  | 4.5      | 336.9  | 32       | 329.1    | 4.5      | 0.3          | Single Age    |
| 09SFB11-46                           | -     | -               | 0.37197  | 4.4      | 0.05123 | 2        | 0.45  | 320.0              | 12.1     | 320.8  | 6.3      | 314.1  | 91.2     | 320.8    | 6.3      | -0.2         | Single Age    |
| 09SFB11-47                           | -     | -               | 2.39222  | 1.8      | 0.16044 | 1.6      | 0.89  | 1247.8             | 13.0     | 968.6  | 14.4     | 1768.3 | 14.7     | DISC     | DISC     | 45.2         | Single Age    |
| 09SFB11-48                           | -     | -               | 0.49702  | 2.2      | 0.06502 | 1.7      | 0.77  | 406.9              | 7.4      | 402.8  | 6.6      | 430.1  | 31.5     | 402.8    | 6.6      | 1.0          | Single Age    |
| 09SFB11-49                           | -     | -               | 0.34259  | 3.2      | 0.04834 | 1.8      | 0.56  | 299.0              | 8.3      | 304.2  | 5.3      | 259    | 63.2     | 304.2    | 5.3      | -1.7         | Single Age    |
| 09SFB11-50                           | -     | -               | 0.31751  | 2.2      | 0.04327 | 1.6      | 0.73  | 277.4              | 5.4      | 270.3  | 4.2      | 338.1  | 34.4     | 270.3    | 4.2      | 2.6          | Single Age    |
| 09SFB11-51                           | -     | -               | 0.68433  | 7.1      | 0.02113 | 3.7      | 0.52  | 528.0              | 29.7     | 134.3  | 4.9      | 3085.7 | 100.8    | DISC     | DISC     | 74.6         | Single Age    |
| 09SFB11-52                           | -     | -               | 0.30986  | 4.2      | 0.03996 | 3.9      | 0.93  | 265.3              | 9.9      | 243.6  | 9.3      | 461.9  | 33.6     | 243.6    | 9.3      | 8.2          | Single Age    |
| 09SFB11-53                           | -     | -               | 0.34352  | 1.9      | 0.0459  | 1.2      | 0.63  | 299.1              | 4.9      | 288.5  | 3.4      | 382.6  | 34.1     | 288.5    | 3.4      | 3.5          | Single Age    |
| 09SFB11-54                           | -     | -               | 0.33021  | 2.4      | 0.04603 | 1.7      | 0.71  | 292.4              | 6.1      | 293.0  | 4.9      | 286.9  | 39.4     | 293.0    | 4.9      | -0.2         | Single Age    |
| 09SFB11-55                           | -     | -               | 0.48043  | 5.6      | 0.05941 | 2.5      | 0.45  | 393.2              | 18.4     | 366.4  | 8.9      | 554.2  | 113      | 366.4    | 8.9      | 6.8          | Single Age    |
| 09SFB11-56                           | -     | -               | 2.43265  | 3        | 0.20645 | 2.6      | 0.7   | 1288.7             | 27.4     | 1266.4 | 30.0     | 1326   | 53.2     | 1326.0   | 53.2     | 4.5          | Single Age    |
| 09SFB11-57                           | -     | -               | 0.72216  | 3        | 0.08011 | 2.5      | 0.83  | 538.2              | 12.6     | 481.5  | 11.6     | 786.6  | 36.1     | DISC     | DISC     | 10.5         | Single Age    |
| 09SFB11-58                           | -     | -               | 1.1481   | 5.8      | 0.11796 | 5.1      | 0.88  | 724.9              | 30.5     | 655.6  | 31.9     | 945.7  | 58.4     | 655.6    | 31.9     | 9.6          | Single Age    |
| 09SFB11-59                           | -     | -               | 0.29314  | 2.8      | 0.04083 | 2.4      | 0.86  | 261.2              | 6.5      | 258.2  | 6.1      | 288.5  | 32.3     | 258.2    | 6.1      | 1.1          | Single Age    |
| 09SFB11-60                           | -     | -               | 0.67782  | 2.1      | 0.08492 | 1.3      | 0.62  | 524.5              | 8.6      | 524.3  | 6.5      | 525.5  | 37.7     | 524.3    | 6.5      | 0.0          | Single Age    |
| 09SFB11-61                           | -     | -               | 0.36399  | 2.3      | 0.04916 | 1.7      | 0.74  | 313.1              | 6.2      | 307.0  | 5.1      | 358.6  | 36.6     | 307.0    | 5.1      | 1.9          | Single Age    |
| 09SFB11-62                           | -     | -               | 0.68734  | 1.9      | 0.08586 | 1.5      | 0.79  | 529.9              | 7.9      | 529.5  | 7.6      | 531.9  | 26.5     | 529.5    | 7.6      | 0.1          | Single Age    |
| 09SFB11-63                           | -     | -               | 0.50228  | 2.2      | 0.06661 | 1.8      | 0.82  | 410.9              | 7.5      | 412.9  | 7.2      | 399.6  | 27.1     | 412.9    | 7.2      | -0.5         | Single Age    |
| 09SFB11-64                           | -     | -               | 0.51497  | 3        | 0.06148 | 2.7      | 0.9   | 424.4              | 10.5     | 387.4  | 10.2     | 630.3  | 30.4     | 387.4    | 10.2     | 8.7          | Single Age    |
| 09SFB11-65                           | -     | -               | 0.33876  | 2        | 0.04687 | 1.6      | 0.8   | 294.9              | 5.1      | 293.8  | 4.6      | 303.7  | 27.6     | 293.8    | 4.6      | 0.4          | Single Age    |
| 09SFB11-66                           | -     | -               | 0.74223  | 2        | 0.09124 | 1.6      | 0.8   | 564.2              | 8.7      | 563.4  | 8.6      | 567.3  | 26.3     | 563.4    | 8.6      | 0.1          | Single Age    |
| 09SFB11-67                           | -     | -               | 0.32862  | 2        | 0.04551 | 1.7      | 0.85  | 286.1              | 5.0      | 284.2  | 4.7      | 301.9  | 25.3     | 284.2    | 4.7      | 0.7          | Single Age    |
| 09SFB11-68                           | -     | -               | 0.32452  | 2.5      | 0.04162 | 1.6      | 0.64  | 282.3              | 6.2      | 259.7  | 4.1      | 474.1  | 42.6     | 259.7    | 4.1      | 8.0          | Single Age    |
| 09SFB11-69                           | -     | -               | 0.33471  | 2        | 0.04623 | 1.6      | 0.8   | 296.0              | 5.1      | 294.4  | 4.6      | 307.9  | 27.5     | 294.4    | 4.6      | 0.5          | Single Age    |
| 09SFB11-70                           | -     | -               | 0.39688  | 5.4      | 0.04897 | 5.1      | 0.94  | 329.7              | 15.3     | 298.1  | 14.9     | 559    | 39.7     | 298.1    | 14.9     | 9.6          | Single Age    |
| 09SFB11-71                           | -     | -               | 0.53221  | 2.5      | 0.06856 | 1.9      | 0.76  | 432.9              | 8.9      | 427.1  | 7.9      | 464.2  | 35.9     | 427.1    | 7.9      | 1.3          | Single Age    |
| 09SFB11-72                           | -     | -               | 0.34129  | 2.1      | 0.04665 | 1.5      | 0.71  | 300.6              | 5.5      | 296.6  | 4.3      | 331.5  | 34.3     | 296.6    | 4.3      | 1.3          | Single Age    |
| 09SFB11-73                           | -     | -               | 0.42914  | 2.6      | 0.05714 | 1.9      | 0.73  | 369.1              | 8.1      | 365.7  | 6.8      | 390.8  | 41       | 365.7    | 6.8      | 0.9          | Single Age    |
| 09SFB11-74                           | -     | -               | 0.54191  | 2.8      | 0.06475 | 1.9      | 0.68  | 438.2              | 10.0     | 402.8  | 7.4      | 628.7  | 43.7     | 402.8    | 7.4      | 8.1          | Single Age    |
| 09SFB11-75                           | -     | -               | 0.34479  | 2.1      | 0.04775 | 1.8      |       |                    |          |        |          |        |          |          |          |              |               |

|             |   |   |          |      |         |      |      |        |      |        |      |        |       |        |      |      |            |
|-------------|---|---|----------|------|---------|------|------|--------|------|--------|------|--------|-------|--------|------|------|------------|
| 09SFB11-86  | - | - | 0.32686  | 2.4  | 0.04436 | 1.8  | 0.75 | 291.0  | 6.1  | 284.0  | 5.0  | 347.4  | 36.6  | 284.0  | 5.0  | 2.4  | Single Age |
| 09SFB11-87  | - | - | 0.75165  | 3.1  | 0.09207 | 1.3  | 0.42 | 547.5  | 13.2 | 541.0  | 6.7  | 574.9  | 62.1  | 541.0  | 6.7  | 1.2  | Single Age |
| 09SFB11-88  | - | - | 0.41371  | 1.7  | 0.05656 | 1.1  | 0.65 | 351.0  | 5.1  | 354.1  | 3.8  | 331.2  | 29.8  | 354.1  | 3.8  | -0.9 | Single Age |
| 09SFB11-89  | - | - | 0.56642  | 2    | 0.07235 | 1.7  | 0.85 | 459.1  | 7.4  | 454.4  | 7.5  | 482.9  | 24.4  | 454.4  | 7.5  | 1.0  | Single Age |
| 09SFB11-90  | - | - | 1.61459  | 2.7  | 0.15204 | 2.1  | 0.78 | 980.4  | 17.1 | 918.6  | 18.0 | 1121.7 | 34.3  | 1121.7 | 34.3 | 18.1 | Single Age |
| 09SFB11-91  | - | - | 0.78603  | 2.3  | 0.09155 | 1.7  | 0.74 | 588.9  | 10.3 | 564.7  | 9.2  | 683.5  | 32.4  | 564.7  | 9.2  | 4.1  | Single Age |
| 09SFB11-92  | - | - | 0.68056  | 3.2  | 0.08519 | 2.8  | 0.87 | 531.4  | 13.3 | 532.3  | 14.3 | 527.4  | 33.2  | 532.3  | 14.3 | -0.2 | Single Age |
| 09SFB11-93  | - | - | 0.36097  | 2.6  | 0.04712 | 2    | 0.77 | 318.7  | 7.1  | 303.0  | 5.9  | 435    | 36    | 303.0  | 5.9  | 4.9  | Single Age |
| 09SFB11-94  | - | - | 0.17921  | 3    | 0.02406 | 2.4  | 0.8  | 162.3  | 4.5  | 148.3  | 3.5  | 372    | 41.1  | 148.3  | 3.5  | 8.6  | Single Age |
| 09SFB11-95  | - | - | 0.55142  | 1.8  | 0.06993 | 1.4  | 0.78 | 445.1  | 6.5  | 434.7  | 5.9  | 499.1  | 26.7  | 434.7  | 5.9  | 2.3  | Single Age |
| 09SFB11-96  | - | - | 0.59727  | 2.8  | 0.07372 | 2    | 0.71 | 473.3  | 10.6 | 456.0  | 8.8  | 558.1  | 42    | 456.0  | 8.8  | 3.7  | Single Age |
| 09SFB11-97  | - | - | 4.74802  | 2    | 0.29503 | 1.7  | 0.85 | 1797.7 | 17.0 | 1705.5 | 25.5 | 1906.6 | 18.1  | 1906.6 | 18.1 | 10.5 | Single Age |
| 09SFB11-98  | - | - | 0.61492  | 2.1  | 0.07493 | 1.6  | 0.76 | 484.1  | 8.1  | 462.8  | 7.1  | 586.4  | 30.7  | 462.8  | 7.1  | 4.4  | Single Age |
| 09SFB11-99  | - | - | 0.32888  | 1.9  | 0.04509 | 1.5  | 0.79 | 289.5  | 4.8  | 285.2  | 4.2  | 324.5  | 25.2  | 285.2  | 4.2  | 1.5  | Single Age |
| 09SFB11-100 | - | - | 0.5584   | 2.3  | 0.06979 | 1.7  | 0.74 | 450.9  | 8.4  | 435.3  | 7.2  | 531    | 35.4  | 435.3  | 7.2  | 3.5  | Single Age |
| 09SFB11-101 | - | - | 0.33105  | 2.2  | 0.04569 | 1.6  | 0.73 | 290.6  | 5.6  | 288.2  | 4.5  | 309.3  | 34.5  | 288.2  | 4.5  | 0.8  | Single Age |
| 09SFB11-103 | - | - | 0.30971  | 2.5  | 0.04281 | 1.8  | 0.72 | 272.5  | 6.0  | 268.7  | 4.7  | 305.8  | 39.2  | 268.7  | 4.7  | 1.4  | Single Age |
| 09SFB11-104 | - | - | 0.41298  | 3    | 0.05264 | 2.6  | 0.87 | 367.0  | 9.3  | 348.2  | 8.8  | 487.7  | 33.5  | 348.2  | 8.8  | 5.1  | Single Age |
| 09SFB11-105 | - | - | 0.35869  | 1.9  | 0.04742 | 1.4  | 0.74 | 313.8  | 5.1  | 301.5  | 4.1  | 406.4  | 29.4  | 301.5  | 4.1  | 3.9  | Single Age |
| 09SFB11-106 | - | - | 0.58303  | 2.1  | 0.07016 | 1.7  | 0.81 | 475.5  | 8.0  | 447.4  | 7.4  | 613.3  | 28.3  | 447.4  | 7.4  | 5.9  | Single Age |
| 09SFB11-107 | - | - | 0.71528  | 2.3  | 0.08639 | 1.6  | 0.7  | 544.7  | 9.7  | 530.3  | 8.2  | 605.4  | 37.2  | 530.3  | 8.2  | 2.6  | Single Age |
| 09SFB11-108 | - | - | 0.33759  | 2.1  | 0.04639 | 1.3  | 0.62 | 292.4  | 5.3  | 289.0  | 3.7  | 319.5  | 39.1  | 289.0  | 3.7  | 1.2  | Single Age |
| 09SFB11-109 | - | - | 1.23606  | 12.7 | 0.02296 | 9.1  | 0.72 | 780.1  | 71.6 | 137.0  | 12.3 | 3872.8 | 141.2 | DISC   | DISC | 82.4 | Single Age |
| 09SFB11-110 | - | - | 0.43346  | 2.3  | 0.05634 | 2    | 0.87 | 367.7  | 7.1  | 355.6  | 6.9  | 444.6  | 24.6  | 355.6  | 6.9  | 3.3  | Single Age |
| 09SFB11-111 | - | - | 0.33762  | 2.4  | 0.04699 | 1.4  | 0.58 | 295.7  | 6.2  | 296.4  | 4.1  | 290.3  | 44    | 296.4  | 4.1  | -0.2 | Single Age |
| 09SFB11-112 | - | - | 0.38106  | 2.1  | 0.05162 | 1.5  | 0.71 | 330.7  | 5.9  | 327.7  | 4.8  | 351.9  | 32    | 327.7  | 4.8  | 0.9  | Single Age |
| 09SFB11-113 | - | - | 0.67202  | 3.1  | 0.08472 | 1.9  | 0.61 | 511.4  | 12.5 | 511.2  | 9.3  | 512.1  | 53.6  | 511.2  | 9.3  | 0.0  | Single Age |
| 09SFB11-114 | - | - | 0.53399  | 4.2  | 0.06651 | 2.6  | 0.62 | 448.1  | 15.3 | 430.7  | 10.8 | 538.6  | 73.9  | 430.7  | 10.8 | 3.9  | Single Age |
| 09SFB11-115 | - | - | 0.48365  | 1.8  | 0.06301 | 1.5  | 0.83 | 396.8  | 5.9  | 389.6  | 5.7  | 439.3  | 22.4  | 389.6  | 5.7  | 1.8  | Single Age |
| 09SFB11-116 | - | - | 0.36041  | 2.2  | 0.0475  | 1.6  | 0.73 | 311.9  | 5.9  | 298.4  | 4.7  | 413.5  | 33.9  | 298.4  | 4.7  | 4.3  | Single Age |
| 09SFB11-117 | - | - | 0.41686  | 1.9  | 0.05666 | 1.5  | 0.79 | 357.6  | 5.7  | 359.7  | 5.2  | 344.1  | 25.1  | 359.7  | 5.2  | -0.6 | Single Age |
| 09SFB11-118 | - | - | 0.35037  | 2.1  | 0.04791 | 1.5  | 0.71 | 308.0  | 5.6  | 305.0  | 4.5  | 330.5  | 32.1  | 305.0  | 4.5  | 1.0  | Single Age |
| 09SFB11-119 | - | - | 0.33715  | 1.6  | 0.04716 | 1.3  | 0.81 | 292.6  | 4.1  | 294.3  | 3.7  | 278.7  | 20.8  | 294.3  | 3.7  | -0.6 | Single Age |
| 09SFB11-120 | - | - | 1.85181  | 16.4 | 0.01713 | 16.4 | 1    | 672.8  | 84.1 | 65.8   | 9.1  | DISC   | DISC  | DISC   | DISC | 91.7 | Single Age |
| 09SFB11-121 | - | - | 0.0335   | 4.3  | 0.00486 | 2.5  | 0.58 | 32.8   | 1.4  | 30.8   | 0.8  | 194.8  | 83.5  | 30.6   | 0.6  | 6.7  | Single Age |
| 09SFB11-122 | - | - | 0.44222  | 2.9  | 0.05491 | 2.5  | 0.86 | 356.2  | 8.7  | 327.8  | 8.0  | 545.2  | 3.1   | 327.8  | 8.0  | 8.0  | Single Age |
| 09SFB11-123 | - | - | 0.32058  | 1.8  | 0.04455 | 1.4  | 0.78 | 282.9  | 4.5  | 281.5  | 3.9  | 294    | 27.6  | 281.5  | 3.9  | 0.5  | Single Age |
| 09SFB11-124 | - | - | 0.37884  | 1.7  | 0.05193 | 1.4  | 0.82 | 327.8  | 4.8  | 328.2  | 4.5  | 325.2  | 22.9  | 328.2  | 4.5  | -0.1 | Single Age |
| 09SFB11-125 | - | - | 0.56144  | 2.6  | 0.07193 | 2.1  | 0.81 | 458.6  | 9.6  | 455.0  | 9.2  | 476.3  | 35.8  | 455.0  | 9.2  | 0.8  | Single Age |
| 09SFB11-126 | - | - | 0.56173  | 1.4  | 0.07244 | 1.2  | 0.86 | 452.1  | 5.1  | 450.3  | 5.2  | 461.7  | 17.8  | 450.3  | 5.2  | 0.4  | Single Age |
| 09SFB11-127 | - | - | 0.75527  | 3.2  | 0.0661  | 1.5  | 0.47 | 577.0  | 14.2 | 417.9  | 6.1  | 1266.2 | 55.6  | DISC   | DISC | 27.6 | Single Age |
| 09SFB11-128 | - | - | 0.52911  | 3.3  | 0.06696 | 2.6  | 0.79 | 443.7  | 11.9 | 432.3  | 10.9 | 503.7  | 44.6  | 432.3  | 10.9 | 2.6  | Single Age |
| 09SFB11-129 | - | - | 0.62169  | 4.4  | 0.07742 | 2.2  | 0.5  | 507.2  | 17.7 | 500.2  | 10.6 | 539    | 85.3  | 500.2  | 10.6 | 1.4  | Single Age |
| 09SFB11-130 | - | - | 1.62469  | 1.9  | 0.16058 | 1.6  | 0.84 | 955.6  | 11.8 | 926.0  | 13.8 | 1024.6 | 22.4  | 1024.6 | 22.4 | 9.6  | Single Age |
| 09SFB11-131 | - | - | 0.35205  | 2.3  | 0.04613 | 1.5  | 0.65 | 305.5  | 6.1  | 289.9  | 4.3  | 426.5  | 38.3  | 289.9  | 4.3  | 5.1  | Single Age |
| 09SFB11-132 | - | - | 0.31535  | 1.7  | 0.04349 | 1.4  | 0.82 | 276.4  | 4.1  | 272.4  | 3.7  | 311.2  | 22.9  | 272.4  | 3.7  | 1.4  | Single Age |
| 09SFB11-133 | - | - | 8.92746  | 2.8  | 0.08261 | 1.8  | 0.64 | 2329.9 | 25.9 | 511.3  | 8.9  | DISC   | DISC  | DISC   | DISC | 78.1 | Single Age |
| 09SFB11-134 | - | - | 0.30047  | 3.3  | 0.04068 | 2.5  | 0.76 | 263.8  | 7.7  | 253.9  | 6.2  | 353    | 48.1  | 253.9  | 6.2  | 3.8  | Single Age |
| 09SFB11-135 | - | - | 4.30098  | 3.4  | 0.28363 | 2.8  | 0.82 | 1694.0 | 28.4 | 1610.4 | 40.0 | 1799.1 | 36.8  | 1799.1 | 36.8 | 10.5 | Single Age |
| 09SFB11-136 | - | - | 0.58601  | 2.6  | 0.07446 | 1.6  | 0.62 | 472.1  | 9.9  | 467.4  | 7.2  | 494.7  | 44.7  | 467.4  | 7.2  | 1.0  | Single Age |
| 09SFB11-138 | - | - | 0.37081  | 2.9  | 0.04526 | 1.8  | 0.62 | 320.1  | 8.0  | 285.2  | 5.0  | 582.6  | 50.8  | DISC   | DISC | 10.9 | Single Age |
| 09SFB11-139 | - | - | 0.64793  | 1.9  | 0.08059 | 1.4  | 0.74 | 506.7  | 7.6  | 499.0  | 6.7  | 541.4  | 28.6  | 499.0  | 6.7  | 1.5  | Single Age |
| 09SFB11-140 | - | - | 0.30974  | 6.9  | 0.03638 | 6.3  | 0.91 | 266.9  | 16.3 | 223.7  | 13.9 | 665.5  | 63.3  | DISC   | DISC | 16.2 | Single Age |
| 09SFB11-141 | - | - | 8.63306  | 3.3  | 0.42533 | 2.2  | 0.67 | 2300.1 | 30.5 | 2284.6 | 42.5 | 2313.8 | 41.7  | 2313.8 | 41.7 | 1.3  | Single Age |
| 09SFB11-142 | - | - | 0.70819  | 2.6  | 0.08786 | 2    | 0.77 | 551.7  | 11.1 | 552.8  | 10.6 | 547    | 35.3  | 552.8  | 10.6 | -0.2 | Single Age |
| 09SFB11-143 | - | - | 0.5767   | 7.7  | 0.0615  | 7.3  | 0.95 | 474.4  | 29.6 | 396.9  | 28.2 | 868.9  | 54.8  | DISC   | DISC | 16.3 | Single Age |
| 09SFB11-144 | - | - | 0.77981  | 3    | 0.09384 | 1.9  | 0.63 | 575.0  | 13.3 | 565.4  | 10.3 | 613.2  | 50.5  | 565.4  | 10.3 | 1.7  | Single Age |
| 09SFB11-145 | - | - | 77.24869 | 4    | 0.66872 | 2.7  | 0.68 | 4422.1 | 40.9 | 3288.4 | 69.9 | DISC   | DISC  | DISC   | DISC | 25.6 | Single Age |
| 09SFB11-146 | - | - | 0.33525  | 4    | 0.04047 | 2.8  | 0.7  | 295.8  | 10.3 | 258.0  | 7.1  | 606.4  | 61.8  | DISC   | DISC | 12.8 | Single Age |
| 09SFB11-147 | - | - | 0.61273  | 2.2  | 0.0778  | 1.9  | 0.86 | 488.5  | 8.6  | 486.8  | 8.9  | 496.4  | 24.5  | 486.8  | 8.9  | 0.3  | Single Age |

| Sample Name:                           |         | 09-SFB-07 |        |                 |         |          |         |       |          |       |                    |        |          |          |          |              |              |  |  |  |  |  |  |
|----------------------------------------|---------|-----------|--------|-----------------|---------|----------|---------|-------|----------|-------|--------------------|--------|----------|----------|----------|--------------|--------------|--|--|--|--|--|--|
| Upper Freshwater Molasse (15.5 ± 1 Ma) |         |           |        | Isotopic Ratios |         |          |         |       |          |       | Apparent Ages (Ma) |        |          |          |          |              |              |  |  |  |  |  |  |
| Grain #                                | U (ppm) | U/Th      | 207Pb  | 2σ error        | 206Pb   | 2σ error | Error   | 207Pb | 2σ error | 206Pb | 2σ error           | 207Pb  | 2σ error | Best age | 2σ error | Discordance* | Rim, Core or |  |  |  |  |  |  |
|                                        |         |           | 235U   | (abs.)          | 238U    | (abs.)   | Corr.   | 235U  | (Ma)     | 238U  | (Ma)               | 207Pb  | (Ma)     | (Ma)     | (Ma)     | %            | Single Age   |  |  |  |  |  |  |
| SFB07_1                                | 232.1   | 2.17      | 0.3501 | 0.0039          | 0.04839 | 0.00039  | 0.43    | 304.7 | 2.9      | 304.6 | 2.4                | 311    | 14       | 304.6    | 2.4      | 0.0          | Single Age   |  |  |  |  |  |  |
| SFB07_2                                | 101.3   | 1.29      | 0.378  | 0.0079          | 0.04756 | 0.00061  | 0.24005 | 326.6 | 6.1      | 299.5 | 3.8                | 503    | 27       | 299.5    | 3.8      | 8.3          | Single Age   |  |  |  |  |  |  |
| SFB07_3                                | 470     | 90.00     | 0.439  | 0.013           | 0.0588  | 0.0013   | 0.7532  | 369.1 | 9        | 368   | 8.2                | 363    | 18       | 368.0    | 8.2      | 0.3          | Rim          |  |  |  |  |  |  |
| SFB07_3                                | 113.5   | 1.46      | 0.734  | 0.019           | 0.0914  | 0.002    | 0.73886 | 560   | 11       | 564   | 12                 | 546    | 19       | 564.0    | 12.0     | -0.7         | Core         |  |  |  |  |  |  |
| SFB07_4                                | 557     | 1.28      | 0.3396 | 0.0052          | 0.04659 | 0.00067  | 0.79498 | 296.8 | 3.9      | 293.6 | 4.1                | 329    | 15       | 293.6    | 4.1      | 1.1          | Single Age   |  |  |  |  |  |  |
| SFB07_5                                | 384     | 0.94      | 0.5745 | 0.0048          | 0.07443 | 0.00056  | 0.43317 | 460.8 | 3.1      | 462.8 | 3.4                | 453    | 12       | 462.8    | 3.4      | -0.4         | Single Age   |  |  |  |  |  |  |
| SFB07_6                                | 666     | 3.43      | 0.3492 | 0.0031          | 0.04835 | 0.00047  | 0.66764 | 304.1 | 2.4      | 304.4 | 2.9                | 299.1  | 9.3      | 304.4    | 2.9      | -0.1         | Single Age   |  |  |  |  |  |  |
| SFB07_7                                | 1550    | 2.60      | 0.3409 | 0.0036          | 0.04645 | 0.00046  | 0.7116  | 297.8 | 2.7      | 292.7 | 2.8                | 355    | 12       | 292.7    | 2.8      | 1.7          | Single Age   |  |  |  |  |  |  |
| SFB07_8                                | 663     | 2.37      | 0.3321 | 0.0068          | 0.04528 | 0.00084  | 0.51547 | 291.1 | 5.2      | 285.5 | 5.2                | 312    | 24       | 285.5    | 5.2      | 1.9          | Rim          |  |  |  |  |  |  |
| SFB07_8                                | 527     | 1.51      | 0.3655 | 0.0053          | 0.04976 | 0.00077  | 0.67311 | 316.3 | 3.9      | 313   | 4.8                | 344    | 16       | 313.0    | 4.8      | 1.0          | Core         |  |  |  |  |  |  |
| SFB07_10                               | 744     | 0.75      | 0.3151 | 0.004           | 0.04366 | 0.00064  | 0.80143 | 278.1 | 3.1      | 275.5 | 3.9                | 311    | 12       | 275.5    | 3.9      | 0.9          | Single Age   |  |  |  |  |  |  |
| SFB07_11                               | 827     | 2.92      | 0.343  | 0.0033          | 0.04748 | 0.00049  | 0.75948 | 299.4 | 2.5      | 299   | 3                  | 316.5  | 8.8      | 299.0    | 3.0      | 0.1          | Single Age   |  |  |  |  |  |  |
| SFB07_12                               | 536     | 1.60      | 0.3464 | 0.0038          | 0.0484  | 0.00054  | 0.71068 | 302   | 2.9      | 304.7 | 3.3                | 298    | 13       | 304.7    | 3.3      | -0.9         | Single Age   |  |  |  |  |  |  |
| SFB07_13                               | 253.9   | 1.12      | 0.3366 | 0.0038          | 0.04719 | 0.00048  | 0.32929 | 294.5 | 2.9      | 297.2 | 2.9                | 298    | 16       | 297.2    | 2.9      | -0.9         | Single Age   |  |  |  |  |  |  |
| SFB07_14                               | 167.1   | 5.08      | 6.625  | 0.052           | 0.3742  | 0.0031   | 0.78422 | 2062  | 6.9      | 2049  | 15                 | 2080.6 | 6.7      | 2080.6   | 6.7      | 1.5          | Single Age   |  |  |  |  |  |  |
| SFB07_15                               | 33.9    | 0.86      | 3.284  | 0.069           | 0.2602  | 0.0047   | 0.94829 | 1475  | 17       | 1490  | 24                 | 1462   | 15       | 1462.0   | 15.0     | -1.9         | Single Age   |  |  |  |  |  |  |
| SFB07_16                               | 851     | 2.35      | 0.3407 | 0.0022          | 0.04756 | 0.00039  | 0.45095 | 297.7 | 1.7      | 299.5 | 2.4                | 292.8  | 9.3      | 299.5    | 2.4      | -0.6         | Single Age   |  |  |  |  |  |  |
| SFB07_17                               | 271     | 1.63      | 0.3554 | 0.0038          | 0.04807 | 0.00053  | 0.17071 | 308.7 | 2.9      | 302.6 | 3.3                | 352    | 19       | 302.6    | 3.3      | 2.0          | Single Age   |  |  |  |  |  |  |
| SFB07_18                               | 424.8   | 1.22      | 0.3418 | 0.0037          | 0.04716 | 0.0004   | 0.48987 | 298.5 | 2.8      | 297   | 2.5                | 310    | 13       | 297.0    | 2.5      | 0.5          | Single Age   |  |  |  |  |  |  |
| SFB07_19                               | 589     | 1.74      | 4.82   | 0.23            | 0.28    | 0.013    | 0.97949 | 1781  | 41       | 1590  | 67                 | 1993   | 11       | DISC     | DISC     | 20.2         | Single Age   |  |  |  |  |  |  |
| SFB07_20                               | 121.7   | 3.61      | 0.76   | 0.018           | 0.0936  | 0.0021   | 0.85725 | 575   | 10       | 576   | 13                 | 574    | 15       | 576.0    | 13.0     | -0.2         | Single Age   |  |  |  |  |  |  |
| SFB07_21                               | 613     | 1.90      | 0.3275 | 0.0032          | 0.04539 | 0.00045  | 0.74276 | 287.9 | 2.5      | 286.1 | 2.8                | 303    | 12       | 286.1    | 2.8      | 0.6          | Single Age   |  |  |  |  |  |  |
| SFB07_22                               | 524     | 2.78      | 0.4166 | 0.0065          | 0.05315 | 0.00064  | 0.52645 | 353.6 | 4.6      | 333.8 | 3.9                | 489    | 25       | 333.8    | 3.9      | 5.6          | Single Age   |  |  |  |  |  |  |
| SFB07_23                               | 256     | 1.49      | 0.37   | 0.0053          | 0.04994 | 0.00071  | 0.54636 | 319.5 | 3.9      | 314.1 | 4.4                | 368    | 21       | 314.1    | 4.4      | 1.7          | Single Age   |  |  |  |  |  |  |
| SFB07_24                               | 937     | 3.61      | 0.6006 | 0.0055          | 0.07615 | 0.00068  | 0.82261 | 477.5 | 3.5      | 473.1 | 4.1                | 500.2  | 7.5      | 473.1    | 4.1      | 0.9          | Single Age   |  |  |  |  |  |  |
| SFB07_25                               | 252     | 3.12      | 0.618  | 0.016           | 0.0804  | 0.0018   | 0.47749 | 488   | 10       | 498   | 11                 | 458    | 23       | 498.0    | 11.0     | -2.0         | Rim          |  |  |  |  |  |  |
| SFB07_25                               | 129     | 3.61      | 2.726  | 0.072           | 0.194   | 0.0039   | 0.76261 | 1334  | 20       | 1142  | 21                 | 1658   | 16       | DISC     | DISC     | 31.1         | Core         |  |  |  |  |  |  |
| SFB07_26                               | 559     | 2.49      | 0.3498 | 0.0049          | 0.04831 | 0.00062  | 0.80678 | 304.4 | 3.7      | 304.6 | 3.7                | 313    | 11       | 304.6    | 3.7      | -0.1         | Single Age   |  |  |  |  |  |  |
| SFB07_27                               | 232     | 0.74      | 5.229  | 0.099           | 0.3316  | 0.0059   | 0.95907 | 1858  | 17       | 1845  | 29                 | 1870.7 | 7.5      | 1870.7   | 7.5      | 1.4          | Single Age   |  |  |  |  |  |  |
| SFB07_28                               | 546     | 2.10      | 0.3448 | 0.0042          | 0.04744 | 0.00054  | 0.58731 | 300.8 | 3.2      | 298.8 | 3.3                | 325    | 13       | 298.8    | 3.3      | 0.7          | Single Age   |  |  |  |  |  |  |
| SFB07_29                               | 379.1   | 1.05      | 0.3576 | 0.0043          | 0.04957 | 0.00051  | 0.40889 | 310.3 | 3.2      | 311.9 | 3.2                | 299    | 17       | 311.9    | 3.2      | -0.5         | Single Age   |  |  |  |  |  |  |
| SFB07_30                               | 522     | 1.84      | 0.4021 | 0.0057          | 0.05266 | 0.00074  | 0.40134 | 343.9 | 4.3      | 330.8 | 4.5                | 449    | 20       | 330.8    | 4.5      | 3.8          | Single Age   |  |  |  |  |  |  |
| SFB07_31                               | 74.2    | 1.81      | 0.3228 | 0.0052          | 0.0446  | 0.0006   | 0.54934 | 283.9 | 4        | 281.2 | 3.7                | 326    | 21       | 281.2    | 3.7      | 1.0          | Single Age   |  |  |  |  |  |  |
| SFB07_32                               | 1570    | 2.91      | 0.2934 | 0.0073          | 0.02972 | 0.00094  | 0.93148 | 261.1 | 5.8      | 188.8 | 5.9                | 974    | 18       | DISC     | DISC     | 27.7         | Single Age   |  |  |  |  |  |  |
| SFB07_33                               | 182.6   | 1.26      | 9.02   | 0.15            | 0.3748  | 0.0053   | 0.82457 | 2338  | 16       | 2051  | 25                 | 2596.2 | 8.4      | DISC     | DISC     | 21.0         | Single Age   |  |  |  |  |  |  |
| SFB07_35                               | 2020    | 147.00    | 0.344  | 0.014           | 0.0459  | 0.0017   | 0.92381 | 300   | 10       | 289   | 11                 | 373    | 24       | 289.0    | 11.0     | 3.7          | Rim          |  |  |  |  |  |  |
| SFB07_35                               | 268     | 1.48      | 0.889  | 0.026           | 0.1066  | 0.003    | 0.92062 | 645   | 14       | 653   | 18                 | 612    | 13       | 653.0    | 18.0     | -1.2         | Core         |  |  |  |  |  |  |
| SFB07_36                               | 75.89   | 1.31      | 1.925  | 0.021           | 0.1855  | 0.0018   | 0.2078  | 1089  | 7.3      | 1097  | 9.7                | 1067   | 12       | 1067.0   | 12.0     | -2.8         | Single Age   |  |  |  |  |  |  |
| SFB07_37                               | 1690    | 2.31      | 0.2822 | 0.009           | 0.0365  | 0.0013   | 0.96393 | 252.2 | 7.1      | 231   | 8.3                | 399    | 14       | 231.0    | 8.3      | 8.4          | Single Age   |  |  |  |  |  |  |
| SFB07_38                               | 381.4   | 0.79      | 0.3376 | 0.0032          | 0.0472  | 0.00043  | 0.4699  | 295.3 | 2.4      | 297.3 | 2.7                | 284    | 12       | 297.3    | 2.7      | -0.7         | Single Age   |  |  |  |  |  |  |
| SFB07_39                               | 838     | 3.27      | 0.328  | 0.0038          | 0.04497 | 0.0006   | 0.78862 | 288   | 2.9      | 283.6 | 3.7                | 329    | 9.8      | 283.6    | 3.7      | 1.5          | Single Age   |  |  |  |  |  |  |
| SFB07_40                               | 465     | 1.63      | 0.3429 | 0.0066          | 0.0459  | 0.0011   | 0.82758 | 299.3 | 5        | 289   | 6.5                | 391    | 24       | 289.0    | 6.5      | 3.4          | Single Age   |  |  |  |  |  |  |
| SFB07_41                               | 192.5   | 1.21      | 0.3645 | 0.0039          | 0.04991 | 0.00051  | 0.34759 | 315.5 | 2.9      | 314   | 3.1                | 322    | 17       | 314.0    | 3.1      | 0.5          | Single Age   |  |  |  |  |  |  |
| SFB07_42                               | 1200    | 2.54      | 0.3183 | 0.0026          | 0.04382 | 0.00043  | 0.63553 | 280.5 | 2        | 276.4 | 2.6                | 317.1  | 9.3      | 276.4    | 2.6      | 1.5          | Single Age   |  |  |  |  |  |  |

|           |       |        |        |        |         |         |          |       |     |       |     |        |     |        |      |      |            |
|-----------|-------|--------|--------|--------|---------|---------|----------|-------|-----|-------|-----|--------|-----|--------|------|------|------------|
| SFB07_43  | 1710  | 0.59   | 0.2874 | 0.0083 | 0.0367  | 0.0013  | 0.93908  | 256.3 | 6.6 | 232.3 | 8.2 | 517    | 28  | 232.3  | 8.2  | 9.4  | Single Age |
| SFB07_44  | 149.7 | 1.06   | 0.3291 | 0.0045 | 0.04559 | 0.00045 | 0.32197  | 288.7 | 3.4 | 287.4 | 2.8 | 302    | 18  | 287.4  | 2.8  | 0.5  | Single Age |
| SFB07_45  | 267.5 | 8.71   | 0.6101 | 0.0074 | 0.07825 | 0.00086 | 0.71077  | 484   | 4.5 | 485.6 | 5.1 | 470    | 11  | 485.6  | 5.1  | -0.3 | Single Age |
| SFB07_47  | 380   | 5.73   | 0.6242 | 0.0062 | 0.08012 | 0.00081 | 0.48063  | 492.3 | 3.8 | 496.8 | 4.8 | 485    | 15  | 496.8  | 4.8  | -0.9 | Single Age |
| SFB07_48  | 752   | 2.21   | 0.3172 | 0.0035 | 0.04357 | 0.00041 | 0.6724   | 279.7 | 2.7 | 274.9 | 2.5 | 335    | 11  | 274.9  | 2.5  | 1.7  | Single Age |
| SFB07_49  | 150   | 0.64   | 0.3345 | 0.0057 | 0.04555 | 0.00061 | 0.10384  | 292.9 | 4.4 | 287.1 | 3.7 | 363    | 32  | 287.1  | 3.7  | 2.0  | Single Age |
| SFB07_50  | 910   | 2.09   | 0.332  | 0.0067 | 0.0454  | 0.0013  | 0.86243  | 292   | 5.4 | 286   | 7.9 | 355    | 28  | 286.0  | 7.9  | 2.1  | Single Age |
| SFB07_52  | 773   | 2.35   | 0.3333 | 0.0043 | 0.0457  | 0.00054 | 0.65318  | 292   | 3.3 | 288   | 3.3 | 334    | 15  | 288.0  | 3.3  | 1.4  | Single Age |
| SFB07_53  | 67.3  | 1.57   | 0.3496 | 0.0066 | 0.04832 | 0.00073 | 0.15565  | 304.3 | 4.9 | 304.2 | 4.5 | 290    | 35  | 304.2  | 4.5  | 0.0  | Single Age |
| SFB07_54  | 353   | 6.75   | 0.3606 | 0.0077 | 0.0503  | 0.0011  | 0.81777  | 312.4 | 5.8 | 316.5 | 6.5 | 288    | 17  | 316.5  | 6.5  | -1.3 | Single Age |
| SFB07_55  | 1307  | 3.32   | 0.3213 | 0.0027 | 0.04452 | 0.00036 | 0.61301  | 282.9 | 2.1 | 280.8 | 2.2 | 316.8  | 8.4 | 280.8  | 2.2  | 0.7  | Single Age |
| SFB07_56  | 405   | 2.39   | 0.3733 | 0.0064 | 0.04944 | 0.00087 | 0.63068  | 322   | 4.7 | 311   | 5.3 | 399    | 26  | 311.0  | 5.3  | 3.4  | Single Age |
| SFB07_57  | 376   | 0.96   | 0.598  | 0.0066 | 0.078   | 0.001   | 0.76286  | 475.8 | 4.2 | 483.9 | 6.1 | 447    | 15  | 483.9  | 6.1  | -1.7 | Single Age |
| SFB07_58  | 1594  | 1.91   | 0.2902 | 0.004  | 0.03945 | 0.00065 | 0.75152  | 258.7 | 3.1 | 249.4 | 4   | 358    | 17  | 249.4  | 4    | 3.6  | Single Age |
| SFB07_59  | 213.2 | 2.33   | 0.323  | 0.0041 | 0.0447  | 0.00046 | 0.45117  | 284.1 | 3.1 | 281.9 | 2.8 | 309    | 13  | 281.9  | 2.8  | 0.8  | Single Age |
| SFB07_60  | 165.6 | 0.69   | 0.3965 | 0.0068 | 0.05206 | 0.00056 | 0.19998  | 338.9 | 4.9 | 327.1 | 3.5 | 444    | 31  | 327.1  | 3.5  | 3.5  | Single Age |
| SFB07_61  | 1103  | 3.46   | 0.3492 | 0.0084 | 0.04541 | 0.00098 | 0.84595  | 303.8 | 6.3 | 286.2 | 6   | 460    | 21  | 286.2  | 6.0  | 5.8  | Single Age |
| SFB07_62  | 410   | 2.41   | 0.4    | 0.01   | 0.04719 | 0.00068 | 0.62879  | 342.2 | 7.6 | 297.2 | 4.2 | 661    | 38  | DISC   | DISC | 13.2 | Single Age |
| SFB07_64  | 80.3  | 1.12   | 0.751  | 0.016  | 0.0909  | 0.0016  | 0.70493  | 567.9 | 9.3 | 560.9 | 9.5 | 632    | 22  | 560.9  | 9.5  | 1.2  | Single Age |
| SFB07_65  | 348   | 2.23   | 0.3265 | 0.0049 | 0.0443  | 0.0006  | 0.65455  | 286.8 | 3.8 | 279.4 | 3.7 | 303    | 16  | 279.4  | 3.7  | 2.6  | Single Age |
| SFB07_66  | 1084  | 3.16   | 0.3322 | 0.0028 | 0.04582 | 0.00042 | 0.67756  | 291.2 | 2.1 | 288.8 | 2.6 | 304.2  | 9.8 | 288.8  | 2.6  | 0.8  | Single Age |
| SFB07_67  | 61.6  | 1.66   | 0.3288 | 0.007  | 0.04573 | 0.00056 | 0.30931  | 288.4 | 5.4 | 288.2 | 3.5 | 286    | 27  | 288.2  | 3.5  | 0.1  | Single Age |
| SFB07_68  | 181   | 2.21   | 7.14   | 0.22   | 0.3202  | 0.0085  | 0.94592  | 2130  | 27  | 1789  | 42  | 2464   | 14  | DISC   | DISC | 27.4 | Single Age |
| SFB07_69  | 16.96 | 0.99   | 1.059  | 0.021  | 0.1215  | 0.0021  | 0.079429 | 733   | 10  | 739   | 12  | 731    | 27  | 739    | 12.0 | -0.8 | Single Age |
| SFB07_70  | 758   | 2.68   | 0.3776 | 0.0049 | 0.04655 | 0.00075 | 0.82501  | 295.2 | 3.7 | 293.3 | 4.6 | 315    | 8.2 | 293.3  | 4.6  | 0.6  | Single Age |
| SFB07_71  | 181.4 | 119.80 | 0.4626 | 0.0081 | 0.06006 | 0.00087 | 0.034812 | 385.9 | 5.6 | 377.1 | 5.6 | 433    | 25  | 377.1  | 5.6  | 2.3  | Rim        |
| SFB07_71  | 162.3 | 8.43   | 1.185  | 0.037  | 0.096   | 0.0021  | 0.77122  | 793   | 17  | 591   | 12  | 1407   | 24  | DISC   | DISC | 25.5 | Core       |
| SFB07_72  | 287   | 1.47   | 0.3276 | 0.0054 | 0.04457 | 0.00054 | 0.55862  | 287.6 | 4.2 | 281.1 | 3.3 | 358    | 23  | 281.1  | 3.3  | 2.3  | Single Age |
| SFB07_73  | 2017  | 4.40   | 0.5831 | 0.0088 | 0.06938 | 0.00097 | 0.7103   | 466.2 | 5.6 | 432.3 | 5.9 | 644    | 19  | 432.3  | 5.9  | 7.3  | Single Age |
| SFB07_74  | 255   | 2.12   | 1.824  | 0.015  | 0.1798  | 0.0015  | 0.66501  | 1054  | 5.5 | 1066  | 8.2 | 1034.5 | 8.2 | 1034.5 | 8.2  | -3.0 | Single Age |
| SFB07_75  | 545   | 1.57   | 0.3209 | 0.0057 | 0.04338 | 0.0006  | 0.59059  | 282.5 | 4.4 | 273.8 | 3.7 | 330    | 18  | 273.8  | 3.7  | 3.1  | Single Age |
| SFB07_76  | 105.4 | 1.78   | 0.3224 | 0.0045 | 0.04541 | 0.00042 | 0.3808   | 283.6 | 3.4 | 286.3 | 2.6 | 251    | 16  | 286.3  | 2.6  | -1.0 | Single Age |
| SFB07_77  | 603   | 2.34   | 0.3233 | 0.0037 | 0.04441 | 0.00052 | 0.51809  | 284.4 | 2.9 | 280.1 | 3.2 | 315    | 17  | 280.1  | 3.2  | 1.5  | Single Age |
| SFB07_78  | 770   | 1.04   | 0.3029 | 0.0082 | 0.0419  | 0.0013  | 0.89661  | 268.5 | 6.4 | 264.8 | 7.9 | 316    | 14  | 264.8  | 7.9  | 1.4  | Single Age |
| SFB07_79  | 129   | 1.21   | 0.3617 | 0.021  | 0.4731  | 0.0095  | 0.95143  | 2492  | 19  | 2495  | 42  | 2495.9 | 7.9 | 2495.9 | 7.9  | 0.0  | Single Age |
| SFB07_80  | 459   | 1.25   | 0.3529 | 0.0049 | 0.04808 | 0.00059 | 0.55281  | 306.8 | 3.7 | 302.5 | 3.6 | 325    | 18  | 302.7  | 3.6  | 1.3  | Single Age |
| SFB07_81  | 424   | 1.64   | 0.3377 | 0.0039 | 0.04688 | 0.00042 | 0.55451  | 295.4 | 2.9 | 295.3 | 2.6 | 304    | 13  | 295.3  | 2.6  | 0.0  | Single Age |
| SFB07_82  | 743   | 1.11   | 0.3415 | 0.0032 | 0.04038 | 0.00045 | 0.3007   | 298.2 | 2.4 | 255.2 | 2.8 | 643    | 23  | DISC   | DISC | 14.4 | Single Age |
| SFB07_83  | 565   | 2.95   | 0.3535 | 0.0069 | 0.04912 | 0.00093 | 0.89656  | 307.7 | 5.1 | 309.1 | 5.7 | 307    | 12  | 309.1  | 5.7  | -0.5 | Single Age |
| SFB07_84  | 863   | 1.64   | 0.3218 | 0.004  | 0.04467 | 0.00065 | 0.83548  | 289.6 | 3   | 281.7 | 4   | 307    | 12  | 281.7  | 4.0  | 0.7  | Single Age |
| SFB07_85  | 888   | 1.66   | 0.3289 | 0.0044 | 0.04378 | 0.00053 | 0.59721  | 299.2 | 3.4 | 276.2 | 3.3 | 394    | 20  | 276.2  | 3.3  | 4.5  | Single Age |
| SFB07_86  | 105.8 | 1.71   | 0.3274 | 0.0059 | 0.04581 | 0.00051 | 0.28588  | 288   | 4.6 | 288.7 | 3.2 | 304    | 20  | 288.7  | 3.2  | -0.2 | Single Age |
| SFB07_87  | 390   | 1.48   | 0.3514 | 0.0056 | 0.04839 | 0.00069 | 0.72487  | 305.7 | 4.2 | 304.6 | 4.3 | 314    | 14  | 304.6  | 4.3  | 0.4  | Single Age |
| SFB07_88  | 343   | 1.03   | 0.4941 | 0.0043 | 0.06574 | 0.0006  | 0.61694  | 407.6 | 2.9 | 410.4 | 3.6 | 398    | 10  | 410.4  | 3.6  | -0.7 | Single Age |
| SFB07_89  | 1360  | 2.77   | 0.339  | 0.012  | 0.0412  | 0.0012  | 0.79814  | 295.5 | 9.3 | 260.4 | 7.4 | 612    | 39  | DISC   | DISC | 11.9 | Single Age |
| SFB07_90  | 575   | 2.85   | 0.349  | 0.0045 | 0.04828 | 0.00072 | 0.65377  | 303.9 | 3.4 | 303.9 | 4.4 | 316    | 14  | 303.9  | 4.4  | 0.0  | Single Age |
| SFB07_91  | 63    | 0.90   | 0.879  | 0.015  | 0.1059  | 0.0013  | 0.43788  | 640.2 | 8.1 | 648.7 | 7.6 | 601    | 20  | 648.7  | 7.6  | -1.3 | Single Age |
| SFB07_93  | 341   | 5.66   | 0.5955 | 0.0046 | 0.077   | 0.00066 | 0.50056  | 474.6 | 2.9 | 478.2 | 3.9 | 471.3  | 9.8 | 478.2  | 3.9  | -0.8 | Single Age |
| SFB07_94  | 210   | 3.88   | 0.3421 | 0.0045 | 0.04753 | 0.00051 | 0.35427  | 298.6 | 3.4 | 299.3 | 3.1 | 302    | 19  | 299.3  | 3.1  | -0.2 | Single Age |
| SFB07_96  | 206   | 1.91   | 0.3416 | 0.0059 | 0.04702 | 0.0005  | 0.26509  | 298.2 | 4.4 | 296.2 | 3.1 | 310    | 18  | 296.2  | 3.1  | 0.7  | Single Age |
| SFB07_97  | 1264  | 1.19   | 0.2935 | 0.0035 | 0.03814 | 0.00044 | 0.64587  | 261.3 | 2.7 | 241.3 | 2.8 | 394    | 15  | 241.3  | 2.8  | 7.7  | Single Age |
| SFB07_98  | 1890  | 2.38   | 0.233  | 0.016  | 0.0284  | 0.0026  | 0.98071  | 212   | 13  | 180   | 16  | 571    | 72  | DISC   | DISC | 15.1 | Single Age |
| SFB07_100 | 809   | 1.93   | 0.3266 | 0.0072 | 0.04423 | 0.00089 | 0.815    | 286.8 | 5.5 | 279   | 5.5 | 370    | 20  | 279.0  | 5.5  | 2.7  | Single Age |
| SFB07_101 | 638   | 13.30  | 0.5372 | 0.0079 | 0.0693  | 0.0011  | 0.87527  | 437   | 5.1 | 431.9 | 6.9 | 463    | 11  | 431.9  | 6.9  | 1.2  | Single Age |
| SFB07_102 | 759   | 1.52   | 0.3231 | 0.0043 | 0.04474 | 0.00071 | 0.7356   | 284.2 | 3.3 | 282.1 | 4.4 | 313    | 18  | 282.1  | 4.4  | 0.7  | Single Age |
| SFB07_103 | 282   | 0.94   | 0.3504 | 0.0046 | 0.04868 | 0.00056 | 0.35644  | 304.9 | 3.5 | 306.9 | 3.4 | 301    | 14  | 306.9  | 3.4  | -0.7 | Single Age |
| SFB07_104 | 954   | 1.99   | 0.3281 | 0.0039 | 0.04334 | 0.00058 | 0.73322  | 288.1 | 3   | 273.5 | 3.6 | 397    | 10  | 273.5  | 3.6  | 5.1  | Single Age |
| SFB07_105 | 710   | 3.20   | 0.42   | 0.12   | 0.051   | 0.014   | 0.98986  | 349   | 8.2 | 320   | 85  | 562    | 35  | DISC   | DISC | 8.3  | Rim        |
| SFB07_105 | 41.54 | 1.22   | 1.257  | 0.019  | 0.1367  | 0.0018  | 0.36593  | 827.3 | 8.2 | 826   | 10  | 829    | 18  | 826    | 10.0 | 0.2  | Core       |
| SFB07_106 | 246   | 2.23   | 0.3615 | 0.0055 | 0.04958 | 0.00054 | 0.49286  | 313.2 | 4.1 | 311.9 | 3.3 | 335    | 21  | 311.9  | 3.3  | 0.4  | Single Age |
| SFB07_107 | 983   | 2.27   | 0.941  | 0.034  | 0.1031  | 0.0041  | 0.96922  | 672   | 18  | 632   | 24  | 827    | 10  | 632.0  | 24.0 | 6.0  | Single Age |
| SFB07_108 | 390   | 27.30  | 0.601  | 0.04   | 0.0753  | 0.0047  | 0.97589  | 477   | 26  | 468   | 28  | 504    | 23  | 468.0  | 28.0 | 1.9  | Rim        |
| SFB07_108 | 151.1 | 1.09   | 2.133  | 0.03   | 0.1927  | 0.0032  | 0.61285  | 1159  | 9.6 | 1136  | 17  | 1206   | 17  | 1206.0 | 17.0 | 5.8  | Core       |
| SFB07_109 | 251   | 13.67  | 0.415  | 0.0053 | 0.05622 | 0.0007  | 0.56372  | 352.8 | 3.7 | 352.6 | 4.3 | 352    | 13  | 352.6  | 4.3  | 0.1  | Single Age |
| SFB07_110 | 350.5 | 1.69   | 0.3273 | 0.0034 | 0.04533 | 0.00044 | 0.30453  | 287.5 | 2.6 | 285.8 | 2.7 | 289    | 15  | 285.8  | 2.7  | 0.6  | Single Age |
| SFB07_111 | 940   | 1.46   | 0.3259 | 0.0038 | 0.04077 | 0.00056 | 0.67501  | 286.4 | 2.9 | 257.6 | 3.4 | 543    | 15  | DISC   | DISC | 10.1 | Single Age |
| SFB07_112 | 726.6 | 2.40   | 0.3302 | 0.0029 | 0.0456  | 0.00044 | 0.57816  | 289.6 | 2.3 | 287.5 | 2.7 | 303.5  | 9.7 | 287.5  | 2.7  | 0.7  | Single Age |
| SFB07_113 | 477   | 1.13   | 0.34   | 0.0047 | 0.04722 | 0.0007  | 0.6888   | 297   | 3.6 | 297.4 | 4.3 | 291    | 15  | 297.4  | 4.3  | -0.1 | Single Age |
| SFB07_114 | 558   | 7.57   | 0.341  | 0.0041 | 0.04717 | 0.00061 | 0.60239  | 297.8 | 3.1 | 297.1 | 3.7 | 284    | 15  | 297.1  | 3.7  | 0.2  | Single Age |
| SFB07_115 | 533   | 2.43   | 0.3294 | 0.0074 | 0.0448  | 0.0011  | 0.33697  | 288.9 | 5.6 | 282.3 | 6.9 | 336    | 21  | 282.3  | 6.9  | 2.3  | Single Age |
| SFB07_116 | 179.5 | 2.29   | 1.662  | 0.026  | 0.165   | 0.0026  | 0.79512  | 994   | 10  | 987   | 14  | 1003   | 10  | 1003.0 | 10.0 | 1.6  | Single Age |
| SFB07_117 | 475   | 1.34   | 1.086  | 0.025  | 0.1202  | 0.0026  | 0.       |       |     |       |     |        |     |        |      |      |            |

|          |       |        |        |        |         |         |          |       |     |        |     |        |     |        |      |      |            |
|----------|-------|--------|--------|--------|---------|---------|----------|-------|-----|--------|-----|--------|-----|--------|------|------|------------|
| SFB14_3  | 242   | 28.7   | 0.4063 | 0.0089 | 0.0537  | 0.0013  | 0.50578  | 346.1 | 6.4 | 337.2  | 7.8 | 415    | 34  | 337.2  | 7.8  | 2.6  | Rim        |
| SFB14_3  | 114   | 0.763  | 1.865  | 0.021  | 0.1781  | 0.0022  | 0.50698  | 1069  | 7.5 | 1056   | 12  | 1102   | 11  | 1102.0 | 11.0 | 4.2  | Core       |
| SFB14_4  | 99.5  | 1.0568 | 0.7533 | 0.009  | 0.09255 | 0.00089 | 0.32599  | 569.9 | 5.2 | 570.6  | 5.2 | 575    | 18  | 570.6  | 5.2  | -0.1 | Single Age |
| SFB14_5  | 240   | 1.636  | 0.5863 | 0.0069 | 0.07544 | 0.0007  | 0.69002  | 468.3 | 4.4 | 468.8  | 4.2 | 476    | 11  | 468.8  | 4.2  | -0.1 | Single Age |
| SFB14_6  | 1054  | 1.031  | 0.2514 | 0.0057 | 0.0344  | 0.001   | 0.94216  | 227.6 | 4.6 | 218.2  | 6.4 | 320    | 18  | 218.2  | 6.4  | 4.1  | Single Age |
| SFB14_7  | 693   | 2.02   | 0.3101 | 0.0037 | 0.04329 | 0.00025 | 0.59396  | 274.8 | 2.8 | 273.2  | 1.5 | 299    | 12  | 273.2  | 1.5  | 0.6  | Single Age |
| SFB14_8  | 280   | 1.177  | 0.3207 | 0.0056 | 0.04546 | 0.00076 | 0.76589  | 283.1 | 4.5 | 286.6  | 4.7 | 288    | 18  | 286.6  | 4.7  | -1.2 | Single Age |
| SFB14_9  | 1450  | 1.781  | 0.289  | 0.0038 | 0.03979 | 0.00055 | 0.93653  | 257.7 | 3   | 251.5  | 3.4 | 319.6  | 7.6 | 251.5  | 3.4  | 2.4  | Single Age |
| SFB14_10 | 103.5 | 1.856  | 0.8831 | 0.0086 | 0.1063  | 0.00096 | 0.30478  | 642.5 | 4.7 | 651.2  | 5.6 | 624    | 12  | 651.2  | 5.6  | -1.4 | Single Age |
| SFB14_11 | 697   | 2.37   | 0.3111 | 0.005  | 0.04339 | 0.00079 | 0.80447  | 275   | 3.9 | 273.8  | 4.9 | 300    | 15  | 273.8  | 4.9  | 0.4  | Single Age |
| SFB14_12 | 178   | 2.2    | 0.89   | 0.017  | 0.1047  | 0.002   | 0.6484   | 645.6 | 9.2 | 642    | 11  | 664    | 18  | 642.0  | 11.0 | 0.6  | Single Age |
| SFB14_13 | 558   | 5.5    | 0.3123 | 0.0058 | 0.04373 | 0.00079 | 0.84441  | 275.9 | 4.4 | 275.9  | 4.8 | 292    | 12  | 275.9  | 4.8  | 0.0  | Single Age |
| SFB14_14 | 803   | 183    | 0.3414 | 0.0048 | 0.04691 | 0.00051 | 0.34728  | 298.2 | 3.6 | 295.5  | 3.2 | 317    | 15  | 295.5  | 3.2  | 0.9  | Single Age |
| SFB14_15 | 187   | 1.788  | 0.335  | 0.0046 | 0.04684 | 0.00061 | 0.50684  | 293.3 | 3.5 | 295.1  | 3.8 | 295    | 17  | 295.1  | 3.8  | -0.6 | Single Age |
| SFB14_16 | 148   | 1.64   | 1.861  | 0.018  | 0.1829  | 0.0016  | 0.74917  | 1067  | 6.5 | 1082.4 | 8.6 | 1031.1 | 9.6 | 1031.1 | 9.6  | -5.0 | Single Age |
| SFB14_17 | 281   | 2.14   | 0.3315 | 0.0051 | 0.04669 | 0.00051 | 0.79796  | 290.6 | 3.9 | 294.2  | 3.2 | 293    | 20  | 294.2  | 3.2  | -1.2 | Single Age |
| SFB14_18 | 357   | 6.73   | 0.576  | 0.01   | 0.0742  | 0.0012  | 0.67579  | 461.9 | 6.6 | 461.5  | 7.3 | 464    | 17  | 461.5  | 7.3  | 0.1  | Single Age |
| SFB14_19 | 62.9  | 0.654  | 0.3142 | 0.0054 | 0.0443  | 0.00089 | 0.20141  | 277.3 | 4.2 | 279.4  | 5.5 | 298    | 23  | 279.4  | 5.5  | -0.8 | Single Age |
| SFB14_20 | 205.6 | 27.4   | 0.3964 | 0.0049 | 0.05433 | 0.00044 | 0.38945  | 338.9 | 3.6 | 341.1  | 2.7 | 342    | 17  | 341.1  | 2.7  | -0.6 | Single Age |
| SFB14_21 | 229   | 5.66   | 0.648  | 0.024  | 0.0821  | 0.0026  | 0.89963  | 506   | 14  | 509    | 15  | 514    | 20  | 509.0  | 15.0 | -0.6 | Rim        |
| SFB14_21 | 195.9 | 2.297  | 1.497  | 0.043  | 0.1534  | 0.0035  | 0.9375   | 428   | 17  | 920    | 19  | 956    | 16  | 956.0  | 16.0 | 3.8  | Core       |
| SFB14_22 | 375   | 18.7   | 0.578  | 0.011  | 0.0738  | 0.0024  | 0.61423  | 963.4 | 6.8 | 459    | 14  | 466    | 55  | 459.0  | 14.0 | 0.9  | Rim        |
| SFB14_22 | 188.5 | 1.31   | 6.59   | 0.057  | 0.3454  | 0.0026  | 0.7335   | 2058  | 7.6 | 1912   | 12  | 2207   | 7.4 | 2207.0 | 7.4  | 13.4 | Core       |
| SFB14_23 | 474   | 2.89   | 0.3265 | 0.0044 | 0.0458  | 0.00058 | 0.65365  | 286.8 | 3.4 | 288.7  | 3.6 | 285    | 12  | 288.7  | 3.6  | -0.7 | Single Age |
| SFB14_24 | 417   | 2.38   | 0.3222 | 0.0043 | 0.04635 | 0.00066 | 0.45877  | 291.2 | 3.3 | 292    | 4   | 286    | 12  | 292.0  | 4.0  | -0.3 | Single Age |
| SFB14_25 | 97.4  | 0.9386 | 0.5998 | 0.0098 | 0.07332 | 0.00094 | 0.32428  | 457.6 | 6.3 | 456.1  | 5.6 | 485    | 22  | 456.1  | 5.6  | 0.3  | Single Age |
| SFB14_26 | 106.6 | 1.342  | 0.3159 | 0.0044 | 0.04421 | 0.00038 | 0.13342  | 278.7 | 3.4 | 278.8  | 2.3 | 276    | 19  | 278.8  | 2.3  | 0.0  | Single Age |
| SFB14_27 | 173.2 | 1.395  | 0.377  | 0.0055 | 0.05172 | 0.00048 | 0.4803   | 324.7 | 4.1 | 325.1  | 2.9 | 325    | 15  | 325.1  | 2.9  | -0.1 | Single Age |
| SFB14_28 | 940   | 52     | 0.417  | 0.017  | 0.0558  | 0.002   | 0.93439  | 353   | 12  | 350    | 12  | 376    | 17  | 350.0  | 12.0 | 0.8  | Rim        |
| SFB14_28 | 108.6 | 2.467  | 2.109  | 0.052  | 0.1604  | 0.003   | 0.84383  | 1154  | 18  | 959    | 17  | 1540   | 17  | DISC   | DISC | 37.7 | Core       |
| SFB14_29 | 159   | 6.1    | 0.635  | 0.043  | 0.0801  | 0.0048  | 0.9775   | 495   | 27  | 496    | 28  | 503    | 24  | 496.0  | 28.0 | -0.2 | Single Age |
| SFB14_30 | 176   | 5.19   | 0.5668 | 0.007  | 0.07328 | 0.00075 | 0.73623  | 455.7 | 4.5 | 456.5  | 4.4 | 445.6  | 9.2 | 456.5  | 4.4  | -0.2 | Single Age |
| SFB14_31 | 234.1 | 1.395  | 0.55   | 0.011  | 0.0712  | 0.0016  | 0.92512  | 445   | 7.5 | 443.5  | 9.8 | 467.7  | 9.2 | 443.5  | 9.8  | 0.3  | Single Age |
| SFB14_32 | 381   | 3.029  | 0.715  | 0.013  | 0.0887  | 0.0017  | 0.9123   | 547.4 | 7.7 | 549    | 10  | 547    | 10  | 548.0  | 10.0 | -0.1 | Single Age |
| SFB14_33 | 123   | 3.48   | 0.6944 | 0.0091 | 0.08663 | 0.00097 | 0.38781  | 536.2 | 5.6 | 535.5  | 5.7 | 543    | 14  | 535.5  | 5.7  | 0.1  | Single Age |
| SFB14_33 | 35.7  | 1.719  | 3.834  | 0.043  | 0.0805  | 0.0013  | 0.48352  | 159.9 | 9.1 | 490.1  | 7.7 | 3682   | 14  | DISC   | DISC | 68.8 | Single Age |
| SFB14_34 | 497   | 2.77   | 0.3318 | 0.0058 | 0.04603 | 0.00078 | 0.82423  | 290.8 | 4.4 | 290.1  | 4.8 | 289.2  | 9.6 | 290.1  | 4.8  | 0.2  | Single Age |
| SFB14_35 | 497   | 2.77   | 0.3318 | 0.0058 | 0.04603 | 0.00078 | 0.82423  | 290.8 | 4.4 | 290.1  | 4.8 | 289.2  | 9.6 | 290.1  | 4.8  | 0.2  | Single Age |
| SFB14_36 | 102.7 | 0.954  | 0.3206 | 0.0041 | 0.04518 | 0.00047 | 0.048873 | 282.3 | 3.1 | 284.8  | 2.9 | 280    | 21  | 284.8  | 2.9  | -0.9 | Single Age |
| SFB14_37 | 647   | 5.89   | 0.2738 | 0.0023 | 0.03863 | 0.00024 | 0.13891  | 245.7 | 1.9 | 244.3  | 1.5 | 270    | 13  | 244.3  | 1.5  | 0.6  | Single Age |
| SFB14_38 | 565.1 | 1.467  | 0.2892 | 0.004  | 0.04024 | 0.00045 | 0.63097  | 257.9 | 3.2 | 254.3  | 2.8 | 289    | 13  | 254.3  | 2.8  | 1.4  | Single Age |
| SFB14_39 | 111.9 | 1.636  | 0.3596 | 0.0051 | 0.05032 | 0.00066 | 0.50384  | 311.8 | 3.8 | 316.4  | 4.1 | 315    | 18  | 316.4  | 4.1  | -1.5 | Single Age |
| SFB14_40 | 196.9 | 3.18   | 0.5683 | 0.0072 | 0.07386 | 0.00066 | 0.51653  | 456.8 | 4.6 | 459.3  | 3.9 | 457    | 14  | 459.3  | 3.9  | -0.5 | Single Age |
| SFB14_41 | 200   | 1.91   | 0.3563 | 0.0053 | 0.04956 | 0.00048 | 0.34693  | 309.3 | 4   | 311.8  | 3   | 334    | 36  | 311.8  | 3.0  | -0.8 | Single Age |
| SFB14_42 | 354.3 | 10.4   | 0.5475 | 0.0083 | 0.06875 | 0.00059 | 0.3727   | 443.1 | 5.4 | 428.6  | 3.6 | 520    | 29  | 428.6  | 3.6  | 3.3  | Single Age |
| SFB14_43 | 200   | 1.227  | 0.3222 | 0.0063 | 0.04362 | 0.00052 | 0.20356  | 283.4 | 4.8 | 275.2  | 3.2 | 333    | 43  | 275.2  | 3.2  | 2.9  | Single Age |
| SFB14_44 | 247.6 | 3.02   | 5.909  | 0.079  | 0.3303  | 0.0051  | 0.39161  | 1962  | 11  | 1840   | 25  | 2096   | 39  | 2096.0 | 39.0 | 12.2 | Single Age |
| SFB14_45 | 319   | 9.4    | 0.553  | 0.014  | 0.0729  | 0.0014  | 0.71553  | 446.8 | 9.1 | 453.6  | 8.2 | 465    | 33  | 453.6  | 8.2  | -1.5 | Single Age |
| SFB14_46 | 87.7  | 0.96   | 0.3578 | 0.0085 | 0.0506  | 0.00082 | 0.24895  | 310.4 | 6.3 | 318.2  | 5   | 261    | 59  | 318.2  | 5.0  | -2.5 | Single Age |
| SFB14_47 | 130   | 0.54   | 0.207  | 0.02   | 0.0227  | 0.0039  | 0.53429  | 191   | 17  | 145    | 25  | 860    | 350 | DISC   | DISC | 24.1 | Rim        |
| SFB14_47 | 55.69 | 1.526  | 0.307  | 0.0098 | 0.04118 | 0.00069 | 0.02848  | 271.5 | 7.6 | 260.1  | 4.3 | 334    | 79  | 260.1  | 4.3  | 4.2  | Core       |
| SFB14_48 | 54    | 0.555  | 0.1806 | 0.0096 | 0.02607 | 0.00073 | 0.15484  | 169.2 | 7.9 | 165.9  | 4.6 | 270    | 120 | 165.9  | 4.6  | 2.0  | Single Age |
| SFB14_49 | 368   | 45.8   | 0.4002 | 0.0057 | 0.05369 | 0.00081 | 0.32402  | 341.7 | 4.1 | 337.1  | 5   | 373    | 37  | 337.1  | 5.0  | 1.3  | Rim        |
| SFB14_49 | 354   | 3.98   | 0.5691 | 0.0074 | 0.07308 | 0.0006  | 0.35116  | 457.3 | 4.8 | 454.7  | 3.6 | 484    | 29  | 454.7  | 3.6  | 0.6  | Core       |
| SFB14_50 | 392   | 2.29   | 0.341  | 0.0038 | 0.04745 | 0.00041 | 0.57025  | 297.8 | 2.9 | 298.8  | 2.5 | 307    | 24  | 298.8  | 2.5  | -0.3 | Single Age |
| SFB14_51 | 1049  | 1.843  | 0.3196 | 0.0031 | 0.04436 | 0.00037 | 0.63287  | 281.6 | 2.4 | 279.8  | 2.3 | 301    | 17  | 279.8  | 2.3  | 0.6  | Single Age |
| SFB14_52 | 370.9 | 3.41   | 0.8278 | 0.0076 | 0.099   | 0.00094 | 0.41548  | 612.2 | 4.2 | 608.5  | 5.5 | 636    | 21  | 608.5  | 5.5  | 0.6  | Single Age |
| SFB14_53 | 2150  | 1.52   | 0.277  | 0.03   | 0.0343  | 0.0029  | 0.92445  | 248   | 24  | 217    | 18  | 555    | 97  | DISC   | DISC | 12.5 | Rim        |
| SFB14_53 | 283   | 1.673  | 0.3547 | 0.0055 | 0.04898 | 0.00052 | 0.27688  | 308.1 | 4.1 | 308.3  | 3.2 | 312    | 39  | 308.3  | 3.2  | -0.1 | Core       |
| SFB14_54 | 1323  | 1.52   | 0.2053 | 0.0065 | 0.02551 | 0.00064 | 0.22223  | 187.8 | 4.4 | 162.3  | 4   | 550    | 49  | DISC   | DISC | 13.6 | Single Age |
| SFB14_55 | 199   | 21.2   | 0.451  | 0.014  | 0.0537  | 0.001   | 0.44089  | 378   | 10  | 336.9  | 6.3 | 649    | 58  | DISC   | DISC | 10.9 | Single Age |
| SFB14_56 | 215.8 | 0.7823 | 0.3177 | 0.0039 | 0.04403 | 0.00042 | 0.16953  | 280   | 3   | 278.1  | 2.7 | 287    | 33  | 278.1  | 2.7  | 0.7  | Single Age |
| SFB14_57 | 297   | 11.65  | 0.5561 | 0.0051 | 0.07151 | 0.00045 | 0.13018  | 448.9 | 3.3 | 445.2  | 2.7 | 482    | 22  | 445.2  | 2.7  | 0.8  | Single Age |
| SFB14_58 | 230   | 4.21   | 0.5494 | 0.006  | 0.07086 | 0.00083 | 0.26632  | 444.4 | 4   | 441.3  | 5   | 468    | 31  | 441.3  | 5.0  | 0.7  | Single Age |
| SFB14_59 | 559   | 16.5   | 0.488  | 0.024  | 0.0653  | 0.0029  | 0.91454  | 403   | 16  | 408    | 17  | 390    | 45  | 408.0  | 17.0 | -1.2 | Rim        |
| SFB14_59 | 553   | 1.666  | 0.7993 | 0.0098 | 0.096   | 0.0013  | 0.57881  | 596.3 | 5.5 | 591.1  | 7.4 | 629    | 29  | 591.1  | 7.4  | 0.9  | Rim        |
| SFB14_59 | 371   | 1.181  | 0.927  | 0.014  | 0.11    | 0.0015  | 0.56825  | 666.1 | 7.4 | 672.5  | 8.8 | 663    | 26  | 672.5  | 8.8  | -1.0 | Core       |
| SFB14_60 | 64    | 0.2663 | 0.776  | 0.013  | 0.03821 | 0.00066 | 0.11352  | 583.8 | 7.2 | 241.7  | 4.1 | 2314   | 38  | DISC   | DISC | 58.6 | Single Age |
| SFB14_61 | 412   | 8.35   | 0.556  | 0.0062 | 0.07213 | 0.0005  | 0.83839  | 448.8 | 4   | 449    | 3   | 455    | 19  | 449.0  | 3.0  | 0.0  | Single Age |
| SFB14_62 | 360   | 14.7   | 0.4051 | 0.0056 | 0.05508 | 0.00072 | 0.23382  | 345.2 | 4   | 345.6  | 4.4 | 339    | 38  | 345.6  | 4.4  | -0.1 | Rim        |
| SFB14_62 | 275.2 | 3.36   | 0.679  | 0.017  | 0.0842  | 0.0014  | 0.8511   | 526   | 10  | 521.4  | 8.2 | 528    | 33  | 521.4  | 8.2  | 0.9  | Core       |
| SFB14_63 | 583   | 1.378  | 0.3223 | 0.0037 | 0.04427 | 0.00035 | 0.43822  | 283.6 | 2.8 |        |     |        |     |        |      |      |            |

|           |       |       |        |        |         |         |          |       |     |       |     |      |     |        |      |      |            |
|-----------|-------|-------|--------|--------|---------|---------|----------|-------|-----|-------|-----|------|-----|--------|------|------|------------|
| SFB14_99  | 922   | 1.519 | 0.3103 | 0.004  | 0.04206 | 0.00044 | 0.70498  | 275.2 | 3.1 | 265.6 | 2.7 | 335  | 24  | 265.6  | 2.7  | 3.5  | Single Age |
| SFB14_100 | 1250  | 7.8   | 0.3215 | 0.0043 | 0.04429 | 0.00045 | 0.54032  | 282.9 | 3.3 | 279.3 | 2.8 | 321  | 23  | 279.3  | 2.8  | 1.3  | Single Age |
| SFB14_101 | 705   | 1.571 | 0.3573 | 0.0032 | 0.04869 | 0.00039 | 0.5557   | 310.1 | 2.4 | 306.5 | 2.4 | 339  | 19  | 306.5  | 2.4  | 1.2  | Single Age |
| SFB14_102 | 181.2 | 1.535 | 0.3324 | 0.0059 | 0.04592 | 0.0006  | 0.18391  | 291.2 | 4.5 | 289.4 | 3.7 | 296  | 40  | 289.4  | 3.7  | 0.6  | Single Age |
| SFB14_103 | 484   | 1.951 | 0.3351 | 0.004  | 0.04635 | 0.0004  | 0.36097  | 293.4 | 3   | 292.1 | 2.4 | 298  | 27  | 292.1  | 2.4  | 0.4  | Single Age |
| SFB14_104 | 231.6 | 0.688 | 0.3622 | 0.0048 | 0.04986 | 0.00041 | 0.046555 | 313.7 | 3.6 | 314.2 | 2.4 | 305  | 30  | 314.2  | 2.4  | -0.2 | Single Age |
| SFB14_105 | 832   | 2.534 | 0.3416 | 0.0026 | 0.0466  | 0.00027 | 0.34558  | 298.3 | 2   | 293.6 | 1.7 | 322  | 21  | 293.6  | 1.7  | 1.6  | Single Age |
| SFB14_106 | 59    | 0.73  | 0.775  | 0.022  | 0.0946  | 0.0024  | 0.49335  | 582   | 12  | 583   | 14  | 585  | 55  | 583.0  | 14.0 | -0.2 | Single Age |
| SFB14_107 | 207   | 3.11  | 0.3924 | 0.0066 | 0.05406 | 0.00045 | 0.093656 | 335.9 | 4.8 | 339.4 | 2.8 | 317  | 38  | 339.4  | 2.8  | -1.0 | Single Age |
| SFB14_108 | 333.3 | 1.057 | 0.3075 | 0.0046 | 0.04239 | 0.00047 | 0.47023  | 272.1 | 3.6 | 267.6 | 2.9 | 302  | 36  | 267.6  | 2.9  | 1.7  | Single Age |
| SFB14_109 | 682   | 0.689 | 0.2987 | 0.0067 | 0.03972 | 0.00084 | 0.89345  | 265.3 | 5.3 | 251.1 | 5.2 | 404  | 24  | 251.1  | 5.2  | 5.4  | Single Age |
| SFB14_110 | 54.8  | 1.782 | 0.3067 | 0.0078 | 0.04223 | 0.00062 | 0.13759  | 271.3 | 6   | 266.6 | 3.8 | 314  | 72  | 266.6  | 3.8  | 1.7  | Single Age |
| SFB14_111 | 289.2 | 2.76  | 8.29   | 0.2    | 0.371   | 0.0074  | 0.54712  | 2261  | 22  | 2033  | 35  | 2470 | 13  | 2470.0 | 13.0 | 17.7 | Single Age |
| SFB14_112 | 248   | 1.56  | 1.905  | 0.029  | 0.1837  | 0.0024  | 0.84158  | 1085  | 9.9 | 1087  | 13  | 1092 | 15  | 1092.0 | 15.0 | 0.5  | Single Age |
| SFB14_113 | 647   | 2.88  | 0.3033 | 0.0034 | 0.04201 | 0.00031 | 0.49268  | 268.9 | 2.7 | 265.3 | 1.9 | 295  | 23  | 265.3  | 1.9  | 1.3  | Single Age |
| SFB14_114 | 170.4 | 1.365 | 1.052  | 0.015  | 0.1134  | 0.0015  | 0.55515  | 729.7 | 7.5 | 692.2 | 8.6 | 840  | 31  | 692.2  | 8.6  | 5.1  | Single Age |
| SFB14_115 | 672   | 1.353 | 0.5737 | 0.0083 | 0.07019 | 0.00099 | 0.75524  | 460.2 | 5.3 | 437.3 | 6   | 573  | 18  | 437.3  | 6.0  | 5.0  | Single Age |
| SFB14_116 | 798   | 14.1  | 0.35   | 0.006  | 0.04732 | 0.00082 | 0.61602  | 304.7 | 4.5 | 298   | 5.1 | 344  | 32  | 298.0  | 5.1  | 2.2  | Rim        |
| SFB14_116 | 180.5 | 4.03  | 0.546  | 0.011  | 0.0702  | 0.0011  | 0.36399  | 442.7 | 7.2 | 437.3 | 6.6 | 414  | 47  | 437.3  | 6.6  | 1.1  | Core       |
| SFB14_117 | 250   | 1.71  | 0.3224 | 0.0048 | 0.04428 | 0.00049 | 0.46029  | 284.1 | 3.6 | 279.3 | 3   | 307  | 29  | 279.3  | 3.0  | 1.7  | Single Age |
| SFB14_118 | 218   | 2.187 | 0.3372 | 0.0048 | 0.04747 | 0.00041 | 0.25413  | 294.9 | 3.6 | 298.9 | 2.5 | 290  | 31  | 298.9  | 2.5  | -1.4 | Single Age |
| SFB14_119 | 133.2 | 1.43  | 0.717  | 0.011  | 0.0883  | 0.0012  | 0.56873  | 548.8 | 6.8 | 545.5 | 7.2 | 579  | 31  | 545.5  | 7.2  | 0.6  | Single Age |
| SFB14_120 | 99.3  | 72    | 0.316  | 0.024  | 0.0396  | 0.0019  | 0.6146   | 278   | 19  | 250   | 12  | 600  | 130 | DISC   | DISC | 10.1 | Rim        |
| SFB14_120 | 276   | 3.31  | 0.79   | 0.019  | 0.0926  | 0.0016  | 0.81895  | 590   | 11  | 570.5 | 9.1 | 699  | 27  | 570.5  | 9.1  | 3.3  | Core       |

| Sample Name:                     |       | 09-SFB-49 |          |                 |          |          |          |          |                    |          |          |       |          |          |          |              |              |  |
|----------------------------------|-------|-----------|----------|-----------------|----------|----------|----------|----------|--------------------|----------|----------|-------|----------|----------|----------|--------------|--------------|--|
| Upper Marine Molasse (19 ± 1 Ma) |       |           |          | Isotopic Ratios |          |          |          |          | Apparent Ages (Ma) |          |          |       |          |          |          |              |              |  |
|                                  | U     | U/Th      | 207Pb    | 2σ error        | 206Pb    | 2σ error | Error    | 207Pb    | 2σ error           | 206Pb    | 2σ error | 207Pb | 2σ error | Best age | 2σ error | Discordance* | Rim, Core or |  |
| Grain #                          | (ppm) |           | 235U     | (abs.)          | 238U     | (abs.)   | Corr.    | 235U     | (Ma)               | 238U     | (Ma)     | 206Pb | (Ma)     | (Ma)     | (Ma)     | %            | Single Age   |  |
| SFB49_05                         | 122   | 2.293     | 0.708    | 0.011           | 0.08653  | 0.00095  | 0.006765 | 543.2    | 6.3                | 535      | 5.6      | 585   | 38       | 535.0    | 5.6      | 1.5          | Single Age   |  |
| SFB49_09                         | 446   | 2.78      | 0.3496   | 0.0062          | 0.04517  | 0.00054  | 0.38204  | 304.9    | 4.6                | 284.8    | 3.3      | 461   | 37       | 284.8    | 3.3      | 6.6          | Single Age   |  |
| SFB49_13                         | 61.5  | 0.998     | 1.188    | 0.067           | 0.04939  | 0.0009   | 0.32398  | 786      | 30                 | 310.8    | 5.5      | 2553  | 87       | DISC     | DISC     | 60.5         | Single Age   |  |
| SFB49_15                         | 28.8  | 0.934     | 1.478    | 0.07            | 0.0518   | 0.0011   | 0.39248  | 915      | 27                 | 325.6    | 6.9      | 2886  | 73       | DISC     | DISC     | 64.4         | Single Age   |  |
| SFB49_16                         | 1320  | 7.13      | 0.2761   | 0.0095          | 0.0287   | 0.0014   | 0.077364 | 247.5    | 7.6                | 182.4    | 8.5      | 980   | 140      | DISC     | DISC     | 26.3         | Rim          |  |
| SFB49_16                         | 403.5 | 2.013     | 0.3416   | 0.0033          | 0.04607  | 0.00036  | 0.10925  | 298.3    | 2.5                | 290.7    | 2.2      | 352   | 25       | 290.7    | 2.2      | 2.5          | Core         |  |
| SFB49_21                         | 212   | 3.75      | 0.55     | 0.0059          | 0.07133  | 0.00079  | 0.43163  | 444.9    | 3.9                | 444.1    | 4.7      | 431   | 29       | 444.1    | 4.7      | 0.2          | Single Age   |  |
| SFB49_23                         | 656   | 1.41      | 0.3362   | 0.0045          | 0.04571  | 0.00056  | 0.52699  | 294.2    | 3.4                | 288.1    | 3.4      | 338   | 26       | 288.1    | 3.4      | 2.1          | Single Age   |  |
| SFB49_24                         | 1162  | 1.497     | 0.2978   | 0.0028          | 0.04078  | 0.00037  | 0.63948  | 264.6    | 2.2                | 257.7    | 2.3      | 316   | 19       | 257.7    | 2.3      | 2.6          | Single Age   |  |
| SFB49_30                         | 1655  | 23.38     | 0.402    | 0.0032          | 0.05332  | 0.00043  | 0.56641  | 343      | 2.3                | 334.9    | 2.6      | 397   | 15       | 334.9    | 2.6      | 2.4          | Single Age   |  |
| SFB49_31                         | 502   | 2.87      | 0.3781   | 0.0055          | 0.04954  | 0.00059  | 0.068103 | 325.6    | 4.1                | 311.7    | 3.6      | 428   | 34       | 311.7    | 3.6      | 4.3          | Single Age   |  |
| SFB49_32                         | 1448  | 4.16      | 0.621    | 0.024           | 0.0742   | 0.0023   | 0.92893  | 490      | 15                 | 461      | 14       | 631   | 31       | 461.0    | 14.0     | 5.9          | Single Age   |  |
| SFB49_33                         | 483.9 | 3.08      | 0.3352   | 0.0037          | 0.04619  | 0.00032  | 0.098328 | 293.5    | 2.8                | 291.1    | 2        | 299   | 30       | 291.1    | 2.0      | 0.8          | Single Age   |  |
| SFB49_34                         | 204   | 0.851     | 0.3681   | 0.0043          | 0.04992  | 0.00039  | 0.14694  | 318.2    | 3.2                | 314      | 2.4      | 341   | 27       | 314.0    | 2.4      | 1.3          | Single Age   |  |
| SFB49_35                         | 356   | 1.962     | 0.3251   | 0.0042          | 0.04439  | 0.0004   | 0.14928  | 285.7    | 3.2                | 280      | 2.5      | 323   | 33       | 280.0    | 2.5      | 2.0          | Single Age   |  |
| SFB49_36                         | 473   | 3.06      | 0.3714   | 0.0062          | 0.05046  | 0.00043  | 0.012912 | 320.5    | 4.4                | 317.3    | 2.7      | 319   | 22       | 317.3    | 2.7      | 1.0          | Single Age   |  |
| SFB49_41                         | 156.4 | 2.489     | 0.815    | 0.023           | 0.054    | 0.0017   | 0.46807  | 604      | 13                 | 339      | 10       | 1788  | 52       | DISC     | DISC     | 43.9         | Single Age   |  |
| SFB49_47                         | 316.2 | 2.018     | 0.327    | 0.0041          | 0.04544  | 0.00043  | 0.18505  | 287.2    | 3.2                | 286.5    | 2.6      | 284   | 31       | 286.5    | 2.6      | 0.2          | Single Age   |  |
| SFB49_50                         | 75.4  | 1.334     | 1.206    | 0.04            | 0.0487   | 0.001    | 0.036226 | 802      | 18                 | 306.2    | 6.4      | 2647  | 55       | DISC     | DISC     | 61.8         | Single Age   |  |
| SFB49_51                         | 71.3  | 1.447     | 1.771    | 0.026           | 0.1729   | 0.0018   | 0.53142  | 1034     | 9.4                | 1027.8   | 9.8      | 1066  | 24       | 1066.0   | 24.0     | 3.6          | Single Age   |  |
| SFB49_53                         | 220   | 0.995     | 0.3321   | 0.0065          | 0.04526  | 0.00046  | 0.62613  | 291      | 4.9                | 285.3    | 2.9      | 338   | 36       | 285.3    | 2.9      | 2.0          | Single Age   |  |
| SFB49_54                         | 109.1 | 21.67     | 1.052    | 0.028           | 0.04628  | 0.00073  | 0.54135  | 729      | 13                 | 291.6    | 4.5      | 2510  | 39       | DISC     | DISC     | 60.0         | Single Age   |  |
| SFB49_56                         | 1356  | 1.041     | 0.3149   | 0.0036          | 0.04306  | 0.00041  | 0.7038   | 277.9    | 2.8                | 271.7    | 2.5      | 324   | 19       | 271.7    | 2.5      | 2.2          | Single Age   |  |
| SFB49_59                         | 280   | 1.865     | 0.3442   | 0.0091          | 0.04711  | 0.00062  | 0.005017 | 300.1    | 6.8                | 296.8    | 3.8      | 332   | 67       | 296.8    | 3.8      | 1.1          | Single Age   |  |
| SFB49_64                         | 1873  | 1.961     | 0.3      | 0.01            | 0.02797  | 0.00095  | 0.6508   | 267.7    | 8.2                | 177.8    | 6        | 1150  | 63       | DISC     | DISC     | 33.6         | Single Age   |  |
| SFB49_65                         | 853   | 1.008     | 0.3284   | 0.0038          | 0.04546  | 0.00043  | 0.43031  | 288.2    | 2.9                | 286.6    | 2.7      | 309   | 19       | 286.6    | 2.7      | 0.6          | Single Age   |  |
| SFB49_68                         | 233   | 3.17      | 0.67     | 0.016           | 0.0806   | 0.0012   | 0.48671  | 520      | 9.7                | 499.5    | 7.1      | 620   | 40       | 499.5    | 7.1      | 3.9          | Single Age   |  |
| SFB49_72                         | 83.1  | 4.24      | 0.987    | 0.06            | 0.04487  | 0.00092  | 0.65043  | 690      | 29                 | 282.9    | 5.7      | 2422  | 83       | DISC     | DISC     | 59.0         | Single Age   |  |
| SFB49_73                         | 288   | 0.765     | 0.816    | 0.012           | 0.0964   | 0.0012   | 0.41437  | 605.5    | 7                  | 593.2    | 6.9      | 663   | 31       | 593.2    | 6.9      | 2.0          | Single Age   |  |
| SFB49_74                         | 30.27 | 0.2158    | 1.46     | 0.041           | 0.0545   | 0.0013   | 0.52098  | 914      | 17                 | 342.1    | 7.9      | 2787  | 44       | DISC     | DISC     | 62.6         | Single Age   |  |
| SFB49_75                         | 539   | 1.493     | 0.4213   | 0.0064          | 0.04652  | 0.00047  | 0.24632  | 356.9    | 4.6                | 293.1    | 2.9      | 805   | 36       | DISC     | DISC     | 17.9         | Single Age   |  |
| SFB49_77                         | 676   | 27.2      | 0.433    | 0.011           | 0.055    | 0.002    | 0.50141  | 365      | 8                  | 345      | 12       | 478   | 73       | 345.0    | 12.0     | 5.5          | Rim          |  |
| SFB49_77                         | 368   | 0.807     | 0.846    | 0.011           | 0.0972   | 0.0014   | 0.40637  | 622.4    | 6.1                | 598      | 8.1      | 708   | 33       | 598.0    | 8.1      | 3.9          | Core         |  |
| SFB49_85                         | 2920  | 2.28      | 0.282    | 0.012           | 0.026    | 0.0011   | 0.64626  | 252.2    | 9.8                | 165.3    | 7.1      | 1224  | 61       | DISC     | DISC     | 34.5         | Rim          |  |
| SFB49_85                         | 297   | 1.55      | 0.5165   | 0.0067          | 0.0646   | 0.00094  | 0.26327  | 422.7    | 4.5                | 403.5    | 5.7      | 530   | 37       | 403.5    | 5.7      | 4.5          | Core         |  |
| SFB49_87                         | 30    | 0.1982    | 1.35     | 0.039           | 0.0471   | 0.0012   | 0.17361  | 865      | 17                 | 296.5    | 7.5      | 2891  | 54       | DISC     | DISC     | 65.7         | Single Age   |  |
| SFB49_88                         | 532   | 1.227     | 0.2853   | 0.0075          | 0.03951  | 0.00082  | 0.64553  | 254.7    | 5.9                | 249.8    | 5.1      | 313   | 47       | 249.8    | 5.1      | 1.9          | Single Age   |  |
| SFB49_89                         | 443   | 3.91      | 0.5487   | 0.0098          | 0.0705   | 0.0012   | 0.5252   | 444      | 6.4                | 439      | 7.1      | 456   | 35       | 439.0    | 7.1      | 1.1          | Rim          |  |
| SFB49_89                         | 375   | 0.9034    | 0.996    | 0.013           | 0.1116   | 0.001    | 0.098082 | 701.5    | 6.7                | 682.2    | 6.1      | 748   | 34       | 682.2    | 6.1      | 2.8          | Core         |  |
| SFB49_92                         | 141.9 | 2.68      | 0.577    | 0.011           | 0.0725   | 0.0011   | 0.23622  | 461.9    | 7.2                | 450.8    | 6.4      | 502   | 42       | 450.8    | 6.4      | 2.4          | Single Age   |  |
| SFB49_93                         | 182.4 | 1.891     | 0.9      | 0.033           | 0.049    | 0.0015   | 0.41168  | 650      | 18                 | 308.5    | 9.1      | 2134  | 39       | DISC     | DISC     | 52.5         | Single Age   |  |
| SFB49_99                         | 1917  | 1.487     | 0.3046   | 0.0027          | 0.04186  | 0.00037  | 0.61155  | 270      | 21                 | 264.3    | 2.3      | 323   | 18       | 264.3    | 2.3      | 2.1          | Single Age   |  |
| SFB49_104                        | 300.5 | 1.684     | 0.3341   | 0.0044          | 0.04619  | 0.00034  | 0.21329  | 292.6    | 3.4                | 291.1    | 2.1      | 301   | 31       | 291.1    | 2.1      | 0.5          | Single Age   |  |
| SFB49_105                        | 892   | 0.648     | 0.624    | 0.018           | 0.074    | 0.0023   | 0.939    | 491      | 11                 | 460      | 14       | 651   | 22       | 460.0    | 14.0     | 6.3          | Single Age   |  |
| SFB49_106                        | 530   | 1.273     | 0.3267   | 0.0059          | 0.04262  | 0.0006   | 0.1788   | 287      | 4.5                | 269      | 3.7      | 426   | 37       | 269.0    | 3.7      | 6.3          | Single Age   |  |
| SFB49_107                        | 851   | 1.77      | 1.312    | 0.029           | 0.1302   | 0.0025   | 0.90911  | 850      | 13                 | 789      | 15       | 1010  | 19       | 789.0    | 15.0     | 7.2          | Single Age   |  |
| SFB49_110                        | 189   | 1.114     | 0.594    | 0.01            | 0.07587  | 0.00074  | 0.13022  | 473.3    | 6.5                | 471.4    | 4.4      | 490   | 34       | 471.4    | 4.4      | 0.4          | Single Age   |  |
| SFB49_119                        | 44.5  | 0.772     | 1.523    | 0.045           | 0.0467   | 0.0012   | 0.27642  | 937      | 18                 | 294.1    | 7.6      | 3112  | 51       | DISC     | DISC     | 68.6         | Single Age   |  |
| SFB49_120                        | 101.9 | 0.734     | 1.314    | 0.043           | 0.05584  | 0.00077  | 0.55896  | 851      | 19                 | 350.2    | 4.7      | 2556  | 45       | DISC     | DISC     | 58.8         | Single Age   |  |
| SFB49_2_1                        | 367   | 4.72      | 0.5338   | 0.0095          | 0.0683   | 0.0012   | 0.28768  | 433.9    | 6.2                | 426      | 7.2      | 488   | 29       | 426.0    | 7.2      | 1.8          | Single Age   |  |
| SFB49_2_7                        | 106.9 | 0.2841    | 0.407    | 0.01            | 0.0526   | 0.00079  | 0.13215  | 345.8    | 7.3                | 330.4    | 4.8      | 442   | 52       | 330.4    | 4.8      | 4.5          | Single Age   |  |
| SFB49_2_8                        | 85.1  | 0.973     | 1.698    | 0.023           | 0.1652   | 0.0018   | 0.007856 | 1007     | 8.6                | 985.4    | 9.8      | 1049  | 23       | 1049.0   | 23.0     | 6.1          | Single Age   |  |
| SFB49_2_14                       | 556   | 1.227     | 0.3032   | 0.0059          | 0.0406   | 0.00088  | 0.58361  | 269.1    | 4.7                | 256.5    | 5.4      | 315   | 43       | 256.5    | 5.4      | 4.7          | Single Age   |  |
| SFB49_2_16                       | 88.3  | 0.731     | 0.3659   | 0.0072          | 0.05057  | 0.00068  | 0.098271 | 316.2    | 5.4                | 318      | 4.2      | 306   | 45       | 318.0    | 4.2      | 0.6          | Single Age   |  |
| SFB49_2_23                       | 11.39 | 0.99      | no value | NAN             | no value | NAN      | #VALUE!  | no value | NAN                | no value | NAN      | 4426  | 46       | #VALUE!  | #VALUE!  | #VALUE!      | Single Age   |  |
| SFB49_2_41                       | 325   | 1.571     | 0.3436   | 0.0047          | 0.0476   | 0.00047  | 0.43578  | 299.8    | 3.5                | 299.8    | 2.9      | 302   | 29       | 299.8    | 2.9      | 0.0          | Single Age   |  |
| SFB49_2_43                       | 975   | 10.2      | 0.593    | 0.012           | 0.0757   | 0.0015   | 0.65382  | 472.7    | 7.7                | 470.6    | 8.8      | 500   | 32       | 470.6    | 8.8      | 0.4          | Rim          |  |
| SFB49_2_43                       | 136.3 | 0.582     | 0.931    | 0.014           | 0.1091   | 0.0012   | 0.52989  | 668      | 7.2                | 667.8    | 7.2      | 672   | 31       | 667.8    | 7.2      | 0.0          | Core         |  |
| SFB49_2_45                       | 287   | 1.321     | 0.3881   | 0.0043          | 0.05292  | 0.00037  | 0.25771  | 332.9    | 3.1                | 332.4    | 2.3      | 334   | 24       | 332.4    | 2.3      | 0.2          | Single Age   |  |

|            |       |       |        |       |         |        |         |        |      |        |       |      |     |        |      |      |            |
|------------|-------|-------|--------|-------|---------|--------|---------|--------|------|--------|-------|------|-----|--------|------|------|------------|
| 09SFB29-18 | 280   | 3.7   | 0.3368 | 0.012 | 0.0463  | 0.0011 | 0.60045 | 294.4  | 9.2  | 291.5  | 6.5   | 303  | 22  | 291.5  | 6.5  | 1.0  | Single Age |
| 09SFB29-19 | 950   | 4.84  | 0.3213 | 0.012 | 0.0445  | 0.0012 | 0.81137 | 283.4  | 9.0  | 280.6  | 7.2   | 291  | 19  | 280.6  | 7.2  | 1.0  | Single Age |
| 09SFB29-20 | 277   | 2.098 | 0.488  | 0.015 | 0.0644  | 0.0017 | 0.78301 | 403.1  | 10.0 | 403.0  | 10.0  | 414  | 24  | 403.0  | 10.0 | 0.0  | Single Age |
| 09SFB29-21 | 170   | 16.8  | 0.79   | 0.025 | 0.0937  | 0.0027 | 0.75457 | 590.0  | 14.0 | 577.0  | 16.0  | 626  | 27  | 577.0  | 16.0 | 2.2  | Single Age |
| 09SFB29-22 | 353   | 3.57  | 0.3667 | 0.013 | 0.0496  | 0.0015 | 0.61678 | 316.8  | 9.5  | 312.3  | 9.0   | 363  | 31  | 312.3  | 9.0  | 1.4  | Single Age |
| 09SFB29-23 | 303   | 1.174 | 0.873  | 0.02  | 0.1054  | 0.0029 | 0.74123 | 636.4  | 11.0 | 645.0  | 17.0  | 634  | 21  | 645.0  | 17.0 | -1.4 | Single Age |
| 09SFB29-24 | 1,342 | 0.825 | 31.5   | 2.3   | 0.311   | 0.024  | 0.74451 | 3523.0 | 69.0 | 1720.0 | 120.0 | 4792 | 41  | DISC   | DISC | 64.1 | Single Age |
| 09SFB29-25 | 503   | 6.39  | 0.3026 | 0.011 | 0.0427  | 0.0014 | 0.72879 | 268.2  | 8.9  | 269.8  | 8.8   | 279  | 25  | 269.8  | 8.8  | -0.6 | Single Age |
| 09SFB29-26 | 626   | 2.898 | 0.334  | 0.013 | 0.0463  | 0.0016 | 0.68978 | 293.1  | 9.8  | 291.9  | 10.0  | 321  | 30  | 291.9  | 10.0 | 0.4  | Single Age |
| 09SFB29-27 | 236   | 1.8   | 0.594  | 0.02  | 0.076   | 0.0021 | 0.68771 | 472.0  | 13.0 | 472.0  | 13.0  | 468  | 31  | 472.0  | 13.0 | 0.0  | Single Age |
| 09SFB29-28 | 288   | 3.64  | 0.3561 | 0.012 | 0.0497  | 0.0015 | 0.56338 | 308.9  | 9.3  | 312.8  | 9.5   | 336  | 28  | 312.8  | 9.5  | -1.3 | Single Age |
| 09SFB29-29 | 239   | 1.244 | 0.325  | 0.014 | 0.0456  | 0.0015 | 0.60862 | 285.2  | 11.0 | 287.2  | 9.4   | 279  | 33  | 287.2  | 9.4  | -0.7 | Single Age |
| 09SFB29-30 | 357   | 3.04  | 0.55   | 0.13  | 0.0516  | 0.002  | 0.89087 | 390.0  | 57.0 | 324.0  | 12.0  | 560  | 200 | DISC   | DISC | 16.9 | Single Age |
| 09SFB29-31 | 489   | 22.4  | 0.455  | 0.026 | 0.0594  | 0.0026 | 0.82552 | 378.0  | 17.0 | 372.0  | 16.0  | 399  | 32  | 372.0  | 16.0 | 1.6  | Single Age |
| 09SFB29-32 | 898   | 16.52 | 1.364  | 0.034 | 0.1407  | 0.004  | 0.91548 | 872.0  | 14.0 | 848.0  | 23.0  | 917  | 11  | 848.0  | 23.0 | 2.8  | Single Age |
| 09SFB29-33 | 316   | 3.766 | 0.619  | 0.018 | 0.0782  | 0.0021 | 0.80228 | 488.3  | 11.0 | 485.0  | 12.0  | 488  | 14  | 485.0  | 12.0 | 0.7  | Single Age |
| 09SFB29-34 | 105.1 | 1.29  | 0.3199 | 0.013 | 0.0453  | 0.0014 | 0.50352 | 281.0  | 10.0 | 285.7  | 8.7   | 275  | 34  | 285.7  | 8.7  | -1.5 | Single Age |
| 09SFB29-35 | 391   | 82.5  | 0.409  | 0.014 | 0.0558  | 0.0015 | 0.71328 | 348.0  | 9.9  | 349.8  | 9.4   | 318  | 24  | 349.8  | 9.4  | -0.5 | Single Age |
| 09SFB29-36 | 874   | 7.49  | 0.3379 | 0.012 | 0.0475  | 0.0013 | 0.72472 | 296.1  | 9.3  | 299.0  | 8.2   | 285  | 22  | 299.0  | 8.2  | -1.0 | Single Age |
| 09SFB29-37 | 825   | 2.04  | 0.552  | 0.023 | 0.041   | 0.0014 | 0.67822 | 446.0  | 15.0 | 258.8  | 8.7   | 1551 | 47  | DISC   | DISC | 42.0 | Single Age |
| 09SFB29-38 | 339   | 1.9   | 1.084  | 0.036 | 0.1195  | 0.0038 | 0.88415 | 747.0  | 17.0 | 727.0  | 22.0  | 777  | 20  | 727.0  | 22.0 | 2.7  | Single Age |
| 09SFB29-39 | 327   | 2.357 | 0.3563 | 0.012 | 0.0491  | 0.0015 | 0.59533 | 309.2  | 9.2  | 308.6  | 8.9   | 333  | 26  | 308.6  | 8.9  | 0.2  | Single Age |
| 09SFB29-40 | 944   | 2.2   | 0.2998 | 0.011 | 0.042   | 0.0014 | 0.70672 | 266.0  | 8.7  | 265.4  | 8.7   | 262  | 19  | 265.4  | 8.7  | 0.2  | Single Age |
| 09SFB29-41 | 515   | 2.086 | 0.3741 | 0.013 | 0.0513  | 0.0016 | 0.7059  | 322.3  | 9.5  | 322.5  | 9.6   | 335  | 23  | 322.5  | 9.6  | -0.1 | Single Age |
| 09SFB29-42 | 324   | 10.75 | 0.604  | 0.016 | 0.0774  | 0.0021 | 0.68709 | 479.1  | 10.0 | 480.0  | 13.0  | 482  | 25  | 480.0  | 13.0 | -0.2 | Single Age |
| 09SFB29-43 | 308   | 1.849 | 0.3243 | 0.012 | 0.0454  | 0.0015 | 0.58563 | 284.9  | 9.0  | 286.0  | 9.0   | 297  | 25  | 286.0  | 9.0  | -0.4 | Single Age |
| 09SFB29-44 | 166.7 | 1.204 | 5.41   | 0.14  | 0.3188  | 0.0094 | 0.88639 | 1886.0 | 23.0 | 1781.0 | 46.0  | 1999 | 17  | 1999.0 | 17.0 | 10.9 | Single Age |
| 09SFB29-45 | 1157  | 2.92  | 0.3261 | 0.012 | 0.0446  | 0.0014 | 0.82112 | 286.4  | 8.9  | 281.0  | 8.7   | 327  | 20  | 281.0  | 8.7  | 1.9  | Single Age |
| 09SFB29-46 | 522   | 2.159 | 0.3411 | 0.012 | 0.0471  | 0.0015 | 0.78585 | 297.6  | 9.4  | 296.4  | 9.1   | 318  | 21  | 296.4  | 9.1  | 0.4  | Single Age |
| 09SFB29-47 | 714   | 3.05  | 0.3276 | 0.012 | 0.0453  | 0.0014 | 0.68427 | 287.4  | 9.2  | 285.4  | 8.4   | 291  | 20  | 285.4  | 8.4  | 0.7  | Single Age |
| 09SFB29-48 | 204   | 2.161 | 0.3149 | 0.013 | 0.0449  | 0.0014 | 0.60438 | 277.6  | 9.7  | 282.9  | 8.4   | 281  | 30  | 282.9  | 8.4  | -1.9 | Single Age |
| 09SFB29-49 | 248   | 5.98  | 0.572  | 0.017 | 0.0746  | 0.0022 | 0.65461 | 458.5  | 11.0 | 464.0  | 13.0  | 502  | 26  | 464.0  | 13.0 | -1.2 | Single Age |
| 09SFB29-50 | 213.4 | 5.3   | 0.571  | 0.017 | 0.0726  | 0.0022 | 0.64706 | 458.0  | 11.0 | 451.0  | 13.0  | 489  | 25  | 451.0  | 13.0 | 1.5  | Single Age |
| 09SFB29-51 | 599   | 2.401 | 0.405  | 0.015 | 0.0549  | 0.0017 | 0.70927 | 345.0  | 11.0 | 344.3  | 11.0  | 352  | 27  | 344.3  | 11.0 | 0.2  | Single Age |
| 09SFB29-52 | 1093  | 3.58  | 0.3402 | 0.012 | 0.0462  | 0.0016 | 0.79608 | 297.1  | 8.9  | 291.3  | 9.6   | 333  | 21  | 291.3  | 9.6  | 2.0  | Single Age |
| 09SFB29-53 | 633   | 0.448 | 0.35   | 0.052 | 0.0574  | 0.003  | 0.80473 | 376.0  | 11.0 | 359.0  | 12.0  | 505  | 26  | 359.0  | 12.0 | 4.5  | Single Age |
| 09SFB29-54 | 131.6 | 2.06  | 0.369  | 0.016 | 0.052   | 0.0015 | 0.62016 | 318.1  | 12.0 | 326.5  | 9.3   | 264  | 38  | 326.5  | 9.3  | -2.6 | Single Age |
| 09SFB29-55 | 314   | 2.03  | 0.3441 | 0.013 | 0.0475  | 0.0015 | 0.76708 | 300.7  | 9.8  | 299.1  | 9.1   | 290  | 20  | 299.1  | 9.1  | 0.5  | Single Age |
| 09SFB29-56 | 294   | 4.72  | 0.707  | 0.041 | 0.0836  | 0.0056 | 0.96177 | 541.0  | 24.0 | 516.0  | 34.0  | 652  | 26  | 516.0  | 34.0 | 4.6  | Single Age |
| 09SFB29-57 | 130   | 1.51  | 0.738  | 0.021 | 0.0906  | 0.0024 | 0.58542 | 561.0  | 12.0 | 559.0  | 14.0  | 606  | 25  | 559.0  | 14.0 | 0.4  | Single Age |
| 09SFB29-58 | 325   | 2.961 | 0.3283 | 0.012 | 0.0464  | 0.0014 | 0.63007 | 298.0  | 9.0  | 292.0  | 8.5   | 272  | 26  | 292.0  | 8.5  | -1.4 | Single Age |
| 09SFB29-59 | 220   | 10.49 | 1.818  | 0.077 | 0.1444  | 0.0052 | 0.88258 | 1048.0 | 28.0 | 872.0  | 29.0  | 1445 | 27  | DISC   | DISC | 39.7 | Single Age |
| 09SFB29-60 | 166.4 | 1.262 | 0.334  | 0.014 | 0.0456  | 0.0015 | 0.46297 | 293.1  | 11.0 | 287.6  | 9.2   | 346  | 33  | 287.6  | 9.2  | 1.9  | Single Age |
| 09SFB29-61 | 912   | 3.17  | 0.3361 | 0.012 | 0.0466  | 0.0014 | 0.72525 | 293.9  | 8.8  | 293.3  | 8.4   | 294  | 21  | 293.3  | 8.4  | 0.2  | Single Age |
| 09SFB29-62 | 133.9 | 1.413 | 0.857  | 0.025 | 0.1024  | 0.0027 | 0.64216 | 627.0  | 14.0 | 628.0  | 16.0  | 616  | 27  | 628.0  | 16.0 | -0.2 | Single Age |
| 09SFB29-63 | 272   | 2.05  | 0.744  | 0.022 | 0.0911  | 0.0026 | 0.70414 | 565.0  | 13.0 | 562.0  | 15.0  | 598  | 20  | 562.0  | 15.0 | 0.5  | Single Age |
| 09SFB29-64 | 252   | 1.797 | 0.3307 | 0.013 | 0.0451  | 0.0013 | 0.50257 | 289.6  | 10.0 | 284.3  | 7.8   | 365  | 27  | 284.3  | 7.8  | 1.8  | Single Age |
| 09SFB29-65 | 223.5 | 3.078 | 0.3524 | 0.013 | 0.0488  | 0.0016 | 0.563   | 306.1  | 9.8  | 308.9  | 9.9   | 321  | 29  | 306.8  | 9.9  | -0.2 | Single Age |
| 09SFB29-66 | 565   | 8.24  | 0.3358 | 0.012 | 0.0466  | 0.0015 | 0.70357 | 293.6  | 9.3  | 293.3  | 9.5   | 312  | 25  | 293.3  | 9.5  | 0.1  | Single Age |
| 09SFB29-67 | 354   | 2.652 | 0.352  | 0.014 | 0.0482  | 0.0015 | 0.61601 | 306.7  | 11.0 | 303.4  | 9.3   | 314  | 36  | 303.4  | 9.3  | 1.1  | Single Age |
| 09SFB29-68 | 18.98 | 1.721 | 0.18   | 0.019 | 0.0255  | 0.0014 | 0.22506 | 166.0  | 17.0 | 162.1  | 9.1   | 639  | 98  | 162.1  | 9.1  | 2.3  | Single Age |
| 09SFB29-69 | 1170  | 4.37  | 0.274  | 0.022 | 0.02078 | 0.0013 | 0.75283 | 243.0  | 17.0 | 132.6  | 7.9   | 1486 | 69  | DISC   | DISC | 45.4 | Single Age |
| 09SFB29-70 | 812   | 2.921 | 0.3573 | 0.013 | 0.0495  | 0.0015 | 0.74386 | 309.8  | 9.6  | 311.5  | 9.3   | 303  | 22  | 311.5  | 9.3  | -0.5 | Single Age |
| 09SFB29-71 | 97.8  | 11.33 | 6.22   | 0.16  | 0.3596  | 0.0093 | 0.87945 | 2003.0 | 23.0 | 1978.0 | 44.0  | 2033 | 16  | 2033.0 | 16.0 | 2.7  | Single Age |
| 09SFB29-72 | 272   | 14.9  | 0.661  | 0.03  | 0.0829  | 0.0032 | 0.87815 | 513.0  | 18.0 | 513.0  | 19.0  | 518  | 31  | 513.0  | 19.0 | 0.0  | Single Age |
| 09SFB29-73 | 263   | 2.38  | 0.287  | 0.014 | 0.0403  | 0.0015 | 0.46031 | 255.3  | 11.0 | 254.7  | 9.2   | 271  | 37  | 254.7  | 9.2  | 0.2  | Single Age |
| 09SFB29-74 | 179   | 1.61  | 0.353  | 0.015 | 0.0491  | 0.0015 | 0.4839  | 308.6  | 11.0 | 309.0  | 9.3   | 328  | 39  | 309.0  | 9.3  | -0.1 | Single Age |
| 09SFB29-75 | 78.1  | 2.87  | 0.326  | 0.016 | 0.045   | 0.0015 | 0.32162 | 285.9  | 12.0 | 283.8  | 9.4   | 375  | 46  | 283.8  | 9.4  | 0.7  | Single Age |
| 09SFB29-76 | 352   | 8.05  | 0.578  | 0.016 | 0.073   | 0.0021 | 0.6598  | 464.9  | 10.0 | 454.0  | 12.0  | 512  | 21  | 454.0  | 12.0 | 2.3  | Single Age |
| 09SFB29-77 | 84.8  | 2.22  | 3.42   | 0.18  | 0.23    | 0.01   | 0.92928 | 1495.0 | 41.0 | 1328.0 | 54.0  | 1758 | 25  | DISC   | DISC | 24.5 | Single Age |
| 09SFB29-78 | 166.9 | 2.015 | 0.289  | 0.014 | 0.0411  | 0.0014 | 0.50691 | 258.5  | 11.0 | 259.8  | 8.6   | 307  | 39  | 259.8  | 8.6  | -0.5 | Single Age |
| 09SFB29-79 | 351   | 1.86  | 0.3362 | 0.013 | 0.0469  | 0.0015 | 0.71352 | 293.9  | 9.6  | 295.3  | 9.1   | 288  | 23  | 295.3  | 9.1  | -0.5 | Single Age |
| 09SFB29-80 | 196   | 0.844 | 3.05   | 0.15  | 0.0707  | 0.0026 | 0.38774 | 1418.0 | 39.0 | 440.0  | 16.0  | 3554 | 50  | DISC   | DISC | 69.0 | Single Age |
| 09SFB29-81 | 45    | 5.04  | 1.243  | 0.042 | 0.132   | 0.0036 | 0.53579 | 101.0  | 19.0 | 799.0  | 20.0  | 854  | 36  | 799.0  | 20.0 | 2.2  | Single Age |
| 09SFB29-82 | 19.52 | 1.171 | 1.901  | 0.078 | 0.176   | 0.0048 | 0.59201 | 882.0  | 27.0 | 1044.0 | 26.0  | 1115 | 33  | 1115.0 | 33.0 | 6.4  | Single Age |
| 09SFB29-83 | 690   | 1.587 | 0.778  | 0.023 | 0.0939  | 0.0026 | 0.75785 | 583.0  | 13.0 | 578.0  | 15.0  | 601  | 18  | 578.0  | 15.0 | 0.9  | Single Age |
| 09SFB29-84 | 214   | 2.65  | 0.356  | 0.015 | 0.0471  | 0.0015 | 0.52995 | 308.4  | 11.0 | 296.5  | 9.0   | 307  | 35  | 296.5  | 9.0  | 3.9  | Single Age |
| 09SFB29-85 | 428   | 2.038 | 0.433  | 0.015 | 0.0551  | 0.0017 | 0.74119 | 365.5  | 10.0 | 345.5  | 10.0  | 501  | 27  | 345.5  | 10.0 | 5.5  | Single Age |
| 09SFB29-86 | 557   | 1.725 | 0.3415 | 0.013 | 0.0469  | 0.0015 | 0.74852 | 298.7  | 9.5  | 295.6  | 8.9   | 306  | 23  | 295.6  | 8.9  | 1.0  | Single Age |
| 09SFB29-87 | 84.3  | 1.443 | 0.416  | 0.019 | 0.0519  | 0.0019 | 0.52535 | 352.0  | 14.0 | 326.0  | 12.0  | 532  | 51  | 326.0  | 12.0 | 7.4  | Single Age |
| 09SFB29-88 | 213   |       |        |       |         |        |         |        |      |        |       |      |     |        |      |      |            |

|           |       |        |        |        |         |         |          |       |     |       |     |      |     |        |      |      |            |
|-----------|-------|--------|--------|--------|---------|---------|----------|-------|-----|-------|-----|------|-----|--------|------|------|------------|
| SFB05_35  | 243   | 24.1   | 5.63   | 0.13   | 0.3441  | 0.0058  | 0.83054  | 1920  | 20  | 1906  | 28  | 1961 | 24  | 1961.0 | 24.0 | 2.8  | Single Age |
| SFB05_36  | 517.5 | 1.87   | 0.8415 | 0.0099 | 0.0993  | 0.0012  | 0.75741  | 619.7 | 5.5 | 610.1 | 7   | 653  | 18  | 610.1  | 7.0  | 1.5  | Single Age |
| SFB05_37  | 883   | 1.427  | 0.3131 | 0.0027 | 0.04351 | 0.00038 | 0.58023  | 276.9 | 2.1 | 274.5 | 2.3 | 309  | 18  | 274.5  | 2.3  | 0.9  | Single Age |
| SFB05_40  | 970   | 1.871  | 0.3076 | 0.0031 | 0.04289 | 0.0004  | 0.67776  | 272.3 | 2.4 | 270.7 | 2.5 | 283  | 17  | 270.7  | 2.5  | 0.6  | Single Age |
| SFB05_41  | 6620  | 2.6    | 0.1974 | 0.006  | 0.01459 | 0.00079 | 0.3295   | 182.9 | 5   | 93.4  | 5   | 1602 | 99  | DISC   | DISC | 48.9 | Rim        |
| SFB05_41  | 804   | 1.661  | 0.3335 | 0.006  | 0.04644 | 0.00079 | 0.59688  | 292.2 | 4.5 | 292.6 | 4.9 | 303  | 37  | 292.6  | 4.9  | -0.1 | Core       |
| SFB05_42  | 1498  | 3.499  | 0.2519 | 0.0059 | 0.03323 | 0.00094 | 0.75607  | 228   | 4.8 | 210.7 | 5.9 | 420  | 38  | 210.7  | 5.9  | 7.6  | Single Age |
| SFB05_43  | 537   | 1.85   | 0.3361 | 0.0047 | 0.04682 | 0.00067 | 0.64156  | 294.5 | 3.5 | 294.9 | 4.1 | 292  | 27  | 294.9  | 4.1  | -0.1 | Single Age |
| SFB05_44  | 462.4 | 0.669  | 0.3132 | 0.0032 | 0.04376 | 0.00034 | 0.52147  | 276.9 | 2.6 | 276.1 | 2.1 | 282  | 22  | 276.1  | 2.1  | 0.3  | Single Age |
| SFB05_46  | 158.7 | 1.267  | 0.849  | 0.016  | 0.09889 | 0.00088 | 0.47794  | 623.6 | 8.8 | 607.9 | 5.2 | 687  | 33  | 607.9  | 5.2  | 2.5  | Single Age |
| SFB05_47  | 318   | 1.8    | 0.346  | 0.0058 | 0.04767 | 0.00072 | 0.42739  | 301.5 | 4.4 | 300.2 | 4.4 | 311  | 33  | 300.2  | 4.4  | 0.4  | Single Age |
| SFB05_49  | 1077  | 1.341  | 0.3224 | 0.0035 | 0.04484 | 0.00056 | 0.67075  | 283.7 | 2.7 | 282.7 | 3.5 | 316  | 21  | 282.7  | 3.5  | 0.4  | Single Age |
| SFB05_50  | 103.1 | 1.509  | 0.3136 | 0.0053 | 0.04429 | 0.00051 | 0.041537 | 276.8 | 4.1 | 279.4 | 3.1 | 258  | 45  | 279.4  | 3.1  | -0.9 | Single Age |
| SFB05_51  | 807   | 1.523  | 0.3251 | 0.0034 | 0.04504 | 0.00038 | 0.46655  | 285.8 | 2.6 | 284   | 2.3 | 321  | 23  | 284.0  | 2.3  | 0.6  | Single Age |
| SFB05_52  | 1364  | 1.689  | 0.3127 | 0.002  | 0.04226 | 0.00028 | 0.36378  | 276.3 | 1.5 | 266.8 | 1.7 | 375  | 17  | 266.8  | 1.7  | 3.4  | Single Age |
| SFB05_53  | 828   | 1.84   | 0.3363 | 0.0072 | 0.0462  | 0.0011  | 0.53926  | 294.3 | 5.5 | 291.4 | 6.9 | 360  | 54  | 291.4  | 6.9  | 1.0  | Single Age |
| SFB05_54  | 612   | 2.68   | 0.2865 | 0.0041 | 0.03943 | 0.00043 | 0.55873  | 255.7 | 3.2 | 249.3 | 2.7 | 327  | 31  | 249.3  | 2.7  | 2.5  | Single Age |
| SFB05_56  | 512.4 | 2.379  | 0.3303 | 0.0077 | 0.04505 | 0.00054 | 0.4831   | 289.7 | 5.9 | 284.1 | 3.4 | 348  | 41  | 284.1  | 3.4  | 1.9  | Single Age |
| SFB05_57  | 263.6 | 9.59   | 0.508  | 0.013  | 0.063   | 0.0011  | 0.17049  | 416.8 | 9   | 394   | 6.7 | 564  | 54  | 394.0  | 6.7  | 5.5  | Single Age |
| SFB05_59  | 205.1 | 5.64   | 0.571  | 0.013  | 0.07332 | 0.00092 | 0.31664  | 458.4 | 8.6 | 456.1 | 5.6 | 472  | 53  | 456.1  | 5.6  | 0.5  | Single Age |
| SFB05_60  | 536   | 2.56   | 0.5114 | 0.0097 | 0.0644  | 0.0012  | 0.69371  | 419.2 | 6.5 | 402.5 | 7.3 | 496  | 29  | 402.5  | 7.3  | 4.0  | Single Age |
| SFB05_62  | 7970  | 6.01   | 0.1573 | 0.0098 | 0.017   | 0.0016  | 0.72332  | 148.3 | 8.7 | 108.7 | 9.9 | 860  | 130 | DISC   | DISC | 26.7 | Rim        |
| SFB05_62  | 799   | 2.087  | 0.3325 | 0.0063 | 0.04455 | 0.00082 | 0.61089  | 291.4 | 4.8 | 281   | 5.1 | 371  | 31  | 281.0  | 5.1  | 3.6  | Core       |
| SFB05_63  | 910   | 2.07   | 0.3094 | 0.0045 | 0.04275 | 0.00062 | 0.7749   | 273.6 | 3.5 | 269.9 | 3.8 | 303  | 22  | 269.9  | 3.8  | 1.4  | Single Age |
| SFB05_64  | 429   | 3.28   | 0.5315 | 0.0088 | 0.06868 | 0.00083 | 0.47104  | 432.7 | 5.9 | 428.2 | 5   | 467  | 34  | 428.2  | 5.0  | 1.0  | Single Age |
| SFB05_65  | 254   | 0.728  | 0.3192 | 0.0068 | 0.04435 | 0.00073 | 0.67388  | 281   | 5.3 | 279.7 | 4.5 | 288  | 36  | 279.7  | 4.5  | 0.5  | Single Age |
| SFB05_66  | 551   | 1.818  | 0.3434 | 0.0041 | 0.04436 | 0.00049 | 0.30849  | 299.7 | 3.1 | 279.8 | 3   | 459  | 29  | 279.8  | 3.0  | 6.6  | Single Age |
| SFB05_67  | 126   | 1.36   | 0.3167 | 0.005  | 0.04393 | 0.0005  | 0.029947 | 279.2 | 3.8 | 277.1 | 3.1 | 295  | 47  | 277.1  | 3.1  | 0.8  | Single Age |
| SFB05_68  | 93.3  | 0.974  | 0.3084 | 0.009  | 0.04211 | 0.00073 | 0.01     | 272.6 | 7   | 265.9 | 4.5 | 321  | 71  | 265.9  | 4.5  | 2.5  | Single Age |
| SFB05_69  | 277   | 1.253  | 0.3447 | 0.0042 | 0.04773 | 0.0004  | 0.26879  | 300.6 | 3.2 | 300.6 | 2.5 | 301  | 27  | 300.6  | 2.5  | 0.0  | Single Age |
| SFB05_70  | 850   | 1.686  | 0.425  | 0.028  | 0.04329 | 0.0006  | 0.5      | 357   | 20  | 273.2 | 3.7 | 900  | 150 | DISC   | DISC | 23.5 | Single Age |
| SFB05_71  | 101.8 | 1.398  | 0.3207 | 0.0075 | 0.04504 | 0.00061 | 0.2894   | 282.2 | 5.7 | 284   | 3.8 | 271  | 58  | 284.0  | 3.8  | -0.6 | Single Age |
| SFB05_72  | 203   | 3.274  | 0.3394 | 0.0051 | 0.04674 | 0.00046 | 0.32831  | 296.6 | 3.9 | 294.5 | 2.8 | 299  | 37  | 294.5  | 2.8  | 0.7  | Single Age |
| SFB05_73  | 340   | 14.8   | 0.353  | 0.033  | 0.0485  | 0.005   | 0.97156  | 306   | 24  | 305   | 3.1 | 327  | 53  | DISC   | DISC | 0.3  | Rim        |
| SFB05_73  | 130.1 | 0.9183 | 0.925  | 0.016  | 0.1064  | 0.0011  | 0.43646  | 665   | 8.3 | 651.7 | 6.6 | 702  | 33  | 651.7  | 6.6  | 2.0  | Core       |
| SFB05_74  | 253   | 1.171  | 1.226  | 0.021  | 0.1334  | 0.0028  | 0.79886  | 612   | 9.5 | 807   | 16  | 811  | 31  | 807.0  | 16.0 | 0.6  | Single Age |
| SFB05_75  | 1110  | 47.8   | 0.4    | 0.02   | 0.0551  | 0.0026  | 0.90253  | 341   | 15  | 346   | 16  | 318  | 53  | 346.0  | 16.0 | -1.5 | Rim        |
| SFB05_75  | 332   | 9.98   | 0.5937 | 0.0066 | 0.07674 | 0.00076 | 0.61703  | 473.1 | 4.2 | 476.6 | 4.6 | 470  | 21  | 476.6  | 4.6  | -0.7 | Core       |
| SFB05_76  | 415   | 2.979  | 0.169  | 0.01   | 0.0242  | 0.00068 | 0.25676  | 158.4 | 9   | 154.1 | 4.3 | 220  | 140 | 154.1  | 4.3  | 2.7  | Rim        |
| SFB05_76  | 462   | 0.976  | 0.3239 | 0.0033 | 0.04452 | 0.00052 | 0.54743  | 284.9 | 2.5 | 280.8 | 3.2 | 303  | 26  | 280.8  | 3.2  | 1.4  | Core       |
| SFB05_77  | 213.1 | 1.63   | 0.3503 | 0.0066 | 0.04783 | 0.00074 | 0.41971  | 304.8 | 5   | 301.2 | 4.6 | 329  | 40  | 301.2  | 4.6  | 1.2  | Single Age |
| SFB05_78  | 499   | 13.26  | 0.943  | 0.015  | 0.1078  | 0.0016  | 0.81955  | 674.2 | 8.1 | 659.8 | 9.1 | 709  | 19  | 659.8  | 9.1  | 2.1  | Single Age |
| SFB05_79  | 819   | 1.635  | 0.3    | 0.0051 | 0.03989 | 0.00069 | 0.46251  | 266.3 | 4   | 252.1 | 4.3 | 369  | 43  | 252.1  | 4.3  | 5.3  | Rim        |
| SFB05_79  | 544   | 1.274  | 0.327  | 0.0046 | 0.045   | 0.0005  | 0.26302  | 287.2 | 3.5 | 283.8 | 3.1 | 299  | 35  | 283.8  | 3.1  | 1.2  | Core       |
| SFB05_80  | 287   | 1.757  | 0.3399 | 0.0044 | 0.04665 | 0.00053 | 0.29189  | 297   | 3.3 | 293.9 | 3.3 | 321  | 34  | 293.9  | 3.3  | 1.0  | Single Age |
| SFB05_81  | 395   | 1.78   | 0.3923 | 0.0071 | 0.05384 | 0.0007  | 0.33398  | 336   | 5.2 | 338.1 | 4.3 | 322  | 35  | 338.1  | 4.3  | -0.6 | Single Age |
| SFB05_82  | 907   | 1.951  | 0.349  | 0.012  | 0.04302 | 0.00071 | 0.59857  | 303.9 | 9.2 | 271.5 | 4.4 | 559  | 58  | DISC   | DISC | 10.7 | Single Age |
| SFB05_83  | 849   | 2.17   | 0.2956 | 0.0036 | 0.04047 | 0.00053 | 0.7726   | 262.9 | 2.8 | 255.7 | 3.3 | 301  | 20  | 255.7  | 3.3  | 2.7  | Single Age |
| SFB05_85  | 224   | 2.88   | 2.269  | 0.071  | 0.1905  | 0.0041  | 0.65213  | 1201  | 22  | 1124  | 22  | 1327 | 49  | 1327.0 | 49.0 | 15.3 | Single Age |
| SFB05_86  | 105   | 2.264  | 0.3146 | 0.0062 | 0.04333 | 0.0004  | 0.078754 | 277.6 | 4.8 | 273.4 | 2.5 | 347  | 47  | 273.4  | 2.5  | 1.5  | Single Age |
| SFB05_87  | 117.7 | 1.65   | 0.839  | 0.021  | 0.099   | 0.0014  | 0.48867  | 618   | 11  | 608.7 | 8.1 | 643  | 52  | 608.7  | 8.1  | 1.5  | Single Age |
| SFB05_88  | 211.3 | 1.375  | 0.3243 | 0.0056 | 0.04493 | 0.00044 | 0.23941  | 285.1 | 4.3 | 283.3 | 2.7 | 291  | 41  | 283.3  | 2.7  | 0.6  | Single Age |
| SFB05_89  | 660   | 2.046  | 0.3434 | 0.0048 | 0.0466  | 0.00061 | 0.54965  | 299.7 | 3.6 | 293.6 | 3.8 | 334  | 28  | 293.6  | 3.8  | 2.0  | Single Age |
| SFB05_90  | 79.6  | 1.56   | 0.3158 | 0.0077 | 0.04413 | 0.00055 | 0.16526  | 278.3 | 5.9 | 278.3 | 3.4 | 260  | 52  | 278.3  | 3.4  | 0.0  | Single Age |
| SFB05_92  | 157.4 | 1.654  | 0.3944 | 0.007  | 0.05235 | 0.00062 | 0.14896  | 337.4 | 5.1 | 328.9 | 3.8 | 398  | 45  | 328.9  | 3.8  | 2.5  | Single Age |
| SFB05_93  | 2350  | 4.02   | 0.2582 | 0.0048 | 0.03419 | 0.00056 | 0.88334  | 233.8 | 4   | 216.7 | 3.5 | 400  | 20  | 216.7  | 3.5  | 7.3  | Single Age |
| SFB05_94  | 113.5 | 2.588  | 0.313  | 0.0056 | 0.04359 | 0.00057 | 0.14101  | 276.4 | 4.4 | 275   | 3.5 | 288  | 47  | 275.0  | 3.5  | 0.5  | Single Age |
| SFB05_95  | 1478  | 1.096  | 0.3329 | 0.007  | 0.0387  | 0.00061 | 0.038807 | 292.4 | 5.5 | 244.7 | 3.8 | 711  | 56  | DISC   | DISC | 16.3 | Single Age |
| SFB05_96  | 867   | 2.065  | 0.3074 | 0.0043 | 0.04243 | 0.00054 | 0.84889  | 272.6 | 3.5 | 267.9 | 3.3 | 304  | 18  | 267.9  | 3.3  | 1.7  | Single Age |
| SFB05_97  | 181.9 | 0.728  | 0.635  | 0.01   | 0.075   | 0.001   | 0.1179   | 498.7 | 6.4 | 466.2 | 6   | 611  | 45  | 466.2  | 6.0  | 6.5  | Single Age |
| SFB05_98  | 51.9  | 0.9    | 1.186  | 0.02   | 0.127   | 0.0016  | 0.19398  | 793.7 | 9.4 | 770.7 | 9.1 | 846  | 37  | 770.7  | 9.1  | 2.9  | Single Age |
| SFB05_99  | 104.8 | 1.682  | 0.3165 | 0.0073 | 0.04386 | 0.00063 | 0.25169  | 279.6 | 5.5 | 276.7 | 3.9 | 269  | 55  | 276.7  | 3.9  | 1.0  | Single Age |
| SFB05_100 | 710   | 3.002  | 0.3414 | 0.0029 | 0.04663 | 0.0004  | 0.60003  | 298.2 | 2.2 | 293.8 | 2.5 | 328  | 18  | 293.8  | 2.5  | 1.5  | Single Age |
| SFB05_101 | 561.9 | 1.023  | 0.6722 | 0.0093 | 0.0777  | 0.0013  | 0.71396  | 522   | 5.6 | 482.7 | 7.8 | 688  | 32  | 482.7  | 7.8  | 7.5  | Single Age |
| SFB05_102 | 437   | 1.231  | 0.3458 | 0.0056 | 0.04615 | 0.00044 | 0.45023  | 301.4 | 4.2 | 290.8 | 2.7 | 398  | 39  | 290.8  | 2.7  | 3.5  | Single Age |
| SFB05_103 | 267   | 2.2    | 0.3479 | 0.0062 | 0.04742 | 0.00064 | 0.32002  | 303   | 4.7 | 298.6 | 3.9 | 311  | 40  | 298.6  | 3.9  | 1.5  | Single Age |
| SFB05_104 | 267.4 | 0.9586 | 0.3349 | 0.0046 | 0.04588 | 0.00049 | 0.32902  | 293.7 | 3.6 | 289.2 | 3   | 331  | 36  | 289.2  | 3.0  | 1.5  | Single Age |
| SFB05_105 | 37    | 1.106  | 0.68   | 0.018  | 0.0836  | 0.001   | 0.20594  | 526   | 11  | 517.4 | 6   | 544  | 63  | 517.4  | 6.0  | 1.6  | Single Age |
| SFB05_106 | 670   | 25.7   | 0.2628 | 0.0071 | 0.0354  | 0.0012  | 0.80618  | 236.8 | 5.7 | 224.2 | 7.6 | 343  | 48  | 224.2  | 7.6  | 5.3  | Rim        |
| SFB05_106 | 338   | 1.91   | 0.73   | 0.01   | 0.0869  | 0.0012  | 0.83048  | 556.2 | 5.9 | 537.2 | 7.3 | 619  | 19  | 537.2  | 7.3  | 3.4  | Core       |
| SFB05_107 | 662   | 3.116  | 0.3233 | 0.0039 | 0.04434 | 0.0005  | 0.62439  | 284.4 | 3   | 279.7 | 3.1 | 304  | 23  | 279.7  | 3.1  | 1.7  | Single Age |
| SFB05_108 | 1162  | 8.1    | 0.2545 | 0.003  | 0.03505 | 0.00046 | 0.60976  | 230.2 | 2.5 | 222.1 | 2.8 | 290  | 27  | 222.   |      |      |            |

|          |       |        |        |        |         |         |          |       |     |       |     |       |     |        |      |      |            |
|----------|-------|--------|--------|--------|---------|---------|----------|-------|-----|-------|-----|-------|-----|--------|------|------|------------|
| SFB33_20 | 320   | 9.2    | 0.5787 | 0.0092 | 0.0742  | 0.0012  | 0.79114  | 463.4 | 5.9 | 461.6 | 7.5 | 479   | 13  | 461.6  | 7.5  | 0.4  | Single Age |
| SFB33_21 | 331   | 4.74   | 0.373  | 0.016  | 0.0514  | 0.0019  | 0.83671  | 324   | 11  | 323   | 12  | 322   | 15  | 323.0  | 12.0 | 0.3  | Rim        |
| SFB33_21 | 257.8 | 3.398  | 0.5598 | 0.0084 | 0.07255 | 0.00083 | 0.75631  | 451.3 | 5.5 | 451.5 | 5   | 451   | 13  | 451.5  | 5.0  | 0.0  | Core       |
| SFB33_22 | 1010  | 2.781  | 0.288  | 0.0076 | 0.0391  | 0.001   | 0.94935  | 256.8 | 6   | 247.1 | 6.4 | 368   | 14  | 247.1  | 6.4  | 3.8  | Single Age |
| SFB33_23 | 445.8 | 1.596  | 0.3085 | 0.0041 | 0.04253 | 0.00053 | 0.67702  | 273   | 3.2 | 268.5 | 3.3 | 295   | 14  | 268.5  | 3.3  | 1.6  | Single Age |
| SFB33_24 | 237   | 7.57   | 0.6026 | 0.0064 | 0.07701 | 0.00058 | 0.29453  | 479.4 | 3.9 | 478.2 | 3.4 | 487   | 13  | 478.2  | 3.4  | 0.3  | Single Age |
| SFB33_25 | 189   | 3.94   | 0.715  | 0.021  | 0.0893  | 0.0023  | 0.91933  | 548   | 13  | 551   | 14  | 511   | 13  | 551.0  | 14.0 | -0.5 | Single Age |
| SFB33_26 | 638   | 1.85   | 0.3003 | 0.0042 | 0.04103 | 0.00078 | 0.86798  | 266.5 | 3.3 | 259.2 | 4.8 | 361   | 12  | 259.2  | 4.8  | 2.7  | Single Age |
| SFB33_27 | 449   | 2.146  | 0.322  | 0.0035 | 0.0451  | 0.0006  | 0.68995  | 283.4 | 2.7 | 284.4 | 3.7 | 283   | 15  | 284.4  | 3.7  | -0.4 | Single Age |
| SFB33_28 | 1360  | 4      | 0.3089 | 0.0036 | 0.04298 | 0.00042 | 0.71552  | 273.7 | 2.9 | 271.2 | 2.6 | 293   | 8.6 | 271.2  | 2.6  | 0.9  | Single Age |
| SFB33_29 | 130.8 | 1.389  | 0.3366 | 0.0055 | 0.04678 | 0.00065 | 0.51916  | 294.4 | 4.2 | 294.7 | 4   | 286   | 21  | 294.7  | 4.0  | -0.1 | Single Age |
| SFB33_30 | 238.4 | 2.172  | 0.3439 | 0.0054 | 0.04761 | 0.00039 | 0.23506  | 300.1 | 4   | 299.8 | 2.4 | 301   | 19  | 299.8  | 2.4  | 0.1  | Single Age |
| SFB33_31 | 276.1 | 5.21   | 0.584  | 0.013  | 0.0754  | 0.0011  | 0.45352  | 466.7 | 8.1 | 468.8 | 6.5 | 479   | 23  | 468.8  | 6.5  | -0.4 | Rim        |
| SFB33_31 | 920   | 8.3    | 2.157  | 0.075  | 0.1694  | 0.0043  | 0.93193  | 1165  | 24  | 1009  | 24  | 1501  | 21  | DISC   | DISC | 32.8 | Core       |
| SFB33_32 | 122   | 1.256  | 0.3229 | 0.0046 | 0.04426 | 0.00039 | 0.37488  | 284   | 3.5 | 279.2 | 2.4 | 332   | 17  | 279.2  | 2.4  | 1.7  | Single Age |
| SFB33_34 | 267.1 | 1.273  | 0.3247 | 0.0034 | 0.04581 | 0.00033 | 0.31019  | 285.5 | 2.6 | 288.7 | 2   | 269   | 14  | 288.7  | 2.0  | -1.1 | Single Age |
| SFB33_35 | 183   | 2.334  | 0.3665 | 0.0045 | 0.0521  | 0.00055 | 0.36523  | 317   | 3.3 | 327.4 | 3.3 | 266   | 20  | 327.4  | 3.3  | -3.3 | Single Age |
| SFB33_36 | 244   | 1.736  | 0.3211 | 0.004  | 0.04484 | 0.00046 | 0.38549  | 282.7 | 3.1 | 282.7 | 2.8 | 281   | 15  | 282.7  | 2.8  | 0.0  | Single Age |
| SFB33_37 | 104.8 | 1.362  | 0.3417 | 0.0065 | 0.0474  | 0.0005  | 0.22409  | 298.3 | 4.9 | 298.5 | 3.1 | 302   | 23  | 298.5  | 3.1  | -0.1 | Single Age |
| SFB33_38 | 354   | 19.12  | 0.5725 | 0.0093 | 0.0732  | 0.0011  | 0.81888  | 460.4 | 5.8 | 455.5 | 6.7 | 462   | 11  | 455.5  | 6.7  | 1.1  | Single Age |
| SFB33_39 | 1120  | 1.169  | 0.2782 | 0.0022 | 0.03853 | 0.00029 | 0.89242  | 249.2 | 1.8 | 243.7 | 1.8 | 295.5 | 7.5 | 243.7  | 1.8  | 2.2  | Single Age |
| SFB33_40 | 2591  | 1.537  | 0.2945 | 0.0022 | 0.04055 | 0.00027 | 0.54117  | 262.1 | 1.7 | 256.3 | 1.7 | 312   | 10  | 256.3  | 1.7  | 2.2  | Single Age |
| SFB33_41 | 154   | 9.8    | 0.674  | 0.022  | 0.0855  | 0.0024  | 0.75146  | 526   | 15  | 529   | 14  | 524   | 44  | 529.0  | 14.0 | -0.6 | Rim        |
| SFB33_41 | 41.94 | 2.132  | 1.071  | 0.026  | 0.1212  | 0.0016  | 0.24232  | 739   | 13  | 737.3 | 8.9 | 726   | 52  | 737.3  | 8.9  | 0.2  | Core       |
| SFB33_42 | 355   | 2.507  | 0.3537 | 0.0053 | 0.04813 | 0.00056 | 0.43746  | 307.4 | 3.9 | 303   | 3.4 | 343   | 31  | 303.0  | 3.4  | 1.4  | Single Age |
| SFB33_43 | 4840  | 2.18   | 0.2044 | 0.0069 | 0.0263  | 0.0011  | 0.95479  | 188.7 | 5.8 | 167.1 | 6.6 | 448   | 25  | DISC   | DISC | 11.4 | Rim        |
| SFB33_43 | 743   | 1.815  | 0.3017 | 0.0049 | 0.03789 | 0.00095 | 0.79373  | 267.6 | 3.8 | 239.7 | 5.9 | 546   | 30  | DISC   | DISC | 10.4 | Core       |
| SFB33_44 | 180.9 | 1.116  | 0.3246 | 0.0072 | 0.04462 | 0.00063 | 0.24537  | 285.2 | 5.5 | 281.4 | 3.9 | 298   | 55  | 281.4  | 3.9  | 1.3  | Single Age |
| SFB33_45 | 66.4  | 1.086  | 0.3185 | 0.0072 | 0.04356 | 0.00061 | 0.080175 | 280.5 | 5.6 | 274.9 | 3.7 | 341   | 57  | 274.9  | 3.7  | 2.0  | Single Age |
| SFB33_46 | 1942  | 1.585  | 0.3357 | 0.0031 | 0.04535 | 0.00033 | 0.56334  | 293.9 | 2.4 | 285.9 | 2   | 364   | 18  | 285.9  | 2.0  | 2.7  | Single Age |
| SFB33_47 | 398   | 1.63   | 0.3392 | 0.0038 | 0.04689 | 0.00046 | 0.3435   | 296.9 | 2.8 | 295.4 | 2.8 | 307   | 28  | 295.4  | 2.8  | 0.5  | Single Age |
| SFB33_48 | 318   | 2.022  | 0.3119 | 0.0087 | 0.04214 | 0.00098 | 0.32188  | 275.5 | 6.7 | 266.1 | 6.1 | 334   | 64  | 266.1  | 6.1  | 3.4  | Single Age |
| SFB33_49 | 806   | 0.846  | 0.72   | 0.065  | 0.04235 | 0.00057 | 0.30245  | 544   | 37  | 267.4 | 3.5 | 1910  | 150 | DISC   | DISC | 50.8 | Single Age |
| SFB33_50 | 115.6 | 3.02   | 0.5526 | 0.0098 | 0.07098 | 0.00079 | 0.27344  | 464.4 | 6.2 | 442   | 4.8 | 457   | 42  | 442.0  | 4.8  | 1.0  | Single Age |
| SFB33_51 | 492   | 1.555  | 0.5316 | 0.0038 | 0.04589 | 0.00038 | 0.50947  | 290.7 | 2.9 | 289.2 | 2.3 | 296   | 24  | 289.2  | 2.3  | 0.5  | Single Age |
| SFB33_52 | 227   | 1.39   | 0.623  | 0.0087 | 0.07135 | 0.00078 | 0.34042  | 481.5 | 5.4 | 444.3 | 4.7 | 724   | 25  | 444.3  | 4.7  | 9.6  | Single Age |
| SFB33_53 | 481   | 1.496  | 0.3404 | 0.0046 | 0.04682 | 0.00046 | 0.47189  | 287.4 | 3.5 | 293.7 | 2.8 | 319   | 31  | 293.7  | 2.8  | 1.2  | Single Age |
| SFB33_54 | 294.7 | 2.87   | 0.572  | 0.0053 | 0.07409 | 0.00064 | 0.44833  | 459.2 | 3.4 | 460.7 | 3.8 | 457   | 21  | 460.7  | 3.8  | -0.3 | Single Age |
| SFB33_55 | 236   | 1.239  | 0.3308 | 0.0044 | 0.04598 | 0.00042 | 0.12109  | 290.1 | 3.3 | 289.8 | 2.6 | 304   | 35  | 289.8  | 2.6  | 0.1  | Single Age |
| SFB33_56 | 692   | 19.2   | 0.647  | 0.026  | 0.0788  | 0.0017  | 0.83553  | 506   | 16  | 489   | 10  | 597   | 57  | 489.0  | 10.0 | 3.4  | Rim        |
| SFB33_56 | 60.9  | 1.023  | 4.83   | 0.11   | 0.2994  | 0.0052  | 0.66903  | 1790  | 19  | 1688  | 26  | 1893  | 34  | 1893.0 | 34.0 | 10.8 | Core       |
| SFB33_57 | 377   | 2.75   | 0.3093 | 0.0043 | 0.04267 | 0.00045 | 0.53775  | 273.6 | 3.3 | 269.4 | 2.8 | 307   | 26  | 269.4  | 2.8  | 1.5  | Single Age |
| SFB33_58 | 912   | 2.638  | 0.2811 | 0.003  | 0.03874 | 0.00035 | 0.30356  | 251.8 | 2.3 | 245   | 2.1 | 337   | 18  | 245.0  | 2.1  | 2.7  | Single Age |
| SFB33_59 | 208.7 | 4.151  | 0.5707 | 0.0086 | 0.07302 | 0.00075 | 0.17007  | 458.3 | 5.6 | 454.3 | 4.5 | 462   | 39  | 454.3  | 4.5  | 0.9  | Single Age |
| SFB33_60 | 446   | 1.239  | 0.3703 | 0.0062 | 0.04664 | 0.00042 | 0.41799  | 319.7 | 4.6 | 293.8 | 2.6 | 495   | 34  | 293.8  | 2.6  | 8.1  | Single Age |
| SFB33_61 | 160.4 | 0.77   | 1.605  | 0.021  | 0.1588  | 0.0018  | 0.71094  | 972   | 8.1 | 950   | 10  | 1002  | 22  | 1002.0 | 22.0 | 5.2  | Single Age |
| SFB33_62 | 3548  | 7.5    | 0.2266 | 0.0057 | 0.02787 | 0.00049 | 0.28291  | 207.3 | 4.7 | 177.2 | 3.1 | 547   | 60  | DISC   | DISC | 14.5 | Rim        |
| SFB33_62 | 1020  | 2.507  | 0.3323 | 0.0066 | 0.04556 | 0.00086 | 0.79439  | 291.1 | 5.1 | 287.2 | 5.3 | 325   | 23  | 287.2  | 5.3  | 1.3  | Core       |
| SFB33_63 | 172.9 | 3.88   | 0.583  | 0.009  | 0.07453 | 0.00084 | 0.33923  | 466.2 | 5.7 | 463.4 | 5   | 460   | 33  | 463.4  | 5.0  | 0.6  | Single Age |
| SFB33_64 | 911   | 1.605  | 0.3181 | 0.0027 | 0.04354 | 0.00032 | 0.53531  | 280.4 | 2.1 | 274.7 | 2   | 322   | 20  | 274.7  | 2.0  | 2.0  | Single Age |
| SFB33_65 | 368   | 1.706  | 0.3397 | 0.0046 | 0.04612 | 0.00052 | 0.62699  | 297.4 | 3.4 | 290.6 | 3.2 | 352   | 25  | 290.6  | 3.2  | 2.3  | Single Age |
| SFB33_66 | 417.9 | 1.208  | 0.3275 | 0.0042 | 0.04552 | 0.00045 | 0.59114  | 287.5 | 3.2 | 286.9 | 2.8 | 283   | 26  | 286.9  | 2.8  | 0.2  | Single Age |
| SFB33_67 | 519   | 2.247  | 0.3343 | 0.0036 | 0.04587 | 0.00035 | 0.58436  | 292.8 | 2.7 | 289.1 | 2.1 | 307   | 20  | 289.1  | 2.1  | 1.3  | Single Age |
| SFB33_68 | 194   | 1.283  | 0.603  | 0.014  | 0.07265 | 0.00065 | 0.16034  | 478.4 | 8.5 | 452.1 | 3.9 | 585   | 49  | 452.1  | 3.9  | 5.5  | Single Age |
| SFB33_69 | 32.3  | 0.675  | 1.849  | 0.045  | 0.1787  | 0.0025  | 0.23975  | 1062  | 16  | 1060  | 14  | 1096  | 54  | 1096.0 | 54.0 | 3.3  | Single Age |
| SFB33_70 | 541   | 1.565  | 0.3539 | 0.0042 | 0.04909 | 0.00039 | 0.49223  | 307.5 | 3.1 | 308.9 | 2.4 | 308   | 23  | 308.9  | 2.4  | -0.5 | Single Age |
| SFB33_71 | 558   | 3.75   | 0.5927 | 0.0091 | 0.0764  | 0.0011  | 0.60581  | 472.5 | 5.8 | 474.8 | 6.6 | 468   | 33  | 474.8  | 6.6  | -0.5 | Rim        |
| SFB33_71 | 285   | 1.31   | 0.877  | 0.017  | 0.1015  | 0.0018  | 0.79194  | 638.9 | 9.3 | 623   | 11  | 679   | 22  | 623.0  | 11.0 | 2.5  | Core       |
| SFB33_72 | 815   | 0.793  | 0.3276 | 0.0036 | 0.04522 | 0.00047 | 0.70101  | 287.7 | 2.7 | 285.1 | 2.9 | 317   | 16  | 285.1  | 2.9  | 0.9  | Single Age |
| SFB33_73 | 120.3 | 1.327  | 0.3259 | 0.0068 | 0.04408 | 0.00042 | 0.18022  | 286.2 | 5.2 | 278.1 | 2.6 | 343   | 50  | 278.1  | 2.6  | 2.8  | Single Age |
| SFB33_74 | 433   | 1.2098 | 0.3477 | 0.0034 | 0.04775 | 0.00037 | 0.28207  | 303.3 | 2.5 | 301   | 2.3 | 317   | 23  | 301.0  | 2.3  | 0.8  | Single Age |
| SFB33_75 | 1049  | 1.397  | 0.2909 | 0.0031 | 0.03912 | 0.00041 | 0.66717  | 259.2 | 2.4 | 247.4 | 2.6 | 354   | 20  | 247.4  | 2.6  | 4.6  | Single Age |
| SFB33_76 | 179   | 1.167  | 0.3213 | 0.0053 | 0.04414 | 0.00047 | 0.38058  | 282.8 | 4.1 | 278.4 | 2.9 | 296   | 39  | 278.4  | 2.9  | 1.6  | Single Age |
| SFB33_77 | 246.9 | 1.326  | 0.3564 | 0.0045 | 0.04894 | 0.00044 | 0.018508 | 309.4 | 3.4 | 308   | 2.7 | 300   | 33  | 308.0  | 2.7  | 0.5  | Single Age |
| SFB33_78 | 218   | 1.071  | 0.3353 | 0.006  | 0.04652 | 0.00077 | 0.40608  | 293.5 | 4.6 | 293.1 | 4.7 | 315   | 42  | 293.1  | 4.7  | 0.1  | Single Age |
| SFB33_79 | 585   | 1.162  | 0.3384 | 0.0058 | 0.04645 | 0.00067 | 0.63009  | 295.9 | 4.4 | 292.7 | 4.1 | 316   | 30  | 292.7  | 4.1  | 1.1  | Single Age |
| SFB33_81 | 544   | 1.92   | 0.3405 | 0.0024 | 0.04696 | 0.00033 | 0.29808  | 297.5 | 1.8 | 295.8 | 2   | 308   | 19  | 295.8  | 2.0  | 0.6  | Single Age |
| SFB33_82 | 132   | 1.936  | 0.3129 | 0.0054 | 0.04399 | 0.00051 | 0.3426   | 276.2 | 4.2 | 277.5 | 3.2 | 254   | 40  | 277.5  | 3.2  | -0.5 | Single Age |
| SFB33_83 | 886   | 1.913  | 0.3129 | 0.0054 | 0.03649 | 0.00059 | -0.29905 | 276.3 | 4.2 | 231   | 3.7 | 674   | 61  | DISC   | DISC | 16.4 | Single Age |
| SFB33_84 | 553.3 | 2.001  | 0.3255 | 0.0054 | 0.0448  | 0.00034 | 0.1549   | 286.1 | 4.1 | 282.5 | 2.1 | 318   | 39  | 282.5  | 2.1  | 1.3  | Single Age |
| SFB33_85 | 418   | 2.45   | 0.3438 | 0.0041 | 0.04724 | 0.00047 | 0.34092  | 300   | 3.1 | 297.6 | 2.9 | 312   | 28  | 297.6  | 2.9  | 0.8  | Single Age |
| SFB33_86 | 475   | 4.5    | 0.6141 | 0.0073 | 0.07818 | 0.00065 | 0.3516   | 48    |     |       |     |       |     |        |      |      |            |

|            |       |       |        |       |         |        |          |        |      |        |      |      |     |        |      |      |            |
|------------|-------|-------|--------|-------|---------|--------|----------|--------|------|--------|------|------|-----|--------|------|------|------------|
| 09SFB33-20 | 187   | 11.35 | 0.5958 | 0.015 | 0.07626 | 0.0019 | 0.49452  | 475.0  | 9.6  | 473.7  | 12.0 | 496  | 16  | 473.7  | 12.0 | 0.3  | Single Age |
| 09SFB33-21 | 141   | 8.1   | 0.467  | 0.018 | 0.0635  | 0.0024 | 0.79415  | 388.9  | 12.0 | 396.5  | 15.0 | 359  | 19  | 396.5  | 15.0 | -2.0 | Single Age |
| 09SFB33-22 | 130.2 | 2.11  | 0.607  | 0.03  | 0.0762  | 0.0032 | 0.90707  | 482.0  | 19.0 | 473.0  | 19.0 | 536  | 29  | 473.0  | 19.0 | 1.9  | Single Age |
| 09SFB33-23 | 999   | 5.02  | 0.3382 | 0.014 | 0.04648 | 0.0019 | 0.73487  | 295.8  | 11.0 | 292.8  | 12.0 | 328  | 12  | 292.8  | 12.0 | 1.0  | Single Age |
| 09SFB33-24 | 530   | 4.66  | 0.3169 | 0.014 | 0.04337 | 0.0019 | 0.64156  | 279.4  | 11.0 | 273.7  | 12.0 | 342  | 14  | 273.7  | 12.0 | 2.0  | Single Age |
| 09SFB33-25 | 278   | 11.44 | 0.601  | 0.018 | 0.0762  | 0.0024 | 0.88417  | 477.5  | 12.0 | 473.3  | 14.0 | 508  | 15  | 473.3  | 14.0 | 0.9  | Single Age |
| 09SFB33-26 | 567   | 62.7  | 0.708  | 0.025 | 0.0858  | 0.0027 | 0.8794   | 542.0  | 15.0 | 530.0  | 16.0 | 608  | 22  | 530.0  | 16.0 | 2.2  | Single Age |
| 09SFB33-27 | 266   | 1.87  | 1.12   | 0.13  | 0.0911  | 0.0061 | 0.85153  | 729.0  | 51.0 | 561.0  | 36.0 | 1334 | 84  | DISC   | DISC | 23.0 | Single Age |
| 09SFB33-28 | 266   | 1.636 | 0.324  | 0.014 | 0.04365 | 0.0018 | 0.38225  | 284.9  | 11.0 | 275.4  | 11.0 | 385  | 20  | 275.4  | 11.0 | 3.3  | Single Age |
| 09SFB33-29 | 215   | 10.9  | 0.5606 | 0.016 | 0.0724  | 0.0021 | 0.63085  | 451.7  | 10.0 | 450.3  | 12.0 | 480  | 15  | 450.3  | 12.0 | 0.3  | Single Age |
| 09SFB33-30 | 299   | 6.28  | 0.412  | 0.017 | 0.04363 | 0.002  | 0.75195  | 349.7  | 12.0 | 275.2  | 12.0 | 905  | 23  | DISC   | DISC | 21.3 | Single Age |
| 09SFB33-31 | 16.46 | 5.77  | 0.945  | 0.038 | 0.1095  | 0.0042 | 0.6225   | 675.0  | 19.0 | 669.0  | 24.0 | 691  | 48  | 669.0  | 24.0 | 0.9  | Single Age |
| 09SFB33-32 | 24.76 | 1.044 | 0.132  | 0.018 | 0.00848 | 0.0018 | 0.01     | 125.0  | 16.0 | 54.5   | 12.0 | 1850 | 170 | DISC   | DISC | 56.4 | Single Age |
| 09SFB33-33 | 20.6  | 9.9   | 1.061  | 0.035 | 0.1297  | 0.0035 | 0.53232  | 735.0  | 16.0 | 786.0  | 20.0 | 622  | 34  | 786.0  | 20.0 | -6.9 | Single Age |
| 09SFB33-34 | 230   | 2.104 | 0.3942 | 0.015 | 0.05229 | 0.0019 | 0.2866   | 337.2  | 11.0 | 328.6  | 12.0 | 384  | 25  | 328.6  | 12.0 | 2.6  | Single Age |
| 09SFB33-35 | 293   | 1.926 | 0.607  | 0.028 | 0.0801  | 0.0038 | 0.94438  | 480.0  | 18.0 | 496.0  | 23.0 | 426  | 16  | 496.0  | 23.0 | -3.3 | Single Age |
| 09SFB33-36 | 580   | 19.3  | 0.593  | 0.017 | 0.0756  | 0.0022 | 0.80212  | 472.1  | 11.0 | 469.5  | 13.0 | 484  | 13  | 469.5  | 13.0 | 0.6  | Single Age |
| 09SFB33-37 | 134   | 1.67  | 1.571  | 0.055 | 0.1607  | 0.0049 | 0.90849  | 961.0  | 22.0 | 960.0  | 27.0 | 981  | 13  | 981.0  | 13.0 | 2.1  | Single Age |
| 09SFB33-38 | 96.1  | 3.62  | 0.578  | 0.017 | 0.0745  | 0.0021 | 0.3446   | 463.0  | 11.0 | 463.3  | 13.0 | 476  | 27  | 463.3  | 13.0 | -0.1 | Single Age |
| 09SFB33-39 | 256.7 | 3.02  | 0.3231 | 0.014 | 0.04501 | 0.0019 | 0.43802  | 284.2  | 11.0 | 283.8  | 12.0 | 292  | 17  | 283.8  | 12.0 | 0.1  | Single Age |
| 09SFB33-40 | 460   | 4.83  | 0.3375 | 0.014 | 0.04611 | 0.0019 | 0.44166  | 295.6  | 11.0 | 290.6  | 11.0 | 359  | 20  | 290.6  | 11.0 | 1.7  | Single Age |
| 09SFB33-41 | 276   | 3.35  | 0.3022 | 0.015 | 0.04063 | 0.002  | 0.75537  | 268.5  | 12.0 | 256.7  | 13.0 | 371  | 24  | 256.7  | 13.0 | 4.4  | Single Age |
| 09SFB33-42 | 342.8 | 3.363 | 0.3249 | 0.014 | 0.04594 | 0.0019 | 0.49294  | 285.6  | 11.0 | 289.5  | 11.0 | 264  | 15  | 289.5  | 11.0 | -1.4 | Single Age |
| 09SFB33-43 | 71.8  | 2.562 | 0.811  | 0.082 | 0.087   | 0.0059 | 0.96189  | 585.0  | 45.0 | 536.0  | 35.0 | 739  | 77  | 536.0  | 35.0 | 8.4  | Single Age |
| 09SFB33-44 | 295.3 | 3.959 | 0.3248 | 0.014 | 0.0447  | 0.0019 | 0.53025  | 285.5  | 11.0 | 281.9  | 12.0 | 329  | 25  | 281.9  | 12.0 | 1.3  | Single Age |
| 09SFB33-45 | 109.8 | 2.753 | 1.935  | 0.026 | 0.1872  | 0.0033 | 0.53866  | 1092.9 | 9.1  | 1106.0 | 18.0 | 1061 | 14  | 1061.0 | 14.0 | -4.2 | Single Age |
| 09SFB33-46 | 390   | 3.25  | 0.3696 | 0.015 | 0.04629 | 0.0019 | 0.57934  | 319.3  | 11.0 | 291.7  | 12.0 | 517  | 20  | 291.7  | 12.0 | 8.6  | Single Age |
| 09SFB33-47 | 269   | 2.394 | 0.477  | 0.017 | 0.061   | 0.0023 | 0.8093   | 395.4  | 12.0 | 381.7  | 14.0 | 453  | 20  | 381.7  | 14.0 | 3.5  | Single Age |
| 09SFB33-48 | 221.5 | 2.213 | 0.3118 | 0.015 | 0.04314 | 0.0019 | 0.56351  | 275.4  | 11.0 | 272.2  | 12.0 | 278  | 16  | 272.2  | 12.0 | 1.2  | Single Age |
| 09SFB33-49 | 1220  | 28.7  | 0.0531 | 0.003 | 0.96425 | 0.0034 | 0.96425  | 346.0  | 15.0 | 334.0  | 18.0 | 433  | 17  | 334.0  | 18.0 | 3.5  | Single Age |
| 09SFB33-50 | 518   | 4.09  | 0.544  | 0.018 | 0.0505  | 0.0022 | 0.01     | 440.8  | 12.0 | 317.8  | 14.0 | 1114 | 77  | DISC   | DISC | 27.9 | Single Age |
| 09SFB33-52 | 246   | 4.24  | 0.57   | 0.018 | 0.0714  | 0.0023 | 0.63653  | 458.6  | 12.0 | 444.3  | 14.0 | 539  | 21  | 444.3  | 14.0 | 3.1  | Single Age |
| 09SFB33-53 | 334   | 3.77  | 0.342  | 0.015 | 0.04554 | 0.002  | 0.59665  | 298.5  | 11.0 | 287.1  | 12.0 | 380  | 21  | 287.1  | 12.0 | 3.8  | Single Age |
| 09SFB33-54 | 386   | 10.42 | 0.3339 | 0.015 | 0.04614 | 0.002  | 0.54134  | 292.4  | 11.0 | 290.8  | 12.0 | 286  | 14  | 290.8  | 12.0 | 0.5  | Single Age |
| 09SFB33-55 | 801   | 3.02  | 0.3282 | 0.014 | 0.0404  | 0.0022 | 0.58746  | 288.1  | 11.0 | 255.2  | 13.0 | 528  | 40  | DISC   | DISC | 11.4 | Single Age |
| 09SFB33-56 | 129   | 6.73  | 0.495  | 0.019 | 0.0632  | 0.0026 | 0.6748   | 407.8  | 13.0 | 395.0  | 16.0 | 504  | 26  | 395.0  | 16.0 | 3.1  | Single Age |
| 09SFB33-57 | 522   | 4.498 | 0.3805 | 0.015 | 0.04931 | 0.002  | 0.72798  | 327.8  | 11.0 | 310.3  | 13.0 | 427  | 18  | 310.3  | 13.0 | 5.3  | Single Age |
| 09SFB33-58 | 366   | 1.352 | 0.548  | 0.018 | 0.0529  | 0.0028 | 0.76609  | 443.1  | 12.0 | 332.0  | 17.0 | 1140 | 40  | DISC   | DISC | 25.1 | Single Age |
| 09SFB33-59 | 619   | 3.301 | 0.7197 | 0.016 | 0.08695 | 0.0021 | 0.71777  | 550.3  | 9.5  | 537.4  | 12.0 | 598  | 10  | 537.4  | 12.0 | 2.3  | Single Age |
| 09SFB33-60 | 107.6 | 4.32  | 0.772  | 0.022 | 0.1024  | 0.0026 | 0.79678  | 581.0  | 13.0 | 628.0  | 15.0 | 417  | 20  | 628.0  | 15.0 | -8.1 | Single Age |
| 09SFB33-61 | 469   | 13.9  | 0.842  | 0.03  | 0.099   | 0.0034 | 0.9023   | 620.0  | 17.0 | 608.0  | 20.0 | 667  | 15  | 608.0  | 20.0 | 1.9  | Single Age |
| 09SFB33-62 | 313.7 | 2.57  | 0.3561 | 0.015 | 0.04518 | 0.002  | 0.57389  | 309.1  | 11.0 | 284.8  | 12.0 | 495  | 17  | 284.8  | 12.0 | 7.9  | Single Age |
| 09SFB33-63 | 353   | 2.382 | 0.3327 | 0.014 | 0.04572 | 0.0019 | 0.62826  | 291.5  | 11.0 | 288.1  | 12.0 | 306  | 14  | 288.1  | 12.0 | 1.2  | Single Age |
| 09SFB33-64 | 569   | 0.973 | 0.3899 | 0.017 | 0.04896 | 0.002  | 0.78755  | 333.9  | 12.0 | 308.1  | 12.0 | 537  | 28  | 308.1  | 12.0 | 7.7  | Single Age |
| 09SFB33-65 | 183   | 8.5   | 0.823  | 0.038 | 0.103   | 0.0036 | 0.55295  | 607.0  | 21.0 | 632.0  | 21.0 | 504  | 33  | 632.0  | 21.0 | -4.1 | Single Age |
| 09SFB33-66 | 383   | 2.143 | 0.503  | 0.018 | 0.06818 | 0.0021 | 0.40344  | 413.0  | 12.0 | 425.1  | 12.0 | 375  | 39  | 425.1  | 12.0 | -2.9 | Single Age |
| 09SFB33-67 | 717   | 10.67 | 0.443  | 0.022 | 0.0543  | 0.0027 | 0.70068  | 371.0  | 16.0 | 341.0  | 17.0 | 559  | 23  | 341.0  | 17.0 | 8.1  | Single Age |
| 09SFB33-69 | 395.8 | 4.74  | 0.8603 | 0.017 | 0.0779  | 0.0024 | 0.22737  | 514.0  | 10.0 | 483.6  | 14.0 | 623  | 25  | 483.6  | 14.0 | 6.0  | Single Age |
| 09SFB33-70 | 229   | 4.92  | 1.022  | 0.054 | 0.1122  | 0.005  | 0.96185  | 710.0  | 27.0 | 685.0  | 29.0 | 792  | 25  | 685.0  | 29.0 | 3.5  | Single Age |
| 09SFB33-71 | 1322  | 3.218 | 0.3274 | 0.015 | 0.04275 | 0.002  | 0.53763  | 287.4  | 11.0 | 269.9  | 12.0 | 415  | 22  | 269.9  | 12.0 | 6.1  | Single Age |
| 09SFB33-72 | 57.8  | 5.73  | 0.577  | 0.025 | 0.0718  | 0.0022 | 0.57767  | 462.0  | 16.0 | 446.9  | 13.0 | 518  | 47  | 446.9  | 13.0 | 3.3  | Single Age |
| 09SFB33-73 | 601   | 31.6  | 0.7193 | 0.017 | 0.0896  | 0.0023 | 0.67468  | 550.0  | 10.0 | 552.9  | 13.0 | 516  | 14  | 552.9  | 13.0 | -0.5 | Single Age |
| 09SFB33-74 | 705   | 6.16  | 0.39   | 0.024 | 0.034   | 0.0037 | 0.66029  | 333.0  | 17.0 | 215.0  | 23.0 | 1310 | 140 | DISC   | DISC | 35.4 | Single Age |
| 09SFB33-75 | 397   | 3.7   | 0.335  | 0.015 | 0.04648 | 0.0021 | 0.73388  | 293.2  | 12.0 | 292.8  | 13.0 | 285  | 20  | 292.8  | 13.0 | 0.1  | Single Age |
| 09SFB33-76 | 312.4 | 1.446 | 0.4084 | 0.015 | 0.05386 | 0.002  | 0.41032  | 347.5  | 11.0 | 338.2  | 12.0 | 389  | 19  | 338.2  | 12.0 | 2.7  | Single Age |
| 09SFB33-77 | 76.9  | 3.761 | 0.543  | 0.025 | 0.04399 | 0.002  | 0.47383  | 441.0  | 17.0 | 277.5  | 12.0 | 1409 | 59  | DISC   | DISC | 37.1 | Single Age |
| 09SFB33-78 | 132.3 | 2.647 | 0.3588 | 0.015 | 0.04814 | 0.002  | 0.24202  | 311.1  | 11.0 | 303.1  | 12.0 | 367  | 26  | 303.1  | 12.0 | 2.6  | Single Age |
| 09SFB33-79 | 301.6 | 6.33  | 0.636  | 0.025 | 0.0664  | 0.0025 | 0.034374 | 499.0  | 15.0 | 414.0  | 15.0 | 924  | 78  | DISC   | DISC | 17.0 | Single Age |
| 09SFB33-80 | 104.2 | 2.623 | 0.318  | 0.015 | 0.04383 | 0.002  | 0.23945  | 280.2  | 12.0 | 276.5  | 12.0 | 331  | 22  | 276.5  | 12.0 | 1.3  | Single Age |
| 09SFB33-81 | 312   | 14.85 | 0.862  | 0.027 | 0.1089  | 0.0029 | 0.84941  | 633.0  | 14.0 | 666.0  | 17.0 | 500  | 20  | 666.0  | 17.0 | -5.2 | Single Age |
| 09SFB33-82 | 409   | 3.74  | 0.365  | 0.015 | 0.04982 | 0.002  | 0.4666   | 315.8  | 11.0 | 313.4  | 12.0 | 339  | 21  | 313.4  | 12.0 | 0.8  | Single Age |
| 09SFB33-83 | 72    | 5.87  | 0.518  | 0.036 | 0.0678  | 0.005  | 0.52484  | 420.0  | 23.0 | 422.0  | 30.0 | 545  | 73  | 422.0  | 30.0 | -0.5 | Single Age |
| 09SFB33-84 | 53.7  | 6.95  | 1.119  | 0.028 | 0.1299  | 0.0027 | 0.52831  | 762.0  | 13.0 | 787.0  | 15.0 | 706  | 27  | 787.0  | 15.0 | -3.3 | Single Age |
| 09SFB33-85 | 788   | 2.249 | 0.3605 | 0.015 | 0.0491  | 0.002  | 0.54485  | 312.4  | 11.0 | 309.0  | 12.0 | 321  | 17  | 309.0  | 12.0 | 1.1  | Single Age |
| 09SFB33-86 | 132.8 | 1.768 | 0.434  | 0.018 | 0.0599  | 0.0025 | 0.13117  | 365.9  | 12.0 | 375.0  | 15.0 | 303  | 58  | 375.0  | 15.0 | -2.5 | Single Age |
| 09SFB33-87 | 59.9  | 1.794 | 0.463  | 0.027 | 0.05842 | 0.002  | 0.36336  | 385.0  | 18.0 | 366.0  | 12.0 | 461  | 71  | 366.0  | 12.0 | 4.9  | Single Age |
| 09SFB33-88 | 1270  | 3.421 | 0.1632 | 0.015 | 0.01663 | 0.0019 | 0.070897 | 153.4  | 13.0 | 106.3  | 12.0 | 994  | 89  | DISC   | DISC | 30.7 | Single Age |
| 09SFB33-89 | 220.9 | 2.07  | 0.675  | 0.022 | 0.0834  | 0.0024 | 0.81652  | 523.0  | 13.0 | 516.6  | 15.0 | 563  | 23  | 516.6  | 15.0 | 1.2  | Single Age |
| 09SFB33-90 | 221   | 3.91  | 0.3433 | 0.015 | 0.04743 | 0.0019 | 0.45168  | 299.5  | 11.0 | 298.7  | 12.0 | 325  | 17  | 298.7  | 12.0 | 0.3  | Single Age |
| 09SFB33-91 | 421   | 5.74  | 0.4871 | 0.015 | 0.06345 | 0.002  | 0.67625  | 402.8  | 10.0 | 396.6  | 12.0 | 448  | 12  | 396.6  | 12.0 |      |            |

|             |       |       |        |       |         |        |         |        |       |        |       |      |    |       |      |      |            |
|-------------|-------|-------|--------|-------|---------|--------|---------|--------|-------|--------|-------|------|----|-------|------|------|------------|
| 09SFB33-132 | 263   | 4.27  | 0.5916 | 0.016 | 0.07435 | 0.0021 | 0.57155 | 471.7  | 10.0  | 462.3  | 12.0  | 508  | 15 | 462.3 | 12.0 | 2.0  | Single Age |
| 09SFB33-133 | 45.6  | 2.52  | 0.3286 | 0.017 | 0.04524 | 0.002  | 0.10449 | 288.1  | 13.0  | 285.2  | 12.0  | 323  | 41 | 285.2 | 12.0 | 1.0  | Single Age |
| 09SFB33-134 | 210.2 | 1.973 | 0.3175 | 0.014 | 0.04369 | 0.0019 | 0.36543 | 279.9  | 11.0  | 275.6  | 12.0  | 331  | 17 | 275.6 | 12.0 | 1.5  | Single Age |
| 09SFB33-135 | 697   | 3.8   | 0.3402 | 0.015 | 0.04677 | 0.002  | 0.65477 | 297.2  | 11.0  | 294.6  | 12.0  | 312  | 14 | 294.6 | 12.0 | 0.9  | Single Age |
| 09SFB33-136 | 612   | 2.84  | 0.3403 | 0.014 | 0.04721 | 0.0019 | 0.57808 | 297.3  | 11.0  | 297.4  | 12.0  | 324  | 18 | 297.4 | 12.0 | 0.0  | Single Age |
| 09SFB33-137 | 649   | 22    | 0.5861 | 0.015 | 0.07649 | 0.0021 | 0.58072 | 468.2  | 9.7   | 475.1  | 12.0  | 448  | 16 | 475.1 | 12.0 | -1.5 | Single Age |
| 09SFB33-138 | 152.1 | 2.042 | 0.3248 | 0.015 | 0.04439 | 0.0019 | 0.1804  | 285.5  | 11.0  | 280.0  | 12.0  | 324  | 26 | 280.0 | 12.0 | 1.9  | Single Age |
| 09SFB33-139 | 407   | 5.99  | 0.648  | 0.024 | 0.0808  | 0.0027 | 0.90693 | 506.0  | 15.0  | 501.0  | 16.0  | 520  | 18 | 501.0 | 16.0 | 1.0  | Single Age |
| 09SFB33-140 | 413   | 4.02  | 0.3625 | 0.015 | 0.04732 | 0.002  | 0.58887 | 314.0  | 11.0  | 298.0  | 12.0  | 432  | 18 | 298.0 | 12.0 | 5.1  | Single Age |
| 09SFB33-141 | 1020  | 45.1  | 0.622  | 0.017 | 0.0803  | 0.0024 | 0.84441 | 491.2  | 11.0  | 498.0  | 14.0  | 466  | 15 | 498.0 | 14.0 | -1.4 | Single Age |
| 09SFB33-142 | 285   | 10    | 6.2    | 0.7   | 0.279   | 0.025  | 0.99512 | 1980.0 | 100.0 | 1580.0 | 130.0 | 2416 | 55 | DISC  | DISC | 34.6 | Single Age |
| 09SFB33-143 | 172.9 | 1.857 | 0.3365 | 0.015 | 0.04561 | 0.0019 | 0.30465 | 294.3  | 12.0  | 287.5  | 12.0  | 347  | 34 | 287.5 | 12.0 | 2.3  | Single Age |
| 09SFB33-144 | 410   | 13.12 | 0.5597 | 0.016 | 0.07202 | 0.0021 | 0.63824 | 451.2  | 10.0  | 448.2  | 13.0  | 467  | 16 | 448.2 | 13.0 | 0.7  | Single Age |
| 09SFB33-145 | 496   | 9.44  | 0.63   | 0.021 | 0.0807  | 0.0025 | 0.85072 | 496.6  | 13.0  | 500.2  | 15.0  | 492  | 20 | 500.2 | 15.0 | -0.7 | Single Age |
| 09SFB33-146 | 416   | 9.37  | 0.5753 | 0.015 | 0.0731  | 0.002  | 0.46728 | 461.4  | 9.7   | 454.8  | 12.0  | 490  | 13 | 454.8 | 12.0 | 1.4  | Single Age |

| Sample Name:     |       | 09-SFB-08               |      |                 |          |         |          |          |       |          |        |          |       |                    |          |          |              |              |  |  |  |  |  |   |  |  |  |  |  |  |  |  |  |  |  |  |  |  |  |  |  |  |  |
|------------------|-------|-------------------------|------|-----------------|----------|---------|----------|----------|-------|----------|--------|----------|-------|--------------------|----------|----------|--------------|--------------|--|--|--|--|--|---|--|--|--|--|--|--|--|--|--|--|--|--|--|--|--|--|--|--|--|
| Lower Freshwater |       | Molasse lib (21 ± 1 Ma) |      | Isotopic Ratios |          |         |          |          |       |          |        |          |       | Apparent Ages (Ma) |          |          |              |              |  |  |  |  |  |   |  |  |  |  |  |  |  |  |  |  |  |  |  |  |  |  |  |  |  |
| Grain #          | U     |                         | U/Th | 207Pb           | 2σ error | 206Pb   | 2σ error | Error    | 207Pb | 2σ error | 206Pb  | 2σ error | 207Pb | 2σ error           | Best age | 2σ error | Discordance* | Rim, Core or |  |  |  |  |  |   |  |  |  |  |  |  |  |  |  |  |  |  |  |  |  |  |  |  |  |
|                  | (ppm) |                         |      | 235U            | (abs.)   | 238U    | (abs.)   | Corr.    |       | 235U     | (Ma)   | 238U     | (Ma)  | 206Pb              | (Ma)     | (Ma)     | (Ma)         |              |  |  |  |  |  | % |  |  |  |  |  |  |  |  |  |  |  |  |  |  |  |  |  |  |  |
| SFB08_1          | 524   | 3.189                   |      | 0.3371          | 0.0035   | 0.04605 | 0.00033  | 0.53981  | 295   | 2.7      | 290.2  | 2        | 329   | 22                 | 290.2    | 2.0      | 1.6          | Single Age   |  |  |  |  |  |   |  |  |  |  |  |  |  |  |  |  |  |  |  |  |  |  |  |  |  |
| SFB08_2          | 764   | 1.57                    |      | 0.3361          | 0.0025   | 0.04618 | 0.00032  | 0.59651  | 294.2 | 1.9      | 291    | 1.9      | 319   | 13                 | 291.0    | 1.9      | 1.1          | Single Age   |  |  |  |  |  |   |  |  |  |  |  |  |  |  |  |  |  |  |  |  |  |  |  |  |  |
| SFB08_3          | 1360  | 10.42                   |      | 0.686           | 0.012    | 0.0824  | 0.0013   | 0.92914  | 530.4 | 7        | 510.1  | 7.7      | 624   | 15                 | 510.1    | 7.7      | 3.8          | Single Age   |  |  |  |  |  |   |  |  |  |  |  |  |  |  |  |  |  |  |  |  |  |  |  |  |  |
| SFB08_4          | 319   | 1.366                   |      | 1.0637          | 0.0065   | 0.12006 | 0.00085  | 0.55714  | 735.5 | 3.2      | 731.5  | 4.8      | 750   | 13                 | 731.5    | 4.8      | 0.5          | Single Age   |  |  |  |  |  |   |  |  |  |  |  |  |  |  |  |  |  |  |  |  |  |  |  |  |  |
| SFB08_5          | 1076  | 2.321                   |      | 0.3246          | 0.0043   | 0.03447 | 0.00046  | 0.13725  | 285.4 | 3.3      | 218.4  | 2.9      | 865   | 38                 | DISC     | DISC     | 23.5         | Single Age   |  |  |  |  |  |   |  |  |  |  |  |  |  |  |  |  |  |  |  |  |  |  |  |  |  |
| SFB08_6          | 20.48 | 0.3868                  |      | 3.339           | 0.052    | 0.07484 | 0.00097  | 0.37978  | 1489  | 12       | 465.2  | 5.8      | 3576  | 24                 | DISC     | DISC     | 68.8         | Single Age   |  |  |  |  |  |   |  |  |  |  |  |  |  |  |  |  |  |  |  |  |  |  |  |  |  |
| SFB08_7          | 168.7 | 1.344                   |      | 0.3162          | 0.0034   | 0.04311 | 0.00035  | 0.3963   | 279.2 | 2.6      | 272.1  | 2.1      | 319   | 26                 | 272.1    | 2.1      | 2.5          | Single Age   |  |  |  |  |  |   |  |  |  |  |  |  |  |  |  |  |  |  |  |  |  |  |  |  |  |
| SFB08_8          | 621   | 6.5                     |      | 0.372           | 0.016    | 0.0421  | 0.0015   | 0.53116  | 320   | 12       | 265.6  | 9        | 765   | 57                 | DISC     | DISC     | 17.0         | Single Age   |  |  |  |  |  |   |  |  |  |  |  |  |  |  |  |  |  |  |  |  |  |  |  |  |  |
| SFB08_9          | 479   | 6.75                    |      | 1.907           | 0.025    | 0.1787  | 0.0026   | 0.66069  | 1083  | 8.8      | 1060   | 14       | 1117  | 18                 | 1117.0   | 18.0     | 5.1          | Rim          |  |  |  |  |  |   |  |  |  |  |  |  |  |  |  |  |  |  |  |  |  |  |  |  |  |
| SFB08_9          | 89.2  | 2.788                   |      | 2.132           | 0.022    | 0.1979  | 0.0019   | 0.58986  | 1159  | 7.2      | 1165.2 | 9.9      | 1156  | 16                 | 1156.0   | 16.0     | -0.8         | Core         |  |  |  |  |  |   |  |  |  |  |  |  |  |  |  |  |  |  |  |  |  |  |  |  |  |
| SFB08_10         | 1580  | 9.2                     |      | 0.577           | 0.014    | 0.0734  | 0.002    | 0.96333  | 462.3 | 9.3      | 456    | 12       | 498   | 16                 | 456.0    | 12.0     | 1.4          | Rim          |  |  |  |  |  |   |  |  |  |  |  |  |  |  |  |  |  |  |  |  |  |  |  |  |  |
| SFB08_10         | 80.2  | 0.998                   |      | 0.802           | 0.012    | 0.09755 | 0.00078  | 0.48512  | 597.5 | 6.9      | 600    | 4.6      | 578   | 30                 | 600.0    | 4.6      | -0.4         | Core         |  |  |  |  |  |   |  |  |  |  |  |  |  |  |  |  |  |  |  |  |  |  |  |  |  |
| SFB08_11         | 5150  | 2.184                   |      | 0.906           | 0.08     | 0.0259  | 0.0035   | -0.5101  | 653   | 44       | 165    | 22       | 3330  | 230                | DISC     | DISC     | 74.7         | Rim          |  |  |  |  |  |   |  |  |  |  |  |  |  |  |  |  |  |  |  |  |  |  |  |  |  |
| SFB08_11         | 2159  | 1.787                   |      | 0.395           | 0.021    | 0.039   | 0.0004   | 0.42322  | 337   | 15       | 246.6  | 2.5      | 993   | 92                 | DISC     | DISC     | 26.8         | Core         |  |  |  |  |  |   |  |  |  |  |  |  |  |  |  |  |  |  |  |  |  |  |  |  |  |
| SFB08_12         | 3160  | 3.61                    |      | 0.2221          | 0.0094   | 0.0283  | 0.001    | -0.27402 | 203.6 | 7.8      | 180    | 6.3      | 427   | 97                 | DISC     | DISC     | 11.6         | Rim          |  |  |  |  |  |   |  |  |  |  |  |  |  |  |  |  |  |  |  |  |  |  |  |  |  |
| SFB08_12         | 699   | 1.959                   |      | 0.3379          | 0.0055   | 0.04583 | 0.00069  | 0.87515  | 296.1 | 4.2      | 288.9  | 4.3      | 341   | 16                 | 288.9    | 4.3      | 2.4          | Core         |  |  |  |  |  |   |  |  |  |  |  |  |  |  |  |  |  |  |  |  |  |  |  |  |  |
| SFB08_13         | 371   | 1.683                   |      | 0.3438          | 0.004    | 0.04729 | 0.00044  | 0.51548  | 300   | 3        | 297.9  | 2.7      | 313   | 23                 | 297.9    | 2.7      | 0.7          | Single Age   |  |  |  |  |  |   |  |  |  |  |  |  |  |  |  |  |  |  |  |  |  |  |  |  |  |
| SFB08_14         | 267   | 1.95                    |      | 0.369           | 0.0042   | 0.04999 | 0.00055  | 0.33007  | 318.9 | 3.1      | 314.4  | 3.3      | 337   | 26                 | 314.4    | 3.3      | 1.4          | Single Age   |  |  |  |  |  |   |  |  |  |  |  |  |  |  |  |  |  |  |  |  |  |  |  |  |  |
| SFB08_15         | 2177  | 1.95                    |      | 0.195           | 0.01     | 0.02426 | 0.00093  | 0.828    | 180.7 | 8.5      | 154.5  | 5.9      | 559   | 52                 | DISC     | DISC     | 14.5         | Rim          |  |  |  |  |  |   |  |  |  |  |  |  |  |  |  |  |  |  |  |  |  |  |  |  |  |
| SFB08_15         | 671   | 2.255                   |      | 0.3281          | 0.0035   | 0.0432  | 0.00033  | 0.45022  | 288.1 | 2.7      | 272.6  | 2        | 414   | 22                 | 272.6    | 2.0      | 5.4          | Core         |  |  |  |  |  |   |  |  |  |  |  |  |  |  |  |  |  |  |  |  |  |  |  |  |  |
| SFB08_16         | 329.6 | 1.08                    |      | 0.3159          | 0.0062   | 0.04358 | 0.00069  | 0.70964  | 279.2 | 4.7      | 274.9  | 4.2      | 296   | 31                 | 274.9    | 4.2      | 1.5          | Single Age   |  |  |  |  |  |   |  |  |  |  |  |  |  |  |  |  |  |  |  |  |  |  |  |  |  |
| SFB08_17         | 500   | 6.21                    |      | 1.398           | 0.014    | 0.1398  | 0.0011   | 0.73814  | 887.9 | 5.9      | 844.1  | 6.5      | 1000  | 15                 | 844.1    | 6.5      | 4.9          | Rim          |  |  |  |  |  |   |  |  |  |  |  |  |  |  |  |  |  |  |  |  |  |  |  |  |  |
| SFB08_17         | 327.7 | 4.84                    |      | 1.613           | 0.018    | 0.1591  | 0.0014   | 0.72717  | 975.2 | 7        | 951.5  | 7.6      | 1023  | 15                 | 1023.0   | 15.0     | 7.0          | Core         |  |  |  |  |  |   |  |  |  |  |  |  |  |  |  |  |  |  |  |  |  |  |  |  |  |
| SFB08_18         | 219   | 4.08                    |      | 0.5108          | 0.0073   | 0.0686  | 0.001    | 0.53696  | 418.9 | 4.9      | 427.4  | 6.1      | 412   | 34                 | 427.4    | 6.1      | -2.0         | Single Age   |  |  |  |  |  |   |  |  |  |  |  |  |  |  |  |  |  |  |  |  |  |  |  |  |  |
| SFB08_19         | 693   | 1.15                    |      | 0.3339          | 0.0044   | 0.04443 | 0.0003   | 0.53137  | 292.4 | 3.3      | 280.2  | 1.9      | 389   | 27                 | 280.2    | 1.9      | 4.2          | Single Age   |  |  |  |  |  |   |  |  |  |  |  |  |  |  |  |  |  |  |  |  |  |  |  |  |  |
| SFB08_21         | 763   | 2.5                     |      | 0.3329          | 0.0029   | 0.04606 | 0.00028  | 0.53576  | 291.7 | 2.2      | 290.3  | 1.7      | 307   | 17                 | 290.3    | 1.7      | 0.5          | Single Age   |  |  |  |  |  |   |  |  |  |  |  |  |  |  |  |  |  |  |  |  |  |  |  |  |  |
| SFB08_22         | 997   | 1.09                    |      | 0.336           | 0.0053   | 0.0412  | 0.00093  | 0.30347  | 294.7 | 3.8      | 260.3  | 5.7      | 574   | 51                 | DISC     | DISC     | 11.7         | Single Age   |  |  |  |  |  |   |  |  |  |  |  |  |  |  |  |  |  |  |  |  |  |  |  |  |  |
| SFB08_23         | 219   | 1.38                    |      | 0.3535          | 0.0053   | 0.04706 | 0.00044  | 0.59553  | 307.2 | 4        | 296.5  | 2.7      | 363   | 29                 | 296.5    | 2.7      | 3.5          | Single Age   |  |  |  |  |  |   |  |  |  |  |  |  |  |  |  |  |  |  |  |  |  |  |  |  |  |
| SFB08_24         | 309   | 1.9                     |      | 0.3327          | 0.0042   | 0.04607 | 0.0004   | 0.67668  | 291.5 | 3.2      | 290.4  | 2.5      | 299   | 20                 | 290.4    | 2.5      | 0.4          | Single Age   |  |  |  |  |  |   |  |  |  |  |  |  |  |  |  |  |  |  |  |  |  |  |  |  |  |
| SFB08_25         | 602   | 1.472                   |      | 0.3246          | 0.0029   | 0.04455 | 0.00042  | 0.2109   | 285.4 | 2.2      | 281    | 2.6      | 326   | 24                 | 281.0    | 2.6      | 1.5          | Single Age   |  |  |  |  |  |   |  |  |  |  |  |  |  |  |  |  |  |  |  |  |  |  |  |  |  |
| SFB08_26         | 304.5 | 1.035                   |      | 0.6824          | 0.0064   | 0.08447 | 0.00081  | 0.39103  | 528.2 | 3.8      | 522.7  | 4.8      | 534   | 23                 | 522.7    | 4.8      | 1.0          | Single Age   |  |  |  |  |  |   |  |  |  |  |  |  |  |  |  |  |  |  |  |  |  |  |  |  |  |
| SFB08_27         | 761   | 108                     |      | 0.4135          | 0.0055   | 0.05562 | 0.00069  | 0.29551  | 351.4 | 3.9      | 348.9  | 4.2      | 356   | 31                 | 348.9    | 4.2      | 0.7          | Rim          |  |  |  |  |  |   |  |  |  |  |  |  |  |  |  |  |  |  |  |  |  |  |  |  |  |
| SFB08_27         | 205   | 4.3                     |      | 0.5304          | 0.0056   | 0.06972 | 0.00075  | 0.63847  | 432   | 3.7      | 434.4  | 4.5      | 410   | 23                 | 434.4    | 4.5      | -0.6         | Core         |  |  |  |  |  |   |  |  |  |  |  |  |  |  |  |  |  |  |  |  |  |  |  |  |  |
| SFB08_28         | 662   | 2.49                    |      | 0.382           | 0.0043   | 0.05157 | 0.00052  | 0.66503  | 328.5 | 3.1      | 324.1  | 3.2      | 374   | 20                 | 324.1    | 3.2      | 1.3          | Single Age   |  |  |  |  |  |   |  |  |  |  |  |  |  |  |  |  |  |  |  |  |  |  |  |  |  |
| SFB08_29         | 1180  | 1.345                   |      | 0.318           | 0.0044   | 0.04398 | 0.00051  | 0.22262  | 280.4 | 3.4      | 277.5  | 3.1      | 311   | 31                 | 277.5    | 3.1      | 1.0          | Single Age   |  |  |  |  |  |   |  |  |  |  |  |  |  |  |  |  |  |  |  |  |  |  |  |  |  |
| SFB08_30         | 1747  | 3.261                   |      | 0.312           | 0.003    | 0.04251 | 0.00032  | 0.52009  | 275.7 | 2.3      | 268.4  | 2        | 348   | 18                 | 268.4    | 2.0      | 2.6          | Single Age   |  |  |  |  |  |   |  |  |  |  |  |  |  |  |  |  |  |  |  |  |  |  |  |  |  |
| SFB08_31         | 416.5 | 1.618                   |      | 0.3268          | 0.004    | 0.04481 | 0.00035  | 0.70997  | 287   | 3        | 282.9  | 2.2      | 311   | 21                 | 282.9    | 2.2      | 1.4          | Single Age   |  |  |  |  |  |   |  |  |  |  |  |  |  |  |  |  |  |  |  |  |  |  |  |  |  |
| SFB08_32         | 79.7  | 0.968                   |      | 1.651           | 0.017    | 0.1651  | 0.0014   | 0.56298  | 989.6 | 6.6      | 984.8  | 7.7      | 1007  | 19                 | 1007.0   | 19.0     | 2.2          | Single Age   |  |  |  |  |  |   |  |  |  |  |  |  |  |  |  |  |  |  |  |  |  |  |  |  |  |
| SFB08_33         | 620   | 2.83                    |      | 0.3566          | 0.0038   | 0.04891 | 0.00037  | 0.52256  | 309.6 | 2.8      | 307.8  | 2.2      | 326   | 20                 | 307.8    | 2.2      | 0.6          | Single Age   |  |  |  |  |  |   |  |  |  |  |  |  |  |  |  |  |  |  |  |  |  |  |  |  |  |
| SFB08_34         | 364   | 1.32                    |      | 0.3289          | 0.0036   | 0.04557 | 0.0004   | 0.62999  | 288.7 | 2.7      | 287.2  | 2.5      | 295   | 21                 | 287.2    | 2.5      | 0.5          | Single Age   |  |  |  |  |  |   |  |  |  |  |  |  |  |  |  |  |  |  |  |  |  |  |  |  |  |
| SFB08_35         | 451   | 1.441                   |      | 0.3223          | 0.0037   | 0.04442 | 0.00041  | 0.54377  | 283.6 | 2.8      | 280.1  | 2.5      | 306   | 20                 | 280.1    | 2.5      | 1.2          | Single Age   |  |  |  |  |  |   |  |  |  |  |  |  |  |  |  |  |  |  |  |  |  |  |  |  |  |
| SFB08_36         | 389   | 2.42                    |      | 0.4005          | 0.0043   | 0.047   | 0.00051  | 0.10085  | 342   | 3.1      | 296    | 3.2      | 679   | 31                 | DISC     | DISC     | 13.5         | Single Age   |  |  |  |  |  |   |  |  |  |  |  |  |  |  |  |  |  |  |  |  |  |  |  |  |  |
| SFB08_37         | 2270  | 1.961                   |      | 0.298           | 0.0023   | 0.03989 | 0.00025  | 0.48108  | 264.8 | 1.8      | 252.2  | 1.5      | 386   | 14                 | 252.2    | 1.5      | 4.8          | Single Age   |  |  |  |  |  |   |  |  |  |  |  |  |  |  |  |  |  |  |  |  |  |  |  |  |  |
| SFB08_38         | 577   | 31.2                    |      | 0.3786          | 0.0089   | 0.0493  | 0.0013   | 0.66817  | 325.9 | 6.5      | 310.5  | 8.3      | 414   | 54                 | 310.5    | 8.3      | 4.7          | Rim          |  |  |  |  |  |   |  |  |  |  |  |  |  |  |  |  |  |  |  |  |  |  |  |  |  |
| SFB08_38         | 318.5 | 0.985                   |      | 0.8445          | 0.0094   | 0.1005  | 0.0011   | 0.69985  | 621.5 | 5.2      | 617.3  | 6.6      | 640   | 20                 | 617.3    | 6.6      | 0.7          | Core         |  |  |  |  |  |   |  |  |  |  |  |  |  |  |  |  |  |  |  |  |  |  |  |  |  |
| SFB08_39         | 244.4 | 7.24                    |      | 0.948           | 0.01     | 0.10987 | 0.00078  | 0.37381  | 677   | 5.3      | 672    | 4.5      | 693   | 20                 | 672.0    | 4.5      | 0.7          | Single Age   |  |  |  |  |  |   |  |  |  |  |  |  |  |  |  |  |  |  |  |  |  |  |  |  |  |
| SFB08_40         | 556   | 2.259                   |      | 0.326           | 0.0037   | 0.04481 | 0.00037  | 0.31558  | 286.2 | 2.8      | 282.6  | 2.3      | 306   | 20                 | 282.6    | 2.3      | 1.4          | Single Age   |  |  |  |  |  |   |  |  |  |  |  |  |  |  |  |  |  |  |  |  |  |  |  |  |  |
| SFB08_41         | 50.43 | 1.594                   |      | 0.893           | 0.015    | 0.1065  | 0.0016   | 0.16697  | 650.3 | 8.9      | 652.4  | 9.1      | 627   | 47                 | 652.4    | 9.1      | -0.3         | Single Age   |  |  |  |  |  |   |  |  |  |  |  |  |  |  |  |  |  |  |  |  |  |  |  |  |  |
| SFB08_42         | 612   | 1.48                    |      | 0.5764          | 0.0053   | 0.07334 | 0.00061  | 0.63191  | 462   | 3.4      | 456.2  | 3.6      | 483   | 15                 | 456.2    | 3.6      | 1.3          | Single Age   |  |  |  |  |  |   |  |  |  |  |  |  |  |  |  |  |  |  |  |  |  |  |  |  |  |
| SFB08_43         | 1240  | 1.45                    |      | 0.7812          | 0.008    | 0.0918  | 0.001    | 0.92043  | 586.1 | 4.5      | 566    | 6        | 657   | 12                 | 566.0    | 6.0      | 3.4          | Single Age   |  |  |  |  |  |   |  |  |  |  |  |  |  |  |  |  |  |  |  |  |  |  |  |  |  |
| SFB08_44         | 740   | 10.8                    |      | 0.566           | 0.01     | 0.0721  | 0.0011   | 0.87645  | 456   | 6.2      | 449    | 6.8      | 489   | 19                 | 449.0    | 6.8      | 1.5          | Single Age   |  |  |  |  |  |   |  |  |  |  |  |  |  |  |  |  |  |  |  |  |  |  |  |  |  |
| SFB08_45         | 921   | 2.7                     |      |                 |          |         |          |          |       |          |        |          |       |                    |          |          |              |              |  |  |  |  |  |   |  |  |  |  |  |  |  |  |  |  |  |  |  |  |  |  |  |  |  |

|                                            |         |       |                    |          |         |          |          |       |          |        |          |        |          |          |          |              |              |
|--------------------------------------------|---------|-------|--------------------|----------|---------|----------|----------|-------|----------|--------|----------|--------|----------|----------|----------|--------------|--------------|
| SFB08_83                                   | 216     | 1.318 | 0.3577             | 0.0034   | 0.04979 | 0.0004   | 0.4504   | 310.8 | 2.6      | 313.2  | 2.5      | 305    | 24       | 313.2    | 2.5      | -0.8         | Single Age   |
| SFB08_84                                   | 528     | 109   | 0.3402             | 0.0092   | 0.04681 | 0.00094  | 0.6435   | 297.3 | 7        | 294.9  | 5.8      | 305    | 46       | 294.9    | 5.8      | 0.8          | Rim          |
| SFB08_84                                   | 67.9    | 1.826 | 1.91               | 0.023    | 0.1845  | 0.0016   | 0.67953  | 1084  | 8        | 1091.5 | 8.9      | 1066   | 18       | 1066.0   | 18.0     | -2.4         | Core         |
| SFB08_85                                   | 2230    | 4.37  | 0.3289             | 0.0022   | 0.04493 | 0.00035  | 0.74702  | 288.7 | 1.7      | 283.3  | 2.1      | 339    | 11       | 283.3    | 2.1      | 1.9          | Single Age   |
| SFB08_86                                   | 350     | 2.237 | 0.3806             | 0.0037   | 0.05032 | 0.00037  | 0.41058  | 327.5 | 2.7      | 316.5  | 2.3      | 416    | 22       | 316.5    | 2.3      | 3.4          | Single Age   |
| SFB08_87                                   | 391     | 2.066 | 0.3497             | 0.0047   | 0.04771 | 0.00056  | 0.69761  | 304.4 | 3.6      | 300.4  | 3.5      | 327    | 23       | 300.4    | 3.5      | 1.3          | Single Age   |
| SFB08_88                                   | 195.4   | 0.869 | 0.8766             | 0.008    | 0.10281 | 0.00068  | 0.32992  | 639   | 4.3      | 630.9  | 4        | 663    | 21       | 630.9    | 4.0      | 1.3          | Single Age   |
| SFB08_89                                   | 796     | 2.558 | 0.336              | 0.0028   | 0.04585 | 0.0003   | 0.59702  | 294.1 | 2.1      | 289    | 1.9      | 346    | 14       | 289.0    | 1.9      | 1.7          | Single Age   |
| SFB08_90                                   | 517     | 1.179 | 0.3257             | 0.0025   | 0.04493 | 0.00032  | 0.41861  | 286.2 | 1.9      | 283.3  | 2        | 332    | 16       | 283.3    | 2.0      | 1.0          | Single Age   |
| SFB08_92                                   | 1910    | 2.705 | 0.2547             | 0.0058   | 0.03515 | 0.0008   | 0.95522  | 230.3 | 4.7      | 222.7  | 5        | 304    | 18       | 222.7    | 5.0      | 3.3          | Single Age   |
| SFB08_93                                   | 287     | 0.889 | 0.2728             | 0.0049   | 0.03893 | 0.00063  | 0.52828  | 244.7 | 3.9      | 246.2  | 3.9      | 228    | 31       | 246.2    | 3.9      | -0.6         | Single Age   |
| SFB08_94                                   | 248     | 5.38  | 0.752              | 0.018    | 0.0831  | 0.0014   | 0.80539  | 569   | 11       | 514.8  | 8.1      | 804    | 30       | 514.8    | 8.1      | 9.5          | Single Age   |
| SFB08_96                                   | 228     | 1.008 | 0.8515             | 0.0063   | 0.09992 | 0.00083  | 0.46441  | 625.4 | 3.5      | 613.9  | 4.9      | 660    | 20       | 613.9    | 4.9      | 1.8          | Single Age   |
| SFB08_97                                   | 260.8   | 4.83  | 0.8106             | 0.0086   | 0.09805 | 0.00094  | 0.43106  | 602.7 | 4.8      | 603    | 5.5      | 601    | 23       | 603.0    | 5.5      | 0.0          | Rim          |
| SFB08_97                                   | 192.7   | 5.81  | 0.87               | 0.013    | 0.10415 | 0.00085  | 0.47701  | 637   | 7.8      | 638.7  | 4.9      | 607    | 30       | 638.7    | 4.9      | -0.3         | Core         |
| SFB08_99                                   | 579     | 1.352 | 0.3182             | 0.0023   | 0.04361 | 0.00041  | 0.57483  | 280.5 | 1.7      | 275.2  | 2.5      | 298    | 20       | 275.2    | 2.5      | 1.9          | Single Age   |
| SFB08_100                                  | 208     | 1.11  | 0.5444             | 0.0058   | 0.07004 | 0.0006   | 0.40977  | 441.2 | 3.8      | 436.4  | 3.6      | 474    | 24       | 436.4    | 3.6      | 1.1          | Single Age   |
| SFB08_101                                  | 3060    | 2.929 | 0.208              | 0.015    | 0.0269  | 0.0022   | 0.98449  | 190   | 13       | 171    | 14       | 456    | 25       | DISC     | DISC     | 10.0         | Single Age   |
| SFB08_102                                  | 238     | 5.28  | 0.6239             | 0.0056   | 0.07928 | 0.00049  | 0.3571   | 492.2 | 3.5      | 491.8  | 2.9      | 489    | 20       | 491.8    | 2.9      | 0.1          | Single Age   |
| SFB08_103                                  | 787     | 1.97  | 0.3334             | 0.0036   | 0.0441  | 0.00038  | 0.041303 | 292.1 | 2.8      | 278.2  | 2.4      | 395    | 27       | 278.2    | 2.4      | 4.8          | Single Age   |
| SFB08_104                                  | 925     | 1.953 | 0.3139             | 0.0034   | 0.04219 | 0.0003   | 0.1988   | 277.2 | 2.6      | 266.4  | 1.9      | 358    | 21       | 266.4    | 1.9      | 3.9          | Single Age   |
| SFB08_105                                  | 1791    | 1.4   | 0.3252             | 0.0043   | 0.04207 | 0.00046  | 0.78128  | 286.2 | 3.4      | 265.6  | 2.8      | 461    | 19       | 265.6    | 2.8      | 7.2          | Single Age   |
| SFB08_108                                  | 2415    | 7.41  | 0.274              | 0.011    | 0.0372  | 0.0011   | 0.7338   | 246.1 | 8.9      | 235.5  | 6.9      | 344    | 49       | 235.5    | 6.9      | 4.3          | Rim          |
| SFB08_108                                  | 206     | 1.697 | 0.3943             | 0.0092   | 0.05071 | 0.00066  | 0.6241   | 337.2 | 6.7      | 318.9  | 4        | 455    | 36       | 318.9    | 4.0      | 5.4          | Core         |
| SFB08_109                                  | 258.5   | 3.96  | 0.629              | 0.019    | 0.0666  | 0.0011   | 0.4368   | 495   | 12       | 415.5  | 6.8      | 898    | 60       | DISC     | DISC     | 16.1         | Single Age   |
| SFB08_110                                  | 817     | 2.522 | 0.3386             | 0.0035   | 0.042   | 0.00056  | 0.56749  | 296.1 | 2.7      | 265.2  | 3.4      | 556    | 29       | DISC     | DISC     | 10.4         | Single Age   |
| SFB08_111                                  | 191     | 5.39  | 0.5766             | 0.007    | 0.0742  | 0.00069  | 0.57503  | 462.1 | 4.5      | 461.4  | 4.1      | 458    | 21       | 461.4    | 4.1      | 0.2          | Single Age   |
| SFB08_112                                  | 964     | 3.361 | 5.869              | 0.053    | 0.3539  | 0.0036   | 0.78074  | 1957  | 7.9      | 1953   | 17       | 1959   | 15       | 1959.0   | 15.0     | 0.3          | Single Age   |
| SFB08_113                                  | 96.9    | 0.724 | 1.142              | 0.012    | 0.12868 | 0.00094  | 0.33302  | 773.2 | 5.9      | 780.3  | 5.4      | 777    | 25       | 780.3    | 5.4      | -0.9         | Single Age   |
| SFB08_114                                  | 794.6   | 2.911 | 0.3267             | 0.0024   | 0.04428 | 0.00028  | 0.38045  | 287   | 1.9      | 279.3  | 1.7      | 346    | 18       | 279.3    | 1.7      | 2.7          | Single Age   |
| SFB08_115                                  | 418     | 1.194 | 0.3362             | 0.0039   | 0.04656 | 0.00054  | 0.7392   | 294.2 | 3        | 293.4  | 3.3      | 317    | 19       | 293.4    | 3.3      | 0.3          | Single Age   |
| SFB08_116                                  | 239     | 6.04  | 2.19               | 0.014    | 0.2016  | 0.0013   | 0.71283  | 1178  | 4.3      | 1183.6 | 7.1      | 1169.6 | 9.2      | 1169.6   | 9.2      | -1.2         | Single Age   |
| SFB08_117                                  | 594     | 1.86  | 0.3273             | 0.0025   | 0.04472 | 0.00026  | 0.38078  | 287.5 | 1.9      | 282    | 1.6      | 320    | 18       | 282.0    | 1.6      | 1.9          | Single Age   |
| SFB08_119                                  | 309.4   | 1.938 | 0.3678             | 0.004    | 0.05041 | 0.00041  | 0.39527  | 318   | 2.9      | 317    | 2.5      | 328    | 23       | 317.0    | 2.5      | 0.3          | Single Age   |
| SFB08_120                                  | 1189    | 2.241 | 0.3141             | 0.0029   | 0.03995 | 0.00042  | 0.741177 | 277.3 | 2.2      | 252.5  | 2.6      | 496    | 14       | 252.5    | 2.6      | 8.9          | Single Age   |
| Sample Name: 09-SFB-13                     |         |       |                    |          |         |          |          |       |          |        |          |        |          |          |          |              |              |
| Upper Freshwater Molasse lib (20.5 ± 1 Ma) |         |       |                    |          |         |          |          |       |          |        |          |        |          |          |          |              |              |
| U                                          |         |       | Isotopic Ratios    |          |         |          |          |       |          |        |          |        |          |          |          |              |              |
| U/Th                                       |         |       | Apparent Ages (Ma) |          |         |          |          |       |          |        |          |        |          |          |          |              |              |
| Grain #                                    | (ppm)   |       | 207Pb              | 2σ error | 206Pb   | 2σ error | Error    | 207Pb | 2σ error | 206Pb  | 2σ error | 207Pb  | 2σ error | Best age | 2σ error | Discordance* | Rim, Core or |
|                                            |         |       | 235U               | (abs.)   | 238U    | (abs.)   | Corr.    | 235U  | (Ma)     | 238U   | (Ma)     | 206Pb  | (Ma)     | (Ma)     | (Ma)     | %            | Single Age   |
| 09SFB13_b1                                 | 337.00  | 2.07  | 0.3363             | 0.0051   | 0.04655 | 0.00055  | 0.344    | 294.2 | 3.8      | 293.3  | 3.4      | 319    | 33       | 293.3    | 3.4      | 0.3          | Single Age   |
| 09SFB13_b2                                 | 488.00  | 2.76  | 0.3556             | 0.0077   | 0.04878 | 0.00048  | 0.286    | 308.7 | 5.7      | 307    | 3        | 338    | 47       | 307.0    | 3.0      | 0.6          | Single Age   |
| 09SFB13_b3                                 | 81.90   | 0.95  | 0.8030             | 0.0190   | 0.09770 | 0.00120  | 0.259    | 598   | 11       | 600.7  | 7.1      | 594    | 50       | 600.7    | 7.1      | -0.5         | Single Age   |
| 09SFB13_b4                                 | 343.00  | 1.13  | 0.2902             | 0.0068   | 0.03370 | 0.00130  | 0.588    | 258.7 | 5.4      | 213.8  | 7.9      | 634    | 72       | DISC     | DISC     | 17.4         | Single Age   |
| 09SFB13_b5                                 | 186.00  | 1.64  | 0.3252             | 0.0070   | 0.04560 | 0.00058  | 0.310    | 286.5 | 5.5      | 287.4  | 3.6      | 283    | 47       | 287.4    | 3.6      | -0.3         | Single Age   |
| 09SFB13_b6                                 | 560.00  | 1.58  | 0.3401             | 0.0046   | 0.04632 | 0.00053  | 0.368    | 297.2 | 3.5      | 291.9  | 3.3      | 357    | 29       | 291.9    | 3.3      | 1.8          | Single Age   |
| 09SFB13_b7                                 | 1670.00 | 9.25  | 0.2922             | 0.0069   | 0.03849 | 0.00052  | 0.590    | 260.2 | 5.4      | 243.5  | 3.2      | 429    | 44       | 243.5    | 3.2      | 6.4          | Single Age   |
| 09SFB13_b8                                 | 293.00  | 1.98  | 0.3234             | 0.0048   | 0.04452 | 0.00031  | 0.083    | 284.5 | 3.7      | 280.8  | 1.9      | 334    | 39       | 280.8    | 1.9      | 1.3          | Single Age   |
| 09SFB13_b9                                 | 489.00  | 1.21  | 0.3318             | 0.0030   | 0.04655 | 0.00038  | 0.457    | 291.2 | 2.2      | 293.3  | 2.4      | 292    | 20       | 293.3    | 2.4      | -0.7         | Single Age   |
| 09SFB13_b10                                | 1530.00 | 2.72  | 0.3377             | 0.0061   | 0.04654 | 0.00081  | 0.733    | 295.2 | 4.7      | 293.2  | 5        | 328    | 26       | 293.2    | 5.0      | 0.7          | Single Age   |
| 09SFB13_b11                                | 720.00  | 0.73  | 0.3452             | 0.0062   | 0.03307 | 0.00082  | 0.077    | 301   | 4.7      | 209.7  | 5.1      | 1062   | 59       | DISC     | DISC     | 30.3         | Single Age   |
| 09SFB13_b12                                | 16.78   | 0.14  | 1.8090             | 0.0530   | 0.04830 | 0.00140  | 0.013    | 1055  | 21       | 304    | 8.8      | 3259   | 74       | DISC     | DISC     | 71.2         | Single Age   |
| 09SFB13_b13                                | 423.00  | 1.46  | 0.3276             | 0.0084   | 0.04413 | 0.00085  | 0.120    | 287.7 | 6.5      | 278.4  | 5.3      | 278    | 74       | 278.4    | 5.3      | 3.2          | Single Age   |
| 09SFB13_b14                                | 526.00  | 1.59  | 0.3370             | 0.0047   | 0.04677 | 0.00057  | 0.652    | 294.8 | 3.5      | 294.7  | 3.5      | 291    | 24       | 294.7    | 3.5      | 0.0          | Single Age   |
| 09SFB13_b15                                | 289.00  | 1.69  | 0.3415             | 0.0046   | 0.04790 | 0.00044  | 0.266    | 298.2 | 3.5      | 301.6  | 2.7      | 273    | 29       | 301.6    | 2.7      | -1.1         | Single Age   |
| 09SFB13_b16                                | 325.00  | 1.84  | 0.7690             | 0.0110   | 0.09330 | 0.00120  | 0.729    | 580.5 | 6.2      | 575    | 6.8      | 612    | 21       | 575.0    | 6.8      | 0.9          | Single Age   |
| 09SFB13_b17                                | 1480.00 | 3.11  | 0.3430             | 0.0120   | 0.04610 | 0.00120  | 0.373    | 299.6 | 8.8      | 290.8  | 7.3      | 356    | 64       | 290.8    | 7.3      | 2.9          | Single Age   |
| 09SFB13_b18                                | 384.00  | 2.56  | 0.3441             | 0.0045   | 0.04692 | 0.00046  | 0.414    | 300.7 | 3.5      | 295.6  | 2.8      | 339    | 28       | 295.6    | 2.8      | 1.7          | Single Age   |
| 09SFB13_b19                                | 294.00  | 1.63  | 0.3574             | 0.0062   | 0.04897 | 0.00065  | 0.345    | 310.1 | 4.6      | 308.2  | 4        | 322    | 35       | 308.2    | 4.0      | 0.6          | Single Age   |
| 09SFB13_b20                                | 661.00  | 2.30  | 0.3355             | 0.0037   | 0.04701 | 0.00047  | 0.641    | 294.1 | 2.9      | 296.1  | 2.9      | 293    | 24       | 296.1    | 2.9      | -0.7         | Single Age   |
| 09SFB13_b21                                | 1084.00 | 1.21  | 0.2781             | 0.0058   | 0.03530 | 0.00047  | 0.522    | 249   | 4.6      | 223.6  | 5        | 465    | 44       | DISC     | DISC     | 10.2         | Single Age   |
| 09SFB13_b22                                | 126.60  | 1.75  | 0.3104             | 0.0057   | 0.04337 | 0.00051  | 0.205    | 274.3 | 4.4      | 273.7  | 3.1      | 281    | 42       | 273.7    | 3.1      | 0.2          | Single Age   |
| 09SFB13_b23                                | 360.00  | 2.15  | 0.5740             | 0.0460   | 0.04655 | 0.00061  | 0.602    | 455   | 29       | 293.3  | 3.8      | 1330   | 140      | DISC     | DISC     | 35.5         | Single Age   |
| 09SFB1                                     |         |       |                    |          |         |          |          |       |          |        |          |        |          |          |          |              |              |

|            |       |       |        |        |         |         |         |        |      |       |      |      |    |       |      |      |            |
|------------|-------|-------|--------|--------|---------|---------|---------|--------|------|-------|------|------|----|-------|------|------|------------|
| 09SFB13-28 | 160   | 5.309 | 0.3286 | 0.0094 | 0.0453  | 0.0012  | 0.51673 | 289.0  | 7.3  | 285.5 | 7.2  | 333  | 32 | 285.5 | 7.2  | 1.2  | Single Age |
| 09SFB13-29 | 218   | 2.23  | 0.3298 | 0.0094 | 0.0452  | 0.0011  | 0.49995 | 289.8  | 7.0  | 285.2 | 6.6  | 347  | 34 | 285.2 | 6.6  | 1.6  | Single Age |
| 09SFB13-30 | 477   | 2.09  | 0.325  | 0.0072 | 0.0452  | 0.0011  | 0.64761 | 285.5  | 5.5  | 285.1 | 6.9  | 313  | 25 | 285.1 | 6.9  | 0.1  | Single Age |
| 09SFB13-31 | 1737  | 3.96  | 0.407  | 0.012  | 0.053   | 0.0018  | 0.82329 | 346.2  | 8.8  | 334.0 | 11.0 | 436  | 24 | 334.0 | 11.0 | 3.5  | Single Age |
| 09SFB13-32 | 858   | 2.172 | 0.3197 | 0.0064 | 0.0444  | 0.0011  | 0.74698 | 281.5  | 4.9  | 280.6 | 6.6  | 306  | 16 | 280.6 | 6.6  | 0.3  | Single Age |
| 09SFB13-33 | 121   | 3.63  | 0.3131 | 0.0098 | 0.0435  | 0.0011  | 0.50633 | 276.0  | 7.5  | 274.4 | 7.1  | 294  | 34 | 274.4 | 7.1  | 0.6  | Single Age |
| 09SFB13-34 | 577   | 2.978 | 0.3339 | 0.0076 | 0.046   | 0.001   | 0.72955 | 292.2  | 5.8  | 289.8 | 6.2  | 292  | 18 | 289.8 | 6.2  | 0.8  | Single Age |
| 09SFB13-35 | 32.8  | 5.26  | 0.329  | 0.02   | 0.0441  | 0.0012  | 0.36373 | 288.0  | 16.0 | 277.8 | 7.5  | 478  | 54 | 277.8 | 7.5  | 3.5  | Single Age |
| 09SFB13-36 | 153.3 | 1.881 | 0.325  | 0.01   | 0.0444  | 0.0011  | 0.45463 | 285.8  | 8.1  | 280.0 | 7.0  | 325  | 35 | 280.0 | 7.0  | 2.0  | Single Age |
| 09SFB13-37 | 105.2 | 1.957 | 0.317  | 0.0096 | 0.0448  | 0.0011  | 0.39505 | 280.9  | 7.4  | 282.5 | 6.5  | 293  | 32 | 282.5 | 6.5  | -0.6 | Single Age |
| 09SFB13-38 | 623   | 3.91  | 0.3218 | 0.0076 | 0.0445  | 0.001   | 0.80558 | 283.0  | 5.8  | 280.3 | 6.2  | 309  | 17 | 280.3 | 6.2  | 1.0  | Single Age |
| 09SFB13-39 | 611   | 1.789 | 0.3292 | 0.0076 | 0.0457  | 0.0012  | 0.8237  | 288.6  | 5.8  | 287.9 | 7.3  | 304  | 17 | 287.9 | 7.3  | 0.2  | Single Age |
| 09SFB13-40 | 347.7 | 3.89  | 0.3221 | 0.0074 | 0.0455  | 0.0012  | 0.71674 | 283.2  | 5.7  | 287.0 | 7.6  | 278  | 25 | 287.0 | 7.6  | -1.3 | Single Age |
| 09SFB13-41 | 644   | 2.653 | 0.3476 | 0.0089 | 0.048   | 0.001   | 0.79302 | 302.5  | 6.7  | 301.9 | 6.2  | 305  | 16 | 301.9 | 6.2  | 0.2  | Single Age |
| 09SFB13-42 | 118.4 | 1.38  | 0.322  | 0.01   | 0.0454  | 0.0011  | 0.46126 | 283.6  | 7.8  | 285.8 | 6.7  | 300  | 33 | 285.8 | 6.7  | -0.8 | Single Age |
| 09SFB13-43 | 315   | 2.579 | 0.3312 | 0.0087 | 0.0468  | 0.0013  | 0.69989 | 290.1  | 6.6  | 294.6 | 7.9  | 252  | 22 | 294.6 | 7.9  | -1.6 | Single Age |
| 09SFB13-44 | 389   | 3.593 | 0.3327 | 0.0078 | 0.046   | 0.0011  | 0.74363 | 291.3  | 5.9  | 290.5 | 6.7  | 292  | 13 | 290.5 | 6.7  | 0.3  | Single Age |
| 09SFB13-45 | 1190  | 3.08  | 0.3448 | 0.0072 | 0.0472  | 0.0012  | 0.804   | 300.5  | 5.4  | 297.2 | 7.3  | 319  | 19 | 297.2 | 7.3  | 1.1  | Single Age |
| 09SFB13-46 | 212   | 1.995 | 0.3107 | 0.0078 | 0.0441  | 0.0011  | 0.66065 | 275.1  | 5.9  | 278.2 | 6.9  | 238  | 21 | 278.2 | 6.9  | -1.1 | Single Age |
| 09SFB13-47 | 652   | 1.872 | 0.3358 | 0.0066 | 0.0467  | 0.0011  | 0.717   | 293.8  | 5.0  | 293.9 | 6.5  | 299  | 23 | 293.9 | 6.5  | 0.0  | Single Age |
| 09SFB13-48 | 288.9 | 2.133 | 0.327  | 0.0084 | 0.0451  | 0.0011  | 0.69584 | 287.7  | 6.5  | 284.1 | 6.7  | 304  | 27 | 284.1 | 6.7  | 1.3  | Single Age |
| 09SFB13-49 | 191   | 2.243 | 0.869  | 0.021  | 0.1026  | 0.0026  | 0.82139 | 634.0  | 11.0 | 629.0 | 15.0 | 641  | 20 | 629.0 | 15.0 | 0.8  | Single Age |
| 09SFB13-50 | 516   | 2.665 | 0.3268 | 0.0089 | 0.0461  | 0.0013  | 0.71175 | 286.7  | 6.8  | 290.2 | 7.7  | 287  | 26 | 290.2 | 7.7  | -1.2 | Single Age |
| 09SFB13-51 | 200.3 | 2.156 | 0.3263 | 0.0084 | 0.0452  | 0.0012  | 0.71317 | 286.3  | 6.5  | 285.0 | 7.2  | 320  | 26 | 285.0 | 7.2  | 0.5  | Single Age |
| 09SFB13-52 | 177.4 | 1.639 | 0.3198 | 0.0088 | 0.0446  | 0.0012  | 0.57439 | 282.3  | 7.0  | 281.2 | 7.3  | 303  | 29 | 281.2 | 7.3  | 0.4  | Single Age |
| 09SFB13-53 | 224   | 5     | 0.556  | 0.013  | 0.0727  | 0.0016  | 0.64704 | 448.4  | 8.3  | 452.5 | 9.8  | 424  | 21 | 452.5 | 9.8  | -0.9 | Single Age |
| 09SFB13-54 | 362   | 8.02  | 0.595  | 0.017  | 0.0761  | 0.0019  | 0.59695 | 473.0  | 11.0 | 473.0 | 12.0 | 484  | 23 | 473.0 | 12.0 | 0.0  | Single Age |
| 09SFB13-55 | 451.7 | 2.277 | 0.3382 | 0.0089 | 0.0461  | 0.001   | 0.61587 | 295.4  | 6.7  | 290.4 | 6.3  | 343  | 24 | 290.4 | 6.3  | 1.7  | Single Age |
| 09SFB13-56 | 968   | 5.798 | 0.3502 | 0.0073 | 0.0479  | 0.0012  | 0.83449 | 304.6  | 5.5  | 301.3 | 7.4  | 323  | 16 | 301.3 | 7.4  | 1.1  | Single Age |
| 09SFB13-57 | 296   | 1.533 | 1.043  | 0.03   | 0.1179  | 0.0032  | 0.8613  | 724.0  | 15.0 | 718.0 | 19.0 | 738  | 16 | 718.0 | 19.0 | 0.8  | Single Age |
| 09SFB13-58 | 858   | 2.42  | 0.3214 | 0.0073 | 0.0438  | 0.0011  | 0.67074 | 282.7  | 5.6  | 276.1 | 7.0  | 355  | 17 | 276.1 | 7.0  | 2.3  | Single Age |
| 09SFB13-59 | 486   | 3.45  | 0.333  | 0.011  | 0.0463  | 0.0018  | 0.61228 | 291.6  | 8.7  | 292.0 | 11.0 | 287  | 42 | 292.0 | 11.0 | -0.1 | Single Age |
| 09SFB13-60 | 153   | 3.178 | 0.3397 | 0.0098 | 0.0467  | 0.0013  | 0.52221 | 296.5  | 7.4  | 294.4 | 8.0  | 337  | 34 | 294.4 | 8.0  | 0.7  | Single Age |
| 09SFB13-61 | 1477  | 3.35  | 0.335  | 0.0074 | 0.0458  | 0.0012  | 0.73721 | 293.1  | 5.6  | 288.4 | 7.1  | 335  | 16 | 288.4 | 7.1  | 1.3  | Single Age |
| 09SFB13-62 | 1500  | 4.413 | 0.3496 | 0.0075 | 0.0479  | 0.0012  | 0.61231 | 305.6  | 5.6  | 301.5 | 7.1  | 351  | 17 | 301.5 | 7.1  | 1.3  | Single Age |
| 09SFB13-63 | 350   | 3.99  | 0.3448 | 0.0096 | 0.0467  | 0.0012  | 0.62968 | 301.3  | 7.4  | 300.4 | 7.6  | 309  | 24 | 300.4 | 7.6  | 0.3  | Single Age |
| 09SFB13-64 | 771   | 17.83 | 0.3285 | 0.0079 | 0.0476  | 0.0012  | 0.75425 | 288.9  | 6.0  | 293.8 | 7.3  | 264  | 20 | 293.8 | 7.3  | -1.6 | Single Age |
| 09SFB13-65 | 416   | 1.026 | 0.3324 | 0.009  | 0.0446  | 0.0011  | 0.59681 | 291.0  | 6.8  | 281.0 | 6.7  | 374  | 31 | 281.0 | 6.7  | 3.4  | Single Age |
| 09SFB13-66 | 883   | 2.23  | 0.3405 | 0.0086 | 0.0463  | 0.0012  | 0.7837  | 297.2  | 6.5  | 291.5 | 7.5  | 361  | 20 | 291.5 | 7.5  | 1.9  | Single Age |
| 09SFB13-67 | 542   | 2.787 | 0.404  | 0.016  | 0.0442  | 0.0015  | 0.34199 | 344.0  | 11.0 | 280.3 | 9.6  | 853  | 80 | DISC  | DISC | 18.5 | Single Age |
| 09SFB13-68 | 724   | 2.79  | 0.2682 | 0.007  | 0.0398  | 0.0012  | 0.73412 | 241.1  | 5.6  | 251.6 | 7.7  | 273  | 25 | 251.6 | 7.7  | -4.4 | Single Age |
| 09SFB13-69 | 634   | 3.234 | 0.3383 | 0.0072 | 0.0464  | 0.0011  | 0.60628 | 295.6  | 5.5  | 292.4 | 7.1  | 327  | 20 | 292.4 | 7.1  | 1.1  | Single Age |
| 09SFB13-70 | 1470  | 25.54 | 0.555  | 0.018  | 0.0717  | 0.0027  | 0.85071 | 448.0  | 11.0 | 446.0 | 16.0 | 452  | 22 | 446.0 | 16.0 | 0.4  | Single Age |
| 09SFB13-71 | 501   | 3.449 | 0.3447 | 0.0076 | 0.0474  | 0.0011  | 0.7255  | 301.1  | 5.8  | 298.4 | 6.8  | 341  | 19 | 298.4 | 6.8  | 0.9  | Single Age |
| 09SFB13-72 | 513   | 1.921 | 0.3507 | 0.0091 | 0.0481  | 0.0012  | 0.67519 | 304.9  | 6.8  | 303.0 | 7.4  | 329  | 26 | 303.0 | 7.4  | 0.6  | Single Age |
| 09SFB13-73 | 268.1 | 4.57  | 0.335  | 0.008  | 0.0469  | 0.0012  | 0.65825 | 293.1  | 6.1  | 295.4 | 7.4  | 308  | 26 | 295.4 | 7.4  | -0.8 | Single Age |
| 09SFB13-74 | 517   | 3.37  | 0.3435 | 0.0088 | 0.0487  | 0.0012  | 0.75063 | 299.4  | 6.7  | 306.4 | 7.3  | 257  | 17 | 306.4 | 7.3  | -2.3 | Single Age |
| 09SFB13-75 | 145.9 | 1.59  | 0.584  | 0.017  | 0.0735  | 0.002   | 0.59361 | 466.0  | 11.0 | 458.0 | 12.0 | 470  | 28 | 458.0 | 12.0 | 1.7  | Single Age |
| 09SFB13-76 | 539   | 1.316 | 0.3388 | 0.0088 | 0.0455  | 0.0012  | 0.71262 | 297.4  | 6.9  | 286.8 | 7.5  | 359  | 24 | 286.8 | 7.5  | 3.6  | Single Age |
| 09SFB13-77 | 93.1  | 2.262 | 0.327  | 0.013  | 0.0446  | 0.0012  | 0.55126 | 286.0  | 10.0 | 281.2 | 7.7  | 359  | 40 | 281.2 | 7.7  | 1.7  | Single Age |
| 09SFB13-78 | 165.2 | 3.451 | 0.58   | 0.017  | 0.0738  | 0.002   | 0.73224 | 465.0  | 11.0 | 459.0 | 12.0 | 477  | 20 | 459.0 | 12.0 | 1.3  | Single Age |
| 09SFB13-79 | 243   | 2.215 | 0.3244 | 0.0092 | 0.04487 | 0.00099 | 0.69059 | 284.8  | 7.1  | 282.9 | 6.1  | 283  | 23 | 282.9 | 6.1  | 0.7  | Single Age |
| 09SFB13-80 | 211   | 1.41  | 0.907  | 0.023  | 0.1069  | 0.0027  | 0.77471 | 656.0  | 13.0 | 655.0 | 16.0 | 664  | 16 | 655.0 | 16.0 | 0.2  | Single Age |
| 09SFB13-81 | 422   | 3.297 | 0.337  | 0.0083 | 0.0469  | 0.0012  | 0.66835 | 294.5  | 6.3  | 295.3 | 7.4  | 324  | 18 | 295.3 | 7.4  | -0.3 | Single Age |
| 09SFB13-82 | 728   | 2.08  | 0.3315 | 0.007  | 0.0452  | 0.0012  | 0.74577 | 290.4  | 5.3  | 284.7 | 7.1  | 350  | 19 | 284.7 | 7.1  | 2.0  | Single Age |
| 09SFB13-83 | 469   | 3.382 | 0.3433 | 0.009  | 0.0483  | 0.0013  | 0.72523 | 300.1  | 6.7  | 303.7 | 8.2  | 290  | 24 | 303.7 | 8.2  | -1.2 | Single Age |
| 09SFB13-84 | 189.6 | 2.935 | 0.906  | 0.022  | 0.1055  | 0.003   | 0.76254 | 654.0  | 12.0 | 646.0 | 17.0 | 683  | 20 | 646.0 | 17.0 | 1.2  | Single Age |
| 09SFB13-85 | 174.8 | 0.583 | 0.304  | 0.011  | 0.0422  | 0.001   | 0.56765 | 268.7  | 8.4  | 266.2 | 6.3  | 273  | 27 | 266.2 | 6.3  | 0.9  | Single Age |
| 09SFB13-86 | 87.1  | 2.87  | 0.336  | 0.011  | 0.0465  | 0.0013  | 0.48523 | 293.3  | 8.7  | 292.8 | 8.3  | 343  | 42 | 292.8 | 8.3  | 0.2  | Single Age |
| 09SFB13-87 | 270.3 | 1.848 | 0.327  | 0.013  | 0.045   | 0.0014  | 0.53775 | 286.6  | 9.7  | 283.4 | 8.6  | 286  | 42 | 283.4 | 8.6  | 1.1  | Single Age |
| 09SFB13-88 | 390   | 3.552 | 0.795  | 0.019  | 0.0961  | 0.0028  | 0.83348 | 593.0  | 10.0 | 591.0 | 16.0 | 608  | 14 | 591.0 | 16.0 | 0.3  | Single Age |
| 09SFB13-89 | 345   | 3.217 | 0.3334 | 0.0093 | 0.0467  | 0.0012  | 0.68385 | 291.7  | 7.0  | 294.4 | 7.4  | 300  | 22 | 294.4 | 7.4  | -0.9 | Single Age |
| 09SFB13-90 | 516   | 2.828 | 0.3363 | 0.0083 | 0.0456  | 0.0012  | 0.63916 | 294.1  | 6.3  | 287.1 | 7.6  | 369  | 29 | 287.1 | 7.6  | 2.4  | Single Age |
| 09SFB13-91 | 148   | 3.2   | 0.346  | 0.014  | 0.0486  | 0.0014  | 0.59497 | 301.0  | 11.0 | 306.0 | 8.9  | 323  | 38 | 306.0 | 8.9  | -1.7 | Single Age |
| 09SFB13-92 | 120.7 | 3.273 | 0.321  | 0.01   | 0.0455  | 0.0014  | 0.4961  | 282.4  | 7.7  | 287.6 | 8.5  | 246  | 25 | 287.6 | 8.5  | -1.8 | Single Age |
| 09SFB13-93 | 262.5 | 1.99  | 0.3315 | 0.0091 | 0.0452  | 0.0011  | 0.63632 | 291.1  | 6.8  | 284.9 | 6.7  | 310  | 24 | 284.9 | 6.7  | 2.1  | Single Age |
| 09SFB13-94 | 415   | 1.77  | 0.3456 | 0.0083 | 0.0473  | 0.0014  | 0.71052 | 301.1  | 6.3  | 297.6 | 8.5  | 352  | 25 | 297.6 | 8.5  | 1.2  | Single Age |
| 09SFB13-95 | 1012  | 2.182 | 0.3273 | 0.0072 | 0.0449  | 0.001   | 0.77983 | 287.2  | 5.5  | 283.2 | 6.4  | 323  | 19 | 283.2 | 6.4  | 1.4  | Single Age |
| 09SFB13-96 | 22.9  | 2.977 | 3.89   | 0.12   | 0.0726  | 0.0021  | 0.59876 | 1613.0 | 25.0 | 451.0 | 13.0 | 3861 | 25 | DISC  | DISC | 72.0 | Single Age |
| 09SFB13-97 | 255   | 2.249 | 0.58   | 0.017  | 0.0755  | 0.0021  | 0.70933 | 465.0  | 11.0 | 469.0 | 12.0 | 464  | 21 | 469.0 | 12.0 | -0.9 | Single Age |
| 09S        |       |       |        |        |         |         |         |        |      |       |      |      |    |       |      |      |            |

|                                            |         |        |                 |          |         |          |          |                    |          |       |          |        |          |          |          |              |              |
|--------------------------------------------|---------|--------|-----------------|----------|---------|----------|----------|--------------------|----------|-------|----------|--------|----------|----------|----------|--------------|--------------|
| 09SFB13-139                                | 561     | 3.69   | 0.3372          | 0.0076   | 0.0471  | 0.0012   | 0.83316  | 295.5              | 5.7      | 296.5 | 7.5      | 315    | 17       | 296.5    | 7.5      | -0.3         | Single Age   |
| 09SFB13-140                                | 579     | 3.327  | 0.3395          | 0.0077   | 0.0459  | 0.0011   | 0.70136  | 296.5              | 5.9      | 289.5 | 6.9      | 351    | 19       | 289.5    | 6.9      | 2.4          | Single Age   |
| Sample Name: 09-SFB-21                     |         |        | Isotopic Ratios |          |         |          |          | Apparent Ages (Ma) |          |       |          |        |          |          |          |              |              |
| Lower Freshwater Molasse Ila (22.5 ± 1 Ma) |         |        | 207Pb           | 2σ error | 206Pb   | 2σ error | Error    | 207Pb              | 2σ error | 206Pb | 2σ error | 207Pb  | 2σ error | Best age | 2σ error | Discordance* | Rim, Core or |
| Grain #                                    | U (ppm) | U/Th   | 235U            | (abs.)   | 238U    | (abs.)   | Corr.    | 235U               | (Ma)     | 238U  | (Ma)     | 206Pb  | (Ma)     | (Ma)     | (Ma)     | %            | Single Age   |
| SFB21_01                                   | 608     | 2.43   | 0.3558          | 0.0037   | 0.04896 | 0.00037  | 0.4273   | 309                | 2.7      | 308.1 | 2.3      | 326    | 12       | 308.1    | 2.3      | 0.3          | Single Age   |
| SFB21_03                                   | 1333    | 15.71  | 0.5608          | 0.0061   | 0.07198 | 0.00071  | 0.73673  | 451.9              | 3.9      | 448.1 | 4.3      | 483    | 10       | 448.1    | 4.3      | 0.8          | Single Age   |
| SFB21_04                                   | 159.9   | 1.947  | 1.015           | 0.015    | 0.115   | 0.0014   | 0.81716  | 710.7              | 7.7      | 701.9 | 8        | 755    | 13       | 701.9    | 8.0      | 1.2          | Single Age   |
| SFB21_05                                   | 1555    | 43.9   | 0.8597          | 0.0051   | 0.10201 | 0.00062  | 0.60619  | 629.9              | 2.8      | 626.2 | 3.6      | 645.4  | 7.9      | 626.2    | 3.6      | 0.6          | Single Age   |
| SFB21_06                                   | 401     | 1.49   | 0.3334          | 0.0088   | 0.04613 | 0.0009   | 0.46859  | 292.1              | 6.7      | 290.7 | 5.6      | 305    | 30       | 290.7    | 5.6      | 0.5          | Single Age   |
| SFB21_07                                   | 358     | 3.24   | 0.7045          | 0.0083   | 0.08866 | 0.00081  | 0.53227  | 541.3              | 5        | 547.6 | 4.8      | 520    | 12       | 547.6    | 4.8      | -1.2         | Single Age   |
| SFB21_08                                   | 634     | 1.717  | 0.8227          | 0.0093   | 0.09812 | 0.00096  | 0.50725  | 609.4              | 5.2      | 603.3 | 5.7      | 650    | 11       | 603.3    | 5.7      | 1.0          | Single Age   |
| SFB21_09                                   | 173.5   | 1.314  | 0.3198          | 0.007    | 0.04425 | 0.00066  | 0.16161  | 281.7              | 5.4      | 279.1 | 4        | 294    | 28       | 279.1    | 4.0      | 0.9          | Single Age   |
| SFB21_10                                   | 314     | 4.43   | 0.5906          | 0.0069   | 0.07495 | 0.00068  | 0.46141  | 471.7              | 4.3      | 465.9 | 4.1      | 515    | 15       | 465.9    | 4.1      | 1.2          | Single Age   |
| SFB21_11                                   | 104     | 1.564  | 0.531           | 0.013    | 0.04119 | 0.00065  | 0.027195 | 431.8              | 8.5      | 260.2 | 4        | 1524   | 36       | DISC     | DISC     | 39.7         | Single Age   |
| SFB21_12                                   | 449     | 10.01  | 0.5498          | 0.0069   | 0.07197 | 0.00072  | 0.11232  | 444.7              | 4.5      | 448   | 4.4      | 433    | 17       | 448.0    | 4.4      | -0.7         | Single Age   |
| SFB21_13                                   | 1018    | 1.677  | 0.394           | 0.012    | 0.04716 | 0.00079  | 0.70271  | 337                | 8.9      | 297.1 | 4.8      | 625    | 34       | DISC     | DISC     | 11.8         | Single Age   |
| SFB21_14                                   | 409     | 6.73   | 0.802           | 0.022    | 0.0929  | 0.0015   | 0.89097  | 597                | 12       | 572.4 | 8.9      | 709    | 31       | 572.4    | 8.9      | 4.1          | Single Age   |
| SFB21_16                                   | 361     | 1.354  | 1.132           | 0.012    | 0.12695 | 0.00096  | 0.58559  | 768.5              | 5.6      | 770.4 | 5.5      | 773    | 12       | 770.4    | 5.5      | -0.2         | Single Age   |
| SFB21_17                                   | 1501    | 4.46   | 0.541           | 0.012    | 0.0687  | 0.0013   | 0.87861  | 438.9              | 8.3      | 428.1 | 8        | 503    | 14       | 428.1    | 8.0      | 2.5          | Single Age   |
| SFB21_18                                   | 309.1   | 3.414  | 0.3513          | 0.0052   | 0.04825 | 0.00038  | 0.091021 | 305.6              | 3.9      | 303.8 | 2.3      | 348    | 22       | 303.8    | 2.3      | 0.6          | Single Age   |
| SFB21_19                                   | 856     | 0.969  | 1.042           | 0.067    | 0.0577  | 0.0013   | -0.62247 | 716                | 33       | 361.3 | 7.9      | 2090   | 160      | DISC     | DISC     | 49.5         | Single Age   |
| SFB21_20                                   | 1990    | 16.65  | 0.5328          | 0.004    | 0.06435 | 0.00065  | 0.61957  | 433.7              | 2.7      | 402   | 4        | 608    | 12       | 402.0    | 4.0      | 7.3          | Single Age   |
| SFB21_21                                   | 500     | 3.15   | 0.3298          | 0.0035   | 0.04532 | 0.00049  | 0.55138  | 289.4              | 2.7      | 285.7 | 3        | 313    | 13       | 285.7    | 3.0      | 1.3          | Single Age   |
| SFB21_22                                   | 1545    | 1.251  | 0.5392          | 0.0076   | 0.06193 | 0.00054  | 0.35649  | 437.5              | 5        | 387.4 | 3.3      | 718    | 27       | DISC     | DISC     | 11.5         | Single Age   |
| SFB21_23                                   | 74.4    | 0.46   | 0.635           | 0.06     | 0.04967 | 0.00098  | 0.65327  | 491                | 38       | 312.5 | 6        | 1380   | 180      | DISC     | DISC     | 36.4         | Single Age   |
| SFB21_24                                   | 554     | 1.96   | 0.3608          | 0.0048   | 0.04851 | 0.0005   | 0.38062  | 312.7              | 3.5      | 305.4 | 3.1      | 362    | 22       | 305.4    | 3.1      | 2.3          | Single Age   |
| SFB21_25                                   | 914     | 2.01   | 0.3517          | 0.0034   | 0.04813 | 0.00034  | 0.14166  | 306                | 2.5      | 303   | 2.1      | 327.7  | 9.1      | 303.0    | 2.1      | 1.0          | Single Age   |
| SFB21_26                                   | 919     | 5.73   | 0.5873          | 0.0047   | 0.07533 | 0.00052  | 0.546    | 469.1              | 3        | 468.2 | 3.1      | 482    | 8.1      | 468.2    | 3.1      | 0.2          | Single Age   |
| SFB21_27                                   | 383     | 0.816  | 0.5932          | 0.0065   | 0.07502 | 0.00059  | 0.6293   | 472.7              | 4.2      | 466.3 | 3.5      | 495.4  | 9        | 466.3    | 3.5      | 1.4          | Single Age   |
| SFB21_28                                   | 610     | 1.714  | 0.565           | 0.0071   | 0.0714  | 0.001    | 0.86766  | 454.6              | 4.6      | 444.5 | 6.3      | 504.9  | 8.6      | 444.5    | 6.3      | 2.2          | Single Age   |
| SFB21_29                                   | 915     | 2.831  | 0.3389          | 0.0037   | 0.04664 | 0.00045  | 0.84711  | 296.3              | 2.8      | 293.8 | 2.8      | 315.2  | 8        | 293.8    | 2.8      | 0.8          | Single Age   |
| SFB21_30                                   | 620     | 7.7    | 0.593           | 0.022    | 0.0895  | 0.0022   | 0.95566  | 533                | 12       | 546   | 13       | 488.3  | 9.8      | 546.0    | 13.0     | -2.4         | Single Age   |
| SFB21_31                                   | 1094    | 6.7    | 0.5843          | 0.0073   | 0.07204 | 0.00092  | 0.76436  | 467.8              | 4.6      | 448.4 | 5.5      | 566    | 12       | 448.4    | 5.5      | 4.1          | Single Age   |
| SFB21_32                                   | 694     | 3.38   | 0.6064          | 0.0064   | 0.07771 | 0.00069  | 0.90586  | 481.1              | 4.1      | 482.4 | 4.1      | 481.6  | 9.4      | 482.4    | 4.1      | -0.3         | Single Age   |
| SFB21_33                                   | 324     | 1.71   | 0.649           | 0.014    | 0.079   | 0.0018   | 0.82588  | 506.9              | 8.7      | 490   | 11       | 589    | 19       | 490.0    | 11.0     | 3.3          | Single Age   |
| SFB21_34                                   | 349     | 3.825  | 0.998           | 0.03     | 0.1133  | 0.0026   | 0.95269  | 703                | 15       | 692   | 15       | 737    | 16       | 692.0    | 15.0     | 1.6          | Single Age   |
| SFB21_35                                   | 149     | 1.983  | 0.3392          | 0.0053   | 0.04687 | 0.00049  | 0.19905  | 296.4              | 4.1      | 295.3 | 3        | 328    | 26       | 295.3    | 3.0      | 0.4          | Single Age   |
| SFB21_36                                   | 215     | 4.17   | 0.591           | 0.0097   | 0.07577 | 0.00061  | 0.35582  | 471.2              | 6.2      | 470.8 | 3.6      | 474    | 21       | 470.8    | 3.6      | 0.1          | Single Age   |
| SFB21_37                                   | 250     | 2.63   | 0.6489          | 0.0067   | 0.08237 | 0.00067  | 0.20586  | 508.1              | 4.1      | 510.2 | 4        | 504    | 13       | 510.2    | 4.0      | -0.4         | Single Age   |
| SFB21_38                                   | 405     | 2.84   | 0.5871          | 0.0058   | 0.07587 | 0.00051  | 0.25004  | 468.9              | 3.7      | 471.4 | 3        | 465    | 12       | 471.4    | 3.0      | -0.5         | Single Age   |
| SFB21_39                                   | 870     | 2.137  | 0.3598          | 0.0032   | 0.04984 | 0.00039  | 0.47772  | 312                | 24       | 313.5 | 2.4      | 300    | 12       | 313.5    | 2.4      | -0.5         | Single Age   |
| SFB21_40                                   | 852     | 1.92   | 4.65            | 0.14     | 0.2691  | 0.0059   | 0.95684  | 1761               | 24       | 1535  | 30       | 2031   | 22       | DISC     | DISC     | 24.4         | Single Age   |
| SFB21_41                                   | 202     | 4.49   | 0.5879          | 0.0064   | 0.07526 | 0.00057  | 0.1446   | 469.4              | 4.1      | 467.8 | 3.4      | 488    | 16       | 467.8    | 3.4      | 0.3          | Single Age   |
| SFB21_42                                   | 102.9   | 0.838  | 0.583           | 0.013    | 0.0715  | 0.0012   | 0.12103  | 466                | 8.5      | 445.2 | 6.9      | 591    | 34       | 445.2    | 6.9      | 4.5          | Single Age   |
| SFB21_43                                   | 808     | 1.223  | 0.8211          | 0.0059   | 0.09821 | 0.00078  | 0.74067  | 609.1              | 3.2      | 603.9 | 4.6      | 618.8  | 8.7      | 603.9    | 4.6      | 0.9          | Single Age   |
| SFB21_44                                   | 218     | 1.766  | 0.3164          | 0.0061   | 0.04358 | 0.0006   | 0.38309  | 278.9              | 4.7      | 274.9 | 3.7      | 303    | 25       | 274.9    | 3.7      | 1.4          | Single Age   |
| SFB21_45                                   | 181.3   | 5.22   | 0.6831          | 0.0098   | 0.0845  | 0.001    | 0.51703  | 528.3              | 5.9      | 522.7 | 6.1      | 547    | 15       | 522.7    | 6.1      | 1.1          | Single Age   |
| SFB21_46                                   | 192     | 18.1   | 0.695           | 0.017    | 0.0861  | 0.0016   | 0.73193  | 535                | 10       | 532   | 9.2      | 539    | 21       | 532.0    | 9.2      | 0.6          | Single Age   |
| SFB21_47                                   | 25.14   | 0.411  | 3.367           | 0.043    | 0.2602  | 0.0032   | 0.33596  | 1497               | 10       | 1490  | 16       | 1493   | 17       | 1493.0   | 17.0     | 0.2          | Single Age   |
| SFB21_48                                   | 226.8   | 1.616  | 0.2259          | 0.0022   | 0.03018 | 0.00029  | 0.77802  | 206.8              | 1.8      | 191.7 | 1.8      | 383.3  | 9.1      | 191.7    | 1.8      | 7.3          | Single Age   |
| SFB21_49                                   | 349     | 4.16   | 1.85            | 0.14     | 0.123   | 0.0056   | 0.8629   | 1060               | 49       | 747   | 32       | 1774   | 56       | DISC     | DISC     | 29.5         | Single Age   |
| SFB21_50                                   | 804     | 9.11   | 0.71            | 0.027    | 0.0834  | 0.0037   | 0.84717  | 544                | 16       | 516   | 22       | 683    | 32       | 516.0    | 22.0     | 5.1          | Single Age   |
| SFB21_51                                   | 366     | 2.94   | 0.742           | 0.013    | 0.0896  | 0.0017   | 0.88677  | 562.9              | 7.8      | 553   | 9.9      | 610    | 11       | 553.0    | 9.9      | 1.8          | Single Age   |
| SFB21_52                                   | 470     | 2.076  | 0.6289          | 0.0067   | 0.07881 | 0.00053  | 0.29231  | 495.3              | 4.2      | 489   | 3.2      | 532    | 16       | 489.0    | 3.2      | 1.3          | Single Age   |
| SFB21_53                                   | 396     | 8.09   | 0.5528          | 0.006    | 0.07106 | 0.00055  | 0.62153  | 446.7              | 3.9      | 442.5 | 3.3      | 460.7  | 9.8      | 442.5    | 3.3      | 0.9          | Single Age   |
| SFB21_54                                   | 408     | 1.586  | 0.746           | 0.013    | 0.0898  | 0.0012   | 0.48487  | 565.8              | 7.8      | 554.4 | 7.4      | 622    | 14       | 554.4    | 7.4      | 2.0          | Single Age   |
| SFB21_55                                   | 196.7   | 5.04   | 3.73            | 0.24     | 0.1906  | 0.0095   | 0.95955  | 1568               | 54       | 1140  | 49       | 2178   | 49       | DISC     | DISC     | 47.7         | Single Age   |
| SFB21_56                                   | 171.5   | 0.2736 | 6.015           | 0.038    | 0.3567  | 0.0023   | 0.54067  | 1978               | 5.5      | 1966  | 11       | 1987.6 | 5.9      | 1987.6   | 5.9      | 1.1          | Single Age   |
| SFB21_57                                   | 373     | 1.598  | 0.933           | 0.081    | 0.0806  | 0.0025   | 0.95678  | 660                | 42       | 500   | 15       | 1210   | 110      | DISC     | DISC     | 24.2         | Single Age   |
| SFB21_58                                   | 1394    | 2.79   | 0.326           | 0.0038   | 0.03187 | 0.00086  | 0.20236  | 286.5              | 2.9      | 202.2 | 5.4      | 1079   | 60       | DISC     | DISC     | 29.4         | Single Age   |
| SFB21_59                                   | 168     | 1.9    | 0.3356          | 0.0054   | 0.04603 | 0.00043  | 0.15997  | 293.7              | 4.1      | 290.1 | 2.6      | 337    | 24       | 290.1    | 2.6      | 1.2          | Single Age   |
| SFB21_60                                   | 123     | 1.78   | 0.5914          | 0.0087   | 0.07496 | 0.0007   | 0.24979  | 471.5              | 5.5      | 465.9 | 4.2      | 495    | 19       | 465.9    | 4.2      | 1.2          | Single Age   |
| SFB21_61                                   | 211.9   | 1.931  | 0.3616          | 0.0065   | 0.04761 | 0.00048  | 0.14401  | 313.2              | 4.8      | 299.8 | 3        | 422    | 25       | 299.8    | 3.0      | 4.3          | Single Age   |
| SFB21_62                                   | 325     | 2.35   | 0.5722          | 0.0082   | 0.07279 | 0.00084  | 0.76503  | 459.3              | 5.3      | 452.9 | 5        | 491    | 17       | 452.9    | 5.0      | 1.4          | Single Age   |
| SFB21_63                                   | 236.8   | 0.953  | 0.851           | 0.018    | 0.0967  | 0.0017   | 0.58705  | 624.8              | 9.6      | 595   | 10       | 728    | 18       | 595.0    | 10.0     | 4.8          | Single Age   |
| SFB21_64                                   | 289     | 0.624  | 0.3872          | 0.0044   | 0.05284 | 0.00045  | 0.36376  | 332.2              | 3.2      | 332   | 2.8      | 330    | 12       | 332.0    | 2.8      | 0.1          | Single Age   |
| SFB21_65                                   | 353.3   | 0.522  | 0.5736          | 0.0071   | 0.07235 | 0.00073  | 0.59431  | 460.7              | 4.5      | 450.3 | 4.4      | 485    | 14       | 450.3    | 4.4      | 2.3          | Single Age   |
| SFB21_66                                   | 210     | 2.63   | 1.529           | 0.017    | 0.1567  | 0.0011   | 0.53578  | 942.5              | 6.9      | 938.2 | 6.3      | 952    | 11       | 952.0    | 11.0     | 1.4          | Single Age   |
| SFB21_67                                   | 74.9    | 22.3   | 0.965           | 0.023    | 0.1096  | 0.0012   | 0.038801 | 685                | 11       | 670.2 | 7        | 702    | 24       | 670.2    | 7.0      | 2.2          | Single Age   |
| SFB21_68                                   | 63.5    | 1.091  | 0.81            | 0.027    | 0.092   | 0.0012   | 0.052523 | 603                | 15       | 567.4 | 7        | 713    | 45       | 567.4    | 7.0      | 5.9          | Single Age   |
| SFB21_69                                   | 492     | 1.632  | 1.687           | 0.021    | 0.1658  | 0.0023   | 0.83057  | 1003               | 8        | 989   | 13       | 1043.1 | 8.3      | 1043.1   | 8.3      | 5.2          | Single Age   |
| SFB21_70                                   |         |        |                 |          |         |          |          |                    |          |       |          |        |          |          |          |              |              |

|                                        |       |        |                 |          |         |          |           |                    |          |        |          |        |          |          |          |              |              |
|----------------------------------------|-------|--------|-----------------|----------|---------|----------|-----------|--------------------|----------|--------|----------|--------|----------|----------|----------|--------------|--------------|
| SFB21_104                              | 237.4 | 2.649  | 0.6012          | 0.0093   | 0.07345 | 0.00079  | 0.06601   | 477.7              | 5.9      | 457.6  | 4.9      | 526    | 26       | 457.6    | 4.9      | 4.2          | Single Age   |
| SFB21_105                              | 426   | 1.523  | 0.6251          | 0.0047   | 0.07937 | 0.00048  | 0.26096   | 493.3              | 2.9      | 492.4  | 2.9      | 504    | 11       | 492.4    | 2.9      | 0.2          | Single Age   |
| SFB21_106                              | 582   | 1.184  | 0.623           | 0.015    | 0.0734  | 0.00072  | 0.6871    | 491.3              | 9.2      | 456.6  | 4.3      | 675    | 34       | 456.6    | 4.3      | 7.1          | Single Age   |
| SFB21_107                              | 32.9  | 0.919  | 0.808           | 0.028    | 0.0911  | 0.0014   | 0.1184    | 603                | 15       | 562.2  | 8.1      | 784    | 43       | 562.2    | 8.1      | 6.8          | Single Age   |
| SFB21_108                              | 597   | 3.67   | 0.6817          | 0.0097   | 0.07571 | 0.00065  | 0.5794    | 527.6              | 5.9      | 470.4  | 3.9      | 776    | 19       | DISC     | DISC     | 10.8         | Single Age   |
| SFB21_109                              | 577   | 7.79   | 0.5824          | 0.0056   | 0.07265 | 0.00055  | 0.60704   | 465.9              | 3.6      | 452.1  | 3.3      | 511    | 12       | 452.1    | 3.3      | 3.0          | Single Age   |
| SFB21_110                              | 471   | 3.44   | 0.5972          | 0.0067   | 0.07693 | 0.0008   | 0.52015   | 475.3              | 4.3      | 477.7  | 4.8      | 478    | 13       | 477.7    | 4.8      | -0.5         | Single Age   |
| SFB21_111                              | 884   | 1.251  | 0.5826          | 0.0063   | 0.07173 | 0.00068  | 0.61717   | 466.1              | 4.1      | 446.6  | 4.1      | 550    | 13       | 446.6    | 4.1      | 4.2          | Single Age   |
| SFB21_112                              | 327.2 | 5.74   | 0.6113          | 0.0099   | 0.07544 | 0.00099  | 0.14618   | 484.2              | 6.2      | 468.8  | 5.9      | 570    | 31       | 468.8    | 5.9      | 3.2          | Single Age   |
| SFB21_113                              | 246.5 | 5.69   | 0.95            | 0.013    | 0.1077  | 0.0012   | 0.37684   | 677.8              | 6.6      | 659.5  | 6.9      | 748    | 23       | 659.5    | 6.9      | 2.7          | Single Age   |
| SFB21_114                              | 1986  | 2.142  | 0.321           | 0.0029   | 0.04292 | 0.0004   | 0.39952   | 282.6              | 2.2      | 270.9  | 2.5      | 377    | 20       | 270.9    | 2.5      | 4.1          | Single Age   |
| SFB21_115                              | 987   | 1.65   | 0.393           | 0.008    | 0.04526 | 0.00063  | 0.53958   | 336.3              | 5.8      | 285.3  | 3.9      | 706    | 27       | DISC     | DISC     | 15.2         | Single Age   |
| SFB21_116                              | 619   | 1.132  | 0.5846          | 0.0049   | 0.07499 | 0.00067  | 0.57021   | 467.3              | 3.1      | 466.1  | 4        | 463    | 9.5      | 466.1    | 4.0      | 0.3          | Single Age   |
| SFB21_117                              | 233   | 10.1   | 0.585           | 0.013    | 0.07371 | 0.00097  | 0.41832   | 467.6              | 8.3      | 458.4  | 5.8      | 537    | 27       | 458.4    | 5.8      | 2.0          | Single Age   |
| SFB21_118                              | 448   | 1.481  | 0.588           | 0.006    | 0.07363 | 0.00045  | 0.29251   | 469.4              | 3.9      | 458    | 2.7      | 522    | 13       | 458.0    | 2.7      | 2.4          | Single Age   |
| SFB21_119                              | 333   | 14.5   | 0.61            | 0.014    | 0.0764  | 0.0018   | 0.62831   | 482.7              | 9        | 475    | 11       | 527    | 25       | 475.0    | 11.0     | 1.6          | Single Age   |
| SFB21_120                              | 358   | 9.41   | 0.5809          | 0.0055   | 0.07428 | 0.00055  | 0.48597   | 464.9              | 3.6      | 461.9  | 3.3      | 477    | 12       | 461.9    | 3.3      | 0.6          | Single Age   |
| Sample Name: 09-SFB-45                 |       |        |                 |          |         |          |           |                    |          |        |          |        |          |          |          |              |              |
| Lower Freshwater Molasse I (27 ± 1 Ma) |       |        | Isotopic Ratios |          |         |          |           | Apparent Ages (Ma) |          |        |          |        |          |          |          |              |              |
|                                        | U     | U/Th   | 207Pb           | 2σ error | 206Pb   | 2σ error | Error     | 207Pb              | 2σ error | 206Pb  | 2σ error | 207Pb  | 2σ error | Best age | 2σ error | Discordance* | Rim, Core or |
| Grain #                                | (ppm) |        | 235U            | (abs.)   | 238U    | (abs.)   | Corr.     | 235U               | (Ma)     | 238U   | (Ma)     | 206Pb  | (Ma)     | (Ma)     | (Ma)     | %            | Single Age   |
| SFB45_01                               | 171.8 | 1.36   | 1.467           | 0.025    | 0.1467  | 0.0021   | 0.83019   | 916                | 10       | 882    | 12       | 978    | 12       | 978.0    | 12.0     | 9.8          | Single Age   |
| SFB45_02                               | 243.9 | 1.495  | 0.3632          | 0.007    | 0.04945 | 0.00069  | 0.5627    | 315                | 5.1      | 311.1  | 4.3      | 326    | 21       | 311.1    | 4.3      | 1.2          | Single Age   |
| SFB45_03                               | 393   | 0.989  | 0.704           | 0.016    | 0.0728  | 0.0015   | 0.57099   | 540.3              | 8.8      | 452.7  | 9.2      | 931    | 43       | DISC     | DISC     | 16.2         | Single Age   |
| SFB45_04                               | 85.4  | 0.3849 | 0.858           | 0.031    | 0.0875  | 0.0015   | -0.52357  | 627                | 17       | 540.8  | 8.7      | 952    | 94       | DISC     | DISC     | 13.7         | Single Age   |
| SFB45_05                               | 587   | 22.5   | 0.3909          | 0.0052   | 0.05302 | 0.00075  | 0.57277   | 335                | 3.8      | 333    | 4.6      | 345    | 16       | 333.0    | 4.6      | 0.6          | Single Age   |
| SFB45_06                               | 365   | 1.867  | 0.652           | 0.01     | 0.0807  | 0.0016   | 0.69952   | 509.6              | 6.4      | 500.4  | 9.6      | 598    | 30       | 500.4    | 9.6      | 1.8          | Single Age   |
| SFB45_08                               | 578   | 30     | 0.7052          | 0.0061   | 0.08618 | 0.00082  | 0.58134   | 541.8              | 3.6      | 532.9  | 4.8      | 568    | 10       | 532.9    | 4.8      | 1.6          | Single Age   |
| SFB45_09                               | 203   | 0.895  | 0.3767          | 0.0066   | 0.05143 | 0.00048  | 0.34473   | 325                | 5        | 323.3  | 3        | 320    | 20       | 323.3    | 3.0      | 0.5          | Single Age   |
| SFB45_11                               | 74.2  | 0.511  | 1.727           | 0.027    | 0.1681  | 0.0015   | -0.006653 | 1018               | 9.9      | 1001.3 | 8.4      | 1051   | 24       | 1051.0   | 24.0     | 4.7          | Single Age   |
| SFB45_12                               | 939   | 36.7   | 0.4093          | 0.0091   | 0.05473 | 0.00087  | 0.82839   | 348.2              | 6.5      | 343.5  | 5.3      | 373    | 17       | 343.5    | 5.3      | 1.3          | Single Age   |
| SFB45_13                               | 429.2 | 0.97   | 0.8852          | 0.0061   | 0.10449 | 0.00074  | 0.47822   | 643.7              | 3.3      | 640.6  | 4.3      | 645    | 10       | 640.6    | 4.3      | 0.5          | Single Age   |
| SFB45_14                               | 78.7  | 0.729  | 13.784          | 0.091    | 0.5351  | 0.0042   | 0.5058    | 2735               | 6.2      | 2765   | 18       | 2708.4 | 6.6      | 2708.4   | 6.6      | -2.1         | Single Age   |
| SFB45_15                               | 224.9 | 1.031  | 0.6097          | 0.0088   | 0.0752  | 0.00074  | 0.28411   | 483.1              | 5.5      | 467.4  | 4.4      | 552    | 23       | 467.4    | 4.4      | 3.2          | Single Age   |
| SFB45_16                               | 180   | 1.616  | 2.368           | 0.045    | 0.2077  | 0.003    | 0.875     | 1232               | 13       | 1216   | 16       | 1243   | 13       | 1243.0   | 13.0     | 2.2          | Single Age   |
| SFB45_17                               | 327   | 2.31   | 0.4293          | 0.007    | 0.05422 | 0.0006   | 0.15926   | 362.5              | 5        | 340.4  | 3.7      | 495    | 34       | 340.4    | 3.7      | 6.1          | Single Age   |
| SFB45_18                               | 214   | 0.9342 | 2.208           | 0.017    | 0.2014  | 0.0012   | 0.51179   | 1183               | 5.3      | 1182.5 | 6.7      | 1182.7 | 7.8      | 1182.7   | 7.8      | 0.0          | Single Age   |
| SFB45_19                               | 31.7  | 0.587  | 1.63            | 0.035    | 0.1577  | 0.0018   | -0.12873  | 982                | 13       | 944    | 9.8      | 1074   | 31       | 1074.0   | 31.0     | 12.1         | Single Age   |
| SFB45_20                               | 322   | 1.71   | 0.6426          | 0.0088   | 0.08062 | 0.00067  | 0.46405   | 503.7              | 5.5      | 499.8  | 4        | 511    | 14       | 499.8    | 4.0      | 0.8          | Single Age   |
| SFB45_21                               | 136   | 0.518  | 5.707           | 0.084    | 0.3615  | 0.0054   | 0.89237   | 1931               | 13       | 1988   | 25       | 1863.7 | 7.6      | 1863.7   | 7.6      | -6.7         | Single Age   |
| SFB45_22                               | 272   | 0.497  | 0.8391          | 0.009    | 0.09944 | 0.00095  | -0.085796 | 618.4              | 5        | 611.1  | 5.6      | 633    | 12       | 611.1    | 5.6      | 1.2          | Single Age   |
| SFB45_23                               | 1027  | 0.0266 | 0.778           | 0.01     | 0.092   | 0.0015   | 0.9276    | 583.9              | 5.6      | 567.1  | 9.1      | 657    | 11       | 567.1    | 9.1      | 2.9          | Single Age   |
| SFB45_24                               | 310   | 1.572  | 0.796           | 0.015    | 0.0926  | 0.0011   | 0.21607   | 594.1              | 8.4      | 570.9  | 6.5      | 673    | 25       | 570.9    | 6.5      | 3.9          | Single Age   |
| SFB45_25                               | 480   | 1.495  | 0.8097          | 0.0071   | 0.09772 | 0.00064  | 0.47981   | 602.2              | 4        | 601    | 3.7      | 590.8  | 9.7      | 601.0    | 3.7      | 0.2          | Single Age   |
| SFB45_26                               | 331   | 1.61   | 2.089           | 0.022    | 0.1917  | 0.0023   | 0.83214   | 1145               | 7.2      | 1130   | 13       | 1163.9 | 8.5      | 1163.9   | 8.5      | 2.9          | Single Age   |
| SFB45_27                               | 132.6 | 0.711  | 0.937           | 0.014    | 0.1097  | 0.0017   | 0.63926   | 670.6              | 7.5      | 670.7  | 9.6      | 660    | 19       | 670.7    | 9.6      | 0.0          | Single Age   |
| SFB45_28                               | 173   | 1.398  | 1.209           | 0.018    | 0.1306  | 0.0012   | 0.37066   | 804.2              | 8.4      | 791    | 7        | 834    | 20       | 791.0    | 7.0      | 1.6          | Single Age   |
| SFB45_29                               | 155.5 | 2.34   | 3.468           | 0.024    | 0.2672  | 0.002    | 0.312     | 1520               | 5.4      | 1526   | 10       | 1500   | 11       | 1500.0   | 11.0     | -1.7         | Single Age   |
| SFB45_30                               | 130.3 | 1.086  | 0.888           | 0.017    | 0.1007  | 0.0021   | 0.71644   | 644.6              | 9.3      | 618    | 12       | 744    | 18       | 618.0    | 12.0     | 4.1          | Single Age   |
| SFB45_31                               | 181.7 | 1.84   | 7.124           | 0.048    | 0.3791  | 0.0024   | 0.66869   | 2127               | 6        | 2074   | 12       | 2179.7 | 5.8      | 2179.7   | 5.8      | 4.8          | Single Age   |
| SFB45_32                               | 199.4 | 4.5    | 0.731           | 0.022    | 0.0894  | 0.0018   | 0.088762  | 556                | 13       | 552    | 11       | 581    | 23       | 552.0    | 11.0     | 0.7          | Single Age   |
| SFB45_33                               | 157.5 | 0.659  | 0.2835          | 0.0057   | 0.03843 | 0.0004   | 0.17132   | 253.2              | 4.5      | 243.1  | 2.5      | 347    | 28       | 243.1    | 2.5      | 4.0          | Single Age   |
| SFB45_34                               | 215   | 0.7408 | 1.596           | 0.019    | 0.1558  | 0.0012   | 0.2563    | 968.2              | 7.3      | 933.4  | 6.5      | 1033   | 15       | 1033.0   | 15.0     | 9.6          | Single Age   |
| SFB45_35                               | 698   | 1.22   | 0.4174          | 0.0053   | 0.05451 | 0.00059  | 0.010393  | 354.1              | 3.8      | 342.1  | 3.6      | 437    | 28       | 342.1    | 3.6      | 3.4          | Single Age   |
| SFB45_36                               | 533   | 12.2   | 0.6945          | 0.0078   | 0.08607 | 0.00076  | 0.64481   | 536.1              | 4.8      | 532.3  | 4.5      | 545    | 10       | 532.3    | 4.5      | 0.7          | Single Age   |
| SFB45_37                               | 627   | 1.537  | 0.832           | 0.011    | 0.0994  | 0.0014   | 0.71998   | 614.3              | 6        | 610.6  | 8.5      | 634    | 13       | 610.6    | 8.5      | 0.6          | Single Age   |
| SFB45_38                               | 502   | 1.061  | 0.2189          | 0.0037   | 0.03044 | 0.00044  | -0.021558 | 200.9              | 3.1      | 193.3  | 2.8      | 315    | 24       | 193.3    | 2.8      | 3.8          | Single Age   |
| SFB45_39                               | 193   | 1.19   | 0.6202          | 0.0063   | 0.07938 | 0.00057  | 0.14416   | 489.8              | 3.9      | 492.4  | 3.4      | 473    | 15       | 492.4    | 3.4      | -0.5         | Single Age   |
| SFB45_40                               | 279.1 | 0.789  | 1.0073          | 0.0097   | 0.11424 | 0.00094  | 0.36525   | 707.4              | 4.9      | 697.3  | 5.4      | 728    | 12       | 697.3    | 5.4      | 1.4          | Single Age   |
| SFB45_41                               | 217.4 | 0.89   | 0.762           | 0.01     | 0.08924 | 0.00082  | 0.43635   | 574.9              | 5.8      | 551    | 4.9      | 666    | 15       | 551.0    | 4.9      | 4.2          | Single Age   |
| SFB45_42                               | 901   | 0.874  | 0.7543          | 0.0054   | 0.08786 | 0.00056  | 0.37298   | 570.6              | 3.1      | 542.9  | 3.3      | 686    | 11       | 542.9    | 3.3      | 4.9          | Single Age   |

|           |       |        |        |        |         |         |         |       |     |        |     |        |     |        |      |      |            |
|-----------|-------|--------|--------|--------|---------|---------|---------|-------|-----|--------|-----|--------|-----|--------|------|------|------------|
| SFB45_91  | 97.5  | 0.687  | 4.5    | 0.037  | 0.3067  | 0.0021  | 0.40176 | 1732  | 6.7 | 1724   | 11  | 1757.2 | 9.2 | 1757.2 | 9.2  | 1.9  | Single Age |
| SFB45_92  | 311   | 1.265  | 6.62   | 0.33   | 0.31    | 0.013   | 0.98383 | 2053  | 45  | 1740   | 62  | 2397   | 18  | DISC   | DISC | 27.4 | Single Age |
| SFB45_93  | 166.4 | 0.744  | 0.7914 | 0.0098 | 0.0946  | 0.001   | 0.40996 | 591.7 | 5.5 | 582.6  | 5.9 | 645    | 17  | 582.6  | 5.9  | 1.5  | Single Age |
| SFB45_94  | 240   | 0.902  | 1.22   | 0.014  | 0.1355  | 0.0018  | 0.70773 | 810.3 | 6.8 | 819    | 10  | 817    | 13  | 819.0  | 10.0 | -1.1 | Single Age |
| SFB45_95  | 54.9  | 1.073  | 0.612  | 0.016  | 0.0753  | 0.001   | 0.25894 | 487   | 9.5 | 468.1  | 6   | 576    | 37  | 468.1  | 6.0  | 3.9  | Single Age |
| SFB45_97  | 290   | 1.0237 | 0.274  | 0.0061 | 0.03465 | 0.00038 | 0.44611 | 245.7 | 4.9 | 219.6  | 2.4 | 521    | 37  | DISC   | DISC | 10.6 | Single Age |
| SFB45_98  | 214.2 | 0.6657 | 0.7706 | 0.0087 | 0.09233 | 0.00096 | 0.24468 | 580.5 | 4.9 | 569.3  | 5.7 | 641    | 15  | 569.3  | 5.7  | 1.9  | Single Age |
| SFB45_99  | 591   | 0.771  | 1.755  | 0.017  | 0.1615  | 0.0013  | 0.59676 | 1029  | 6.3 | 964.8  | 7.4 | 1164   | 12  | 1164.0 | 12.0 | 17.1 | Single Age |
| SFB45_100 | 403   | 3.55   | 2.71   | 0.17   | 0.1312  | 0.0042  | 0.82297 | 1316  | 46  | 794    | 24  | 2320   | 60  | DISC   | DISC | 39.7 | Single Age |
| SFB45_101 | 849   | 1.762  | 0.3631 | 0.0052 | 0.0386  | 0.0021  | 0.45941 | 314.4 | 3.9 | 244    | 13  | 882    | 95  | DISC   | DISC | 22.4 | Single Age |
| SFB45_102 | 1171  | 18.8   | 2.112  | 0.067  | 0.1944  | 0.0077  | 0.7722  | 1152  | 22  | 1145   | 41  | 1174   | 25  | 1174.0 | 25.0 | 2.5  | Rim        |
| SFB45_102 | 254   | 1.67   | 2.693  | 0.03   | 0.2215  | 0.0024  | 0.67584 | 1326  | 8.2 | 1290   | 13  | 1388   | 12  | 1388.0 | 12.0 | 7.1  | Core       |
| SFB45_103 | 348   | 6.71   | 3.48   | 0.25   | 0.217   | 0.012   | 0.98982 | 1521  | 53  | 1271   | 64  | 1894   | 27  | DISC   | DISC | 32.9 | Single Age |
| SFB45_104 | 120.2 | 1.12   | 1.494  | 0.017  | 0.1552  | 0.0011  | 0.27853 | 927.3 | 7   | 930.1  | 6.3 | 942    | 12  | 942.0  | 12.0 | 1.3  | Single Age |
| SFB45_105 | 353.6 | 8.8    | 0.5843 | 0.0058 | 0.0724  | 0.00058 | 0.40851 | 467.1 | 3.7 | 450.6  | 3.5 | 574    | 14  | 450.6  | 3.5  | 3.5  | Single Age |
| SFB45_106 | 258   | 0.486  | 10.374 | 0.066  | 0.4659  | 0.0032  | 0.69167 | 2469  | 5.9 | 2466   | 14  | 2472.8 | 5.2 | 2472.8 | 5.2  | 0.3  | Single Age |
| SFB45_107 | 609   | 2.322  | 3.318  | 0.02   | 0.247   | 0.0018  | 0.71885 | 1485  | 4.6 | 1423.1 | 9.5 | 1576.6 | 6.1 | 1576.6 | 6.1  | 9.7  | Single Age |
| SFB45_108 | 186   | 3.85   | 0.3762 | 0.0074 | 0.04939 | 0.00076 | 0.39362 | 324   | 5.5 | 310.8  | 4.7 | 445    | 26  | 310.8  | 4.7  | 4.1  | Single Age |
| SFB45_109 | 130.3 | 1.63   | 1.259  | 0.026  | 0.1382  | 0.0019  | 0.63936 | 827   | 12  | 834    | 11  | 797    | 17  | 834.0  | 11.0 | -0.8 | Single Age |
| SFB45_110 | 399   | 10.1   | 0.7455 | 0.0077 | 0.09185 | 0.00088 | 0.54236 | 565.4 | 4.4 | 566.5  | 5.2 | 568    | 12  | 566.5  | 5.2  | -0.2 | Single Age |
| SFB45_111 | 253   | 1.741  | 0.3748 | 0.0055 | 0.04972 | 0.00063 | 0.49095 | 323.1 | 4   | 312.8  | 3.9 | 413    | 18  | 312.8  | 3.9  | 3.2  | Single Age |
| SFB45_112 | 60.6  | 0.656  | 0.638  | 0.018  | 0.0797  | 0.0011  | 0.16437 | 500   | 11  | 495    | 6.6 | 550    | 34  | 495.0  | 6.6  | 1.0  | Single Age |
| SFB45_113 | 406   | 1.86   | 0.605  | 0.015  | 0.0674  | 0.0014  | 0.83642 | 479.8 | 9.8 | 420.7  | 8.4 | 787    | 21  | DISC   | DISC | 12.3 | Single Age |
| SFB45_114 | 386   | 1.413  | 0.3324 | 0.0045 | 0.04508 | 0.00036 | 0.34607 | 291.3 | 3.4 | 284.2  | 2.2 | 349    | 14  | 284.2  | 2.2  | 2.4  | Single Age |
| SFB45_115 | 101   | 1.432  | 0.97   | 0.013  | 0.1117  | 0.0014  | 0.29914 | 688.2 | 6.6 | 683.4  | 7.8 | 723    | 18  | 683.4  | 7.8  | 0.7  | Single Age |
| SFB45_116 | 452   | 1.167  | 0.768  | 0.01   | 0.0798  | 0.0012  | 0.46492 | 578.2 | 5.8 | 494.7  | 7   | 941    | 14  | DISC   | DISC | 14.4 | Single Age |
| SFB45_117 | 350   | 1.802  | 0.7328 | 0.0073 | 0.08946 | 0.00078 | 0.56635 | 558.1 | 4.3 | 552.3  | 4.6 | 586.8  | 9.3 | 552.3  | 4.6  | 1.0  | Single Age |
| SFB45_118 | 290.9 | 12.2   | 0.4498 | 0.0079 | 0.0541  | 0.0011  | 0.51773 | 378.2 | 5.8 | 339.9  | 6.8 | 615    | 26  | DISC   | DISC | 10.1 | Single Age |
| SFB45_120 | 188   | 1.18   | 0.596  | 0.018  | 0.06063 | 0.00073 | 0.38979 | 474   | 11  | 379.5  | 4.4 | 959    | 43  | DISC   | DISC | 19.9 | Single Age |

| Sample Name:                     |         | 09-SFB 10b |        |                 |          |        |          |       |       |          |                    |          |       |          |          |          |              |              |  |
|----------------------------------|---------|------------|--------|-----------------|----------|--------|----------|-------|-------|----------|--------------------|----------|-------|----------|----------|----------|--------------|--------------|--|
| Lower Marine Molasse (32 ± 1 Ma) |         |            |        | Isotopic Ratios |          |        |          |       |       |          | Apparent Ages (Ma) |          |       |          |          |          |              |              |  |
|                                  |         | U          | U/Th   | 207Pb           | 2σ error | 206Pb  | 2σ error | Error | 207Pb | 2σ error | 206Pb              | 2σ error | 207Pb | 2σ error | Best age | 2σ error | Discordance* | Rim, Core or |  |
| Grain #                          | U (ppm) |            |        | 235U            | (abs.)   | 238U   | (abs.)   | Corr. | 235U  | (Ma)     | 238U               | (Ma)     | 206Pb | (Ma)     | (Ma)     | (Ma)     | %            | Single Age   |  |
| 09SFB10b-1                       | 238     | 2.61       | 0.369  | 0.024           | 0.04903  | 0.0025 | 0.16301  | 317.8 | 16    | 308.5    | 15                 | 392      | 45    | 308.5    | 15.0     | 2.9      | Single Age   |              |  |
| 09SFB10b-2                       | 151     | 4.46       | 0.731  | 0.023           | 0.0894   | 0.0028 | 0.74161  | 556.6 | 13    | 551.6    | 16                 | 587      | 17    | 551.6    | 16.0     | 0.9      | Single Age   |              |  |
| 09SFB10b-3                       | 335     | 3.85       | 0.3648 | 0.02            | 0.04888  | 0.0025 | 0.59376  | 315.6 | 15    | 307.6    | 15                 | 380      | 21    | 307.6    | 15.0     | 2.5      | Single Age   |              |  |
| 09SFB10b-4                       | 666     | 3.24       | 0.4947 | 0.02            | 0.0637   | 0.0025 | 0.64549  | 408.7 | 13    | 398      | 15                 | 477      | 17    | 398.0    | 15.0     | 2.6      | Single Age   |              |  |
| 09SFB10b-5                       | 421     | 12.06      | 0.4917 | 0.02            | 0.0626   | 0.0025 | 0.57828  | 405.8 | 14    | 391.6    | 15                 | 463      | 20    | 391.6    | 15.0     | 3.5      | Single Age   |              |  |
| 09SFB10b-6                       | 942     | 9.72       | 0.3603 | 0.019           | 0.04897  | 0.0024 | 0.57465  | 312.8 | 15    | 308.2    | 15                 | 347      | 18    | 308.2    | 15.0     | 1.5      | Single Age   |              |  |
| 09SFB10b-7                       | 299     | 3.31       | 2.416  | 0.073           | 0.1994   | 0.0052 | 0.86069  | 1249  | 21    | 1172     | 28                 | 1391     | 20    | 1391.0   | 20.0     | 15.7     | Single Age   |              |  |
| 09SFB10b-8                       | 106     | 2.66       | 0.649  | 0.033           | 0.0801   | 0.0036 | 0.86886  | 506   | 21    | 496      | 22                 | 585      | 19    | 496.0    | 22.0     | 2.0      | Single Age   |              |  |
| 09SFB10b-9                       | 870     | 2.715      | 0.0428 | 0.019           | 0.00588  | 0.0023 | 0.079773 | 42.5  | 18    | 37.77    | 15                 | 328      | 67    | DISC     | DISC     | 11.1     | Single Age   |              |  |
| 09SFB10b-10                      | 442     | 13.1       | 0.4417 | 0.021           | 0.0571   | 0.0025 | 0.73907  | 371.2 | 14    | 357.9    | 15                 | 465      | 20    | 357.9    | 15.0     | 3.6      | Single Age   |              |  |
| 09SFB10b-11                      | 313     | 1.244      | 0.4302 | 0.021           | 0.05466  | 0.0024 | 0.51016  | 363   | 15    | 343      | 15                 | 484      | 30    | 343.0    | 15.0     | 5.5      | Single Age   |              |  |
| 09SFB10b-12                      | 780     | 19.9       | 0.3791 | 0.019           | 0.05084  | 0.0024 | 0.77788  | 326.2 | 14    | 319.6    | 15                 | 384      | 12    | 319.6    | 15.0     | 2.0      | Single Age   |              |  |
| 09SFB10b-13                      | 70.6    | 2.918      | 2.645  | 0.047           | 0.2146   | 0.0042 | 0.51605  | 1312  | 13    | 1259     | 22                 | 1391     | 18    | 1391.0   | 18.0     | 9.5      | Single Age   |              |  |
| 09SFB10b-14                      | 75.3    | 1.192      | 3.93   | 0.13            | 0.2299   | 0.0064 | 0.91845  | 1613  | 27    | 1336     | 34                 | 2005     | 14    | DISC     | DISC     | 33.4     | Single Age   |              |  |
| 09SFB10b-15                      | 62.1    | 2.72       | 1.39   | 0.056           | 0.0966   | 0.0027 | 0.30917  | 881   | 23    | 594.2    | 16                 | 1710     | 59    | DISC     | DISC     | 32.6     | Single Age   |              |  |
| 09SFB10b-16                      | 1119    | 7.38       | 0.432  | 0.023           | 0.0476   | 0.003  | 0.28466  | 365   | 17    | 299      | 19                 | 828      | 87    | DISC     | DISC     | 18.1     | Single Age   |              |  |
| 09SFB10b-17                      | 1924    | 3.7        | 0.349  | 0.026           | 0.04093  | 0.0024 | 0.87648  | 303   | 19    | 258.6    | 15                 | 646      | 65    | DISC     | DISC     | 14.7     | Single Age   |              |  |
| 09SFB10b-18                      | 68.5    | 3.4        | 0.776  | 0.032           | 0.0945   | 0.0037 | 0.77349  | 583   | 18    | 582      | 22                 | 608      | 27    | 582.0    | 22.0     | 0.2      | Single Age   |              |  |
| 09SFB10b-19                      | 290     | 7.4        | 0.545  | 0.029           | 0.0704   | 0.0033 | 0.91523  | 440   | 19    | 438      | 20                 | 467      | 19    | 438.0    | 20.0     | 0.5      | Single Age   |              |  |
| 09SFB10b-20                      | 440     | 2.574      | 0.534  | 0.025           | 0.0634   | 0.0027 | 0.81803  | 433   | 16    | 396.2    | 17                 | 634      | 24    | 396.2    | 17.0     | 8.5      | Single Age   |              |  |
| 09SFB10b-21                      | 298     | 6.2        | 0.553  | 0.024           | 0.0685   | 0.0033 | 0.7314   | 447   | 16    | 427      | 20                 | 584      | 30    | 427.0    | 20.0     | 4.5      | Single Age   |              |  |
| 09SFB10b-22                      | 1050    | 1.462      | 0.55   | 0.039           | 0.0393   | 0.0032 | 0.79186  | 443   | 25    | 248      | 20                 | 1680     | 77    | DISC     | DISC     | 44.0     | Single Age   |              |  |
| 09SFB10b-23                      | 393.4   | 1.75       | 0.5423 | 0.02            | 0.06981  | 0.0024 | 0.33152  | 439.7 | 13    | 435      | 15                 | 474      | 24    | 435.0    | 15.0     | 1.1      | Single Age   |              |  |
| 09SFB10b-24                      | 78.4    | 1.539      | 11     | 0.2             | 0.4515   | 0.0076 | 0.75857  | 2521  | 17    | 2401     | 34                 | 2611     | 16    | 2611.0   | 16.0     | 8.0      | Single Age   |              |  |
| 09SFB10b-25                      | 94      | 1.554      | 0.499  | 0.029           | 0.0533   | 0.0026 | -0.31748 | 409   | 20    | 335      | 16                 | 850      | 120   | DISC     | DISC     | 18.1     | Single Age   |              |  |
| 09SFB10b-26                      | 559.7   | 2.258      | 0.4149 | 0.02            | 0.0546   | 0.0026 | 0.72388  | 353.6 | 15    | 342.6    | 16                 | 426      | 27    | 342.6    | 16.0     | 3.1      | Single Age   |              |  |
| 09SFB10b-27                      | 230.8   | 1.437      | 1.031  | 0.034           | 0.1101   | 0.0032 | 0.64964  | 718   | 17    | 673      | 18                 | 868      | 35    | 673.0    | 18.0     | 6.3      | Single Age   |              |  |
| 09SFB10b-28                      | 724     | 3.57       | 0.695  | 0.03            | 0.0656   | 0.0033 | -0.43914 | 534   | 18    | 409      | 20                 | 1100     | 130   | DISC     | DISC     | 23.4     | Single Age   |              |  |
| 09SFB10b-29                      | 96.6    | 2.73       | 1.459  | 0.037           | 0.1405   | 0.0039 | 0.86197  | 912   | 16    | 847      | 22                 | 1045     | 17    | 847.0    | 22.0     | 7.1      | Single Age   |              |  |
| 09SFB10b-30                      | 83.7    | 1.151      | 7.15   | 0.52            | 0.248    | 0.017  | 0.9809   | 2108  | 61    | 1429     | 89                 | 2911     | 19    | DISC     | DISC     | 50.9     | Single Age   |              |  |
| 09SFB10b-31                      |         |            |        |                 |          |        |          |       |       |          |                    |          |       |          |          |          |              |              |  |

|              |       |       |        |       |         |        |          |       |    |       |    |      |     |        |      |      |            |
|--------------|-------|-------|--------|-------|---------|--------|----------|-------|----|-------|----|------|-----|--------|------|------|------------|
| 09SFB10b-76  | 532   | 9.18  | 0.701  | 0.058 | 0.0684  | 0.0027 | -0.24759 | 533   | 33 | 426.2 | 16 | 1070 | 180 | DISC   | DISC | 20.0 | Single Age |
| 09SFB10b-77  | 307   | 4.18  | 0.697  | 0.021 | 0.0863  | 0.0027 | 0.67793  | 537.8 | 13 | 533.5 | 16 | 556  | 16  | 533.5  | 16.0 | 0.8  | Single Age |
| 09SFB10b-78  | 361.3 | 0.991 | 0.836  | 0.022 | 0.099   | 0.003  | 0.61844  | 616.4 | 12 | 608   | 17 | 653  | 21  | 608.0  | 17.0 | 1.4  | Single Age |
| 09SFB10b-79  | 129.6 | 0.962 | 0.812  | 0.044 | 0.0906  | 0.0031 | 0.65825  | 601   | 22 | 559   | 19 | 780  | 58  | 559.0  | 19.0 | 7.0  | Single Age |
| 09SFB10b-80  | 172.8 | 1.608 | 5.76   | 0.16  | 0.3425  | 0.0094 | 0.80189  | 1939  | 24 | 1898  | 45 | 2000 | 20  | 2000.0 | 20.0 | 5.1  | Single Age |
| 09SFB10b-81  | 268   | 3.47  | 0.426  | 0.025 | 0.0475  | 0.0024 | 0.33204  | 359   | 18 | 299.1 | 15 | 827  | 85  | DISC   | DISC | 16.7 | Single Age |
| 09SFB10b-82  | 364.2 | 5.1   | 0.582  | 0.026 | 0.071   | 0.0032 | 0.87961  | 465   | 17 | 442   | 19 | 556  | 23  | 442.0  | 19.0 | 4.9  | Single Age |
| 09SFB10b-83  | 377   | 1.238 | 0.3841 | 0.019 | 0.05246 | 0.0024 | 0.53252  | 330.6 | 14 | 329.6 | 15 | 338  | 21  | 329.6  | 15.0 | 0.3  | Single Age |
| 09SFB10b-84  | 148.8 | 5.3   | 0.778  | 0.023 | 0.0935  | 0.0029 | 0.66898  | 585.7 | 14 | 576   | 17 | 639  | 25  | 576.0  | 17.0 | 1.7  | Single Age |
| 09SFB10b-85  | 744   | 8.8   | 0.545  | 0.031 | 0.0701  | 0.0035 | 0.96711  | 439   | 20 | 436   | 21 | 465  | 20  | 436.0  | 21.0 | 0.7  | Single Age |
| 09SFB10b-86  | 424   | 3.27  | 0.618  | 0.038 | 0.0639  | 0.0037 | 0.92193  | 487   | 24 | 399   | 22 | 943  | 29  | DISC   | DISC | 18.1 | Single Age |
| 09SFB10b-87  | 263.4 | 1.93  | 2      | 0.13  | 0.1565  | 0.0075 | 0.95891  | 1111  | 44 | 941   | 43 | 1452 | 39  | DISC   | DISC | 35.2 | Single Age |
| 09SFB10b-88  | 401.2 | 1.813 | 0.3667 | 0.02  | 0.04888 | 0.0024 | 0.60234  | 317   | 15 | 307.6 | 15 | 389  | 21  | 307.6  | 15.0 | 3.0  | Single Age |
| 09SFB10b-89  | 103.4 | 2.014 | 1.079  | 0.028 | 0.1204  | 0.003  | 0.53757  | 744   | 14 | 732   | 17 | 796  | 22  | 732.0  | 17.0 | 1.6  | Single Age |
| 09SFB10b-90  | 257.7 | 3.73  | 0.73   | 0.021 | 0.0888  | 0.0026 | 0.55416  | 556.1 | 12 | 549.4 | 15 | 590  | 17  | 549.4  | 15.0 | 1.2  | Single Age |
| 09SFB10b-91  | 222   | 7.32  | 0.764  | 0.029 | 0.0928  | 0.0029 | 0.63496  | 575   | 16 | 572   | 17 | 604  | 30  | 572.0  | 17.0 | 0.5  | Single Age |
| 09SFB10b-92  | 483   | 21.6  | 0.3871 | 0.02  | 0.05183 | 0.0024 | 0.71538  | 332   | 14 | 325.7 | 15 | 377  | 20  | 325.7  | 15.0 | 1.9  | Single Age |
| 09SFB10b-93  | 743   | 4.28  | 0.5067 | 0.02  | 0.0621  | 0.0024 | 0.53421  | 416   | 13 | 388.4 | 15 | 567  | 33  | 388.4  | 15.0 | 6.6  | Single Age |
| 09SFB10b-94  | 650   | 3.485 | 1.275  | 0.035 | 0.1316  | 0.0036 | 0.81116  | 833   | 16 | 796   | 20 | 944  | 18  | 796.0  | 20.0 | 4.4  | Single Age |
| 09SFB10b-95  | 252   | 2.68  | 1.82   | 0.033 | 0.1766  | 0.0034 | 0.54805  | 1053  | 12 | 1048  | 19 | 1059 | 17  | 1059.0 | 17.0 | 1.0  | Single Age |
| 09SFB10b-96  | 221   | 4.78  | 8.51   | 0.29  | 0.429   | 0.01   | 0.83343  | 2295  | 32 | 2308  | 49 | 2265 | 31  | 2265.0 | 31.0 | -1.9 | Single Age |
| 09SFB10b-97  | 171   | 2.76  | 1.417  | 0.083 | 0.1484  | 0.0067 | 0.95669  | 890   | 36 | 890   | 38 | 940  | 29  | 940.0  | 29.0 | 5.3  | Single Age |
| 09SFB10b-98  | 294   | 1.318 | 0.801  | 0.022 | 0.0942  | 0.0026 | 0.56023  | 596.7 | 12 | 581.2 | 15 | 654  | 17  | 581.2  | 15.0 | 2.6  | Single Age |
| 09SFB10b-99  | 377   | 4.37  | 0.548  | 0.02  | 0.0709  | 0.0025 | 0.59948  | 443.4 | 13 | 441.7 | 15 | 473  | 18  | 441.7  | 15.0 | 0.4  | Single Age |
| 09SFB10b-100 | 208   | 4.06  | 0.537  | 0.025 | 0.0576  | 0.0027 | 0.64912  | 435   | 17 | 361   | 16 | 830  | 28  | DISC   | DISC | 17.0 | Single Age |
| 09SFB10b-101 | 218   | 2.81  | 0.416  | 0.023 | 0.0527  | 0.0025 | 0.57631  | 352.7 | 16 | 331.1 | 15 | 449  | 43  | 331.1  | 15.0 | 6.1  | Single Age |
| 09SFB10b-102 | 473   | 8     | 0.565  | 0.043 | 0.0698  | 0.003  | 0.81878  | 451   | 25 | 435   | 18 | 508  | 45  | 435.0  | 18.0 | 3.5  | Single Age |
| 09SFB10b-103 | 314   | 6.39  | 0.58   | 0.049 | 0.0729  | 0.0026 | 0.67086  | 451   | 16 | 453.4 | 16 | 472  | 58  | 453.4  | 16.0 | -0.5 | Single Age |
| 09SFB10b-104 | 402   | 4.47  | 9.18   | 0.48  | 0.386   | 0.015  | 0.81144  | 2341  | 47 | 2099  | 72 | 2546 | 37  | 2546.0 | 37.0 | 17.6 | Single Age |
| 09SFB10b-105 | 455   | 0.667 | 0.721  | 0.032 | 0.0874  | 0.0034 | 0.8859   | 552   | 18 | 540   | 20 | 654  | 26  | 540.0  | 20.0 | 2.2  | Single Age |
| 09SFB10b-106 | 367   | 0.872 | 0.3719 | 0.02  | 0.04988 | 0.0023 | 0.65809  | 320.9 | 15 | 313.8 | 14 | 378  | 25  | 313.8  | 14.0 | 2.2  | Single Age |
| 09SFB10b-107 | 114.9 | 3.64  | 0.581  | 0.033 | 0.0545  | 0.0026 | 0.29032  | 463   | 21 | 342.3 | 16 | 1129 | 89  | DISC   | DISC | 26.1 | Single Age |
| 09SFB10b-108 | 149.1 | 3.23  | 5.09   | 0.14  | 0.1021  | 0.0033 | 0.84913  | 1832  | 23 | 626   | 19 | 3763 | 13  | DISC   | DISC | 65.8 | Single Age |
| 09SFB10b-109 | 70.4  | 3.43  | 0.939  | 0.065 | 0.0777  | 0.0028 | 0.31486  | 672   | 35 | 482.1 | 17 | 1340 | 120 | DISC   | DISC | 28.3 | Single Age |
| 09SFB10b-110 | 235   | 9.47  | 0.553  | 0.024 | 0.0677  | 0.0028 | 0.76492  | 446   | 16 | 422   | 17 | 583  | 25  | 422.0  | 17.0 | 5.4  | Single Age |
| 09SFB10b-111 | 392   | 8.62  | 0.583  | 0.021 | 0.0728  | 0.0025 | 0.72826  | 467.2 | 13 | 452.8 | 15 | 549  | 18  | 452.8  | 15.0 | 3.1  | Single Age |
| 09SFB10b-112 | 274   | 2.5   | 3.061  | 0.094 | 0.2148  | 0.0066 | 0.84979  | 1418  | 24 | 1257  | 36 | 1669 | 22  | DISC   | DISC | 24.6 | Single Age |
| 09SFB10b-113 | 248   | 20.2  | 0.475  | 0.021 | 0.0613  | 0.0025 | 0.67154  | 394.5 | 14 | 383.8 | 15 | 460  | 20  | 383.6  | 15.0 | 2.8  | Single Age |
| 09SFB10b-114 | 106.4 | 1.383 | 0.74   | 0.026 | 0.0891  | 0.0027 | 0.58303  | 563   | 15 | 551.5 | 16 | 599  | 23  | 551.5  | 16.0 | 2.0  | Single Age |
| 09SFB10b-115 | 313   | 2.278 | 0.3364 | 0.019 | 0.04556 | 0.0024 | 0.58531  | 294.3 | 15 | 287.2 | 15 | 345  | 20  | 287.2  | 15.0 | 2.4  | Single Age |
| 09SFB10b-116 | 596   | 5.35  | 0.412  | 0.023 | 0.052   | 0.0027 | 0.8705   | 349   | 17 | 326.8 | 17 | 506  | 22  | 326.8  | 17.0 | 6.4  | Single Age |
| 09SFB10b-117 | 386   | 5.02  | 0.3842 | 0.02  | 0.05055 | 0.0024 | 0.62917  | 329.9 | 14 | 317.9 | 15 | 409  | 18  | 317.9  | 15.0 | 3.6  | Single Age |
| 09SFB10b-118 | 442   | 2.34  | 0.666  | 0.022 | 0.083   | 0.0027 | 0.70253  | 517.8 | 14 | 513.8 | 16 | 543  | 20  | 513.8  | 16.0 | 0.8  | Single Age |
| 09SFB10b-119 | 516   | 10.51 | 0.489  | 0.021 | 0.0628  | 0.0027 | 0.74047  | 404.3 | 14 | 392.3 | 16 | 489  | 25  | 392.3  | 16.0 | 3.0  | Single Age |
| 09SFB10b-120 | 92.7  | 2.89  | 1.177  | 0.028 | 0.1268  | 0.0031 | 0.5677   | 789   | 13 | 769   | 18 | 823  | 20  | 769.0  | 18.0 | 2.5  | Single Age |
| 09SFB10b-121 | 187   | 3.37  | 0.3977 | 0.021 | 0.04927 | 0.0024 | 0.49571  | 339.6 | 15 | 310   | 15 | 555  | 26  | 310.0  | 15.0 | 8.7  | Single Age |
| 09SFB10b-122 | 119   | 4.22  | 1.832  | 0.035 | 0.1728  | 0.0038 | 0.57736  | 1056  | 12 | 1027  | 21 | 1132 | 19  | 1132.0 | 19.0 | 9.3  | Single Age |
| 09SFB10b-123 | 78.6  | 1.134 | 0.776  | 0.034 | 0.0894  | 0.0034 | 0.75189  | 581   | 19 | 552   | 20 | 698  | 34  | 552.0  | 20.0 | 5.0  | Single Age |
| 09SFB10b-124 | 543   | 2.66  | 0.3616 | 0.019 | 0.04814 | 0.0024 | 0.60165  | 313.3 | 14 | 303.1 | 15 | 379  | 22  | 303.1  | 15.0 | 3.3  | Single Age |
| 09SFB10b-125 | 472   | 25.9  | 0.59   | 0.024 | 0.0723  | 0.0028 | 0.77794  | 470.3 | 15 | 449.7 | 17 | 556  | 23  | 449.7  | 17.0 | 4.4  | Single Age |
| 09SFB10b-126 | 727   | 85    | 0.463  | 0.021 | 0.0603  | 0.0026 | 0.72826  | 385.8 | 15 | 377.4 | 16 | 423  | 21  | 377.4  | 16.0 | 2.2  | Single Age |
| 09SFB10b-127 | 527   | 7.3   | 0.653  | 0.033 | 0.08    | 0.0035 | 0.9149   | 512   | 20 | 496   | 21 | 556  | 27  | 496.0  | 21.0 | 3.1  | Single Age |
| 09SFB10b-128 | 225   | 3.6   | 0.56   | 0.021 | 0.07238 | 0.0024 | 0.44207  | 450.8 | 14 | 451.3 | 15 | 446  | 22  | 451.3  | 15.0 | -0.1 | Single Age |
| 09SFB10b-129 | 333   | 5.3   | 0.702  | 0.03  | 0.0808  | 0.0027 | 0.75411  | 538   | 18 | 500.7 | 16 | 707  | 42  | 500.7  | 16.0 | 6.9  | Single Age |
| 09SFB10b-130 | 195   | 10.26 | 0.632  | 0.024 | 0.0788  | 0.0027 | 0.69066  | 496.9 | 15 | 488.7 | 16 | 544  | 19  | 488.7  | 16.0 | 1.7  | Single Age |
| 09SFB10b-131 | 1355  | 3.35  | 0.2804 | 0.019 | 0.03854 | 0.0023 | 0.58664  | 251.4 | 15 | 243.7 | 14 | 312  | 22  | 243.7  | 14.0 | 3.1  | Single Age |
| 09SFB10b-132 | 349.9 | 3.692 | 0.6157 | 0.021 | 0.0758  | 0.0025 | 0.55147  | 486.8 | 13 | 470.8 | 15 | 561  | 18  | 470.8  | 15.0 | 3.3  | Single Age |
| 09SFB10b-133 | 527.9 | 15.03 | 0.51   | 0.027 | 0.0631  | 0.0028 | 0.8501   | 418   | 18 | 394.4 | 17 | 557  | 43  | 394.4  | 17.0 | 5.6  | Single Age |
| 09SFB10b-134 | 213.8 | 5.32  | 0.583  | 0.021 | 0.0716  | 0.0025 | 0.35353  | 466.2 | 14 | 445.7 | 15 | 567  | 27  | 445.7  | 15.0 | 4.4  | Single Age |
| 09SFB10b-135 | 1330  | 14.62 | 0.515  | 0.036 | 0.0637  | 0.0044 | 0.95196  | 418   | 25 | 397   | 27 | 551  | 33  | 397.0  | 27.0 | 5.0  | Single Age |
| 09SFB10b-136 | 244.5 | 8.64  | 1.837  | 0.057 | 0.1259  | 0.0034 | 0.79357  | 1059  | 20 | 764   | 19 | 1726 | 32  | DISC   | DISC | 27.9 | Single Age |
| 09SFB10b-137 | 479   | 7.37  | 0.5234 | 0.021 | 0.0669  | 0.0025 | 0.72503  | 427.9 | 14 | 417.3 | 15 | 485  | 15  | 417.3  | 15.0 | 2.5  | Single Age |
| 09SFB10b-138 | 231   | 3.11  | 0.606  | 0.022 | 0.0743  | 0.0026 | 0.69672  | 480.4 | 14 | 461.8 | 16 | 573  | 20  | 461.8  | 16.0 | 3.9  | Single Age |
| 09SFB10b-139 | 372   | 2.84  | 0.532  | 0.029 | 0.0621  | 0.0029 | 0.76001  | 431   | 19 | 388   | 17 | 713  | 38  | 388.0  | 17.0 | 10.0 | Single Age |
| 09SFB10b-140 | 329   | 7.8   | 0.589  | 0.024 | 0.0675  | 0.0026 | 0.35054  | 472   | 16 | 421.1 | 16 | 699  | 45  | DISC   | DISC | 10.8 | Single Age |
| 09SFB10b-141 | 74.8  | 1.422 | 8.06   | 0.2   | 0.3617  | 0.0073 | 0.83994  | 2238  | 22 | 1989  | 35 | 2480 | 13  | 2480.0 | 13.0 | 19.8 | Single Age |
| 09SFB10b-142 | 692   | 1.3   | 2.639  | 0.066 | 0.16    | 0.0038 | 0.8816   | 1309  | 19 | 959   | 20 | 1935 | 18  | DISC   | DISC | 50.4 | Single Age |
| 09SFB10b-143 | 549.5 | 1.84  | 0.3931 | 0.019 | 0.05131 | 0.0024 | 0.50484  | 336.5 | 14 | 322.5 | 14 | 433  | 19  | 322.5  | 14.0 | 4.2  | Single Age |
| 09SFB10b-144 | 130.4 | 1.825 | 0.594  | 0.022 | 0.0738  | 0.0025 | 0.44339  | 473.3 | 14 | 459.2 | 15 | 560  | 23  | 459.2  | 15.0 | 3.0  | Single Age |
| 09SFB10b-145 | 328   | 71.1  | 0.426  | 0.021 | 0.05646 | 0.0025 | 0.55853  | 361.5 | 15 | 354   | 15 | 409  | 24  | 354.0  | 15.0 | 2.1  | Single Age |
| 09SFB10b-146 | 528   | 11.1  | 0.4885 | 0.02  | 0.0629  | 0.0025 | 0.37388  | 404.5 | 13 | 393.9 | 15 | 480  | 29  | 393.9  | 15.0 | 2.6  | Single Age |
| 09SFB10b-147 | 453   | 6.8   | 0.726  | 0.04  | 0.0799  | 0.003  | 0.64294  |       |    |       |    |      |     |        |      |      |            |

|             |       |        |        |         |          |         |          |       |       |       |     |        |       |        |      |            |            |
|-------------|-------|--------|--------|---------|----------|---------|----------|-------|-------|-------|-----|--------|-------|--------|------|------------|------------|
| 09SFB02-33  | 130.1 | 1.161  | 0.88   | 0.018   | 0.1035   | 0.0016  | 0.41522  | 640.6 | 9.6   | 634.7 | 9.5 | 650    | 23    | 634.7  | 9.5  | 0.9        | Single Age |
| 09SFB02-34  | 463   | 263    | 0.462  | 0.017   | 0.0633   | 0.0022  | 0.68993  | 385   | 12    | 397   | 13  | 344    | 36    | 397.0  | 13.0 | 3.1        | Single Age |
| 09SFB02-35  | 178.9 | 2.295  | 0.415  | 0.015   | 0.0558   | 0.0016  | 0.31918  | 352.4 | 10    | 349.9 | 9.9 | 391    | 47    | 349.9  | 9.9  | 0.7        | Single Age |
| 09SFB02-36  | 131.3 | 0.3257 | 0.012  | 0.04513 | 0.0014   | 0.49287 | 286.1    | 9.2   | 284.5 | 8.5   | 315 | 28     | 284.5 | 8.5    | 0.6  | Single Age |            |
| 09SFB02-37  | 321   | 7.32   | 0.4349 | 0.013   | 0.058    | 0.0015  | 0.60453  | 366.5 | 9.4   | 363.2 | 9.2 | 392    | 17    | 363.2  | 9.2  | 0.9        | Single Age |
| 09SFB02-38  | 155   | 5.39   | 0.575  | 0.019   | 0.0735   | 0.002   | 0.75368  | 461   | 12    | 457   | 12  | 504    | 27    | 457.0  | 12.0 | 0.9        | Single Age |
| 09SFB02-39  | 117.1 | 1.134  | 0.998  | 0.021   | 0.1123   | 0.0018  | 0.60249  | 702.2 | 11    | 685.9 | 10  | 764    | 17    | 685.9  | 10.0 | 2.3        | Single Age |
| 09SFB02-40  | 299   | 1.69   | 0.861  | 0.018   | 0.1029   | 0.0019  | 0.5606   | 630.3 | 9.8   | 631.2 | 11  | 644    | 18    | 631.2  | 11.0 | 0.1        | Single Age |
| 09SFB02-41  | 548   | 12.2   | 0.5862 | 0.012   | 0.0752   | 0.0015  | 0.66361  | 468.2 | 7.8   | 467.6 | 9   | 468    | 13    | 467.6  | 9.0  | 0.1        | Single Age |
| 09SFB02-42  | 240   | 16.62  | 0.605  | 0.015   | 0.0767   | 0.0018  | 0.612    | 480.2 | 9.5   | 476.1 | 11  | 508    | 24    | 476.1  | 11.0 | 0.9        | Single Age |
| 09SFB02-43  | 117.7 | 1.605  | 0.823  | 0.017   | 0.096    | 0.0016  | 0.68494  | 609.2 | 9.3   | 590.7 | 9.7 | 676    | 16    | 590.7  | 9.7  | 3.0        | Single Age |
| 09SFB02-44  | 194   | 2.75   | 0.575  | 0.029   | 0.0748   | 0.003   | 0.58973  | 460   | 19    | 465   | 18  | 437    | 48    | 465.0  | 18.0 | 1.1        | Single Age |
| 09SFB02-45  | 156.4 | 22.9   | 0.741  | 0.015   | 0.0911   | 0.0019  | 0.55688  | 562.6 | 8.7   | 562.1 | 11  | 561    | 19    | 562.1  | 11.0 | 0.1        | Single Age |
| 09SFB02-46  | 84.7  | 1.291  | 0.868  | 0.024   | 0.0994   | 0.0017  | 0.45465  | 634   | 13    | 610.7 | 9.8 | 747    | 31    | 610.7  | 9.8  | 3.7        | Single Age |
| 09SFB02-47  | 283   | 3.19   | 0.603  | 0.02    | 0.0771   | 0.0021  | 0.59026  | 479   | 12    | 478   | 13  | 502    | 38    | 478.0  | 13.0 | 0.2        | Single Age |
| 09SFB02-48  | 95    | 2.154  | 0.767  | 0.024   | 0.0934   | 0.0023  | 0.61957  | 577   | 14    | 576   | 14  | 604    | 22    | 576.0  | 14.0 | 0.2        | Single Age |
| 09SFB02-49  | 252   | 12     | 12.12  | 0.17    | 0.4847   | 0.0062  | 0.77069  | 2613  | 13    | 2550  | 27  | 2668   | 11    | 2668.0 | 11.0 | 4.4        | Single Age |
| 09SFB02-50  | 386   | 3.96   | 0.5721 | 0.013   | 0.0738   | 0.0016  | 0.64794  | 459.1 | 8.6   | 458.8 | 9.8 | 469    | 15    | 458.8  | 9.8  | 0.1        | Single Age |
| 09SFB02-52  | 161   | 35.6   | 9.62   | 0.32    | 0.412    | 0.016   | 0.83918  | 2401  | 32    | 2220  | 70  | 2528   | 31    | 2528.0 | 31.0 | 12.2       | Single Age |
| 09SFB02-53  | 37    | 1.113  | 0.836  | 0.033   | 0.0974   | 0.0025  | 0.36136  | 616   | 18    | 599   | 15  | 678    | 48    | 599.0  | 15.0 | 2.8        | Single Age |
| 09SFB02-54  | 112   | 12.5   | 0.618  | 0.026   | 0.0779   | 0.0029  | 0.8312   | 488   | 16    | 484   | 17  | 545    | 39    | 484.0  | 17.0 | 0.8        | Single Age |
| 09SFB02-55  | 130   | 1.486  | 0.756  | 0.018   | 0.0921   | 0.0021  | 0.70221  | 571.9 | 10    | 568   | 12  | 609    | 17    | 568.0  | 12.0 | 0.7        | Single Age |
| 09SFB02-56  | 208.4 | 2.41   | 1.197  | 0.02    | 0.1276   | 0.0022  | 0.77922  | 798.8 | 9.1   | 774   | 12  | 858    | 13    | 774.0  | 12.0 | 3.1        | Single Age |
| 09SFB02-57  | 177.7 | 1.46   | 0.896  | 0.031   | 0.0977   | 0.0017  | 0.48049  | 648   | 16    | 601.1 | 9.9 | 843    | 54    | 601.1  | 9.9  | 7.2        | Single Age |
| 09SFB02-59  | 230.1 | 2.88   | 0.039  | 0.0097  | 0.0061   | 0.0011  | 0.1496   | 38.9  | 9.5   | 39.19 | 6.8 | 255    | 52    | DISC   | DISC | 0.7        | Single Age |
| 09SFB02-61  | 240   | 6.64   | 0.89   | 0.03    | 0.1057   | 0.0027  | 0.54749  | 645   | 16    | 647   | 16  | 653    | 31    | 647.0  | 16.0 | 0.3        | Single Age |
| 09SFB02-62  | 153   | 7.58   | 0.574  | 0.015   | 0.0727   | 0.0017  | 0.53775  | 460   | 9.5   | 453.2 | 9.7 | 514    | 21    | 453.2  | 9.7  | 1.5        | Single Age |
| 09SFB02-63  | 404   | 5.16   | 0.5684 | 0.012   | 0.07236  | 0.0014  | 0.49188  | 456.8 | 7.9   | 450.3 | 8.4 | 489    | 24    | 450.3  | 8.4  | 1.4        | Single Age |
| 09SFB02-64  | 171.1 | 16.24  | 1.667  | 0.029   | 0.1646   | 0.0031  | 0.66519  | 996   | 11    | 962   | 17  | 1029   | 13    | 1029.0 | 13.0 | 4.6        | Single Age |
| 09SFB02-65  | 522   | 3.92   | 0.785  | 0.012   | 0.0957   | 0.0015  | 0.60201  | 588.2 | 6.9   | 588.8 | 8.6 | 586    | 12    | 588.8  | 8.6  | 0.1        | Single Age |
| 09SFB02-66  | 52.8  | 1.358  | 0.671  | 0.016   | 0.0834   | 0.0017  | 0.43604  | 520.9 | 8.8   | 516.2 | 10  | 570    | 23    | 516.2  | 10.0 | 0.9        | Single Age |
| 09SFB02-67  | 566   | 6.23   | 0.5992 | 0.014   | 0.0746   | 0.0017  | 0.74575  | 476.5 | 8.6   | 463.8 | 10  | 546    | 15    | 463.8  | 10.0 | 2.7        | Single Age |
| 09SFB02-68  | 250.6 | 2.106  | 0.32   | 0.011   | 0.04443  | 0.0012  | 0.16712  | 281.8 | 8.2   | 280.2 | 7.4 | 294    | 23    | 280.2  | 7.4  | 0.6        | Single Age |
| 09SFB02-69  | 150.8 | 2.259  | 0.3431 | 0.012   | 0.0451   | 0.0012  | 0.47879  | 299.3 | 8.8   | 284.3 | 7.3 | 434    | 23    | 284.3  | 7.3  | 5.0        | Single Age |
| 09SFB02-70  | 121.5 | 3.13   | 0.987  | 0.018   | 0.1146   | 0.002   | 0.20936  | 696.9 | 9.3   | 699.1 | 12  | 693    | 25    | 699.1  | 12.0 | 0.3        | Single Age |
| 09SFB02-71  | 32.59 | 3.162  | 0.98   | 0.025   | 0.1133   | 0.0022  | 0.22489  | 692   | 13    | 692   | 13  | 700    | 29    | 692.0  | 13.0 | 0.0        | Single Age |
| 09SFB02-72  | 262   | 3.38   | 2.55   | 0.21    | 0.184    | 0.012   | 0.96225  | 1280  | 61    | 1085  | 67  | 1637   | 30    | DISC   | DISC | 33.7       | Single Age |
| 09SFB02-73  | 245.4 | 2.18   | 5.36   | 0.13    | 0.2967   | 0.007   | 0.93008  | 1882  | 22    | 1669  | 35  | 2109.7 | 7.8   | DISC   | DISC | 20.9       | Single Age |
| 09SFB02-74  | 154   | 1.689  | 0.148  | 0.014   | 0.00717  | 0.0011  | 0.35714  | 139.2 | 13    | 46.1  | 6.8 | 2260   | 100   | DISC   | DISC | 66.9       | Single Age |
| 09SFB02-75  | 181.3 | 5.04   | 0.6209 | 0.013   | 0.077    | 0.0015  | 0.35054  | 490.2 | 7.9   | 478.3 | 8.8 | 554    | 20    | 478.3  | 8.8  | 2.4        | Single Age |
| 09SFB02-76  | 337   | 2.07   | 0.613  | 0.016   | 0.0774   | 0.0019  | 0.80034  | 485.4 | 10    | 480.5 | 12  | 522    | 16    | 480.5  | 12.0 | 1.0        | Single Age |
| 09SFB02-77  | 192   | 3.26   | 0.6859 | 0.013   | 0.08565  | 0.0014  | 0.56113  | 530.1 | 7.9   | 529.7 | 8.5 | 533    | 17    | 529.7  | 8.5  | 0.1        | Single Age |
| 09SFB02-78  | 327   | 2.867  | 0.364  | 0.012   | 0.05031  | 0.0014  | 0.70356  | 315.9 | 9.5   | 316.4 | 8.6 | 316    | 17    | 316.4  | 8.6  | 0.2        | Single Age |
| 09SFB02-79  | 241   | 4.52   | 0.661  | 0.014   | 0.0835   | 0.0017  | 0.46215  | 515   | 8.7   | 516.7 | 10  | 518    | 18    | 516.7  | 10.0 | 0.3        | Single Age |
| 09SFB02-80  | 662   | 35.5   | 0.606  | 0.022   | 0.0772   | 0.002   | 0.53963  | 481   | 14    | 479.2 | 12  | 481    | 29    | 479.2  | 12.0 | 0.4        | Single Age |
| 09SFB02-81  | 340   | 15.45  | 0.6034 | 0.013   | 0.0772   | 0.0017  | 0.68246  | 479.8 | 8     | 479.4 | 9.9 | 485    | 15    | 479.4  | 9.9  | 0.1        | Single Age |
| 09SFB02-83  | 158   | 5.31   | 0.729  | 0.029   | 0.0831   | 0.0027  | 0.87152  | 554   | 17    | 514   | 16  | 718    | 26    | 514.0  | 16.0 | 7.2        | Single Age |
| 09SFB02-84  | 174   | 5.62   | 7.39   | 0.42    | 0.33     | 0.013   | 0.94009  | 2153  | 52    | 1838  | 65  | 2475   | 30    | DISC   | DISC | 25.7       | Single Age |
| 09SFB02-85  | 189   | 2.18   | 0.843  | 0.014   | 0.10233  | 0.0014  | 0.39353  | 620.7 | 7.9   | 628   | 8.5 | 580    | 14    | 628.0  | 8.5  | 1.2        | Single Age |
| 09SFB02-86  | 392.6 | 5.94   | 0.5576 | 0.012   | 0.07174  | 0.0013  | 0.61646  | 449.9 | 7.8   | 446.6 | 8.1 | 468    | 16    | 446.6  | 8.1  | 0.7        | Single Age |
| 09SFB02-87  | 1207  | 5.42   | 0.2565 | 0.012   | 0.03472  | 0.0014  | 0.84654  | 231.7 | 9.6   | 220   | 8.7 | 355    | 19    | 220.0  | 8.7  | 5.0        | Single Age |
| 09SFB02-88  | 778   | 1.965  | 0.5935 | 0.013   | 0.0741   | 0.0016  | 0.73247  | 472.9 | 8.3   | 460.8 | 9.3 | 521    | 19    | 460.8  | 9.3  | 2.6        | Single Age |
| 09SFB02-89  | 336   | 3.52   | 0.657  | 0.02    | 0.083    | 0.0025  | 0.79781  | 513   | 12    | 514   | 15  | 508    | 20    | 514.0  | 15.0 | 0.2        | Single Age |
| 09SFB02-90  | 92.1  | 1.69   | 0.617  | 0.016   | 0.0774   | 0.0015  | 0.49677  | 487.4 | 10    | 480.8 | 9.1 | 526    | 21    | 480.8  | 9.1  | 1.4        | Single Age |
| 09SFB02-91  | 148.7 | 8.59   | 0.6    | 0.014   | 0.0762   | 0.0016  | 0.52599  | 476.9 | 8.8   | 473.5 | 9.4 | 514    | 26    | 473.5  | 9.4  | 0.7        | Single Age |
| 09SFB02-92  | 241.7 | 3.36   | 0.633  | 0.014   | 0.0758   | 0.0019  | 0.34712  | 497.9 | 8.6   | 470.9 | 12  | 618    | 30    | 470.9  | 12.0 | 5.4        | Single Age |
| 09SFB02-93  | 439.3 | 2.34   | 0.0384 | 0.0097  | 0.005773 | 0.0011  | 0.13009  | 38.2  | 9.5   | 37.11 | 6.8 | 214    | 42    | DISC   | DISC | 2.9        | Single Age |
| 09SFB02-94  | 545   | 0.989  | 0.766  | 0.015   | 0.0909   | 0.0018  | 0.70418  | 578.5 | 8.5   | 562   | 11  | 647    | 16    | 562.0  | 11.0 | 2.9        | Single Age |
| 09SFB02-95  | 348   | 4.55   | 0.5302 | 0.012   | 0.06755  | 0.0014  | 0.29682  | 431.8 | 8     | 421.3 | 8.4 | 481    | 24    | 421.3  | 8.4  | 2.4        | Single Age |
| 09SFB02-96  | 236.8 | 5.42   | 0.7401 | 0.013   | 0.08693  | 0.0014  | 0.67875  | 541   | 7.8   | 537.3 | 8.4 | 542    | 12    | 537.3  | 8.4  | 0.7        | Single Age |
| 09SFB02-97  | 291   | 3.65   | 0.3403 | 0.013   | 0.04521  | 0.0014  | 0.74859  | 298   | 10    | 285   | 8.7 | 398    | 25    | 285.0  | 8.7  | 4.4        | Single Age |
| 09SFB02-98  | 244.4 | 2.669  | 0.2603 | 0.011   | 0.03637  | 0.0011  | 0.27076  | 234.8 | 8.7   | 230.3 | 7.1 | 291    | 31    | 230.3  | 7.1  | 1.9        | Single Age |
| 09SFB02-99  | 340   | 1.241  | 0.755  | 0.014   | 0.0923   | 0.0015  | 0.70625  | 571.6 | 8.4   | 570.2 | 8.6 | 593    | 12    | 570.2  | 8.6  | 0.2        | Single Age |
| 09SFB02-100 | 94.6  | 2.73   | 0.3373 | 0.012   | 0.04701  | 0.0012  | -0.11152 | 294.9 | 8.9   | 296.1 | 7.5 | 289    | 27    | 296.1  | 7.5  | 0.4        | Single Age |
| 09SFB02-101 | 120   | 3.193  | 0.785  | 0.025   | 0.0955   | 0.0025  | 0.80825  | 587   | 14    | 588   | 15  | 613    | 20    | 588.0  | 15.0 | 0.2        | Single Age |
| 09SFB02-102 | 197   | 3.173  | 0.341  | 0.011   | 0.04731  | 0.0013  | 0.44639  | 297.8 | 8.7   | 297.9 | 7.8 | 305    | 25    | 297.9  | 7.8  | 0.0        | Single Age |
| 09SFB02-103 | 232   | 2.09   | 0.3087 | 0.01    | 0.04291  | 0.0012  | 0.4503   | 273.5 | 7.8   | 270.8 | 7.7 | 315    | 22    | 270.8  | 7.7  | 1.0        | Single Age |
| 09SFB02-104 | 385   | 2.616  | 0.341  | 0.011   | 0.04716  | 0.0012  | 0.44983  | 297.8 | 8     | 297.1 | 7.5 | 315    | 18    | 297.1  | 7.5  | 0.2        | Single Age |
| 09SFB02-105 | 109.3 | 2.36   | 3.85   | 0.19    | 0.244    | 0.01    | 0.96976  | 1597  | 40    | 1402  | 54  | 1868   | 17    | DISC   | DISC | 24.9       | Single Age |
| 09SFB02-106 | 121.3 | 1.453  | 1.779  | 0.022   | 0.1728   | 0.0025  | 0.69039  | 1037  | 8     | 1028  | 14  | 1056   | 12    | 1056.0 | 12.0 | 2.7        | Single Age |
| 09SFB02-107 | 129.2 | 5.1    | 0.585  | 0.014   | 0.07547  | 0.0013  | 0.35984  | 467   | 9.2   | 469   | 8.1 | 472    | 23    | 469.0  | 8.1  | 0.4        | Single Age |
| 09SFB02-108 | 273   | 1.47   | 0.776  | 0.021   | 0.094    | 0.0022  | 0.82209  | 582   | 12    | 579   | 13  | 599    | 20    | 579.0  | 13.0 | 0          |            |

|             |       |       |        |       |         |        |           |       |     |       |     |       |     |       |      |      |            |
|-------------|-------|-------|--------|-------|---------|--------|-----------|-------|-----|-------|-----|-------|-----|-------|------|------|------------|
| 09SFB02-146 | 233   | 6.43  | 0.5834 | 0.012 | 0.0754  | 0.0015 | 0.61255   | 466.4 | 7.8 | 468.3 | 8.8 | 467   | 16  | 468.3 | 8.8  | 0.4  | Single Age |
| 09SFB02-147 | 14.92 | 13.71 | 0.594  | 0.026 | 0.0732  | 0.0023 | 0.34087   | 471   | 16  | 455   | 14  | 546   | 40  | 455.0 | 14.0 | 3.4  | Single Age |
| 09SFB02-148 | 135   | 4.74  | 4.07   | 0.29  | 0.254   | 0.014  | 0.97748   | 1641  | 60  | 1455  | 73  | 1882  | 35  | DISC  | DISC | 22.7 | Single Age |
| 09SFB02-149 | 503   | 10.6  | 0.753  | 0.057 | 0.0868  | 0.0055 | 0.97504   | 564   | 34  | 535   | 33  | 692   | 30  | 535.0 | 33.0 | 5.1  | Single Age |
| 09SFB02-150 | 186   | 2.61  | 0.349  | 0.026 | 0.0471  | 0.0017 | -0.087061 | 296   | 12  | 296.5 | 11  | 354   | 78  | 296.5 | 11.0 | 0.2  | Single Age |
| 09SFB02-151 | 448   | 1.994 | 0.6279 | 0.013 | 0.0793  | 0.0016 | 0.74185   | 494.5 | 8.4 | 491.9 | 9.8 | 521   | 14  | 491.9 | 9.8  | 0.5  | Single Age |
| 09SFB02-152 | 212.3 | 3.088 | 0.617  | 0.012 | 0.0783  | 0.0016 | 0.37987   | 487.8 | 7.8 | 486   | 9.6 | 507   | 17  | 486.0 | 9.6  | 0.4  | Single Age |
| 09SFB02-153 | 480   | 2.05  | 0.89   | 0.016 | 0.1059  | 0.0016 | 0.6341    | 646   | 8.7 | 649.5 | 9.8 | 653.5 | 9.9 | 649.5 | 9.8  | 0.5  | Single Age |
| 09SFB02-154 | 419.1 | 16.6  | 0.803  | 0.017 | 0.0956  | 0.0018 | 0.82455   | 599.3 | 9.3 | 589.7 | 11  | 637   | 11  | 589.7 | 11.0 | 1.6  | Single Age |
| 09SFB02-155 | 353   | 11.8  | 0.567  | 0.027 | 0.0729  | 0.0032 | 0.94791   | 454   | 18  | 453   | 19  | 485   | 16  | 453.0 | 19.0 | 0.2  | Single Age |
| 09SFB02-156 | 195   | 2.052 | 0.913  | 0.018 | 0.1051  | 0.0017 | 0.62479   | 659   | 9.5 | 644   | 10  | 691   | 22  | 644.0 | 10.0 | 2.3  | Single Age |
| 09SFB02-157 | 843   | 15.5  | 0.3317 | 0.011 | 0.04335 | 0.0012 | 0.47222   | 290.8 | 8.4 | 273.5 | 7.6 | 457   | 23  | 273.5 | 7.6  | 5.9  | Single Age |
| 09SFB02-158 | 363   | 5.14  | 0.763  | 0.015 | 0.0932  | 0.0015 | 0.6018    | 575.9 | 8.6 | 574.5 | 9   | 580   | 17  | 574.5 | 9.0  | 0.2  | Single Age |
| 09SFB02-159 | 203   | 3.51  | 0.824  | 0.015 | 0.0991  | 0.0019 | 0.70846   | 610   | 8.4 | 609.2 | 11  | 624   | 14  | 609.2 | 11.0 | 0.1  | Single Age |
| 09SFB02-160 | 285.3 | 1.58  | 0.891  | 0.018 | 0.1075  | 0.0024 | 0.59848   | 646.6 | 9.6 | 658   | 14  | 601   | 22  | 658.0 | 14.0 | 1.8  | Single Age |
| 09SFB02-161 | 204   | 2.565 | 0.9    | 0.024 | 0.098   | 0.0025 | 0.68075   | 653   | 13  | 603   | 14  | 804   | 22  | 603.0 | 14.0 | 7.7  | Single Age |

| Sample Name:                         |        | 09-SFB-43 |  |                 |          |          |          |           |                    |          |       |          |        |          |          |          |              |              |
|--------------------------------------|--------|-----------|--|-----------------|----------|----------|----------|-----------|--------------------|----------|-------|----------|--------|----------|----------|----------|--------------|--------------|
| Northern Helvetic Flysch (35 ± 3 Ma) |        |           |  | Isotopic Ratios |          |          |          |           | Apparent Ages (Ma) |          |       |          |        |          |          |          |              |              |
| U                                    |        | U/Th      |  | 207Pb           | 2σ error | 206Pb    | 2σ error | Error     | 207Pb              | 2σ error | 206Pb | 2σ error | 207Pb  | 2σ error | Best age | 2σ error | Discordance* | Rim, Core or |
| Grain #                              | (ppm)  |           |  | 235U            | (abs.)   | 238U     | (abs.)   | Corr.     | 235U               | (Ma)     | 238U  | (Ma)     | 206Pb  | (Ma)     | (Ma)     | (Ma)     | %            | Single Age   |
| SFB43_1                              | 394    | 16.8      |  | 0.6249          | 0.0082   | 0.07829  | 0.00097  | 0.43504   | 492.9              | 5.1      | 485.9 | 5.8      | 527    | 29       | 485.9    | 5.8      | 1.4          | Rim          |
| SFB43_1                              | 100    | 5.2       |  | 0.6958          | 0.0094   | 0.08679  | 0.00089  | 0.36384   | 536.1              | 5.6      | 536.5 | 5.3      | 522    | 32       | 536.5    | 5.3      | -0.1         | Core         |
| SFB43_2                              | 394    | 0.62      |  | 0.782           | 0.011    | 0.09477  | 0.00081  | 0.58259   | 588                | 6.5      | 583.7 | 4.7      | 600    | 23       | 583.7    | 4.7      | 0.7          | Single Age   |
| SFB43_3                              | 302.7  | 1.341     |  | 0.03778         | 0.00092  | 0.005668 | 0.00079  | 0.086616  | 37.65              | 0.9      | 36.44 | 0.5      | 102    | 61       | 36.4     | 0.5      | 3.2          | Single Age   |
| SFB43_4                              | 307    | 1.55      |  | 0.8627          | 0.0075   | 0.10231  | 0.00077  | 0.78616   | 631.5              | 4.1      | 627.9 | 4.5      | 645    | 15       | 627.9    | 4.5      | 0.6          | Single Age   |
| SFB43_5                              | 307.3  | 39.3      |  | 0.344           | 0.0073   | 0.04605  | 0.00061  | 0.68776   | 300.2              | 5.5      | 290.2 | 3.7      | 377    | 39       | 290.2    | 3.7      | 3.3          | Single Age   |
| SFB43_6                              | 141.9  | 4.63      |  | 0.5092          | 0.0055   | 0.06647  | 0.00048  | 0.37165   | 417.8              | 3.7      | 414.8 | 2.9      | 429    | 23       | 414.8    | 2.9      | 0.7          | Single Age   |
| SFB43_7                              | 212    | 1.278     |  | 14.08           | 0.13     | 0.5063   | 0.005    | 0.70257   | 2755               | 8.7      | 2641  | 21       | 2838   | 13       | 2838.0   | 13.0     | 6.9          | Single Age   |
| SFB43_8                              | 578    | 0.96      |  | 0.03549         | 0.00058  | 0.005525 | 0.000058 | 0.024664  | 35.4               | 0.57     | 35.52 | 0.37     | 40     | 41       | 35.5     | 0.4      | -0.3         | Single Age   |
| SFB43_9                              | 147    | 2         |  | 0.623           | 0.017    | 0.0785   | 0.0021   | 0.94707   | 491                | 11       | 487   | 12       | 514    | 18       | 487.0    | 12.0     | 0.8          | Single Age   |
| SFB43_10                             | 279.8  | 6.8       |  | 0.6663          | 0.0047   | 0.08158  | 0.00046  | 0.37702   | 518.4              | 2.9      | 505.6 | 2.8      | 582    | 16       | 505.6    | 2.8      | 2.5          | Single Age   |
| SFB43_12                             | 318.6  | 31.2      |  | 0.8747          | 0.0073   | 0.1027   | 0.0011   | 0.46356   | 638.1              | 3.9      | 630.3 | 6.7      | 659    | 22       | 630.3    | 6.7      | 1.2          | Rim          |
| SFB43_12                             | 187    | 2.03      |  | 1.191           | 0.024    | 0.1311   | 0.0022   | 0.80127   | 798                | 11       | 794   | 13       | 808    | 25       | 794.0    | 13.0     | 0.5          | Core         |
| SFB43_13                             | 750    | 3.11      |  | 0.3134          | 0.0019   | 0.04347  | 0.00028  | 0.59045   | 276.8              | 1.5      | 274.3 | 1.8      | 300    | 13       | 274.3    | 1.8      | 0.9          | Single Age   |
| SFB43_14                             | 669    | 0.901     |  | 0.7659          | 0.0082   | 0.0906   | 0.0011   | 0.84397   | 577.3              | 4.7      | 559   | 6.6      | 656    | 15       | 559.0    | 6.6      | 3.2          | Single Age   |
| SFB43_15                             | 409    | 30.8      |  | 0.5461          | 0.004    | 0.06942  | 0.00039  | 0.52032   | 442.4              | 2.6      | 432.7 | 2.4      | 494    | 15       | 432.7    | 2.4      | 2.2          | Single Age   |
| SFB43_16                             | 320    | 2.83      |  | 0.668           | 0.018    | 0.0813   | 0.0017   | 0.91721   | 519                | 11       | 504   | 10       | 581    | 25       | 504.0    | 10.0     | 2.9          | Single Age   |
| SFB43_17                             | 161.2  | 0.98      |  | 0.8024          | 0.0089   | 0.0969   | 0.001    | 0.53507   | 598.1              | 5        | 596   | 6        | 601    | 25       | 596.0    | 6.0      | 0.4          | Single Age   |
| SFB43_18                             | 453    | 64        |  | 0.4362          | 0.0073   | 0.05775  | 0.0007   | 0.87443   | 367.4              | 5.2      | 361.9 | 4.3      | 392    | 17       | 361.9    | 4.3      | 1.5          | Single Age   |
| SFB43_19                             | 124.2  | 0.36      |  | 0.7143          | 0.0062   | 0.08701  | 0.00065  | 0.54308   | 547.7              | 3.8      | 537.8 | 3.8      | 582    | 20       | 537.8    | 3.8      | 1.8          | Single Age   |
| SFB43_20                             | 373    | 9.04      |  | 0.588           | 0.012    | 0.07497  | 0.00082  | 0.84779   | 469.1              | 7.4      | 466   | 4.9      | 512    | 34       | 466.0    | 4.9      | 0.7          | Single Age   |
| SFB43_21                             | 43.3   | 0.979     |  | 0.821           | 0.015    | 0.0983   | 0.0011   | 0.55256   | 608.3              | 8.5      | 604.3 | 6.6      | 626    | 34       | 604.3    | 6.6      | 0.7          | Single Age   |
| SFB43_22                             | 70.7   | 1.378     |  | 1.705           | 0.027    | 0.1646   | 0.0027   | 0.62874   | 1010               | 10       | 982   | 15       | 1083   | 28       | 1083.0   | 28.0     | 9.3          | Single Age   |
| SFB43_23                             | 23.2   | 0.307     |  | 0.769           | 0.015    | 0.0958   | 0.0015   | 0.3013    | 578.6              | 8.5      | 589.8 | 8.8      | 533    | 43       | 589.8    | 8.8      | -1.9         | Single Age   |
| SFB43_24                             | 218.1  | 1.32      |  | 6.093           | 0.056    | 0.3542   | 0.0033   | 0.81748   | 1989               | 8        | 1954  | 16       | 2025   | 13       | 2025.0   | 13.0     | 3.5          | Single Age   |
| SFB43_25                             | 1306   | 78.1      |  | 0.3588          | 0.0028   | 0.04897  | 0.00036  | 0.80855   | 311.3              | 2.1      | 308.2 | 2.2      | 340    | 10       | 308.2    | 2.2      | 1.0          | Single Age   |
| SFB43_26                             | 215    | 1.1       |  | 0.891           | 0.025    | 0.1028   | 0.0013   | 0.22383   | 646                | 13       | 630.6 | 7.5      | 662    | 39       | 630.6    | 7.5      | 2.4          | Single Age   |
| SFB43_27                             | 231.3  | 1.89      |  | 0.7802          | 0.005    | 0.0941   | 0.00064  | 0.41744   | 585.5              | 2.9      | 579.7 | 3.8      | 608    | 15       | 579.7    | 3.8      | 1.0          | Single Age   |
| SFB43_28                             | 613    | 4.18      |  | 0.3154          | 0.003    | 0.04328  | 0.00038  | 0.66283   | 278.3              | 2.3      | 273.1 | 2.3      | 325    | 18       | 273.1    | 2.3      | 1.9          | Single Age   |
| SFB43_29                             | 163    | 1.227     |  | 0.7063          | 0.0066   | 0.0842   | 0.00069  | 0.33145   | 542.4              | 3.9      | 521.1 | 4.1      | 613    | 18       | 521.1    | 4.1      | 3.9          | Single Age   |
| SFB43_30                             | 248.9  | 1.488     |  | 0.0392          | 0.0016   | 0.005561 | 0.000098 | 0.42855   | 39                 | 1.6      | 35.75 | 0.63     | 254    | 90       | 35.8     | 0.6      | 8.3          | Single Age   |
| SFB43_31                             | 464    | 4.88      |  | 0.3153          | 0.0028   | 0.04374  | 0.00031  | 0.62992   | 278.2              | 2.2      | 276   | 1.9      | 291    | 16       | 276.0    | 1.9      | 0.8          | Single Age   |
| SFB43_32                             | 175.5  | 2.652     |  | 0.6038          | 0.005    | 0.077    | 0.00061  | 0.69534   | 479.6              | 3.2      | 478.2 | 3.7      | 476    | 15       | 478.2    | 3.7      | 0.3          | Single Age   |
| SFB43_33                             | 186    | 1.346     |  | 0.0372          | 0.0018   | 0.005076 | 0.00014  | -0.01487  | 37.1               | 1.7      | 37.02 | 0.92     | 56     | 92       | 37.0     | 0.9      | 0.2          | Rim          |
| SFB43_33                             | 92.4   | 0.491     |  | 5.092           | 0.058    | 0.3204   | 0.0031   | 0.8073    | 1836               | 9.2      | 1791  | 15       | 1876   | 12       | 1876.0   | 12.0     | 4.5          | Core         |
| SFB43_34                             | 1068   | 70        |  | 1.123           | 0.17     | 0.1161   | 0.0081   | 0.99466   | 809                | 79       | 707   | 47       | 1070   | 150      | DISC     | DISC     | 12.6         | Single Age   |
| SFB43_35                             | 314    | 1.258     |  | 0.8434          | 0.0057   | 0.10032  | 0.00073  | 0.47426   | 621                | 3.2      | 616.2 | 4.3      | 627    | 17       | 616.2    | 4.3      | 0.8          | Single Age   |
| SFB43_36                             | 249    | 5.13      |  | 0.5749          | 0.0083   | 0.07431  | 0.00099  | 0.82216   | 460.9              | 5.3      | 462   | 5.9      | 444    | 18       | 462.0    | 5.9      | -0.2         | Single Age   |
| SFB43_37                             | 204    | 0.903     |  | 0.7815          | 0.0081   | 0.09433  | 0.00058  | 0.47586   | 586.2              | 4.6      | 581.1 | 3.4      | 598    | 19       | 581.1    | 3.4      | 0.9          | Single Age   |
| SFB43_38                             | 388    | 1.821     |  | 0.3366          | 0.003    | 0.04687  | 0.00038  | 0.25411   | 294.5              | 2.2      | 295.3 | 2.4      | 284    | 18       | 295.3    | 2.4      | -0.3         | Single Age   |
| SFB43_39                             | 42.1   | 1.68      |  | 6.012           | 0.079    | 0.3396   | 0.0046   | 0.60827   | 1977               | 11       | 1884  | 22       | 2067   | 19       | 2067.0   | 19.0     | 8.9          | Single Age   |
| SFB43_40                             | 340    | 8.9       |  | 0.6277          | 0.0072   | 0.08038  | 0.00082  | 0.64086   | 494.6              | 4.5      | 498.4 | 4.9      | 481    | 20       | 498.4    | 4.9      | -0.8         | Single Age   |
| SFB43_41                             | 103.43 | 0.845     |  | 0.836           | 0.014    | 0.0986   | 0.0011   | 0.57681   | 617                | 7.5      | 606.2 | 6.5      | 641    | 23       | 606.2    | 6.5      | 1.8          | Single Age   |
| SFB43_42                             | 57.89  | 1.166     |  | 1.533           | 0.015    | 0.1546   | 0.0015   | 0.44731   | 943.7              | 5.9      | 926.8 | 8.3      | 981    | 19       | 981.0    | 19.0     | 5.5          | Single Age   |
| SFB43_43                             | 777    | 13.56     |  | 0.5325          | 0.0057   | 0.06805  | 0.00076  | 0.76875   | 433.9              | 3.8      | 424.4 | 4.6      | 474    | 14       | 424.4    | 4.6      | 2.2          | Single Age   |
| SFB43_44                             | 550    | 1.11      |  | 0.742           | 0.035    | 0.08719  | 0.00087  | 0.43129   | 555                | 14       | 538.9 | 5.2      | 631    | 52       | 538.9    | 5.2      | 2.9          | Single Age   |
| SFB43_45                             | 322    | 2.78      |  | 0.6074          | 0.0064   | 0.07666  | 0.00089  | 0.73301   | 481.9              | 4        | 476.1 | 5.4      | 486    | 24       | 476.1    | 5.4      | 1.2          | Single Age   |
| SFB43_46                             | 494    | 107       |  | 0.469           | 0.04     | 0.0617   | 0.0043   | 0.93809   | 390                | 28       | 386   | 26       | 451    | 72       | 386.0    | 26.0     | 1.0          | Rim          |
| SFB43_46                             | 74.8   | 1.125     |  | 12.62           | 0.15     | 0.4822   | 0.0059   | 0.77068   | 2654               | 11       | 2536  | 26       | 2739   | 15       | 2739.0   | 15.0     | 7.4          | Core         |
| SFB43_47                             | 52.3   | 1.068     |  | 11.649          | 0.075    | 0.4747   | 0.0038   | 0.74071   | 2576               | 6        | 2504  | 17       | 2631   | 9.5      | 2631.0   | 9.5      | 4.8          | Single Age   |
| SFB43_48                             | 121    | 1.46      |  | 6.504           | 0.049    | 0.3568   | 0.0027   | 0.82879   | 2046               | 6.6      | 1967  | 13       | 2118.3 | 9.5      | 2118.3   | 9.5      | 7.1          | Single Age   |
| SFB43_49                             | 434    | 1.24      |  | 0.03604         | 0.00094  | 0.00559  | 0.000092 | -0.050508 | 35.95              | 0.92     | 35.94 | 0.59     | 35     | 65       | 35.9     | 0.6      | 0.0          | Single Age   |
| SFB43_50                             | 246    | 3.38      |  | 0.63            | 0.01     | 0.08079  | 0.00087  | 0.27458   | 495.9              | 6.5      | 500.8 | 5.2      | 483    | 24       | 500.8    | 5.2      | -1.0         | Single Age   |
| SFB43_51                             | 420    | 6.9       |  | 0.5582          | 0.0044   | 0.07257  | 0.00056  | 0.36133   | 450.2              | 2.8      | 451.6 | 3.4      | 449    | 20       | 451.6    | 3.4      | -0.3         | Single Age   |
| SFB43_52                             | 334    | 1.32      |  | 0.03437         | 0.00083  | 0.005418 | 0.000065 | 0.23831   | 34.3               | 0.82     | 34.83 | 0.42     | 32     | 51       | 34.8     | 0.4      | -1.5         | Single Age   |
| SFB43_53                             | 212.8  | 1.353     |  | 0.037           | 0.0014   | 0.005668 | 0.00008  | -0.006475 | 36.9               | 1.3      | 36.43 | 0.51     | 89     | 80       | 36.4     | 0.5      | 1.3          | Single Age   |
| SFB43_54                             | 98     | 1.488     |  | 0.6005          | 0.0071   | 0.07673  | 0.00082  | 0.39308   | 477.4              | 4.5      | 476.5 | 4.9      | 481    | 26       | 476.5    | 4.9      | 0.2          | Single Age   |
| SFB43_55                             | 206    | 1.25      |  | 0.6395          | 0.       |          |          |           |                    |          |       |          |        |          |          |          |              |              |

|           |       |       |         |         |          |          |          |       |      |       |      |        |     |        |      |      |            |
|-----------|-------|-------|---------|---------|----------|----------|----------|-------|------|-------|------|--------|-----|--------|------|------|------------|
| SFB43_84  | 214   | 1.634 | 0.951   | 0.012   | 0.1028   | 0.0013   | 0.015153 | 678.4 | 6.3  | 630.8 | 7.4  | 817    | 30  | 630.8  | 7.4  | 7.0  | Core       |
| SFB43_86  | 1220  | 15    | 0.5567  | 0.0038  | 0.0712   | 0.00048  | 0.61004  | 449.4 | 2.5  | 443.4 | 2.9  | 483    | 14  | 443.4  | 2.9  | 1.3  | Single Age |
| SFB43_87  | 999   | 59    | 0.419   | 0.011   | 0.0554   | 0.0016   | 0.7895   | 355.3 | 7.6  | 347.5 | 9.7  | 380    | 34  | 347.5  | 9.7  | 2.2  | Rim        |
| SFB43_87  | 100.3 | 1.487 | 0.7588  | 0.0085  | 0.09191  | 0.00087  | 0.44596  | 573.2 | 4.9  | 566.8 | 5.1  | 589    | 23  | 566.8  | 5.1  | 1.1  | Core       |
| SFB43_88  | 46.2  | 1.184 | 1.312   | 0.014   | 0.1414   | 0.0012   | 0.313    | 850.9 | 6.1  | 852.3 | 6.7  | 849    | 24  | 849.0  | 6.7  | -0.2 | Single Age |
| SFB43_89  | 855   | 3.376 | 0.3496  | 0.0022  | 0.04851  | 0.00032  | 0.54908  | 304.6 | 1.7  | 305.3 | 2    | 310    | 15  | 305.3  | 2.0  | -0.2 | Single Age |
| SFB43_90  | 288   | 3.52  | 0.5769  | 0.0055  | 0.07386  | 0.00064  | 0.58386  | 462.4 | 3.6  | 459.3 | 3.8  | 482    | 18  | 459.3  | 3.8  | 0.7  | Single Age |
| SFB43_91  | 1127  | 2.11  | 0.3253  | 0.0035  | 0.04494  | 0.00038  | 0.64573  | 285.9 | 2.7  | 283.8 | 2.2  | 311    | 22  | 283.8  | 2.2  | 0.7  | Single Age |
| SFB43_93  | 285.2 | 1.842 | 0.864   | 0.03    | 0.0963   | 0.0016   | 0.81875  | 631   | 16   | 592.7 | 9.3  | 772    | 50  | 592.7  | 9.3  | 6.1  | Single Age |
| SFB43_94  | 799   | 2.98  | 0.4579  | 0.0059  | 0.06031  | 0.00079  | 0.81717  | 382.7 | 4.1  | 377.5 | 4.8  | 414    | 19  | 377.5  | 4.8  | 1.4  | Single Age |
| SFB43_95  | 598   | 1.984 | 0.5355  | 0.007   | 0.06835  | 0.00095  | 0.83224  | 435.3 | 4.6  | 426.2 | 5.7  | 494    | 17  | 426.2  | 5.7  | 2.1  | Single Age |
| SFB43_96  | 129   | 1.292 | 0.862   | 0.01    | 0.1027   | 0.001    | 0.53759  | 631   | 5.5  | 630.1 | 6.1  | 639    | 24  | 630.1  | 6.1  | 0.1  | Single Age |
| SFB43_97  | 99    | 1.294 | 0.6976  | 0.008   | 0.08708  | 0.00092  | 0.55647  | 537.2 | 4.8  | 538.2 | 5.5  | 530    | 22  | 538.2  | 5.5  | -0.2 | Single Age |
| SFB43_98  | 674   | 47    | 0.4282  | 0.0086  | 0.0575   | 0.001    | 0.86467  | 361.8 | 6.1  | 360.7 | 6.2  | 382    | 24  | 360.7  | 6.2  | 0.3  | Rim        |
| SFB43_98  | 84.2  | 1.136 | 1.046   | 0.012   | 0.1201   | 0.0011   | 0.041204 | 727.7 | 5.6  | 731.4 | 6.2  | 728    | 27  | 731.4  | 6.2  | -0.5 | Core       |
| SFB43_99  | 159   | 1.125 | 0.7997  | 0.0083  | 0.09682  | 0.00071  | 0.22942  | 596.5 | 4.7  | 595.7 | 4.1  | 612    | 25  | 595.7  | 4.1  | 0.1  | Single Age |
| SFB43_100 | 135   | 0.96  | 0.733   | 0.011   | 0.0896   | 0.0011   | 0.47869  | 558.6 | 6.1  | 553.1 | 6.4  | 580    | 27  | 553.1  | 6.4  | 1.0  | Single Age |
| SFB43_101 | 743   | 3.214 | 0.3427  | 0.0022  | 0.0475   | 0.00025  | 0.65255  | 299.2 | 1.6  | 299.1 | 1.6  | 297    | 12  | 299.1  | 1.6  | 0.0  | Single Age |
| SFB43_102 | 260   | 1.257 | 0.03734 | 0.00098 | 0.005762 | 0.000088 | 0.025078 | 37.21 | 0.96 | 37.04 | 0.56 | 30     | 58  | 37.0   | 0.6  | 0.5  | Single Age |
| SFB43_104 | 381   | 1.893 | 4.018   | 0.042   | 0.2389   | 0.0029   | 0.82999  | 1638  | 8.6  | 1381  | 15   | 1965   | 11  | DISC   | DISC | 29.7 | Single Age |
| SFB43_105 | 451   | 6.3   | 0.9414  | 0.008   | 0.10923  | 0.00089  | 0.72961  | 673.5 | 4.2  | 668.3 | 5.2  | 682    | 13  | 668.3  | 5.2  | 0.8  | Single Age |
| SFB43_106 | 293   | 2.13  | 1.792   | 0.02    | 0.1721   | 0.0024   | 0.41602  | 1043  | 7.2  | 1023  | 13   | 1063   | 27  | 1063.0 | 27.0 | 3.8  | Single Age |
| SFB43_107 | 59.7  | 1.148 | 1.379   | 0.048   | 0.1339   | 0.0018   | 0.60445  | 879   | 20   | 810   | 10   | 1070   | 53  | 810.0  | 10.0 | 7.8  | Single Age |
| SFB43_108 | 272   | 2.16  | 6.696   | 0.07    | 0.3623   | 0.0038   | 0.88364  | 2072  | 9.2  | 1993  | 18   | 2148.8 | 8.8 | 2148.8 | 8.8  | 7.3  | Single Age |
| SFB43_109 | 279   | 47.8  | 0.852   | 0.015   | 0.0998   | 0.0013   | 0.81716  | 625.5 | 8    | 613   | 7.7  | 668    | 24  | 613.0  | 7.7  | 2.0  | Single Age |
| SFB43_110 | 231   | 1.647 | 0.8112  | 0.006   | 0.07771  | 0.00063  | 0.39774  | 484.2 | 3.8  | 482.4 | 3.8  | 477    | 20  | 482.4  | 3.8  | 0.4  | Single Age |
| SFB43_111 | 194   | 1.829 | 0.6206  | 0.0096  | 0.0749   | 0.00051  | 0.54906  | 489.9 | 6    | 465.6 | 3.1  | 607    | 29  | 465.6  | 3.1  | 5.0  | Single Age |
| SFB43_112 | 370   | 4.18  | 0.5558  | 0.0076  | 0.07037  | 0.00088  | 0.86666  | 448.7 | 4.9  | 438.4 | 5.3  | 497    | 16  | 438.4  | 5.3  | 2.3  | Single Age |
| SFB43_113 | 246   | 35.6  | 0.8289  | 0.0075  | 0.09964  | 0.00082  | 0.36234  | 612.9 | 4.2  | 612.3 | 4.8  | 607    | 22  | 612.3  | 4.8  | 0.1  | Single Age |
| SFB43_114 | 252   | 3.556 | 0.7405  | 0.0066  | 0.08983  | 0.00079  | 0.51696  | 562.6 | 3.9  | 554.5 | 4.6  | 579    | 17  | 554.5  | 4.6  | 1.4  | Single Age |
| SFB43_115 | 363.1 | 0.739 | 0.777   | 0.019   | 0.0895   | 0.0011   | 0.5054   | 583   | 11   | 552.5 | 6.2  | 682    | 33  | 552.5  | 6.2  | 5.2  | Single Age |
| SFB43_116 | 337   | 5.05  | 0.57    | 0.0046  | 0.07303  | 0.00049  | 0.17262  | 458   | 3    | 454.4 | 2.9  | 462    | 19  | 454.4  | 2.9  | 0.8  | Single Age |
| SFB43_117 | 289   | 1.963 | 0.9006  | 0.0093  | 0.1053   | 0.0012   | 0.71623  | 651.9 | 5    | 645.3 | 6.9  | 660    | 20  | 645.3  | 6.9  | 1.0  | Single Age |
| SFB43_118 | 341   | 2.15  | 0.3352  | 0.0064  | 0.04506  | 0.00058  | 0.24526  | 293.5 | 4.9  | 284.1 | 3.6  | 351    | 32  | 284.1  | 3.6  | 3.2  | Rim        |
| SFB43_118 | 189.5 | 1.169 | 1.052   | 0.019   | 0.1163   | 0.0016   | 0.79042  | 729.6 | 9.3  | 709.3 | 9.1  | 795    | 22  | 709.3  | 9.1  | 2.8  | Core       |
| SFB43_119 | 385   | 1.973 | 0.7909  | 0.0096  | 0.0947   | 0.00077  | 0.091927 | 591.5 | 5.4  | 583.2 | 4.6  | 609    | 24  | 583.2  | 4.6  | 1.4  | Single Age |
| SFB43_120 | 497   | 9.1   | 0.5808  | 0.0042  | 0.07453  | 0.00051  | 0.37288  | 464.9 | 2.7  | 463.4 | 3.1  | 468    | 16  | 463.4  | 3.1  | 0.3  | Single Age |

# Thun Section

| Sample Name:                             |       | OA-13-SFB03     |  |        |        |         |          |                    |          |       |       |          |       |          |       |          |          |          |              |              |  |
|------------------------------------------|-------|-----------------|--|--------|--------|---------|----------|--------------------|----------|-------|-------|----------|-------|----------|-------|----------|----------|----------|--------------|--------------|--|
| Lower Freshwater Molasse I (27 ± 0.5 Ma) |       | Isotopic Ratios |  |        |        |         |          | Apparent Ages (Ma) |          |       |       |          |       |          |       |          |          |          |              |              |  |
|                                          |       | U               |  | U/Th   |        | 207Pb   | 2σ error | 206Pb              | 2σ error | Error | 207Pb | 2σ error | 206Pb | 2σ error | 207Pb | 2σ error | Best age | 2σ error | Discordance* | Rim, Core or |  |
| Grain #                                  | (ppm) |                 |  | 235U   | (abs.) | 238U    | (abs.)   | Corr.              | 235U     | (Ma)  | 238U  | (Ma)     | 206Pb | (Ma)     | 206Pb | (Ma)     | (Ma)     | (Ma)     | %            | Single Age   |  |
| SFB03_1                                  | 175   | 1.77            |  | 0.781  | 0.013  | 0.0933  | 0.0013   | 0.29388            | 586.7    | 7.5   | 574.8 | 7.4      | 628   | 40       | 574.8 | 7.4      | 2.0      |          | Single Age   |              |  |
| SFB03_2                                  | 286   | 5.1             |  | 5.51   | 0.069  | 0.3311  | 0.0042   | 0.78121            | 1904     | 12    | 1843  | 20       | 1983  | 19       | 1983  | 19       | 7.1      |          | Single Age   |              |  |
| SFB03_3                                  | 207   | 7.12            |  | 0.701  | 0.012  | 0.0856  | 0.001    | 0.29297            | 539.6    | 7.3   | 529.6 | 6        | 560   | 36       | 529.6 | 6        | 1.9      |          | Single Age   |              |  |
| SFB03_4                                  | 290   | 131.9           |  | 0.3703 | 0.0061 | 0.05239 | 0.00057  | 0.15374            | 319.7    | 4.5   | 329.2 | 3.5      | 269   | 40       | 329.2 | 3.5      | 3.0      |          | Single Age   |              |  |
| SFB03_5                                  | 331   | 1.3             |  | 0.749  | 0.01   | 0.0916  | 0.001    | 0.38519            | 569.3    | 5.5   | 565.1 | 6.2      | 571   | 30       | 565.1 | 6.2      | 0.7      |          | Single Age   |              |  |
| SFB03_6                                  | 207   | 0.709           |  | 1.718  | 0.036  | 0.1717  | 0.003    | 0.61942            | 1016     | 13    | 1021  | 16       | 1031  | 36       | 1031  | 36       | 1.0      |          | Single Age   |              |  |
| SFB03_7                                  | 85.6  | 0.8029          |  | 24.12  | 0.24   | 0.6511  | 0.0085   | 0.66767            | 3274.2   | 9.4   | 3237  | 34       | 3304  | 15       | 3304  | 15       | 2.0      |          | Single Age   |              |  |
| SFB03_8                                  | 666   | 1.531           |  | 0.4013 | 0.0098 | 0.0498  | 0.0015   | 0.75263            | 342.3    | 7.1   | 313.4 | 9.1      | 531   | 41       | 313.4 | 9.1      | 8.4      |          | Single Age   |              |  |
| SFB03_9                                  | 132.7 | 1.633           |  | 0.32   | 0.01   | 0.04363 | 0.00086  | 0.45165            | 281.2    | 7.8   | 275.2 | 5.3      | 306   | 61       | 275.2 | 5.3      | 2.1      |          | Single Age   |              |  |
| SFB03_10                                 | 663   | 95              |  | 0.365  | 0.027  | 0.0489  | 0.0028   | 0.66477            | 316      | 20    | 308   | 17       | 380   | 120      | 308   | 17       | 2.5      |          | Rim          |              |  |
| SFB03_10                                 | 325   | 7.31            |  | 0.5217 | 0.0093 | 0.0682  | 0.0011   | 0.4951             | 428.9    | 6     | 425   | 6.9      | 443   | 41       | 425   | 6.9      | 0.9      |          | Core         |              |  |
| SFB03_11                                 | 49.1  | 2.131           |  | 0.287  | 0.014  | 0.0379  | 0.0012   | 0.21016            | 255      | 11    | 239.6 | 7.5      | 430   | 120      | 239.6 | 7.5      | 6.0      |          | Single Age   |              |  |
| SFB03_12                                 | 111.9 | 0.824           |  | 0.684  | 0.023  | 0.0841  | 0.0015   | 0.29133            | 529      | 14    | 520.4 | 9        | 560   | 66       | 520.4 | 9        | 1.6      |          | Single Age   |              |  |
| SFB03_13                                 | 187   | 1.152           |  | 0.56   | 0.016  | 0.0721  | 0.0019   | 0.63396            | 451      | 10    | 449   | 11       | 461   | 55       | 449   | 11       | 0.4      |          | Single Age   |              |  |
| SFB03_14                                 | 128   | 0.614           |  | 0.888  | 0.016  | 0.1022  | 0.0015   | 0.33092            | 644.7    | 8.6   | 627   | 8.7      | 718   | 43       | 627   | 8.7      | 2.7      |          | Single Age   |              |  |
| SFB03_15                                 | 631   | 18              |  | 0.517  | 0.018  | 0.0681  | 0.0018   | 0.51381            | 423      | 12    | 425   | 11       | 417   | 71       | 425   | 11       | 0.5      |          | Rim          |              |  |
| SFB03_15                                 | 237   | 6.11            |  | 0.593  | 0.015  | 0.0766  | 0.0012   | 0.28562            | 472.5    | 9.7   | 475.9 | 7.2      | 474   | 63       | 475.9 | 7.2      | 0.7      |          | Core         |              |  |
| SFB03_16                                 | 164   | 1.366           |  | 0.35   | 0.012  | 0.04722 | 0.00086  | 0.11813            | 305      | 8.6   | 297.4 | 5.3      | 368   | 76       | 297.4 | 5.3      | 2.5      |          | Single Age   |              |  |
| SFB03_17                                 | 85.3  | 0.853           |  | 0.774  | 0.017  | 0.0949  | 0.0014   | 0.11872            | 581.2    | 9.8   | 586.7 | 8.1      | 582   | 49       | 586.7 | 8.1      | 0.9      |          | Single Age   |              |  |
| SFB03_19                                 | 134.4 | 1.013           |  | 4.32   | 0.085  | 0.2723  | 0.0054   | 0.43226            | 1701     | 15    | 1552  | 28       | 1892  | 42       | 1892  | 42       | 18.0     |          | Single Age   |              |  |
| SFB03_20                                 | 84    | 0.925           |  | 5.61   | 0.18   | 0.316   | 0.011    | 0.72092            | 1914     | 27    | 1767  | 55       | 2055  | 48       | 2055  | 48       | 14.0     |          | Single Age   |              |  |
| SFB03_21                                 | 598   | 3.444           |  | 0.3281 | 0.0058 | 0.04572 | 0.00068  | 0.57836            | 288.5    | 4.6   | 288.1 | 4.2      | 304   | 36       | 288.1 | 4.2      | 0.1      |          | Single Age   |              |  |
| SFB03_22                                 | 216   | 20.2            |  | 0.444  | 0.02   | 0.0546  | 0.0021   | 0.3526             | 373      | 14    | 343   | 13       | 520   | 130      | 343   | 13       | 8.0      |          | Single Age   |              |  |
| SFB03_23                                 | 348   | 12.8            |  | 0.53   | 0.057  | 0.0662  | 0.0016   | 0.34497            | 431      | 37    | 413.1 | 9.6      | 520   | 260      | 413.1 | 9.6      | 4.2      |          | Rim          |              |  |
| SFB03_23                                 | 230   | 1.974           |  | 0.745  | 0.015  | 0.0909  | 0.002    | 0.30397            | 565.2    | 8.7   | 561   | 12       | 601   | 58       | 561   | 12       | 0.7      |          | Core         |              |  |
| SFB03_25                                 | 732   | 2.76            |  | 0.3191 | 0.0067 | 0.04455 | 0.00077  | 0.57481            | 281.1    | 5.1   | 280.9 | 4.7      | 288   | 42       | 280.9 | 4.7      | 0.1      |          | Single Age   |              |  |
| SFB03_26                                 | 17.95 | 1.172           |  | 2.88   | 0.44   | 0.1612  | 0.0079   | 0.66656            | 1370     | 120   | 963   | 44       | 2050  | 190      | DISC  | DISC     | 53.0     |          | Single Age   |              |  |
| SFB03_27                                 | 921   | 126             |  | 0.408  | 0.011  | 0.0567  | 0.0012   | 0.48129            | 346.9    | 8     | 355.3 | 7.1      | 335   | 46       | 355.3 | 7.1      | 2.4      |          | Rim          |              |  |
| SFB03_27                                 | 203.4 | 1.026           |  | 0.693  | 0.021  | 0.0852  | 0.003    | 0.47303            | 534      | 13    | 527   | 18       | 537   | 65       | 527   | 18       | 1.3      |          | Core         |              |  |
| SFB03_28                                 | 616   | 5.8             |  | 0.3849 | 0.0086 | 0.04967 | 0.0006   | 0.41076            | 330.6    | 6.3   | 312.5 | 3.7      | 456   | 53       | 312.5 | 3.7      | 5.5      |          | Rim          |              |  |
| SFB03_28                                 | 271.2 | 3               |  | 0.511  | 0.016  | 0.0688  | 0.0022   | 0.6732             | 419      | 11    | 429   | 13       | 337   | 58       | 429   | 13       | 2.4      |          | Core         |              |  |
| SFB03_29                                 | 107.9 | 4.56            |  | 0.338  | 0.011  | 0.0472  | 0.0013   | 0.18209            | 295      | 8.2   | 297.2 | 8.2      | 313   | 80       | 297.2 | 8.2      | 0.7      |          | Single Age   |              |  |
| SFB03_31                                 | 104.4 | 1.843           |  | 5.4    | 0.13   | 0.3063  | 0.0073   | 0.79093            | 1893     | 20    | 1728  | 38       | 2074  | 33       | 2074  | 33       | 16.7     |          | Single Age   |              |  |
| SFB03_32                                 | 600   | 1.462           |  | 0.3805 | 0.0065 | 0.05129 | 0.00078  | 0.47048            | 327.3    | 4.7   | 322.4 | 4.8      | 379   | 37       | 322.4 | 4.8      | 1.5      |          | Single Age   |              |  |
| SFB03_33                                 | 239   | 0.93            |  | 0.707  | 0.027  | 0.0824  | 0.0028   | 0.67598            | 542      | 16    | 510   | 17       | 707   | 59       | 510   | 17       | 5.9      |          | Single Age   |              |  |
| SFB03_34                                 | 538   | 30.2            |  | 0.552  | 0.028  | 0.062   | 0.0017   | 0.60919            | 446      | 19    | 388   | 10       | 742   | 90       | DISC  | DISC     | 13.0     |          | Single Age   |              |  |
| SFB03_35                                 | 684   | 3.198           |  | 0.3276 | 0.0065 | 0.04365 | 0.00092  | 0.55588            | 287.6    | 4.9   | 275.4 | 5.7      | 392   | 45       | 275.4 | 5.7      | 4.2      |          | Single Age   |              |  |
| SFB03_36                                 | 203.7 | 10.31           |  | 0.3824 | 0.0072 | 0.05234 | 0.00091  | 0.10035            | 328.6    | 5.3   | 328.8 | 5.6      | 332   | 54       | 328.8 | 5.6      | 0.1      |          | Single Age   |              |  |
| SFB03_37                                 | 439   | 3.284           |  | 0.3446 | 0.0063 | 0.0465  | 0.001    | 0.41663            | 300.5    | 4.8   | 292.6 | 6.2      | 398   | 50       | 292.6 | 6.2      | 2.6      |          | Single Age   |              |  |
| SFB03_38                                 | 247   | 4.8             |  | 0.469  | 0.016  | 0.061   | 0.0023   | 0.48072            | 390      | 11    | 381   | 14       | 491   | 76       | 381   | 14       | 2.3      |          | Single Age   |              |  |
| SFB03_39                                 | 231   | 2.86            |  | 0.5685 | 0.0098 | 0.074   | 0.0012   | 0.40187            | 457.6    | 6.2   | 460   | 7.1      | 451   | 42       | 460   | 7.1      | 0.5      |          | Single Age   |              |  |
| SFB03_40                                 | 866   | 1.95            |  | 0.369  | 0.011  | 0.0467  | 0.0012   | 0.63472            | 318.5    | 8.2   | 294   | 7.4      | 511   | 48       | 294   | 7.4      | 7.7      |          | Single Age   |              |  |
| SFB03_41                                 | 463   | 1.5             |  | 0.73   | 0.012  | 0.0897  | 0.0018   | 0.58891            | 556.2    | 6.8   | 553   | 10       | 612   | 35       | 553   | 10       | 0.6      |          | Single Age   |              |  |
| SFB03_42                                 | 76    | 2.25            |  | 0.545  | 0.027  | 0.0686  | 0.0017   | 0.61515            | 440      | 18    | 428   | 10       | 516   | 80       | 428   | 10       | 2.7      |          | Single Age   |              |  |
| SFB03_43                                 | 193   | 2.81            |  | 0.925  | 0.039  | 0.1062  | 0.0045   | 0.35486            | 664      | 21    | 651   | 26       | 760   | 110      | 651   | 26       | 2.0      |          | Single Age   |              |  |
| SFB03_44                                 | 79    | 2.76            |  | 0.691  | 0.022  | 0.0823  | 0.0021   | 0.23015            | 533      | 13    | 510   | 13       | 711   | 87       | 510   | 13       | 4.3      |          | Single Age   |              |  |
| SFB03_45                                 | 276   | 2.857           |  | 0.336  | 0.019  | 0.0428  | 0.0025   | 0.59526            | 293      | 14    | 270   | 15       | 580   | 110      | 270   | 15       | 7.8      |          | Single Age   |              |  |
| SFB03_46                                 | 29.5  | 2.03            |  | 0.423  | 0.038  | 0.0511  | 0.0029   | 0.31689            | 356      | 27    | 325   | 17       | 630   | 200      | 325   | 17       | 8.7      |          | Single Age   |              |  |
| SFB03_47                                 | 650   | 3.01            |  | 0.386  | 0.011  | 0.0513  | 0.0019   | 0.48247            | 332.9    | 8.3   | 322   | 12       | 367   | 80       | 322   | 12       | 3.3      |          | Single Age   |              |  |
| SFB03_48                                 | 161.4 | 4.33            |  | 0.383  | 0.017  | 0.0502  | 0.0024   | 0.43116            | 329      | 13    | 316   | 15       | 500   | 100      | 316   | 15       | 4.0      |          | Single Age   |              |  |
| SFB03_50                                 | 239   | 7.69            |  | 0.744  | 0.031  | 0.072   | 0.0035   | 0.71612            | 563      | 18    | 448   | 21       | 1064  | 70       | DISC  | DISC     | 20.4     |          | Single Age   |              |  |
| SFB03_51                                 | 149.6 | 5.55            |  | 0.394  | 0.02   | 0.0493  | 0.0033   | 0.66407            | 336      | 15    | 310   | 20       | 490   | 110      | 310   | 20       | 7.7      |          | Single Age   |              |  |
| SFB03_52                                 | 71.9  | 1.171           |  | 0.431  | 0.034  | 0.0494  | 0.0033   | 0.74893            | 362      | 24    | 311   | 20       | 788   | 93       | DISC  | DISC     | 14.1     |          | Single Age   |              |  |
| SFB03_54                                 | 199.2 | 3.324           |  | 0.751  | 0.018  | 0.0914  | 0.0023   | 0.67765            | 568      | 11    | 566   | 14       | 568   | 44       | 566   | 14       | 0.4      |          | Single Age   |              |  |
| SFB03_55                                 | 500   | 2.64            |  | 0.722  | 0.021  | 0.0885  | 0.002    | 0.69569            | 555      | 10    | 546   | 12       | 604   | 46       | 546   | 12       | 1.6      |          | Single Age   |              |  |
| SFB03_56                                 | 165.3 | 1.223           |  | 0.762  | 0.026  | 0.0872  | 0.003    | 0.69               |          |       |       |          |       |          |       |          |          |          |              |              |  |

|           |       |       |        |        |         |         |         |       |     |       |     |      |     |       |      |      |            |
|-----------|-------|-------|--------|--------|---------|---------|---------|-------|-----|-------|-----|------|-----|-------|------|------|------------|
| SFB03_93  | 92.9  | 22.7  | 0.34   | 0.02   | 0.0473  | 0.0031  | 0.47492 | 296   | 15  | 298   | 19  | 320  | 140 | 298   | 19   | 0.7  | Single Age |
| SFB03_94  | 142.3 | 4.87  | 0.736  | 0.028  | 0.0854  | 0.0039  | 0.44903 | 560   | 16  | 528   | 23  | 727  | 82  | 528   | 23   | 5.7  | Single Age |
| SFB03_95  | 315   | 6.26  | 0.355  | 0.011  | 0.0432  | 0.0013  | 0.68541 | 309.7 | 8.3 | 272.6 | 7.9 | 623  | 53  | DISC  | DISC | 12.0 | Single Age |
| SFB03_98  | 23.5  | 3.98  | 0.862  | 0.099  | 0.0667  | 0.0034  | 0.04619 | 622   | 52  | 416   | 20  | 1410 | 230 | DISC  | DISC | 33.1 | Single Age |
| SFB03_99  | 273   | 10.96 | 0.798  | 0.016  | 0.0977  | 0.0019  | 0.55906 | 594.9 | 9   | 601   | 11  | 591  | 42  | 601   | 11   | 1.0  | Single Age |
| SFB03_100 | 75.5  | 1.766 | 0.712  | 0.056  | 0.0831  | 0.005   | 0.60803 | 543   | 33  | 514   | 30  | 670  | 130 | 514   | 30   | 5.3  | Single Age |
| SFB03_101 | 32.7  | 1.97  | 14.21  | 0.8    | 0.522   | 0.032   | 0.79565 | 2750  | 53  | 2730  | 140 | 2786 | 69  | 2786  | 69   | 2.0  | Single Age |
| SFB03_102 | 203   | 4.36  | 0.932  | 0.079  | 0.072   | 0.0032  | 0.39231 | 665   | 42  | 448   | 19  | 1530 | 200 | DISC  | DISC | 32.6 | Single Age |
| SFB03_103 | 254.5 | 2.595 | 0.3415 | 0.0096 | 0.04668 | 0.00096 | 0.6375  | 297.8 | 7.3 | 294.1 | 5.9 | 347  | 50  | 294.1 | 5.9  | 1.2  | Single Age |
| SFB03_104 | 60.1  | 4.75  | 0.704  | 0.031  | 0.0854  | 0.0031  | 0.45703 | 542   | 18  | 528   | 18  | 591  | 94  | 528   | 18   | 2.6  | Single Age |
| SFB03_105 | 189   | 0.984 | 0.736  | 0.038  | 0.0899  | 0.004   | 0.75364 | 561   | 23  | 558   | 24  | 569  | 64  | 558   | 24   | 0.5  | Single Age |
| SFB03_106 | 508   | 19.6  | 0.523  | 0.013  | 0.0659  | 0.0018  | 0.53222 | 426.5 | 8.7 | 412   | 11  | 491  | 53  | 412   | 11   | 3.4  | Single Age |
| SFB03_107 | 485   | 1.902 | 0.2905 | 0.0059 | 0.04036 | 0.00068 | 0.528   | 258.9 | 4.6 | 255   | 4.2 | 274  | 43  | 255   | 4.2  | 1.5  | Single Age |
| SFB03_108 | 567   | 14.69 | 0.432  | 0.01   | 0.0575  | 0.00096 | 0.5652  | 364.5 | 7.3 | 360.4 | 5.8 | 395  | 49  | 360.4 | 5.8  | 1.1  | Single Age |
| SFB03_109 | 306.8 | 76.8  | 0.3707 | 0.007  | 0.05076 | 0.00088 | 0.47511 | 319.9 | 5.1 | 319.1 | 5.4 | 342  | 40  | 319.1 | 5.4  | 0.3  | Single Age |
| SFB03_110 | 77.1  | 1.073 | 0.31   | 0.012  | 0.0423  | 0.0012  | 0.15715 | 273.5 | 9.6 | 267   | 7.3 | 283  | 90  | 267   | 7.3  | 2.4  | Single Age |
| SFB03_111 | 223.6 | 1.47  | 0.3587 | 0.0086 | 0.04769 | 0.0008  | 0.28656 | 311.7 | 6.2 | 300.3 | 4.9 | 376  | 57  | 300.3 | 4.9  | 3.7  | Single Age |
| SFB03_112 | 138   | 3.07  | 0.371  | 0.012  | 0.04996 | 0.00095 | 0.11065 | 320.1 | 8.6 | 314.2 | 5.8 | 364  | 77  | 314.2 | 5.8  | 1.8  | Single Age |
| SFB03_113 | 481   | 17.8  | 0.449  | 0.015  | 0.0568  | 0.0017  | 0.58026 | 376   | 11  | 356   | 10  | 478  | 61  | 356   | 10   | 5.3  | Rim        |
| SFB03_113 | 112   | 2.12  | 0.6    | 0.031  | 0.0746  | 0.0037  | 0.37448 | 476   | 20  | 464   | 22  | 530  | 120 | 464   | 22   | 2.5  | Core       |
| SFB03_114 | 968   | 137   | 0.3935 | 0.0088 | 0.0522  | 0.0014  | 0.65265 | 336.7 | 6.4 | 328.1 | 8.6 | 331  | 50  | 328.1 | 8.6  | 2.6  | Single Age |
| SFB03_115 | 301.5 | 7.96  | 5.33   | 0.11   | 0.3197  | 0.0059  | 0.68977 | 1873  | 17  | 1788  | 29  | 1943 | 28  | 1943  | 28   | 8.0  | Single Age |
| SFB03_116 | 524   | 3.44  | 0.3237 | 0.0051 | 0.04445 | 0.00072 | 0.39283 | 284.6 | 3.9 | 280.8 | 4.4 | 320  | 41  | 280.8 | 4.4  | 1.3  | Single Age |
| SFB03_117 | 825   | 41.8  | 0.43   | 0.015  | 0.0581  | 0.0021  | 0.50238 | 363   | 11  | 364   | 13  | 342  | 81  | 364   | 13   | 0.3  | Rim        |
| SFB03_117 | 448   | 17.8  | 4.2    | 0.087  | 0.2744  | 0.0049  | 0.59505 | 1673  | 17  | 1563  | 25  | 1828 | 32  | 1828  | 32   | 14.5 | Core       |
| SFB03_118 | 107.2 | 3.47  | 0.295  | 0.015  | 0.0325  | 0.0012  | 0.3973  | 262   | 12  | 206.2 | 7.8 | 830  | 120 | DISC  | DISC | 21.3 | Single Age |
| SFB03_119 | 429   | 1.209 | 0.48   | 0.011  | 0.0623  | 0.0019  | 0.53357 | 397.6 | 7.4 | 390   | 11  | 443  | 62  | 390   | 11   | 1.9  | Single Age |
| SFB03_120 | 187.2 | 1.039 | 0.2514 | 0.0077 | 0.03491 | 0.00079 | 0.22344 | 227.5 | 6.2 | 221.2 | 4.9 | 271  | 79  | 221.2 | 4.9  | 2.8  | Single Age |

| Sample Name:                             |       | OA-13-SFB04 |        |                 |          |         |          |       |                    |          |       |          |       |          |          |          |              |              |  |  |  |  |  |
|------------------------------------------|-------|-------------|--------|-----------------|----------|---------|----------|-------|--------------------|----------|-------|----------|-------|----------|----------|----------|--------------|--------------|--|--|--|--|--|
| Lower Freshwater Molasse I (26 ± 0.5 Ma) |       |             |        | Isotopic Ratios |          |         |          |       | Apparent Ages (Ma) |          |       |          |       |          |          |          |              |              |  |  |  |  |  |
| Grain #                                  |       | U           | U/Th   | 207Pb           | 2σ error | 206Pb   | 2σ error | Error | 207Pb              | 2σ error | 206Pb | 2σ error | 207Pb | 2σ error | Best age | 2σ error | Discordance* | Rim, Core or |  |  |  |  |  |
|                                          |       | (ppm)       |        | 235U            | (abs.)   | 238U    | (abs.)   | Corr. | 235U               | (Ma)     | 238U  | (Ma)     | 206Pb | (Ma)     | (Ma)     | (Ma)     |              | Single Age   |  |  |  |  |  |
| SFB04_1                                  | 306   | 3.66        | 0.595  | 0.011           | 0.0753   | 0.0011  | 0.52789  | 474.6 | 6.8                | 468.1    | 6.7   | 494      | 34    | 468.1    | 6.7      | 1.4      | Single Age   |              |  |  |  |  |  |
| SFB04_2                                  | 449   | 0.848       | 0.853  | 0.014           | 0.1025   | 0.0014  | 0.15648  | 626.1 | 7.4                | 629.1    | 8.2   | 589      | 36    | 629.1    | 8.2      | 0.5      | Single Age   |              |  |  |  |  |  |
| SFB04_3                                  | 34.18 | 1.345       | 0.443  | 0.024           | 0.057    | 0.0015  | 0.12093  | 370   | 17                 | 357.4    | 8.9   | 430      | 110   | 357.4    | 8.9      | 3.4      | Single Age   |              |  |  |  |  |  |
| SFB04_4                                  | 458   | 1.46        | 0.59   | 0.024           | 0.072    | 0.003   | 0.69544  | 470   | 16                 | 448      | 18    | 531      | 81    | 448      | 18       | 4.7      | Rim          |              |  |  |  |  |  |
| SFB04_4                                  | 316.4 | 0.819       | 0.723  | 0.022           | 0.0834   | 0.0024  | 0.68912  | 552   | 13                 | 516      | 14    | 683      | 47    | 516      | 14       | 6.5      | Core         |              |  |  |  |  |  |
| SFB04_5                                  | 295   | 30.8        | 0.593  | 0.021           | 0.0747   | 0.0019  | 0.55867  | 472   | 14                 | 464      | 11    | 499      | 60    | 464      | 11       | 1.7      | Rim          |              |  |  |  |  |  |
| SFB04_5                                  | 63.5  | 1.057       | 0.8    | 0.028           | 0.0981   | 0.0022  | 0.22546  | 599   | 15                 | 603      | 13    | 590      | 83    | 603      | 13       | 0.7      | Core         |              |  |  |  |  |  |
| SFB04_6                                  | 421   | 8.71        | 0.559  | 0.023           | 0.0686   | 0.0019  | 0.49305  | 451   | 15                 | 428      | 11    | 522      | 87    | 428      | 11       | 5.1      | Single Age   |              |  |  |  |  |  |
| SFB04_7                                  | 334   | 1.32        | 0.795  | 0.013           | 0.0952   | 0.0021  | 0.46733  | 593.8 | 7.1                | 586      | 12    | 607      | 44    | 586      | 12       | 1.3      | Single Age   |              |  |  |  |  |  |
| SFB04_9                                  | 257   | 11.9        | 0.535  | 0.028           | 0.0665   | 0.0029  | 0.77797  | 438   | 20                 | 415      | 17    | 576      | 61    | 415      | 17       | 5.3      | Single Age   |              |  |  |  |  |  |
| SFB04_10                                 | 299   | 1.462       | 1.695  | 0.031           | 0.1663   | 0.0035  | 0.64473  | 1006  | 12                 | 991      | 19    | 1033     | 33    | 1033     | 33       | 4.1      | Single Age   |              |  |  |  |  |  |
| SFB04_11                                 | 843   | 9.85        | 0.737  | 0.026           | 0.0891   | 0.0037  | 0.78004  | 560   | 15                 | 550      | 22    | 578      | 58    | 550      | 22       | 1.8      | Rim          |              |  |  |  |  |  |
| SFB04_11                                 | 625   | 12.24       | 0.84   | 0.02            | 0.0999   | 0.0022  | 0.5356   | 619   | 11                 | 614      | 13    | 612      | 47    | 614      | 13       | 0.8      | Core         |              |  |  |  |  |  |
| SFB04_12                                 | 316   | 9.6         | 0.524  | 0.011           | 0.0668   | 0.0015  | 0.57842  | 427.4 | 7.4                | 416.6    | 8.8   | 455      | 41    | 416.6    | 8.8      | 2.5      | Single Age   |              |  |  |  |  |  |
| SFB04_13                                 | 92.3  | 1.738       | 6.27   | 0.13            | 0.3541   | 0.0072  | 0.39925  | 2014  | 18                 | 1954     | 34    | 2070     | 42    | 2070     | 42       | 5.6      | Single Age   |              |  |  |  |  |  |
| SFB04_14                                 | 569   | 11.76       | 0.472  | 0.018           | 0.0602   | 0.0025  | 0.79884  | 392   | 13                 | 377      | 15    | 453      | 65    | 377      | 15       | 3.8      | Single Age   |              |  |  |  |  |  |
| SFB04_15                                 | 342   | 5.1         | 0.884  | 0.028           | 0.1029   | 0.0028  | 0.42616  | 643   | 15                 | 631      | 16    | 694      | 61    | 631      | 16       | 1.9      | Rim          |              |  |  |  |  |  |
| SFB04_15                                 | 102.5 | 0.87        | 0.99   | 0.03            | 0.1137   | 0.0025  | 0.09655  | 698   | 16                 | 694      | 15    | 734      | 91    | 694      | 15       | 0.6      | Core         |              |  |  |  |  |  |
| SFB04_17                                 | 211.3 | 2.19        | 0.525  | 0.011           | 0.06657  | 0.00098 | 0.35245  | 427.7 | 7.4                | 415.4    | 5.9   | 470      | 44    | 415.4    | 5.9      | 2.9      | Single Age   |              |  |  |  |  |  |
| SFB04_18                                 | 431   | 15.9        | 0.458  | 0.014           | 0.06     | 0.0018  | 0.568    | 382   | 10                 | 376      | 11    | 385      | 50    | 376      | 11       | 1.6      | Rim          |              |  |  |  |  |  |
| SFB04_18                                 | 54.6  | 0.573       | 0.795  | 0.049           | 0.0941   | 0.004   | 0.59354  | 591   | 28                 | 579      | 24    | 661      | 96    | 579      | 24       | 2.0      | Core         |              |  |  |  |  |  |
| SFB04_19                                 | 223.3 | 32.6        | 0.562  | 0.024           | 0.0706   | 0.0028  | 0.45642  | 458   | 15                 | 440      | 17    | 528      | 87    | 440      | 17       | 3.9      | Single Age   |              |  |  |  |  |  |
| SFB04_20                                 | 106.6 | 3.73        | 0.44   | 0.02            | 0.0442   | 0.0018  | 0.35125  | 372   | 14                 | 279      | 11    | 962      | 81    | DISC     | DISC     | 25.0     | Single Age   |              |  |  |  |  |  |
| SFB04_21                                 | 89.1  | 2.449       | 7.74   | 0.18            | 0.3361   | 0.0081  | 0.68504  | 2201  | 21                 | 1866     | 39    | 2533     | 32    | DISC     | DISC     | 26.3     | Single Age   |              |  |  |  |  |  |
| SFB04_22                                 | 258   | 1.542       | 0.504  | 0.029           | 0.0567   | 0.0037  | 0.68962  | 413   | 19                 | 355      | 23    | 790      | 110   | DISC     | DISC     | 14.0     | Single Age   |              |  |  |  |  |  |
| SFB04_23                                 | 287   | 2.68        | 0.807  | 0.014           | 0.0939   | 0.0017  | 0.48281  | 600   | 7.6                | 578.7    | 9.8   | 644      | 38    | 578.7    | 9.8      | 3.6      | Single Age   |              |  |  |  |  |  |
| SFB04_24                                 | 934   | 12.1        | 0.386  | 0.017           | 0.0481   | 0.0017  | 0.87578  | 331   | 12                 | 303      | 11    | 536      | 49    | 303      | 11       | 8.5      | Single Age   |              |  |  |  |  |  |
| SFB04_25                                 | 631   | 16.1        | 0.412  | 0.013           | 0.0552   | 0.0015  | 0.67512  | 350.3 | 9.3                | 346.3    | 9.3   | 376      | 55    | 346.3    | 9.3      | 1.1      | Rim          |              |  |  |  |  |  |
| SFB04_25                                 | 156.6 | 0.355       | 0.677  | 0.023           | 0.0841   | 0.0032  | 0.5152   | 525   | 14                 | 520      | 19    | 590      | 82    | 520      | 19       | 1.0      | Core         |              |  |  |  |  |  |
| SFB04_26                                 | 501   | 2.676       | 0.3319 | 0.0065          | 0.04504  | 0.00074 | 0.52692  | 290.8 | 4.9                | 284      | 4.6   | 343      | 41    | 284      | 4.6      | 2.3      | Single Age   |              |  |  |  |  |  |
| SFB04_27                                 | 181   | 2.707       | 0.484  | 0.015           | 0.0589   | 0.0016  | 0.5203   | 402.8 | 9.9                | 369.1    | 9.7   | 621      | 56    | 369.1    | 9.7      | 8.4      | Single Age   |              |  |  |  |  |  |
| SFB04_28                                 | 183.5 | 2.273       | 3.114  | 0.072           | 0.2121   | 0.0057  | 0.73791  | 1438  | 17                 | 1239     | 30    | 1751     | 30    | DISC     | DISC     | 29.2     | Single Age   |              |  |  |  |  |  |
| SFB04_29                                 | 151.7 | 2.119       | 0.343  | 0.018           | 0.0454   | 0.0016  | 0.63088  | 299   | 13                 | 286.4    | 9.7   | 442      | 80    | 286.4    | 9.7      | 4.2      | Single Age   |              |  |  |  |  |  |
| SFB04_30                                 | 127.7 | 59.4        | 0.408  | 0.016           | 0.0548   | 0.0024  | 0.42455  | 347   | 11                 | 344      | 14    | 401      | 88    | 344      | 14       | 0.9      | Single Age   |              |  |  |  |  |  |
| SFB04_31                                 | 72.6  | 0.833       | 0.716  | 0.047           | 0.0825   | 0.0034  | 0.64364  | 547   | 27                 | 511      | 20    | 730      | 110   | 511      | 20       | 6.6      | Single Age   |              |  |  |  |  |  |
| SFB04_32                                 | 31.26 | 2.034       | 0.598  | 0.035           | 0.0744   | 0.0027  | 0.0252   | 474   | 23                 | 462      | 16    | 540      | 140   | 462      | 16       | 2.5      | Single Age   |              |  |  |  |  |  |
| SFB04_33                                 | 76.1  | 19          | 0.583  | 0.04            | 0.0545   | 0.0032  | 0.59302  | 463   | 26                 | 342      | 20    | 1120     | 120   | DISC     | DISC     | 26.1     | Single Age   |              |  |  |  |  |  |
| SFB04_34                                 | 68.2  | 3.59        | 2.93   | 0.16            | 0.1354   | 0.0055  | 0.46343  | 1385  | 42                 | 818      | 31    | 2444     | 89    | DISC     | DISC     | 40.9     | Single Age   |              |  |  |  |  |  |
| SFB04_35                                 | 265   | 15.3        | 0.391  | 0.024           | 0.0493   | 0.0023  | 0.54424  | 335   | 18                 | 310      | 14    | 450      | 140   | 310      | 14       | 7.5      | Rim          |              |  |  |  |  |  |
| SFB04_35                                 | 94.9  | 0.905       | 4.12   | 0.16            | 0.2432   | 0.007   | 0.37054  | 1656  | 32                 | 1403     | 36    | 1986     | 76    | DISC     | DISC     | 29.4     | Core         |              |  |  |  |  |  |
| SFB04_36                                 | 85.5  | 24          | 0.696  | 0.049           | 0.0591   | 0.0033  | 0.57153  | 534   | 29                 | 370      | 20    | 1290     | 120   | DISC     | DISC     | 30.7     | Single Age   |              |  |  |  |  |  |
| SFB04_37                                 | 654   | 16.9        | 0.4102 | 0.0066          | 0.05539  | 0.00073 | 0.43958  | 348.9 | 4.8                | 347.2    | 4.5   | 364      | 34    | 347.2    | 4.5      | 0.5      | Single Age   |              |  |  |  |  |  |
| SFB04_38                                 | 672   | 1.323       | 0.3105 | 0.0066          | 0.04249  | 0.00073 | 0.60693  | 274.4 | 5.1                | 268.3    | 4.3   | 347      | 48    | 268.3    | 4.3      | 2.2      | Single Age   |              |  |  |  |  |  |
| SFB04_39                                 | 29.5  | 1.068       | 0.974  | 0.073           | 0.1007   | 0.0062  | 0.04577  | 688   | 38                 | 628      | 33    | 870      | 190   | 628      | 33       | 8.7      | Single Age   |              |  |  |  |  |  |
| SFB04_41                                 | 152   | 1.598       | 0.621  | 0.029           | 0.0717   | 0.0035  | 0.80938  | 488   | 18                 | 446      | 21    | 765      | 58    | 446      | 21       | 8.6      | Single Age   |              |  |  |  |  |  |
| SFB04_42                                 | 76.5  | 7.96        | 0.603  | 0.034           | 0.0718   | 0.0036  | 0.57495  | 478   | 21                 | 447      | 21    | 620      | 130   | 447      | 21       | 6.5      | Single Age   |              |  |  |  |  |  |
| SFB04_44                                 | 437   | 19.7        | 0.55   | 0.012           | 0.0708   | 0.0016  | 0.54439  | 444.6 | 7.6                | 442      | 9.1   | 424      | 50    | 442      | 9.1      | 0.6      | Single Age   |              |  |  |  |  |  |
| SFB04_45                                 | 824   | 15.4        | 0.415  | 0.019           | 0.0517   | 0.0023  | 0.56329  | 355   | 12                 | 325      | 14    | 538      | 70    | 325      | 14       | 8.5      | Single Age   |              |  |  |  |  |  |
| SFB04_47                                 | 92.3  | 4.53        | 1.014  | 0.064           | 0.0847   | 0.0044  | 0.66843  | 709   | 32                 | 524      | 26    | 1352     | 92    | DISC     | DISC     | 26.1     | Single Age   |              |  |  |  |  |  |
| SFB04_49                                 | 204.1 | 1.129       | 0.549  | 0.017           | 0.0692   | 0.0017  | 0.35271  | 443   | 11                 | 431      | 10    | 474      | 59    | 431      | 10       | 2.7      | Single Age   |              |  |  |  |  |  |
| SFB04_50                                 | 439.2 | 3.438       | 9.82   | 0.15            | 0.4075   | 0.009   | 0.58686  | 2421  | 15                 | 2203     | 41    | 2597     | 36    | 2597     | 36       | 15.2     | Single Age   |              |  |  |  |  |  |
| SFB04_51                                 | 811   | 3.39        | 0.3518 | 0.0082          | 0.0463   | 0.0013  | 0.26777  | 305.8 | 6.2                | 292.7    | 8.1   | 391      | 56    | 292.7    | 8.1      | 4.3      | Single Age   |              |  |  |  |  |  |
| SFB04_52                                 | 178.1 | 0.898       | 0.566  | 0.014           | 0.0718   | 0.001   | 0.04037  | 454.9 | 9.2                | 446.8    | 6.1   | 480      | 63    | 446.8    | 6.1      | 1.8      | Single Age   |              |  |  |  |  |  |
| SFB04_53                                 | 177   | 4.1         | 4.75   | 0.14            | 0.275    | 0.01    | 0.85078  | 1774  | 24                 | 1565     | 51    | 2038     | 34    | DISC     | DISC     | 23.2     | Single Age   |              |  |  |  |  |  |
| SFB04_54                                 | 359   | 2.3         | 0.3549 | 0.008           | 0.0497   | 0.001   | 0.50602  | 308.1 | 6                  | 312.7    | 6.3   | 278      | 46    | 312.7    | 6.3      | 1.5      | Single Age   |              |  |  |  |  |  |
| SFB04_55                                 | 486.9 | 0.8883      | 0.695  | 0.011           | 0.08056  | 0.00087 | 0.42181  | 535.6 | 6.3                | 499.4    | 5.2   | 678      | 36    | 499.4    | 5.2      | 6.8      | Single Age   |              |  |  |  |  |  |
| SFB04_56                                 | 194   | 5.45        | 6.52   | 0.15            | 0.3514   | 0.0079  | 0.69313  | 2052  | 20                 | 1940     | 38    | 2170     | 33    | 2170     | 33       | 10.6     | Single Age   |              |  |  |  |  |  |
| SFB04_57                                 | 320   | 2.81        | 0.528  | 0.013           | 0.06798  | 0.00098 | 0.60137  | 429.9 | 8.6                | 423.9    | 5.9   | 481      | 43    | 423.9    | 5.9      | 1.4      | Single Age   |              |  |  |  |  |  |
| SFB04_58                                 | 181   | 0.394       | 0.728  | 0.015           | 0.0877   | 0.001   | 0.17826  | 557.8 | 8.6                | 542.1    | 6.3   | 626      | 48    | 542.1    | 6.3      | 2.8      | Single Age   |              |  |  |  |  |  |
| SFB04_59                                 | 290   | 6.4         | 0.616  | 0.018           | 0.0782   | 0.0013  | 0.25179  | 487   | 12                 | 485.4    | 7.6   | 468      | 60    | 485.4    | 7.6      | 0.3      | Single Age   |              |  |  |  |  |  |
| SFB04_60                                 | 962   | 56          | 0.357  | 0.012           | 0.0493   | 0.0014  | 0.52744  | 309.9 | 9.1                | 31       |       |          |       |          |          |          |              |              |  |  |  |  |  |

|           |       |        |        |        |         |         |         |       |     |       |     |      |     |       |      |      |            |
|-----------|-------|--------|--------|--------|---------|---------|---------|-------|-----|-------|-----|------|-----|-------|------|------|------------|
| SFB04_63  | 307   | 5.66   | 0.569  | 0.011  | 0.0711  | 0.0012  | 0.55812 | 456.8 | 6.8 | 442.9 | 7.1 | 512  | 38  | 442.9 | 7.1  | 3.0  | Single Age |
| SFB04_64  | 65.5  | 0.495  | 0.833  | 0.024  | 0.0967  | 0.0026  | 0.52043 | 614   | 13  | 595   | 15  | 646  | 64  | 595   | 15   | 3.1  | Single Age |
| SFB04_65  | 481   | 86.8   | 0.4083 | 0.0071 | 0.05428 | 0.00086 | 0.40135 | 347.4 | 5.1 | 341.4 | 5.1 | 345  | 43  | 341.4 | 5.1  | 1.7  | Single Age |
| SFB04_66  | 466   | 2.017  | 0.657  | 0.012  | 0.0814  | 0.0013  | 0.30506 | 512.8 | 7.6 | 504.7 | 7.9 | 536  | 47  | 504.7 | 7.9  | 1.6  | Single Age |
| SFB04_67  | 198.6 | 1.302  | 6.167  | 0.076  | 0.3629  | 0.0044  | 0.66536 | 1999  | 11  | 1996  | 21  | 1997 | 16  | 1997  | 16   | 0.1  | Single Age |
| SFB04_69  | 714   | 4.21   | 0.447  | 0.019  | 0.0598  | 0.002   | 0.35051 | 375   | 13  | 375   | 12  | 400  | 110 | 375   | 12   | 0.0  | Single Age |
| SFB04_70  | 47.6  | 1.383  | 3.86   | 0.17   | 0.2564  | 0.0079  | 0.64267 | 1602  | 35  | 1471  | 40  | 1777 | 71  | 1777  | 71   | 17.2 | Single Age |
| SFB04_71  | 780   | 3.18   | 0.2991 | 0.0059 | 0.04165 | 0.00073 | 0.71544 | 265.5 | 4.6 | 263   | 4.5 | 290  | 33  | 263   | 4.5  | 0.9  | Single Age |
| SFB04_72  | 960   | 232    | 0.412  | 0.027  | 0.0551  | 0.004   | 0.87429 | 349   | 20  | 346   | 24  | 427  | 83  | 346   | 24   | 0.9  | Rim        |
| SFB04_72  | 282   | 1.588  | 1.584  | 0.042  | 0.1575  | 0.0048  | 0.69846 | 963   | 17  | 942   | 27  | 970  | 41  | 970   | 41   | 2.9  | Core       |
| SFB04_73  | 511   | 1.31   | 0.703  | 0.014  | 0.0852  | 0.0018  | 0.67971 | 540.1 | 8.6 | 527   | 11  | 580  | 38  | 527   | 11   | 2.4  | Single Age |
| SFB04_74  | 164   | 2.174  | 0.759  | 0.014  | 0.0934  | 0.002   | 0.35101 | 572.6 | 8.3 | 575   | 12  | 566  | 43  | 575   | 12   | 0.4  | Single Age |
| SFB04_75  | 200   | 2.59   | 0.578  | 0.015  | 0.0737  | 0.002   | 0.25882 | 462.2 | 9.8 | 458   | 12  | 484  | 59  | 458   | 12   | 0.9  | Single Age |
| SFB04_76  | 182   | 2.94   | 0.723  | 0.024  | 0.09    | 0.003   | 0.65626 | 553   | 14  | 555   | 18  | 544  | 66  | 555   | 18   | 0.4  | Single Age |
| SFB04_77  | 72.5  | 2.95   | 0.725  | 0.023  | 0.0761  | 0.002   | 0.30719 | 553   | 14  | 473   | 12  | 884  | 80  | DISC  | DISC | 14.5 | Single Age |
| SFB04_79  | 650   | 51.2   | 0.62   | 0.12   | 0.0425  | 0.0018  | 0.25645 | 484   | 77  | 269   | 11  | 1610 | 340 | DISC  | DISC | 44.4 | Rim        |
| SFB04_79  | 1090  | 43.8   | 0.602  | 0.012  | 0.0741  | 0.0014  | 0.35932 | 478.2 | 7.4 | 460.6 | 8.4 | 553  | 48  | 460.6 | 8.4  | 3.7  | Core       |
| SFB04_81  | 78.3  | 1.38   | 7.18   | 0.14   | 0.3858  | 0.0078  | 0.59898 | 2131  | 17  | 2102  | 36  | 2160 | 30  | 2160  | 30   | 2.7  | Single Age |
| SFB04_82  | 276.4 | 1.668  | 0.879  | 0.013  | 0.1056  | 0.0014  | 0.44559 | 641   | 7   | 646.9 | 8.4 | 611  | 32  | 646.9 | 8.4  | 0.9  | Single Age |
| SFB04_83  | 125.6 | 0.738  | 0.555  | 0.018  | 0.0711  | 0.0016  | 0.53828 | 447   | 12  | 442.4 | 9.9 | 453  | 61  | 442.4 | 9.9  | 1.0  | Single Age |
| SFB04_84  | 1120  | 8.54   | 0.464  | 0.012  | 0.05273 | 0.00069 | 0.14703 | 386.9 | 8.4 | 331.2 | 4.2 | 740  | 66  | DISC  | DISC | 14.4 | Single Age |
| SFB04_85  | 234   | 1.49   | 6.62   | 0.2    | 0.356   | 0.013   | 0.61744 | 2063  | 27  | 1959  | 61  | 2156 | 52  | 2156  | 52   | 9.1  | Single Age |
| SFB04_87  | 930   | 4.9    | 0.877  | 0.025  | 0.1049  | 0.0033  | 0.83036 | 638   | 14  | 643   | 19  | 617  | 44  | 643   | 19   | 0.8  | Single Age |
| SFB04_88  | 504   | 0.889  | 0.4445 | 0.0069 | 0.05817 | 0.00092 | 0.4976  | 373.8 | 4.9 | 364.5 | 5.6 | 392  | 36  | 364.5 | 5.6  | 2.5  | Single Age |
| SFB04_89  | 520   | 96.1   | 0.4074 | 0.0058 | 0.05481 | 0.00092 | 0.39966 | 346.9 | 4.2 | 344   | 5.6 | 363  | 42  | 344   | 5.6  | 0.8  | Single Age |
| SFB04_90  | 78.6  | 2.88   | 0.564  | 0.027  | 0.0701  | 0.0027  | 0.39619 | 453   | 18  | 437   | 16  | 506  | 83  | 437   | 16   | 3.5  | Single Age |
| SFB04_91  | 408   | 2.52   | 0.561  | 0.016  | 0.0698  | 0.0022  | 0.36799 | 452   | 11  | 435   | 13  | 548  | 81  | 435   | 13   | 3.8  | Single Age |
| SFB04_92  | 461   | 15.9   | 0.64   | 0.034  | 0.0814  | 0.0053  | 0.62898 | 501   | 21  | 504   | 31  | 420  | 120 | 504   | 31   | 0.6  | Rim        |
| SFB04_92  | 304.3 | 2.179  | 4.616  | 0.079  | 0.2803  | 0.0057  | 0.71201 | 1751  | 14  | 1592  | 28  | 1920 | 27  | 1920  | 27   | 17.1 | Core       |
| SFB04_93  | 652   | 1.42   | 0.3455 | 0.0048 | 0.04771 | 0.00066 | 0.43324 | 301.2 | 3.6 | 300.4 | 4.1 | 285  | 33  | 300.4 | 4.1  | 0.3  | Single Age |
| SFB04_94  | 711   | 18.68  | 0.5971 | 0.0069 | 0.0759  | 0.00079 | 0.41659 | 475.8 | 4.5 | 471.6 | 4.7 | 475  | 30  | 471.6 | 4.7  | 0.9  | Single Age |
| SFB04_95  | 641   | 3.541  | 1.077  | 0.027  | 0.1186  | 0.0031  | 0.73858 | 744   | 13  | 723   | 18  | 763  | 33  | 723   | 18   | 2.8  | Single Age |
| SFB04_96  | 169.6 | 0.763  | 1.289  | 0.023  | 0.1371  | 0.0022  | 0.35642 | 846   | 11  | 828   | 12  | 882  | 46  | 828   | 12   | 2.1  | Single Age |
| SFB04_97  | 61.7  | 1.566  | 0.313  | 0.013  | 0.0425  | 0.0011  | 0.26839 | 277.6 | 9.8 | 268.2 | 7   | 356  | 97  | 268.2 | 7    | 3.4  | Single Age |
| SFB04_98  | 125   | 0.524  | 0.267  | 0.019  | 0.0347  | 0.0017  | 0.1912  | 240   | 15  | 220   | 10  | 410  | 170 | 220   | 10   | 8.3  | Single Age |
| SFB04_99  | 279   | 2.977  | 1.078  | 0.015  | 0.1194  | 0.0019  | 0.36531 | 742.2 | 7.3 | 727   | 11  | 765  | 41  | 727   | 11   | 2.0  | Single Age |
| SFB04_101 | 379   | 2.84   | 0.5591 | 0.0095 | 0.0722  | 0.0012  | 0.45586 | 450.6 | 6.2 | 449.1 | 7.5 | 443  | 38  | 449.1 | 7.5  | 0.3  | Single Age |
| SFB04_102 | 670   | 2.84   | 0.326  | 0.012  | 0.044   | 0.0018  | 0.59805 | 286   | 8.9 | 277   | 11  | 322  | 90  | 277   | 11   | 3.1  | Single Age |
| SFB04_103 | 149   | 1.411  | 0.336  | 0.011  | 0.04571 | 0.00099 | 0.07619 | 293.5 | 8.4 | 288   | 6.1 | 310  | 76  | 288   | 6.1  | 1.9  | Single Age |
| SFB04_105 | 300   | 0.76   | 0.3375 | 0.0063 | 0.0456  | 0.00059 | 0.20574 | 295.1 | 4.8 | 287.4 | 3.7 | 325  | 49  | 287.4 | 3.7  | 2.6  | Single Age |
| SFB04_106 | 582   | 9.64   | 0.348  | 0.0042 | 0.04697 | 0.00057 | 0.29356 | 303.2 | 3.1 | 295.9 | 3.5 | 335  | 35  | 295.9 | 3.5  | 2.4  | Single Age |
| SFB04_107 | 50.2  | 1.015  | 0.575  | 0.024  | 0.0715  | 0.0025  | 0.08146 | 460   | 16  | 445   | 15  | 500  | 130 | 445   | 15   | 3.3  | Single Age |
| SFB04_108 | 220   | 7.02   | 0.623  | 0.028  | 0.0797  | 0.0018  | 0.47309 | 491   | 17  | 495   | 11  | 496  | 79  | 495   | 11   | 0.8  | Rim        |
| SFB04_108 | 394   | 0.8    | 0.862  | 0.013  | 0.1013  | 0.0014  | 0.59688 | 630.8 | 7.3 | 622.2 | 8.1 | 645  | 32  | 622.2 | 8.1  | 1.4  | Core       |
| SFB04_109 | 83.2  | 1.448  | 11.94  | 0.21   | 0.4789  | 0.009   | 0.57343 | 2599  | 16  | 2521  | 39  | 2644 | 32  | 2644  | 32   | 4.7  | Single Age |
| SFB04_111 | 84.4  | 2.37   | 0.807  | 0.029  | 0.0944  | 0.0022  | 0.5085  | 598   | 16  | 581   | 13  | 628  | 63  | 581   | 13   | 2.8  | Single Age |
| SFB04_112 | 228   | 1.419  | 0.462  | 0.016  | 0.0592  | 0.0021  | 0.7066  | 385   | 11  | 370   | 13  | 416  | 63  | 370   | 13   | 3.9  | Single Age |
| SFB04_113 | 309.4 | 5.66   | 0.557  | 0.01   | 0.06928 | 0.0009  | 0.25077 | 449.2 | 6.6 | 431.8 | 5.4 | 495  | 44  | 431.8 | 5.4  | 3.9  | Single Age |
| SFB04_114 | 331   | 1.13   | 0.866  | 0.014  | 0.1004  | 0.0017  | 0.53867 | 633.2 | 7.7 | 616   | 10  | 677  | 35  | 616   | 10   | 2.7  | Single Age |
| SFB04_115 | 62.8  | 0.627  | 0.842  | 0.023  | 0.0982  | 0.0022  | 0.0445  | 619   | 13  | 604   | 13  | 693  | 76  | 604   | 13   | 2.4  | Single Age |
| SFB04_116 | 111.5 | 1.04   | 0.382  | 0.011  | 0.0532  | 0.0011  | 0.42929 | 327.8 | 8.1 | 334.4 | 6.5 | 262  | 63  | 334.4 | 6.5  | 2.0  | Single Age |
| SFB04_117 | 2.916 | 0.1148 | 25.06  | 0.74   | 0.253   | 0.013   | 0.04021 | 3308  | 30  | 1450  | 67  | 4842 | 95  | DISC  | DISC | 70.1 | Single Age |
| SFB04_120 | 26.22 | 1.775  | 0.757  | 0.032  | 0.0917  | 0.0027  | 0.25831 | 570   | 18  | 565   | 16  | 595  | 99  | 565   | 16   | 0.9  | Single Age |

| Sample Name:                              |         | 10SMB06 |                 |          |         |          |         |                    |          |       |          |       |          |          |          |              |              |  |  |  |  |
|-------------------------------------------|---------|---------|-----------------|----------|---------|----------|---------|--------------------|----------|-------|----------|-------|----------|----------|----------|--------------|--------------|--|--|--|--|
| Lower Freshwater Molasse II (23 ± 2.5 Ma) |         |         | Isotopic Ratios |          |         |          |         | Apparent Ages (Ma) |          |       |          |       |          |          |          |              |              |  |  |  |  |
| Grain #                                   | U (ppm) | U/Th    | 207Pb           | 2σ error | 206Pb   | 2σ error | Error   | 207Pb              | 2σ error | 206Pb | 2σ error | 207Pb | 2σ error | Best age | 2σ error | Discordance* | Rim, Core or |  |  |  |  |
|                                           |         |         | 235U            | (abs.)   | 238U    | (abs.)   | Corr.   | 235U               | (Ma)     | 238U  | (Ma)     | 206Pb | (Ma)     | (Ma)     | (Ma)     | %            | Single Age   |  |  |  |  |
| 10SMB06-1                                 | 341     | 0.551   | 0.551           | 0.025    | 0.0717  | 0.0037   | 0.83204 | 445.1              | 17       | 446   | 22       | 449   | 22       | 446.0    | 22.0     | -0.2         | Single Age   |  |  |  |  |
| 10SMB06-2                                 | 390     | 0.361   | 0.361           | 0.024    | 0.0484  | 0.0035   | 0.76545 | 312.6              | 18       | 304.3 | 21       | 374   | 23       | 304.3    | 21.0     | 2.7          | Single Age   |  |  |  |  |
| 10SMB06-3                                 | 1250    | 0.376   | 0.376           | 0.024    | 0.0509  | 0.0034   | 0.56508 | 323.2              | 18       | 319.7 | 21       | 340   | 36       | 319.7    | 21.0     | 1.1          | Single Age   |  |  |  |  |
| 10SMB06-4                                 | 527     | 0.360   | 0.36            | 0.023    | 0.0489  | 0.0034   | 0.67194 | 311.9              | 17       | 307.9 | 21       | 336   | 25       | 307.9    | 21.0     | 1.3          | Single Age   |  |  |  |  |
| 10SMB06-5                                 | 302.3   | 0.475   | 0.475           | 0.025    | 0.0621  | 0.0036   | 0.68205 | 393.6              | 17       | 389.2 | 22       | 451   | 31       | 389.2    | 22.0     | 1.1          | Single Age   |  |  |  |  |
| 10SMB06-6                                 | 553     | 0.345   | 0.3446          | 0.023    | 0.0476  | 0.0034   | 0.6625  | 300.2              | 17       | 299.9 | 21       | 320   | 22       | 299.9    | 21.0     | 0.1          | Single Age   |  |  |  |  |
| 10SMB06-7                                 | 56.3    | 0.218   | 0.2182          | 0.024    | 0.02692 | 0.0033   | 0.47772 | 199.8              | 19       | 171.2 | 21       | 552   | 73       | DISC     | DISC     | 14.3         | Single Age   |  |  |  |  |
| 10SMB06-8                                 | 318     | 0.349   | 0.349           | 0.023    | 0.0483  | 0.0034   | 0.78612 | 304.4              | 18       | 304   | 21       | 308   | 23       | 304.0    | 21.0     | 0.1          | Single Age   |  |  |  |  |
| 10SMB06-9                                 | 351     | 0.533   | 0.533           | 0.029    | 0.0704  | 0.0041   | 0.82794 | 433                | 19       | 438   | 25       | 385   | 25       | 438.0    | 25.0     | -1.2         | Single Age   |  |  |  |  |
| 10SMB06-10                                | 209     | 0.570   | 0.57            | 0.027    | 0.0741  | 0.0037   | 0.63946 | 457                | 18       | 460   | 22       | 461   | 32       | 460.0    | 22.0     | -0.7         | Single Age   |  |  |  |  |
| 10SMB06-11                                | 257     | 0.350   | 0.3497          | 0.023    | 0.0482  | 0.0035   | 0.73924 | 304.1              | 17       | 303.2 | 21       | 320   | 22       | 303.2    | 21.0     | 0.3          | Single Age   |  |  |  |  |
| 10SMB06-12                                | 123     | 0.355   | 0.355           | 0.024    | 0.0489  | 0.0035   | 0.68054 | 309                | 18       | 307.4 | 22       | 367   | 30       | 307.4    | 22.0     | 0.5          | Single Age   |  |  |  |  |
| 10SMB06-13                                | 586     | 0.349   | 0.3486          | 0.023    | 0.0476  | 0.0034   | 0.83101 | 303.4              | 17       | 299.7 | 21       | 321   | 18       | 299.7    | 21.0     | 1.2          | Single Age   |  |  |  |  |
| 10SMB06-14                                | 147     | 0.602   | 0.602           | 0.025    | 0.077   | 0.0036   | 0.77998 | 478.4              | 16       | 479.2 | 22       | 471   | 19       | 479.2    | 22.0     | -0.2         | Single Age   |  |  |  |  |
| 10SMB06-15                                | 215     | 0.790   | 0.79            | 0.072    | 0.0653  | 0.004    | 0.67102 | 576                | 40       | 407   | 24       | 1240  | 140      | DISC     | DISC     | 29.3         | Single Age   |  |  |  |  |
| 10SMB06-16                                | 610     | 0.594   | 0.594           | 0.028    | 0.0774  | 0.0038   | 0.79318 | 473                | 18       | 480   | 23       | 446   | 23       | 480.0    | 23.0     | -1.5         | Single Age   |  |  |  |  |
| 10SMB06-17                                | 362     | 0.399   | 0.399           | 0.024    | 0.0535  | 0.0036   | 0.69418 | 339.9              | 18       | 335.7 | 22       | 394   | 32       | 335.7    | 22.0     | 1.2          | Single Age   |  |  |  |  |
| 10SMB06-18                                | 481     | 0.348   | 0.3479          | 0.023    | 0.0481  | 0.0035   | 0.71869 | 302.8              | 17       | 303.5 | 21       | 324   | 19       | 303.5    | 21.0     | -0.2         | Single Age   |  |  |  |  |
| 10SMB06-19                                | 516     | 0.344   | 0.3435          | 0.023    | 0.0471  | 0.0034   | 0.74067 | 299.5              | 17       | 296.4 | 21       | 312   | 21       | 296.4    | 21.0     | 1.0          | Single Age   |  |  |  |  |
| 10SMB06-20                                | 199.8   | 0.337   | 0.3372          | 0.023    | 0.04734 | 0.0034   | 0.77641 | 294.8              | 18       | 298.1 | 21       | 297   | 18       | 298.1    | 21.0     | -1.1         | Single Age   |  |  |  |  |
| 10SMB06-21                                | 441     | 0.309   | 0.3093          | 0.023    | 0.0434  | 0.0034   | 0.80854 | 273.3              | 18       | 274.6 | 22       | 307   | 20       | 274.6    | 22.0     | -0.5         | Single Age   |  |  |  |  |
| 10SMB06-22                                | 267     | 0.337   | 0.3374          | 0.024    | 0.0468  | 0.0035   | 0.7746  | 294.7              | 18       | 294.6 | 22       | 286   | 24       | 294.6    | 22.0     | 0.0          | Single Age   |  |  |  |  |
| 10SMB06-23                                | 228.3   | 0.321   | 0.3213          | 0.023    | 0.0445  | 0.0034   | 0.72764 | 282.5              | 18       | 280.6 | 21       | 317   | 25       | 280.6    | 21.0     | 0.7          | Single Age   |  |  |  |  |
| 10SMB06-24                                | 220     | 0.342   | 0.3416          | 0.023    | 0.0476  | 0.0035   | 0.76443 | 298.1              | 18       | 299.9 | 21       | 338   | 21       | 299.9    | 21.0     | -0.6         | Single Age   |  |  |  |  |
| 10SMB06-25                                | 1340    | 0.288   | 0.288           | 0.026    | 0.0393  | 0.0037   | 0.82962 | 256                | 20       | 248   | 23       | 315   | 26       | 248.0    | 23.0     | 3.1          | Single Age   |  |  |  |  |
| 10SMB06-26                                | 553     | 0.570   | 5.37            | 0.22     | 0.339   | 0.015    | 0.95733 | 1854               | 47       | 1874  | 76       | 1826  | 26       | 1826.0   | 26.0     | -2.6         | Single Age   |  |  |  |  |
| 10SMB06-27                                | 300     | 0.599   | 0.5994          | 0.024    | 0.0786  | 0.0036   | 0.72707 | 475.5              | 15       | 487.6 | 22       | 443   | 20       | 487.6    | 22.0     | -2.3         | Single Age   |  |  |  |  |
| 10SMB06-28                                | 652     | 0.346   | 0.3462          | 0.023    | 0.0474  | 0.0035   | 0.71995 | 301.7              | 17       | 298.7 | 21       | 330   | 22       | 298.7    | 21.0     | 1.0          | Single Age   |  |  |  |  |
| 10SMB06-29                                | 1355    | 0.382   | 0.382           | 0.024    | 0.0487  | 0.0036   | 0.5964  | 327.8              | 18       | 306.2 | 22       | 487   | 38       | 306.2    | 22.0     | 6.6          | Single Age   |  |  |  |  |
| 10SMB06-30                                | 765     | 0.334   | 0.3335          | 0.023    | 0.04597 | 0.0034   | 0.80935 | 292                | 18       | 289.7 | 21       | 308   | 16       | 289.7    | 21.0     | 0.8          | Single Age   |  |  |  |  |
| 10SMB06-31                                | 1217    | 0.344   | 0.344           | 0.023    | 0.04739 | 0.0034   | 0.80391 | 300.1              | 17       | 298.4 | 21       | 320   | 11       | 298.4    | 21.0     | 0.6          | Single Age   |  |  |  |  |
| 10SMB06-32                                | 544     | 0.579   | 0.579           | 0.025    | 0.0743  | 0.0037   | 0.81628 | 463                | 16       | 462   | 22       | 468   | 17       | 462.0    | 22.0     | 0.2          | Single Age   |  |  |  |  |
| 10SMB06-33                                | 2670    | 0.238   | 0.2382          | 0.023    | 0.02689 | 0.0034   | 0.6923  | 217.3              | 18       | 171.6 | 22       | 775   | 35       | DISC     | DISC     | 21.0         | Single Age   |  |  |  |  |
| 10SMB06-34                                | 693     | 0.410   | 0.41            | 0.03     | 0.0526  | 0.0041   | 0.90172 | 352                | 21       | 330   | 25       | 545   | 26       | 330.0    | 25.0     | 6.3          | Single Age   |  |  |  |  |
| 10SMB06-35                                | 312     | 0.816   | 0.816           | 0.084    | 0.0564  | 0.0036   | 0.62779 | 600                | 49       | 353.7 | 22       | 1520  | 190      | DISC     | DISC     | 41.1         | Single Age   |  |  |  |  |
| 10SMB06-36                                | 166     | 0.312   | 0.3124          | 0.023    | 0.0442  | 0.0034   | 0.70248 | 275.7              | 18       | 278.8 | 21       | 263   | 19       | 278.8    | 21.0     | -1.1         | Single Age   |  |  |  |  |
| 10SMB06-37                                | 402     | 0.376   | 0.3759          | 0.024    | 0.0515  | 0.0035   | 0.75913 | 323.5              | 18       | 323.9 | 22       | 327   | 25       | 323.9    | 22.0     | -0.1         | Single Age   |  |  |  |  |
| 10SMB06-38                                | 1470    | 0.318   | 0.3183          | 0.024    | 0.0388  | 0.0037   | 0.94491 | 281.7              | 19       | 245   | 23       | 600   | 28       | DISC     | DISC     | 13.0         | Single Age   |  |  |  |  |
| 10SMB06-39                                | 669     | 0.400   | 0.4             | 0.026    | 0.0525  | 0.0036   | 0.58924 | 340.5              | 19       | 330   | 22       | 398   | 32       | 330.0    | 22.0     | 3.1          | Single Age   |  |  |  |  |

|             |       |        |        |       |         |        |         |       |     |       |     |      |     |        |      |      |            |
|-------------|-------|--------|--------|-------|---------|--------|---------|-------|-----|-------|-----|------|-----|--------|------|------|------------|
| 10SMB06-40  | 179.1 | 0.548  | 0.5479 | 0.025 | 0.0708  | 0.0036 | 0.79363 | 443.2 | 16  | 440.6 | 22  | 463  | 13  | 440.6  | 22.0 | 0.6  | Single Age |
| 10SMB06-41  | 595   | 0.349  | 0.3493 | 0.024 | 0.0454  | 0.0035 | 0.68798 | 304.6 | 17  | 286.2 | 22  | 438  | 22  | 286.2  | 22.0 | 6.0  | Single Age |
| 10SMB06-42  | 1067  | 0.338  | 0.3383 | 0.024 | 0.04651 | 0.0035 | 0.85294 | 296.3 | 18  | 293   | 22  | 320  | 18  | 293.0  | 22.0 | 1.1  | Single Age |
| 10SMB06-43  | 2760  | 0.295  | 0.295  | 0.027 | 0.0367  | 0.0038 | 0.92064 | 261   | 22  | 232.1 | 23  | 503  | 33  | DISC   | DISC | 11.1 | Single Age |
| 10SMB06-44  | 615   | 0.414  | 0.414  | 0.027 | 0.0562  | 0.0038 | 0.92762 | 350.8 | 19  | 352   | 23  | 356  | 14  | 352.0  | 23.0 | -0.3 | Single Age |
| 10SMB06-46  | 354   | 0.474  | 0.474  | 0.035 | 0.0589  | 0.0046 | 0.93161 | 391   | 24  | 368   | 28  | 553  | 22  | 368.0  | 28.0 | 5.9  | Single Age |
| 10SMB06-47  | 238   | 0.759  | 0.759  | 0.028 | 0.0938  | 0.0039 | 0.69347 | 574.1 | 16  | 578   | 23  | 564  | 23  | 578.0  | 23.0 | -0.7 | Single Age |
| 10SMB06-48  | 880   | 0.355  | 0.3548 | 0.024 | 0.04733 | 0.0036 | 0.58148 | 308.1 | 18  | 298.1 | 22  | 407  | 23  | 298.1  | 22.0 | 3.2  | Single Age |
| 10SMB06-49  | 204   | 0.327  | 0.3274 | 0.024 | 0.0458  | 0.0036 | 0.71717 | 287.1 | 19  | 289.2 | 23  | 301  | 20  | 289.2  | 23.0 | -0.7 | Single Age |
| 10SMB06-51  | 374   | 0.355  | 0.3549 | 0.025 | 0.0479  | 0.0037 | 0.73551 | 308.7 | 18  | 301.7 | 23  | 367  | 22  | 301.7  | 23.0 | 2.3  | Single Age |
| 10SMB06-52  | 1470  | 0.237  | 0.2365 | 0.024 | 0.0262  | 0.0036 | 0.72298 | 215   | 20  | 166.7 | 22  | 797  | 42  | DISC   | DISC | 22.5 | Single Age |
| 10SMB06-53  | 55.4  | 0.695  | 0.695  | 0.027 | 0.0846  | 0.0038 | 0.7363  | 535.2 | 16  | 523.5 | 22  | 612  | 19  | 523.5  | 22.0 | 2.2  | Single Age |
| 10SMB06-54  | 275   | 0.560  | 0.56   | 0.026 | 0.072   | 0.0037 | 0.88577 | 452   | 17  | 447.8 | 22  | 476  | 16  | 447.8  | 22.0 | 0.9  | Single Age |
| 10SMB06-55  | 383   | 0.551  | 0.551  | 0.027 | 0.0719  | 0.0039 | 0.82423 | 447.2 | 18  | 447   | 24  | 463  | 21  | 447.0  | 24.0 | 0.0  | Single Age |
| 10SMB06-56  | 264   | 0.616  | 0.616  | 0.026 | 0.0775  | 0.0038 | 0.63831 | 487.9 | 16  | 481   | 23  | 500  | 27  | 481.0  | 23.0 | 1.4  | Single Age |
| 10SMB06-58  | 933   | 0.405  | 0.4053 | 0.025 | 0.0544  | 0.0036 | 0.74965 | 346   | 17  | 341.6 | 22  | 362  | 19  | 341.6  | 22.0 | 1.3  | Single Age |
| 10SMB06-59  | 865   | 0.356  | 0.3555 | 0.024 | 0.04894 | 0.0036 | 0.8161  | 308.5 | 18  | 308   | 22  | 313  | 14  | 308.0  | 22.0 | 0.2  | Single Age |
| 10SMB06-60  | 219   | 6.010  | 6.01   | 0.2   | 0.368   | 0.012  | 0.79781 | 1972  | 29  | 2015  | 57  | 1919 | 22  | 1919.0 | 22.0 | -5.0 | Single Age |
| 10SMB06-61  | 616   | 0.524  | 0.524  | 0.032 | 0.0688  | 0.0044 | 0.89595 | 427   | 22  | 428   | 27  | 436  | 20  | 428.0  | 27.0 | -0.2 | Single Age |
| 10SMB06-62  | 274   | 0.657  | 0.657  | 0.026 | 0.0824  | 0.0039 | 0.83129 | 512.7 | 16  | 510   | 23  | 518  | 19  | 510.0  | 23.0 | 0.5  | Single Age |
| 10SMB06-63  | 320   | 0.562  | 0.562  | 0.026 | 0.0724  | 0.0038 | 0.68738 | 452.2 | 17  | 451.3 | 23  | 475  | 23  | 451.3  | 23.0 | 0.2  | Single Age |
| 10SMB06-65  | 2250  | 0.466  | 0.466  | 0.032 | 0.03751 | 0.0035 | -0.2036 | 388   | 22  | 238   | 22  | 1357 | 96  | DISC   | DISC | 38.7 | Single Age |
| 10SMB06-66  | 893   | 0.557  | 0.557  | 0.025 | 0.0727  | 0.0038 | 0.74683 | 450.4 | 17  | 452.4 | 23  | 433  | 17  | 452.4  | 23.0 | -0.4 | Single Age |
| 10SMB06-67  | 250   | 0.479  | 0.479  | 0.027 | 0.0627  | 0.0039 | 0.55363 | 397.6 | 19  | 391.6 | 23  | 450  | 19  | 391.6  | 23.0 | 1.5  | Single Age |
| 10SMB06-68  | 585   | 0.405  | 0.405  | 0.026 | 0.054   | 0.0038 | 0.78331 | 345   | 18  | 339   | 23  | 382  | 24  | 339.0  | 23.0 | 1.7  | Single Age |
| 10SMB06-69  | 713   | 4.760  | 4.76   | 0.18  | 0.321   | 0.013  | 0.78679 | 1776  | 32  | 1793  | 61  | 1774 | 27  | 1774.0 | 27.0 | -1.1 | Single Age |
| 10SMB06-70  | 200   | 0.781  | 0.781  | 0.028 | 0.0929  | 0.0038 | 0.73839 | 585.3 | 16  | 573.7 | 23  | 632  | 17  | 573.7  | 23.0 | 2.0  | Single Age |
| 10SMB06-72  | 352   | 0.540  | 0.5395 | 0.025 | 0.0684  | 0.0037 | 0.68454 | 439   | 17  | 426.6 | 22  | 495  | 19  | 426.6  | 22.0 | 2.8  | Single Age |
| 10SMB06-73  | 226   | 0.344  | 0.3442 | 0.025 | 0.0481  | 0.0037 | 0.75707 | 300   | 19  | 303.8 | 23  | 293  | 21  | 303.8  | 23.0 | -1.3 | Single Age |
| 10SMB06-74  | 2120  | 0.283  | 0.283  | 0.029 | 0.0287  | 0.0038 | 0.13421 | 251   | 22  | 182.2 | 24  | 960  | 110 | DISC   | DISC | 27.4 | Single Age |
| 10SMB06-75  | 831   | 0.559  | 0.559  | 0.027 | 0.0722  | 0.0039 | 0.86069 | 451.1 | 17  | 449   | 24  | 446  | 17  | 449.0  | 24.0 | 0.5  | Single Age |
| 10SMB06-76  | 431   | 0.488  | 0.488  | 0.032 | 0.0645  | 0.0044 | 0.95502 | 407   | 22  | 402   | 27  | 456  | 17  | 402.0  | 27.0 | 1.2  | Single Age |
| 10SMB06-77  | 179   | 0.337  | 0.3367 | 0.025 | 0.04593 | 0.0037 | 0.63104 | 294.3 | 19  | 289.4 | 23  | 329  | 25  | 289.4  | 23.0 | 1.7  | Single Age |
| 10SMB06-78  | 904   | 0.367  | 0.367  | 0.024 | 0.0435  | 0.0037 | 0.4961  | 317.2 | 18  | 274.7 | 23  | 643  | 49  | DISC   | DISC | 13.4 | Single Age |
| 10SMB06-79  | 788   | 0.347  | 0.3472 | 0.025 | 0.04767 | 0.0037 | 0.71939 | 302.3 | 19  | 300.2 | 23  | 324  | 20  | 300.2  | 23.0 | 0.7  | Single Age |
| 10SMB06-80  | 116.9 | 0.538  | 0.538  | 0.026 | 0.0698  | 0.0038 | 0.74693 | 437.2 | 17  | 434.9 | 23  | 468  | 21  | 434.9  | 23.0 | 0.5  | Single Age |
| 10SMB06-81  | 256   | 0.338  | 0.3375 | 0.025 | 0.0468  | 0.0037 | 0.72882 | 295   | 19  | 294.6 | 23  | 293  | 19  | 294.6  | 23.0 | 0.1  | Single Age |
| 10SMB06-82  | 206   | 0.806  | 0.806  | 0.031 | 0.0742  | 0.0043 | 0.45219 | 603   | 17  | 461   | 26  | 1161 | 55  | DISC   | DISC | 23.5 | Single Age |
| 10SMB06-83  | 206   | 0.802  | 0.802  | 0.029 | 0.0962  | 0.0041 | 0.6351  | 597.3 | 16  | 592   | 24  | 642  | 22  | 592.0  | 24.0 | 0.9  | Single Age |
| 10SMB06-84  | 188.8 | 0.335  | 0.3354 | 0.025 | 0.04645 | 0.0037 | 0.70608 | 294   | 19  | 292.7 | 23  | 307  | 21  | 292.7  | 23.0 | 0.4  | Single Age |
| 10SMB06-85  | 1145  | 0.346  | 0.3462 | 0.025 | 0.0491  | 0.0037 | 0.83339 | 303.3 | 20  | 309.2 | 23  | 283  | 19  | 309.2  | 23.0 | -1.9 | Single Age |
| 10SMB06-86  | 137.9 | 0.710  | 0.71   | 0.027 | 0.0884  | 0.0039 | 0.73836 | 545.9 | 15  | 546   | 23  | 554  | 16  | 546.0  | 23.0 | 0.0  | Single Age |
| 10SMB06-87  | 357   | 0.552  | 0.552  | 0.027 | 0.0684  | 0.0038 | 0.81498 | 445.3 | 18  | 426.6 | 23  | 527  | 20  | 426.6  | 23.0 | 4.2  | Single Age |
| 10SMB06-88  | 275   | 0.562  | 0.5617 | 0.025 | 0.0727  | 0.0037 | 0.7708  | 452.3 | 16  | 452.3 | 22  | 460  | 13  | 452.3  | 22.0 | 0.0  | Single Age |
| 10SMB06-89  | 772   | 0.360  | 0.3604 | 0.026 | 0.0489  | 0.0038 | 0.77163 | 312   | 19  | 307.5 | 23  | 379  | 26  | 307.5  | 23.0 | 1.4  | Single Age |
| 10SMB06-90  | 1526  | 0.286  | 0.286  | 0.027 | 0.0338  | 0.0039 | 0.90552 | 256.1 | 21  | 214   | 24  | 641  | 33  | DISC   | DISC | 16.4 | Single Age |
| 10SMB06-91  | 167.3 | 0.329  | 0.3289 | 0.025 | 0.04597 | 0.0037 | 0.3702  | 288.5 | 19  | 289.7 | 23  | 282  | 30  | 289.7  | 23.0 | -0.4 | Single Age |
| 10SMB06-92  | 74.8  | 0.385  | 0.3846 | 0.025 | 0.05276 | 0.0037 | 0.65191 | 330   | 19  | 331.4 | 23  | 324  | 20  | 331.4  | 23.0 | -0.4 | Single Age |
| 10SMB06-94  | 970   | 0.354  | 0.3535 | 0.025 | 0.04895 | 0.0037 | 0.87189 | 307.8 | 18  | 308   | 23  | 304  | 11  | 308.0  | 23.0 | -0.1 | Single Age |
| 10SMB06-95  | 116.6 | 0.335  | 0.3353 | 0.025 | 0.04678 | 0.0037 | 0.63606 | 293.4 | 19  | 294.7 | 23  | 274  | 22  | 294.7  | 23.0 | -0.4 | Single Age |
| 10SMB06-96  | 422   | 0.385  | 0.3845 | 0.025 | 0.0527  | 0.0038 | 0.8243  | 330.9 | 18  | 331.1 | 23  | 318  | 21  | 331.1  | 23.0 | -0.1 | Single Age |
| 10SMB06-97  | 408   | 0.556  | 0.556  | 0.035 | 0.0636  | 0.0046 | 0.94659 | 447   | 23  | 397   | 28  | 707  | 16  | DISC   | DISC | 11.2 | Single Age |
| 10SMB06-100 | 0.831 | 35.200 | 35.2   | 5.5   | 0.391   | 0.054  | 0.98714 | 3500  | 160 | 2030  | 230 | 4583 | 36  | DISC   | DISC | 55.7 | Single Age |
| 10SMB06-101 | 506   | 0.338  | 0.338  | 0.026 | 0.0461  | 0.0039 | 0.74138 | 295   | 20  | 290.7 | 24  | 312  | 25  | 290.7  | 24.0 | 1.5  | Single Age |
| 10SMB06-103 | 245   | 0.345  | 0.3446 | 0.025 | 0.04863 | 0.0037 | 0.56559 | 300.4 | 19  | 306.1 | 23  | 285  | 23  | 306.1  | 23.0 | -1.9 | Single Age |
| 10SMB06-105 | 158   | 0.356  | 0.3559 | 0.026 | 0.04896 | 0.0038 | 0.33972 | 308.7 | 19  | 308.8 | 24  | 300  | 25  | 308.8  | 24.0 | 0.0  | Single Age |
| 10SMB06-106 | 311   | 0.335  | 0.335  | 0.026 | 0.04498 | 0.0037 | 0.62546 | 293.9 | 20  | 284.2 | 23  | 362  | 31  | 284.2  | 23.0 | 3.3  | Single Age |
| 10SMB06-108 | 159.9 | 0.332  | 0.332  | 0.025 | 0.04612 | 0.0037 | 0.69199 | 291   | 19  | 290.6 | 23  | 311  | 16  | 290.6  | 23.0 | 0.1  | Single Age |
| 10SMB06-110 | 389   | 0.586  | 0.586  | 0.026 | 0.0755  | 0.0039 | 0.824   | 469.6 | 17  | 468.9 | 23  | 473  | 11  | 468.9  | 23.0 | 0.1  | Single Age |
| 10SMB06-111 | 5140  | 0.390  | 0.39   | 0.03  | 0.0524  | 0.0045 | 0.89598 | 333   | 22  | 329   | 27  | 358  | 36  | 329.0  | 27.0 | 1.2  | Single Age |
| 10SMB06-112 | 186.5 | 0.759  | 0.759  | 0.032 | 0.0935  | 0.0043 | 0.7629  | 575   | 18  | 577   | 25  | 552  | 21  | 577.0  | 25.0 | -0.3 | Single Age |
| 10SMB06-113 | 1133  | 0.383  | 0.3827 | 0.026 | 0.0507  | 0.0039 | 0.82097 | 328.6 | 19  | 318.8 | 24  | 413  | 18  | 318.8  | 24.0 | 3.0  | Single Age |
| 10SMB06-115 | 244   | 0.353  | 0.353  | 0.028 | 0.04417 | 0.0037 | 0.49992 | 305.9 | 20  | 278.6 | 23  | 493  | 52  | 278.6  | 23.0 | 8.9  | Single Age |
| 10SMB06-116 | 0.559 | 71.900 | 71.9   | 8.7   | 0.724   | 0.087  | 0.98915 | 4200  | 120 | 3340  | 300 | 4775 | 21  | DISC   | DISC | 30.1 | Single Age |
| 10SMB06-117 | 681   | 0.644  | 0.644  | 0.036 | 0.0812  | 0.0048 | 0.94634 | 504   | 22  | 503   | 29  | 527  | 19  | 503.0  | 29.0 | 0.2  | Single Age |
| 10SMB06-118 | 3.85  | 1.360  | 1.36   | 0.27  | 0.0607  | 0.0067 | 0.59314 | 750   | 98  | 378   | 39  | 1820 | 220 | DISC   | DISC | 49.6 | Single Age |
| 10SMB06-119 | 481   | 0.548  | 0.5477 | 0.026 | 0.068   | 0.0038 | 0.7109  | 443.1 | 17  | 424   | 23  | 546  | 15  | 424.0  | 23.0 | 4.3  | Single Age |
| 10SMB06-120 | 144.6 | 1.086  | 1.086  | 0.045 | 0.1187  | 0.005  | 0.94566 | 748   | 21  | 722   | 29  | 803  | 18  | 722.0  | 29.0 | 3.5  | Single Age |
| 10SMB06-121 | 312   | 0.390  | 0.39   | 0.026 | 0.0534  | 0.0039 | 0.72729 | 334.8 | 18  | 335.3 | 24  | 356  | 19  | 335.3  | 24.0 | -0.1 | Single Age |
| 10SMB06-122 | 538   | 0.347  | 0.347  | 0.025 | 0.0478  | 0.0038 | 0.67096 | 302.3 | 19  | 300.9 | 23  | 319  | 19  | 300.9  | 23.0 | 0.5  | Single Age |
| 10SMB06-125 | 178.3 | 0.709  | 0.709  | 0.029 | 0.0857  | 0.0043 | 0.83223 | 543.5 | 17  | 530   | 25  | 585  | 19  | 530.0  | 25.0 | 2.5  | Single Age |
| 10SMB06-126 | 1310  | 0.333  | 0.3334 | 0.025 | 0.0465  | 0.0038 | 0.      |       |     |       |     |      |     |        |      |      |            |

|             |       |       |        |       |         |        |         |       |    |       |    |      |    |        |      |      |            |
|-------------|-------|-------|--------|-------|---------|--------|---------|-------|----|-------|----|------|----|--------|------|------|------------|
| 10SMB06-153 | 255   | 1.557 | 1.557  | 0.057 | 0.1563  | 0.0064 | 0.81492 | 950   | 23 | 939   | 37 | 1014 | 22 | 1014.0 | 22.0 | 7.4  | Single Age |
| 10SMB06-154 | 408   | 0.359 | 0.3587 | 0.027 | 0.0499  | 0.004  | 0.09993 | 310.9 | 20 | 313.8 | 24 | 271  | 23 | 313.8  | 24.0 | -0.9 | Single Age |
| 10SMB06-155 | 282   | 0.529 | 0.529  | 0.031 | 0.0657  | 0.0043 | 0.85988 | 430   | 20 | 410   | 26 | 545  | 20 | 410.0  | 26.0 | 4.7  | Single Age |
| 10SMB06-156 | 894   | 0.381 | 0.3814 | 0.027 | 0.0519  | 0.004  | 0.75148 | 328.3 | 20 | 326.4 | 24 | 329  | 18 | 326.4  | 24.0 | 0.6  | Single Age |
| 10SMB06-157 | 442   | 0.337 | 0.3366 | 0.027 | 0.0474  | 0.0039 | 0.73606 | 294.3 | 20 | 298.5 | 24 | 234  | 21 | 298.5  | 24.0 | -1.4 | Single Age |
| 10SMB06-159 | 314   | 0.629 | 0.629  | 0.035 | 0.0759  | 0.0044 | 0.77572 | 493   | 22 | 471   | 26 | 579  | 35 | 471.0  | 26.0 | 4.5  | Single Age |
| 10SMB06-160 | 407   | 1.101 | 1.101  | 0.038 | 0.1233  | 0.0047 | 0.8661  | 754   | 18 | 749   | 27 | 771  | 18 | 749.0  | 27.0 | 0.7  | Single Age |
| 10SMB06-161 | 489   | 0.315 | 0.3149 | 0.026 | 0.03963 | 0.0039 | 0.73888 | 277.8 | 20 | 250.5 | 24 | 514  | 14 | 250.5  | 24.0 | 9.8  | Single Age |
| 10SMB06-162 | 158   | 0.350 | 0.3498 | 0.027 | 0.04638 | 0.0039 | 0.57737 | 304.2 | 20 | 292.2 | 24 | 361  | 25 | 292.2  | 24.0 | 3.9  | Single Age |
| 10SMB06-163 | 208   | 0.572 | 0.572  | 0.028 | 0.0727  | 0.0042 | 0.74142 | 459   | 18 | 452.6 | 25 | 456  | 21 | 452.6  | 25.0 | 1.4  | Single Age |
| 10SMB06-164 | 341   | 0.528 | 0.528  | 0.031 | 0.0685  | 0.0043 | 0.89688 | 429   | 21 | 427   | 26 | 449  | 17 | 427.0  | 26.0 | 0.5  | Single Age |
| 10SMB06-166 | 133.4 | 0.332 | 0.332  | 0.027 | 0.04575 | 0.0039 | 0.63595 | 290.8 | 20 | 288.3 | 24 | 302  | 21 | 288.3  | 24.0 | 0.9  | Single Age |
| 10SMB06-167 | 577   | 0.506 | 0.506  | 0.028 | 0.0664  | 0.0041 | 0.81192 | 415.5 | 19 | 414.6 | 25 | 423  | 21 | 414.6  | 25.0 | 0.2  | Single Age |
| 10SMB06-168 | 228   | 0.390 | 0.39   | 0.027 | 0.0526  | 0.0039 | 0.80959 | 334.2 | 19 | 330.4 | 24 | 342  | 12 | 330.4  | 24.0 | 1.1  | Single Age |
| 10SMB06-169 | 358   | 0.953 | 0.953  | 0.059 | 0.1081  | 0.0061 | 0.96448 | 673   | 32 | 663   | 36 | 693  | 31 | 663.0  | 36.0 | 1.5  | Single Age |
| 10SMB06-170 | 699   | 0.535 | 0.535  | 0.034 | 0.0648  | 0.0045 | 0.95532 | 435   | 22 | 404   | 27 | 598  | 12 | 404.0  | 27.0 | 7.1  | Single Age |
| 10SMB06-171 | 496   | 0.352 | 0.352  | 0.028 | 0.0489  | 0.0041 | 0.72759 | 305.5 | 21 | 307.8 | 25 | 299  | 28 | 307.8  | 25.0 | -0.8 | Single Age |
| 10SMB06-172 | 418   | 0.350 | 0.3497 | 0.027 | 0.04832 | 0.004  | 0.70082 | 304.2 | 20 | 304.8 | 25 | 298  | 19 | 304.8  | 25.0 | -0.2 | Single Age |
| 10SMB06-173 | 337   | 0.342 | 0.3424 | 0.027 | 0.04778 | 0.004  | 0.7724  | 298.7 | 20 | 300.9 | 24 | 299  | 16 | 300.9  | 24.0 | -0.7 | Single Age |
| 10SMB06-174 | 175   | 0.757 | 0.757  | 0.034 | 0.0911  | 0.0045 | 0.90516 | 572   | 20 | 562   | 27 | 603  | 15 | 562.0  | 27.0 | 1.7  | Single Age |
| 10SMB06-175 | 207   | 0.535 | 0.535  | 0.038 | 0.0678  | 0.005  | 0.92935 | 431   | 25 | 423   | 30 | 467  | 25 | 423.0  | 30.0 | 1.9  | Single Age |
| 10SMB06-176 | 217   | 0.338 | 0.3379 | 0.027 | 0.0465  | 0.004  | 0.71457 | 295.9 | 20 | 293.9 | 24 | 293  | 20 | 293.9  | 24.0 | 0.7  | Single Age |
| 10SMB06-178 | 512   | 0.504 | 0.504  | 0.031 | 0.0587  | 0.0042 | 0.8436  | 414   | 21 | 367.8 | 25 | 682  | 29 | DISC   | DISC | 11.2 | Single Age |
| 10SMB06-179 | 315   | 0.526 | 0.526  | 0.028 | 0.0674  | 0.0042 | 0.78879 | 428.8 | 19 | 420.3 | 25 | 478  | 15 | 420.3  | 25.0 | 2.0  | Single Age |
| 10SMB06-180 | 210   | 0.392 | 0.392  | 0.028 | 0.0533  | 0.0042 | 0.69896 | 335.9 | 21 | 334.8 | 25 | 348  | 26 | 334.8  | 25.0 | 0.3  | Single Age |

| Sample Name:                            |       | 10SMB07 |  |                 |          |         |          |         |       |                    |       |          |        |          |          |          |              |              |  |  |  |  |  |
|-----------------------------------------|-------|---------|--|-----------------|----------|---------|----------|---------|-------|--------------------|-------|----------|--------|----------|----------|----------|--------------|--------------|--|--|--|--|--|
| Upper Freshwater Molasse (18 Ma ± 3 Ma) |       |         |  | Isotopic Ratios |          |         |          |         |       | Apparent Ages (Ma) |       |          |        |          |          |          |              |              |  |  |  |  |  |
|                                         | U     | U/Th    |  | 207Pb           | 2σ error | 206Pb   | 2σ error | Error   | 207Pb | 2σ error           | 206Pb | 2σ error | 207Pb  | 2σ error | Best age | 2σ error | Discordance* | Rim, Core or |  |  |  |  |  |
| Grain #                                 | (ppm) |         |  | 235U            | (abs.)   | 238U    | (abs.)   | Corr.   | 235U  | (Ma)               | 238U  | (Ma)     | 206Pb  | (Ma)     |          | (Ma)     | (Ma)         | %            |  |  |  |  |  |
| 10SMB07-1                               | 315   | 0.3069  |  | 0.3069          | 0.015    | 0.04319 | 0.0015   | 0.60807 | 271.8 | 11                 | 272.6 | 9.2      | 296    | 11       | 272.6    | 9.2      | -0.3         | Single Age   |  |  |  |  |  |
| 10SMB07-2                               | 385   | 0.3165  |  | 0.3165          | 0.015    | 0.04256 | 0.0015   | 0.24399 | 279.2 | 11                 | 268.7 | 9.1      | 394    | 19       | 268.7    | 9.1      | 3.8          | Single Age   |  |  |  |  |  |
| 10SMB07-3                               | 227   | 0.4232  |  | 0.4232          | 0.016    | 0.0565  | 0.0018   | 0.7337  | 358.2 | 11                 | 354.2 | 11       | 354    | 17       | 354.2    | 11       | 1.1          | Single Age   |  |  |  |  |  |
| 10SMB07-4                               | 472   | 0.5576  |  | 0.5576          | 0.016    | 0.07182 | 0.0017   | 0.76846 | 449.8 | 10                 | 447.1 | 10       | 459    | 10       | 447.1    | 10       | 0.6          | Single Age   |  |  |  |  |  |
| 10SMB07-5                               | 148   | 0.504   |  | 0.504           | 0.019    | 0.0496  | 0.0017   | 0.69635 | 414.1 | 13                 | 311.9 | 11       | 1016   | 31       | DISC     | DISC     | 24.7         | Single Age   |  |  |  |  |  |
| 10SMB07-7                               | 746   | 0.3344  |  | 0.3344          | 0.015    | 0.04643 | 0.0015   | 0.77353 | 292.8 | 11                 | 292.6 | 9.3      | 303.5  | 8.1      | 292.6    | 9.3      | 0.1          | Single Age   |  |  |  |  |  |
| 10SMB07-8                               | 305   | 0.611   |  | 0.611           | 0.025    | 0.0786  | 0.0023   | 0.78321 | 484   | 16                 | 488   | 14       | 476    | 28       | 488      | 14       | -0.8         | Single Age   |  |  |  |  |  |
| 10SMB07-9                               | 609   | 0.3108  |  | 0.3108          | 0.015    | 0.04379 | 0.0015   | 0.69792 | 274.7 | 11                 | 276.3 | 9.3      | 309    | 12       | 276.3    | 9.3      | -0.6         | Single Age   |  |  |  |  |  |
| 10SMB07-10                              | 997   | 0.3174  |  | 0.3174          | 0.015    | 0.04465 | 0.0017   | 0.88017 | 279.9 | 12                 | 281.6 | 10       | 289    | 12       | 281.6    | 10       | -0.6         | Single Age   |  |  |  |  |  |
| 10SMB07-12                              | 294   | 0.5904  |  | 0.5904          | 0.017    | 0.075   | 0.0018   | 0.7998  | 471   | 11                 | 465.9 | 11       | 491    | 11       | 465.9    | 11       | 1.1          | Single Age   |  |  |  |  |  |
| 10SMB07-13                              | 205   | 0.3343  |  | 0.3343          | 0.015    | 0.04588 | 0.0015   | 0.60547 | 292.8 | 12                 | 289.1 | 9.4      | 318    | 14       | 289.1    | 9.4      | 1.3          | Single Age   |  |  |  |  |  |
| 10SMB07-14                              | 85.6  | 0.3216  |  | 0.3216          | 0.016    | 0.04436 | 0.0015   | 0.52846 | 283.6 | 12                 | 279.8 | 9.5      | 330    | 20       | 279.8    | 9.5      | 1.3          | Single Age   |  |  |  |  |  |
| 10SMB07-15                              | 449   | 0.3494  |  | 0.3494          | 0.016    | 0.04834 | 0.0017   | 0.82686 | 304.2 | 12                 | 304.3 | 10       | 307    | 14       | 304.3    | 10       | 0.0          | Single Age   |  |  |  |  |  |
| 10SMB07-17                              | 250.4 | 4.92    |  | 4.92            | 0.85     | 0.249   | 0.034    | 0.98876 | 1610  | 180                | 1400  | 180      | 2130   | 110      | DISC     | DISC     | 34.3         | Single Age   |  |  |  |  |  |
| 10SMB07-19                              | 214.4 | 1.583   |  | 1.583           | 0.02     | 0.1615  | 0.002    | 0.7361  | 963.2 | 7.8                | 964.8 | 11       | 975.7  | 8.5      | 975.7    | 8.5      | 1.1          | Single Age   |  |  |  |  |  |
| 10SMB07-20                              | 378   | 0.3146  |  | 0.3146          | 0.015    | 0.04388 | 0.0016   | 0.71463 | 277.7 | 12                 | 276.8 | 9.7      | 288    | 10       | 276.8    | 9.7      | 0.3          | Single Age   |  |  |  |  |  |
| 10SMB07-21                              | 591   | 0.4069  |  | 0.4069          | 0.016    | 0.05437 | 0.0016   | 0.69375 | 346.6 | 11                 | 341.3 | 9.9      | 383    | 10       | 341.3    | 9.9      | 1.5          | Single Age   |  |  |  |  |  |
| 10SMB07-22                              | 638   | 0.3105  |  | 0.3105          | 0.015    | 0.04319 | 0.0016   | 0.62781 | 274.9 | 12                 | 272.6 | 9.7      | 323    | 13       | 272.6    | 9.7      | 0.8          | Single Age   |  |  |  |  |  |
| 10SMB07-23                              | 156   | 5.32    |  | 5.32            | 0.23     | 0.328   | 0.013    | 0.98145 | 1877  | 35                 | 1828  | 63       | 1922   | 13       | 1922     | 13       | 4.9          | Single Age   |  |  |  |  |  |
| 10SMB07-24                              | 226.9 | 0.3333  |  | 0.3333          | 0.016    | 0.04645 | 0.0016   | 0.60613 | 292   | 12                 | 292.7 | 10       | 283    | 15       | 292.7    | 10       | -0.2         | Single Age   |  |  |  |  |  |
| 10SMB07-25                              | 480   | 0.2996  |  | 0.2996          | 0.016    | 0.04176 | 0.0016   | 0.78366 | 266.6 | 13                 | 263.7 | 10       | 280    | 13       | 263.7    | 10       | 1.1          | Single Age   |  |  |  |  |  |
| 10SMB07-26                              | 44.6  | 1.184   |  | 1.184           | 0.066    | 0.1194  | 0.0022   | 0.68612 | 792   | 32                 | 727   | 13       | 937    | 89       | 727      | 13       | 8.2          | Single Age   |  |  |  |  |  |
| 10SMB07-27                              | 186   | 0.3371  |  | 0.3371          | 0.016    | 0.04641 | 0.0016   | 0.56679 | 294.9 | 12                 | 292.4 | 10       | 293    | 15       | 292.4    | 10       | 0.8          | Single Age   |  |  |  |  |  |
| 10SMB07-28                              | 649   | 0.34    |  | 0.34            | 0.016    | 0.04663 | 0.0016   | 0.72452 | 297.1 | 12                 | 293.8 | 9.9      | 303    | 12       | 293.8    | 9.9      | 1.1          | Single Age   |  |  |  |  |  |
| 10SMB07-33                              | 528   | 0.3332  |  | 0.3332          | 0.016    | 0.04572 | 0.0016   | 0.62679 | 292   | 12                 | 288.2 | 10       | 353    | 15       | 288.2    | 10       | 1.3          | Single Age   |  |  |  |  |  |
| 10SMB07-37                              | 221   | 0.342   |  | 0.342           | 0.016    | 0.04749 | 0.0016   | 0.47471 | 298.6 | 12                 | 299.1 | 10       | 291    | 13       | 299.1    | 10       | -0.2         | Single Age   |  |  |  |  |  |
| 10SMB07-38                              | 1028  | 0.3263  |  | 0.3263          | 0.016    | 0.04581 | 0.0017   | 0.79051 | 286.7 | 12                 | 288.7 | 10       | 297    | 11       | 288.7    | 10       | -0.7         | Single Age   |  |  |  |  |  |
| 10SMB07-40                              | 652   | 0.3584  |  | 0.3584          | 0.017    | 0.0446  | 0.0019   | 0.79572 | 310.9 | 13                 | 281.5 | 12       | 548    | 25       | 281.5    | 12       | 9.5          | Single Age   |  |  |  |  |  |
| 10SMB07-53                              | 160   | 0.3618  |  | 0.3618          | 0.018    | 0.04969 | 0.0017   | 0.46208 | 313.4 | 13                 | 312.6 | 11       | 339    | 19       | 312.6    | 11       | 0.3          | Single Age   |  |  |  |  |  |
| 10SMB07-64                              | 353   | 0.3334  |  | 0.3334          | 0.016    | 0.04623 | 0.0017   | 0.68399 | 292.1 | 13                 | 291.3 | 10       | 289    | 12       | 291.3    | 10       | 0.3          | Single Age   |  |  |  |  |  |
| 10SMB07-66                              | 1940  | 0.3305  |  | 0.3305          | 0.016    | 0.04596 | 0.0017   | 0.76067 | 289.9 | 13                 | 289.6 | 10       | 313    | 9.7      | 289.6    | 10       | 0.1          | Single Age   |  |  |  |  |  |
| 10SMB07-67                              | 449   | 0.4864  |  | 0.4864          | 0.018    | 0.04919 | 0.0017   | 0.45838 | 402.3 | 12                 | 309.5 | 10       | 982    | 17       | DISC     | DISC     | 23.1         | Single Age   |  |  |  |  |  |
| 10SMB07-68                              | 295   | 0.3372  |  | 0.3372          | 0.016    | 0.04667 | 0.0017   | 0.61938 | 295   | 12                 | 294   | 10       | 293    | 10       | 294      | 10       | 0.3          | Single Age   |  |  |  |  |  |
| 10SMB07-69                              | 1020  | 0.3444  |  | 0.3444          | 0.016    | 0.04756 | 0.0017   | 0.78352 | 300.4 | 12                 | 299.5 | 10       | 301    | 10       | 299.5    | 10       | 0.3          | Single Age   |  |  |  |  |  |
| 10SMB07-76                              | 579   | 0.3325  |  | 0.3325          | 0.017    | 0.04585 | 0.0017   | 0.75397 | 291.4 | 13                 | 289   | 10       | 317    | 10       | 289      | 10       | 0.8          | Single Age   |  |  |  |  |  |
| 10SMB07-80                              | 1000  | 0.392   |  | 0.392           | 0.017    | 0.05346 | 0.0018   | 0.79794 | 335.8 | 12                 | 335.7 | 11       | 355    | 10       | 335.7    | 11       | 0.0          | Single Age   |  |  |  |  |  |
| 10SMB07-84                              | 335   | 0.355   |  | 0.355           | 0.017    | 0.04881 | 0.0017   | 0.7021  | 308.4 | 12                 | 307.2 | 11       | 322    | 11       | 307.2    | 11       | 0.4          | Single Age   |  |  |  |  |  |
| 10SMB07-86                              | 90    | 0.929   |  | 0.929           | 0.019    | 0.10893 | 0.0019   | 0.38777 | 666.8 | 10                 | 666.5 | 11       | 663    | 13       | 666.5    | 11       | 0.0          | Single Age   |  |  |  |  |  |
| 10SMB07-88                              | 365   | 0.2828  |  | 0.2828          | 0.017    | 0.0397  | 0.0017   | 0.66806 | 252.8 | 13                 | 251   | 11       | 272    | 13       | 251      | 11       | 0.7          | Single Age   |  |  |  |  |  |
| 10SMB07-89                              | 275.7 | 0.529   |  | 0.529           | 0.021    | 0.0696  | 0.0024   | 0.89454 | 431   | 14                 | 434   | 14       | 440    | 12       | 434      | 14       | -0.7         | Single Age   |  |  |  |  |  |
| 10SMB07-91                              | 202   | 0.767   |  | 0.767           | 0.02     | 0.0959  | 0.0021   | 0.82651 | 577.8 | 12                 | 590.5 | 12       | 537    | 12       | 590.5    | 12       | -2.2         | Single Age   |  |  |  |  |  |
| 10SMB07-92                              | 858   | 0.3522  |  | 0.3522          | 0.017    | 0.04835 | 0.0017   | 0.68294 | 306.3 | 12                 | 304.4 | 10       | 327    | 11       | 304.4    | 10       | 0.6          | Single Age   |  |  |  |  |  |
| 10SMB07-95                              | 1540  | 0.408   |  | 0.408           | 0.021    | 0.0294  | 0.0026   | 0.82699 | 347.1 | 15                 | 187   | 16       | 1691   | 86       | DISC     | DISC     | 46.1         | Single Age   |  |  |  |  |  |
| 10SMB07-98                              | 201   | 0.4424  |  | 0.4424          | 0.017    | 0.05919 | 0.0018   | 0.61099 | 371.8 | 12                 | 370.7 | 11       | 375    | 13       | 370.7    | 11       | 0.3          | Single Age   |  |  |  |  |  |
| 10SMB07-99                              | 2010  | 0.2146  |  | 0.2146          | 0.019    | 0.0293  | 0.0021   | 0.97614 | 197   | 16                 | 186.1 | 13       | 345.1  | 9.3      | 186.1    | 13       | 5.5          | Single Age   |  |  |  |  |  |
| 10SMB07-102                             | 2260  | 0.427   |  | 0.427           | 0.045    | 0.0323  | 0.0023   | -0.9123 | 357   | 32                 | 205   | 14       | 1430   | 280      | DISC     | DISC     | 42.6         | Single Age   |  |  |  |  |  |
| 10SMB07-105                             | 1010  | 0.9594  |  | 0.9594          | 0.019    | 0.112   | 0.0021   | 0.86663 | 683.4 | 10                 | 684   | 12       | 673.2  | 7        | 684      | 12       | -0.1         | Single Age   |  |  |  |  |  |
| 10SMB07-108                             | 1123  | 0.3286  |  | 0.3286          | 0.017    | 0.04498 | 0.0018   | 0.86007 | 288.4 | 13                 | 283.6 | 11       | 339    | 11       | 283.6    | 11       | 1.7          | Single Age   |  |  |  |  |  |
| 10SMB07-110                             | 1610  | 0.3429  |  | 0.3429          | 0.017    | 0.04768 | 0.0018   | 0.86951 | 299.3 | 13                 | 300.2 | 11       | 305.7  | 9.5      | 300.2    | 11       | -0.3         | Single Age   |  |  |  |  |  |
| 10SMB07-116                             | 10590 | 0.3625  |  | 0.3625          | 0.017    | 0.04892 | 0.0017   | 0.76102 | 314.1 | 12                 | 307.9 | 10       | 360    | 7.5      | 307.9    | 10       | 2.0          | Single Age   |  |  |  |  |  |
| 10SMB07-118                             | 1330  | 0.3578  |  | 0.3578          | 0.017    | 0.04952 | 0.0018   | 0.91208 | 310.5 | 13                 | 311.6 | 11       | 297.8  | 8        | 311.6    | 11       | -0.4         | Single Age   |  |  |  |  |  |
| 10SMB07-120                             | 1403  | 0.3151  |  | 0.3151          | 0.017    | 0.04425 | 0.0018   | 0.88152 | 278.7 | 14                 | 279.1 | 11       | 306.3  | 8.7      | 279.1    | 11       | -0.1         | Single Age   |  |  |  |  |  |
| 10SMB07-121                             | 320   | 11.02   |  | 11.02           | 0.35     | 0.438   | 0.012    | 0.95406 | 2529  | 28                 | 2339  | 55       | 2688.2 | 9.8      | 2688.2   | 9.8      | 13.0         | Single Age   |  |  |  |  |  |
| 10SMB07-122                             | 1097  | 0.3377  |  | 0.3377          | 0.017    | 0.04658 | 0.0017   | 0.7399  | 295.8 | 12                 | 293.5 | 11       | 323    | 10       | 293.5    | 11       | 0.8          | Single Age   |  |  |  |  |  |
| 10SMB07-128                             | 247   | 0.3573  |  | 0.3573          | 0.018    | 0.04915 | 0.0018   | 0.58974 | 310.1 | 13                 | 309.3 | 11       | 330    | 21       | 309.3    | 11       | 0.3          | Single Age   |  |  |  |  |  |
| 10SMB07-130                             | 281   | 0.4969  |  | 0.4969          | 0.019    | 0.055   | 0.002    | 0.50495 | 410.6 | 12                 | 345.4 | 12       | 782    | 34       | DISC     | DISC     | 15.9         | Single Age   |  |  |  |  |  |
| 10SMB07-136                             | 11700 | 0.787   |  | 0.787           | 0.025    | 0.0984  | 0.0031   | 0.902   | 590.9 | 13                 | 605   | 18       | 658    | 22       | 605      | 18       | -2.4         | Single Age   |  |  |  |  |  |
| 10SMB07-140                             | 1670  | 0.3503  |  |                 |          |         |          |         |       |                    |       |          |        |          |          |          |              |              |  |  |  |  |  |

# Bregenz Section

| Sample Name:                         |         | 10SMB09 |          | Isotopic Ratios |          |        |          |          |       |          | Apparent Ages (Ma) |          |          |          |              |              |            |  |  |  |  |
|--------------------------------------|---------|---------|----------|-----------------|----------|--------|----------|----------|-------|----------|--------------------|----------|----------|----------|--------------|--------------|------------|--|--|--|--|
| Upper Freshwater Molasse (15 ± 2 Ma) |         | U       |          |                 |          |        |          |          |       |          |                    |          |          |          |              |              |            |  |  |  |  |
| Grain #                              | U (ppm) | 207Pb   | 2σ error | 206Pb           | 2σ error | Error  | 207Pb    | 2σ error | 206Pb | 2σ error | 207Pb              | 2σ error | Best age | 2σ error | Discordance* | Rim, Core or |            |  |  |  |  |
|                                      |         | 235U    | (abs.)   | 238U            | (abs.)   | Corr.  | 235U     | (Ma)     | 238U  | (Ma)     | 206Pb              | (Ma)     | (Ma)     | (Ma)     | %            | Single Age   |            |  |  |  |  |
| SMB09_1.FIN2                         | 278     | 1       | 0.3529   | 0.0049          | 0.04778  | 0.0006 | 0.57007  | 306.8    | 3.7   | 301.3    | 3.4                | 344      | 27       | 301.3    | 3.4          | 1.8          | Single Age |  |  |  |  |
| SMB09_2.FIN2                         | 154     | 1.62    | 0.385    | 0.0087          | 0.05205  | 0.0007 | 0.45752  | 330.3    | 6.4   | 327.1    | 4.5                | 339      | 47       | 327.1    | 4.5          | 1.0          | Single Age |  |  |  |  |
| SMB09_3.FIN2                         | 90.9    | 0.626   | 0.2917   | 0.0085          | 0.04079  | 0.0008 | 0.4107   | 260.8    | 6.4   | 257.7    | 4.6                | 252      | 59       | 257.7    | 4.6          | 1.2          | Single Age |  |  |  |  |
| SMB09_6.FIN2                         | 61.5    | 0.8     | 0.3644   | 0.009           | 0.04874  | 0.0008 | 0.080002 | 316.4    | 6.9   | 306.7    | 4.7                | 351      | 75       | 306.7    | 4.7          | 3.1          | Single Age |  |  |  |  |
| SMB09_7.FIN2                         | 201     | 1.103   | 0.3445   | 0.0052          | 0.04723  | 0.0005 | 0.3136   | 300.4    | 3.9   | 297.9    | 3.1                | 320      | 32       | 297.9    | 3.1          | 0.8          | Single Age |  |  |  |  |
| SMB09_8.FIN2                         | 419     | 1.035   | 0.3483   | 0.0065          | 0.04765  | 0.0007 | 0.25799  | 303.4    | 4.9   | 300.1    | 4.2                | 319      | 42       | 300.1    | 4.2          | 1.1          | Single Age |  |  |  |  |
| SMB09_9.FIN2                         | 268.5   | 0.933   | 0.709    | 0.012           | 0.0866   | 0.0017 | 0.82493  | 544.1    | 6.9   | 535.6    | 9.9                | 569      | 26       | 535.6    | 9.9          | 1.6          | Single Age |  |  |  |  |
| SMB09_11.FIN2                        | 695     | 1.5     | 0.3842   | 0.0037          | 0.05117  | 0.0006 | 0.67871  | 330.1    | 2.7   | 321.7    | 3.5                | 390      | 19       | 321.7    | 3.5          | 2.5          | Single Age |  |  |  |  |
| SMB09_12.FIN2                        | 325     | 2.07    | 0.36     | 0.0056          | 0.04907  | 0.0005 | 0.2491   | 312.1    | 4.2   | 308.8    | 2.9                | 341      | 38       | 308.8    | 2.9          | 1.1          | Single Age |  |  |  |  |
| SMB09_13.FIN2                        | 26.79   | 0.657   | 1.01     | 0.11            | 0.1095   | 0.0038 | 0.086596 | 699      | 45    | 670      | 22                 | 780      | 150      | 670      | 22           | 4.1          | Single Age |  |  |  |  |
| SMB09_14.FIN2                        | 120.7   | 0.769   | 0.7525   | 0.0084          | 0.09171  | 0.001  | 0.42762  | 569.5    | 4.9   | 565.6    | 5.9                | 576      | 25       | 565.6    | 5.9          | 0.7          | Single Age |  |  |  |  |
| SMB09_15.FIN2                        | 415.2   | 0.617   | 0.3744   | 0.0057          | 0.05006  | 0.0007 | 0.62937  | 322.7    | 4.2   | 314.9    | 4                  | 389      | 29       | 314.9    | 4            | 2.4          | Single Age |  |  |  |  |
| SMB09_16.FIN2                        | 577     | 1.861   | 0.3105   | 0.0061          | 0.04219  | 0.0007 | 0.86652  | 274.5    | 4.7   | 266.4    | 4.4                | 355      | 20       | 266.4    | 4.4          | 3.0          | Rim        |  |  |  |  |
| SMB09_16.FIN2                        | 250.5   | 3.318   | 0.3453   | 0.0061          | 0.0472   | 0.0008 | 0.46342  | 301.1    | 4.6   | 297.3    | 4.8                | 307      | 40       | 297.3    | 4.8          | 1.3          | Core       |  |  |  |  |
| SMB09_17.FIN2                        | 252     | 3.36    | 0.5485   | 0.0067          | 0.07152  | 0.0007 | 0.58373  | 443.9    | 4.4   | 445.3    | 4.2                | 459      | 22       | 445.3    | 4.2          | 0.3          | Single Age |  |  |  |  |
| SMB09_18.FIN2                        | 987     | 15.7    | 0.3794   | 0.0079          | 0.04953  | 0.0009 | 0.42741  | 326.5    | 5.8   | 311.6    | 5.7                | 453      | 42       | 311.6    | 5.7          | 4.6          | Rim        |  |  |  |  |
| SMB09_18.FIN2                        | 110.9   | 2.26    | 0.543    | 0.011           | 0.0691   | 0.0012 | 0.28171  | 440.5    | 7.5   | 430.4    | 7.3                | 540      | 60       | 430.4    | 7.3          | 2.3          | Core       |  |  |  |  |
| SMB09_20.FIN2                        | 190     | 46      | 1.591    | 0.041           | 0.158    | 0.0065 | 0.64684  | 966      | 16    | 945      | 36                 | 991      | 48       | 991      | 48           | 4.6          | Rim        |  |  |  |  |
| SMB09_20.FIN2                        | 45.37   | 1.165   | 2.154    | 0.041           | 0.1977   | 0.0033 | 0.48279  | 1166     | 13    | 1163     | 18                 | 1198     | 33       | 1198     | 33           | 2.9          | Core       |  |  |  |  |
| SMB09_21.FIN2                        | 409     | 2.843   | 0.803    | 0.017           | 0.078    | 0.0017 | 0.71692  | 598      | 9.5   | 484      | 10                 | 1042     | 35       | DISC     | DISC         | 19.1         | Single Age |  |  |  |  |
| SMB09_22.FIN2                        | 182     | 1.539   | 0.3783   | 0.009           | 0.05089  | 0.0008 | 0.20123  | 325.5    | 6.6   | 320      | 5                  | 365      | 52       | 320      | 5            | 1.7          | Single Age |  |  |  |  |
| SMB09_23.FIN2                        | 434.3   | 2.057   | 0.3906   | 0.0063          | 0.05315  | 0.0008 | 0.16277  | 334.6    | 4.6   | 333.8    | 4.6                | 340      | 33       | 333.8    | 4.6          | 0.2          | Single Age |  |  |  |  |
| SMB09_25.FIN2                        | 242     | 4.03    | 0.537    | 0.0058          | 0.07025  | 0.0006 | 0.47369  | 436.3    | 3.8   | 438.1    | 3.8                | 436      | 24       | 438.1    | 3.8          | 0.4          | Single Age |  |  |  |  |
| SMB09_27.FIN2                        | 287     | 1.603   | 0.3682   | 0.0071          | 0.04941  | 0.0006 | 0.38725  | 318.2    | 5.3   | 310.9    | 3.4                | 373      | 41       | 310.9    | 3.4          | 2.3          | Single Age |  |  |  |  |
| SMB09_30.FIN2                        | 237.1   | 2       | 0.559    | 0.048           | 0.0599   | 0.0027 | 0.2608   | 450      | 31    | 375      | 16                 | 860      | 200      | DISC     | DISC         | 16.7         | Rim        |  |  |  |  |
| SMB09_30.FIN2                        | 115     | 0.692   | 12.22    | 0.22            | 0.355    | 0.0074 | 0.77461  | 2626     | 19    | 1958     | 35                 | 3179     | 18       | DISC     | DISC         | 38.4         | Core       |  |  |  |  |
| SMB09_31.FIN2                        | 163.2   | 3.5     | 0.494    | 0.012           | 0.0645   | 0.0011 | 0.57568  | 407.1    | 8.1   | 402.8    | 6.9                | 434      | 39       | 402.8    | 6.9          | 1.1          | Single Age |  |  |  |  |
| SMB09_36.FIN2                        | 189     | 0.973   | 0.728    | 0.016           | 0.0871   | 0.0015 | 0.48687  | 555      | 9.2   | 538.1    | 8.9                | 620      | 40       | 538.1    | 8.9          | 3.0          | Single Age |  |  |  |  |
| SMB09_37.FIN2                        | 145.9   | 1.755   | 6.05     | 0.11            | 0.3554   | 0.0058 | 0.74663  | 1986     | 17    | 1960     | 27                 | 2030     | 24       | 2030     | 24           | 3.4          | Single Age |  |  |  |  |
| SMB09_39.FIN2                        | 159     | 1.299   | 0.319    | 0.013           | 0.042    | 0.0014 | 0.00267  | 281      | 10    | 264.9    | 8.5                | 420      | 120      | 264.9    | 8.5          | 5.7          | Rim        |  |  |  |  |
| SMB09_39.FIN2                        | 95      | 2.65    | 0.815    | 0.017           | 0.0984   | 0.0017 | 0.50228  | 604.7    | 9.6   | 605      | 10                 | 638      | 44       | 605      | 10           | 0.0          | Core       |  |  |  |  |
| SMB09_40.FIN2                        | 399     | 2.53    | 0.3951   | 0.0061          | 0.05321  | 0.0006 | 0.088685 | 338      | 4.4   | 334.2    | 3.5                | 365      | 41       | 334.2    | 3.5          | 1.1          | Single Age |  |  |  |  |
| SMB09_41.FIN2                        | 429     | 1.623   | 0.3985   | 0.0065          | 0.0531   | 0.0008 | 0.62064  | 340.5    | 4.8   | 333.5    | 5                  | 382      | 26       | 333.5    | 5            | 2.1          | Single Age |  |  |  |  |
| SMB09_42.FIN2                        | 59.2    | 0.6029  | 1.799    | 0.028           | 0.1752   | 0.0024 | 0.20569  | 1044     | 10    | 1041     | 13                 | 1040     | 29       | 1040     | 29           | 0.1          | Single Age |  |  |  |  |
| SMB09_43.FIN2                        | 4440    | 1.87    | 0.3388   | 0.0027          | 0.04532  | 0.0004 | 0.74969  | 296.2    | 2     | 285.7    | 2.5                | 370      | 12       | 285.7    | 2.5          | 3.5          | Single Age |  |  |  |  |
| SMB09_46.FIN2                        | 74.6    | 0.632   | 0.3848   | 0.0087          | 0.05115  | 0.0007 | 0.20173  | 330.2    | 6.4   | 321.6    | 4.5                | 377      | 58       | 321.6    | 4.5          | 2.6          | Single Age |  |  |  |  |
| SMB09_47.FIN2                        | 246     | 1.9     | 0.7131   | 0.0097          | 0.0879   | 0.0011 | 0.60959  | 546.4    | 5.8   | 542.9    | 6.7                | 561      | 26       | 542.9    | 6.7          | 0.6          | Single Age |  |  |  |  |
| SMB09_49.FIN2                        | 128.5   | 1.119   | 0.786    | 0.011           | 0.0949   | 0.0011 | 0.37528  | 588.9    | 6.5   | 584.6    | 6.4                | 586      | 33       | 584.6    | 6.4          | 0.7          | Single Age |  |  |  |  |
| SMB09_50.FIN2                        | 596     | 2.033   | 1.668    | 0.021           | 0.1641   | 0.0021 | 0.45974  | 996.2    | 7.8   | 979      | 11                 | 1025     | 22       | 1025     | 22           | 4.5          | Single Age |  |  |  |  |
| SMB09_52.FIN2                        | 582     | 5.86    | 0.3858   | 0.0047          | 0.05199  | 0.0005 | 0.22341  | 331.2    | 3.5   | 326.7    | 3.2                | 360      | 32       | 326.7    | 3.2          | 1.4          | Single Age |  |  |  |  |
| SMB09_57.FIN2                        | 299     | 2.67    | 4.429    | 0.047           | 0.3009   | 0.0036 | 0.7661   | 1717.3   | 8.7   | 1695     | 18                 | 1742     | 13       | 1742     | 13           | 2.7          | Single Age |  |  |  |  |
| SMB09_58.FIN2                        | 169.2   | 14.58   | 0.3938   | 0.0055          | 0.05326  | 0.0007 | 0.22643  | 337      | 4     | 334.5    | 4.5                | 344      | 34       | 334.5    | 4.5          | 0.7          | Single Age |  |  |  |  |
| SMB09_59.FIN2                        | 91      | 0.821   | 0.38     | 0.014           | 0.0523   | 0.001  | 0.31804  | 327      | 10    | 328.5    | 6.2                | 318      | 68       | 328.5    | 6.2          | 0.5          | Single Age |  |  |  |  |
| SMB09_62.FIN2                        | 132.8   | 0.837   | 0.5509   | 0.0088          | 0.06982  | 0.0009 | 0.41421  | 445.4    | 5.8   | 435      | 5.5                | 489      | 33       | 435      | 5.5          | 2.3          | Single Age |  |  |  |  |
| SMB09_63.FIN2                        | 295     | 3.3     | 0.4181   | 0.0069          | 0.05628  | 0.0007 | 0.62359  | 354.5    | 5     | 352.9    | 4                  | 352      | 30       | 352.9    | 4            | 0.5          | Single Age |  |  |  |  |
| SMB09_65.FIN2                        | 148     | 1.715   | 2.041    | 0.017           | 0.1906   | 0.0013 | 0.43455  | 1128.9   | 5.8   | 1124.6   | 6.9                | 1128     | 17       | 1128     | 17           | 0.3          | Single Age |  |  |  |  |
| SMB09_69.FIN2                        | 338     | 1.307   | 0.3755   | 0.0051          | 0.05124  | 0.0004 | 0.47472  | 324.1    | 3.7   | 322.1    | 2.6                | 326      | 26       | 322.1    | 2.6          | 0.6          | Single Age |  |  |  |  |
| SMB09_70.FIN2                        | 46.6    | 1.447   | 2.281    | 0.045           | 0.1959   | 0.0028 | 0.30648  | 1206     | 14    | 1153     | 15                 | 1276     | 43       | 1276     | 43           | 9.6          | Single Age |  |  |  |  |
| SMB09_73.FIN2                        | 835     | 0.0082  | 0.3348   | 0.0029          | 0.04534  | 0.0005 | 0.65803  | 293.2    | 2.2   | 285.8    | 3.1                | 342      | 20       | 285.8    | 3.1          | 2.5          | Single Age |  |  |  |  |
| SMB09_74.FIN2                        | 193.1   | 3.88    | 0.686    | 0.013           | 0.083    | 0.0011 | 0.44572  | 530.1    | 7.9   | 513.8    | 6.7                | 597      | 35       | 513.8    | 6.7          | 3.1          | Single Age |  |  |  |  |
| SMB09_75.FIN2                        | 533     | 1.89    | 0.3789   | 0.0032          | 0.0518   | 0.0004 | 0.35564  | 326.2    | 2.4   | 325.5    | 2.3                | 331      | 21       | 325.5    | 2.3          | 0.2          | Single Age |  |  |  |  |
| SMB09_76.FIN2                        | 80.2    | 1.262   | 1.642    | 0.035           | 0.1629   | 0.0025 | 0.20626  | 986      | 14    | 973      | 14                 | 1012     | 43       | 1012     | 43           | 3.9          | Single Age |  |  |  |  |
| SMB09_77.FIN2                        | 692     | 5.11    | 0.4299   | 0.0057          | 0.05272  | 0.0008 | 0.055042 | 363.1    | 4.1   | 331.2    | 4.9                | 585      | 56       | 331.2    | 4.9          | 8.8          | Single Age |  |  |  |  |
| SMB09_78.FIN2                        | 62.6    | 1.311   | 0.864    | 0.022           | 0.1021   | 0.0012 | 0.095614 | 634      | 12    | 626.7    | 7.1                | 621      | 55       | 626.7    | 7.1          | 1.2          | Single Age |  |  |  |  |
| SMB09_79.FIN2                        | 250     | 11.39   | 0.4082   | 0.0066          | 0.05475  | 0.0005 | 0.40092  | 347.4    | 4.7   | 343.6    | 3                  | 369      | 34       | 343.6    | 3            | 1.1          | Single Age |  |  |  |  |
| SMB09_80.FIN2                        | 51.48   | 1.534   | 0.662    | 0.051           | 0.0508   | 0.0018 | 0.11943  | 522      | 33    | 319      | 11                 | 1530     | 160      | DISC     | DISC         | 38.9         | Single Age |  |  |  |  |
| SMB09_81.FIN2                        | 202     | 1.65    | 0.364    | 0.0052          | 0.05     | 0.0008 | 0.181    | 315.1    | 3.8   | 314.5    | 4.8                | 318      | 48       | 314.5    | 4.8          | 0.2          | Single Age |  |  |  |  |
| SMB09_82.FIN2                        | 282     | 2.77    | 0.371    | 0.0042          | 0.05085  | 0.0006 | 0.53798  | 320.3    | 3.1   | 319.7    | 3.9                | 334      | 27       | 319.7    | 3.9          | 0.2          | Single Age |  |  |  |  |
| SMB09_84.FIN2                        | 233     | 6.22    | 0.4125   | 0.0094          | 0.0556   | 0.0011 | 0.56924  |          |       |          |                    |          |          |          |              |              |            |  |  |  |  |

|            | U     | U/Th   | 207Pb  | 2σ error | 206Pb   | 2σ error | Error   | 207Pb  | 2σ error | 206Pb | 2σ error | 207Pb  | 2σ error | Best age | 2σ error | Discordance* | Rim, Core or |
|------------|-------|--------|--------|----------|---------|----------|---------|--------|----------|-------|----------|--------|----------|----------|----------|--------------|--------------|
| Grain #    | (ppm) |        | 235U   | (abs.)   | 238U    | (abs.)   | Corr.   | 235U   | (Ma)     | 238U  | (Ma)     | 206Pb  | (Ma)     | (Ma)     | (Ma)     | %            | Single Age   |
| 10SMB10-1  | 323   | 0.3276 | 0.3276 | 0.046    | 0.0455  | 0.0052   | 0.56195 | 288.1  | 34       | 286.8 | 32       | 297    | 17       | DISC     | DISC     | 0.5          | Single Age   |
| 10SMB10-2  | 134.9 | 0.568  | 0.568  | 0.047    | 0.07274 | 0.0052   | 0.50574 | 456.5  | 30       | 452.6 | 32       | 478    | 15       | 452.6    | 32       | 0.9          | Single Age   |
| 10SMB10-3  | 151.8 | 0.3661 | 0.3661 | 0.047    | 0.04619 | 0.0052   | 0.38602 | 316.6  | 35       | 291   | 32       | 485    | 30       | DISC     | DISC     | 8.1          | Single Age   |
| 10SMB10-4  | 326   | 0.3596 | 0.3596 | 0.047    | 0.04753 | 0.0052   | 0.20074 | 311.7  | 35       | 299.3 | 32       | 392    | 36       | DISC     | DISC     | 4.0          | Single Age   |
| 10SMB10-5  | 287   | 0.3454 | 0.3454 | 0.046    | 0.0477  | 0.0052   | 0.62467 | 301.1  | 35       | 300.3 | 32       | 310    | 15       | DISC     | DISC     | 0.3          | Single Age   |
| 10SMB10-6  | 165   | 0.3448 | 0.3448 | 0.046    | 0.0472  | 0.0052   | 0.77149 | 300.6  | 35       | 297.3 | 32       | 336    | 17       | DISC     | DISC     | 1.1          | Single Age   |
| 10SMB10-7  | 360   | 0.3826 | 0.3826 | 0.047    | 0.05053 | 0.0053   | 0.77193 | 328.7  | 34       | 317.7 | 32       | 410    | 21       | DISC     | DISC     | 3.3          | Single Age   |
| 10SMB10-8  | 227   | 0.3423 | 0.3423 | 0.046    | 0.04715 | 0.0053   | 0.60824 | 298.8  | 35       | 297   | 32       | 310    | 18       | DISC     | DISC     | 0.6          | Single Age   |
| 10SMB10-9  | 219   | 0.5402 | 0.5402 | 0.046    | 0.0696  | 0.0053   | 0.75883 | 438.4  | 31       | 433.8 | 32       | 462    | 14       | 433.8    | 32       | 1.0          | Single Age   |
| 10SMB10-10 | 666   | 0.766  | 0.766  | 0.048    | 0.094   | 0.0057   | 0.80905 | 577.3  | 28       | 579   | 33       | 601    | 12       | 579      | 33       | -0.3         | Single Age   |
| 10SMB10-11 | 193.9 | 3.982  | 3.982  | 0.07     | 0.2811  | 0.0064   | 0.80599 | 1632   | 15       | 1597  | 32       | 1672   | 10       | 1672     | 10       | 4.5          | Single Age   |
| 10SMB10-12 | 361.7 | 1.033  | 1.033  | 0.048    | 0.1124  | 0.0055   | 0.6961  | 720    | 24       | 686   | 32       | 815    | 15       | 686      | 32       | 4.7          | Single Age   |
| 10SMB10-13 | 442   | 0.3368 | 0.3368 | 0.046    | 0.04615 | 0.0053   | 0.44643 | 294.7  | 35       | 290.8 | 33       | 342    | 23       | DISC     | DISC     | 1.3          | Single Age   |
| 10SMB10-14 | 723   | 0.3422 | 0.3422 | 0.048    | 0.04758 | 0.0054   | 0.65948 | 298.8  | 36       | 299.6 | 33       | 302    | 13       | DISC     | DISC     | -0.3         | Single Age   |
| 10SMB10-15 | 401   | 0.3777 | 0.3777 | 0.05     | 0.04496 | 0.0056   | 0.66936 | 325.2  | 37       | 283.5 | 35       | 620    | 18       | DISC     | DISC     | 12.8         | Single Age   |
| 10SMB10-16 | 135.1 | 0.5735 | 0.5735 | 0.051    | 0.07353 | 0.0057   | 0.61362 | 460.1  | 33       | 457.4 | 34       | 472    | 16       | 457.4    | 34       | 0.6          | Single Age   |
| 10SMB10-17 | 502.9 | 0.3194 | 0.3194 | 0.052    | 0.04408 | 0.0058   | 0.76297 | 281.4  | 40       | 278   | 36       | 294    | 14       | DISC     | DISC     | 1.2          | Single Age   |
| 10SMB10-18 | 157   | 0.5789 | 0.5789 | 0.052    | 0.07416 | 0.0058   | 0.56524 | 463.6  | 33       | 461.1 | 35       | 462    | 12       | 461.1    | 35       | 0.5          | Single Age   |
| 10SMB10-19 | 149   | 0.3852 | 0.3852 | 0.05     | 0.0523  | 0.0057   | 0.7512  | 330.7  | 37       | 328.6 | 35       | 329    | 16       | DISC     | DISC     | 0.6          | Single Age   |
| 10SMB10-20 | 336   | 0.3864 | 0.3864 | 0.049    | 0.05047 | 0.0056   | 0.67483 | 331.7  | 36       | 317.4 | 35       | 398    | 14       | DISC     | DISC     | 4.3          | Single Age   |
| 10SMB10-21 | 522   | 0.3632 | 0.3632 | 0.047    | 0.04754 | 0.0053   | 0.36926 | 314.5  | 35       | 299.4 | 32       | 426    | 25       | DISC     | DISC     | 4.8          | Single Age   |
| 10SMB10-22 | 318   | 0.3185 | 0.3185 | 0.047    | 0.04249 | 0.0052   | 0.58023 | 281.3  | 35       | 268.2 | 32       | 370    | 18       | DISC     | DISC     | 4.7          | Single Age   |
| 10SMB10-24 | 1525  | 0.2044 | 0.2044 | 0.046    | 0.02803 | 0.0052   | 0.84676 | 188.8  | 39       | 178.2 | 33       | 328    | 15       | DISC     | DISC     | 5.6          | Single Age   |
| 10SMB10-25 | 314   | 0.3411 | 0.3411 | 0.047    | 0.04688 | 0.0053   | 0.75517 | 297.9  | 35       | 295.9 | 32       | 309    | 14       | DISC     | DISC     | 0.7          | Single Age   |
| 10SMB10-26 | 503   | 0.778  | 0.778  | 0.05     | 0.0928  | 0.0055   | 0.87132 | 584    | 28       | 572   | 32       | 620    | 17       | 572      | 32       | 2.1          | Single Age   |
| 10SMB10-27 | 61.9  | 0.379  | 0.379  | 0.047    | 0.0516  | 0.0053   | 0.58673 | 325.9  | 35       | 324.3 | 32       | 326    | 21       | 324.3    | 32       | 0.5          | Single Age   |
| 10SMB10-28 | 247   | 0.6271 | 0.6271 | 0.047    | 0.07959 | 0.0053   | 0.73794 | 494.1  | 29       | 493.6 | 32       | 498    | 13       | 493.6    | 32       | 0.1          | Single Age   |
| 10SMB10-29 | 90.5  | 1.925  | 1.925  | 0.053    | 0.1857  | 0.0059   | 0.79517 | 1089.3 | 19       | 1098  | 32       | 1064   | 12       | 1064     | 12       | -3.2         | Single Age   |
| 10SMB10-30 | 238   | 0.5789 | 0.5789 | 0.047    | 0.074   | 0.0054   | 0.81807 | 463.5  | 30       | 460   | 32       | 496    | 13       | 460      | 32       | 0.8          | Single Age   |
| 10SMB10-32 | 433   | 0.581  | 0.581  | 0.048    | 0.0651  | 0.0056   | 0.57823 | 465.1  | 31       | 406   | 34       | 787    | 46       | DISC     | DISC     | 12.7         | Single Age   |
| 10SMB10-35 | 189   | 0.5677 | 0.5677 | 0.047    | 0.07367 | 0.0053   | 0.6084  | 456.3  | 30       | 458.2 | 32       | 461    | 14       | 458.2    | 32       | -0.4         | Single Age   |
| 10SMB10-37 | 649   | 0.3313 | 0.3313 | 0.047    | 0.04516 | 0.0054   | 0.79242 | 290.5  | 36       | 284.7 | 33       | 369    | 16       | DISC     | DISC     | 2.0          | Single Age   |
| 10SMB10-38 | 1341  | 0.333  | 0.333  | 0.047    | 0.04644 | 0.0054   | 0.85498 | 291.7  | 36       | 292.6 | 33       | 328    | 14       | DISC     | DISC     | -0.3         | Single Age   |
| 10SMB10-39 | 279.3 | 0.3965 | 0.3965 | 0.047    | 0.05149 | 0.0053   | 0.67623 | 339.1  | 34       | 323.6 | 33       | 449    | 15       | DISC     | DISC     | 4.6          | Single Age   |
| 10SMB10-40 | 93    | 0.3925 | 0.3925 | 0.047    | 0.0525  | 0.0053   | 0.67921 | 336.9  | 35       | 329.8 | 33       | 393    | 15       | DISC     | DISC     | 2.1          | Single Age   |
| 10SMB10-41 | 365   | 1.055  | 1.055  | 0.053    | 0.1192  | 0.0058   | 0.86362 | 730    | 26       | 726   | 34       | 760    | 20       | 726      | 34       | 0.5          | Single Age   |
| 10SMB10-42 | 1022  | 0.3086 | 0.3086 | 0.046    | 0.0425  | 0.0052   | 0.76023 | 273    | 36       | 268.3 | 32       | 320    | 10       | DISC     | DISC     | 1.7          | Single Age   |
| 10SMB10-43 | 249   | 0.376  | 0.376  | 0.047    | 0.0498  | 0.0053   | 0.76513 | 323.7  | 35       | 313.2 | 33       | 382    | 24       | DISC     | DISC     | 3.2          | Single Age   |
| 10SMB10-44 | 837   | 0.3327 | 0.3327 | 0.046    | 0.04599 | 0.0053   | 0.77952 | 291.5  | 35       | 289.8 | 32       | 313    | 11       | DISC     | DISC     | 0.6          | Single Age   |
| 10SMB10-46 | 651   | 0.3236 | 0.3236 | 0.047    | 0.04459 | 0.0053   | 0.85299 | 284.6  | 36       | 281.2 | 33       | 310    | 13       | DISC     | DISC     | 1.2          | Single Age   |
| 10SMB10-47 | 236   | 0.736  | 0.736  | 0.049    | 0.0877  | 0.0056   | 0.86777 | 559.7  | 28       | 542   | 33       | 637    | 12       | 542      | 33       | 3.2          | Single Age   |
| 10SMB10-48 | 547   | 0.3832 | 0.3832 | 0.047    | 0.05134 | 0.0053   | 0.48401 | 329.3  | 34       | 322.7 | 32       | 364    | 13       | 322.7    | 32       | 2.0          | Single Age   |
| 10SMB10-49 | 334   | 1.172  | 1.172  | 0.049    | 0.1296  | 0.0056   | 0.84781 | 788.1  | 22       | 786   | 32       | 805.5  | 9.8      | 786      | 32       | 0.3          | Single Age   |
| 10SMB10-50 | 306   | 0.5647 | 0.5647 | 0.048    | 0.0723  | 0.0054   | 0.7945  | 454.4  | 31       | 450.1 | 32       | 469    | 11       | 450.1    | 32       | 0.9          | Single Age   |
| 10SMB10-52 | 298.4 | 0.5921 | 0.5921 | 0.048    | 0.07356 | 0.0054   | 0.72781 | 472    | 31       | 457.5 | 32       | 533    | 15       | 457.5    | 32       | 3.1          | Single Age   |
| 10SMB10-53 | 104.3 | 0.994  | 0.994  | 0.054    | 0.0998  | 0.0055   | 0.36478 | 700    | 27       | 613.2 | 32       | 964    | 41       | DISC     | DISC     | 12.4         | Single Age   |
| 10SMB10-54 | 1050  | 0.3776 | 0.3776 | 0.047    | 0.04977 | 0.0053   | 0.71701 | 325.1  | 35       | 313.1 | 32       | 390    | 10       | DISC     | DISC     | 3.7          | Single Age   |
| 10SMB10-55 | 590   | 0.3165 | 0.3165 | 0.047    | 0.04241 | 0.0053   | 0.85015 | 279.1  | 36       | 267.7 | 33       | 384    | 16       | DISC     | DISC     | 4.1          | Single Age   |
| 10SMB10-56 | 399   | 0.877  | 0.877  | 0.05     | 0.1013  | 0.0055   | 0.83093 | 640.2  | 26       | 623.2 | 31       | 685    | 20       | 623.2    | 31       | 2.7          | Single Age   |
| 10SMB10-57 | 89.1  | 5.55   | 5.55   | 0.1      | 0.3461  | 0.0069   | 0.55637 | 1908   | 15       | 1921  | 35       | 1884   | 12       | 1884     | 12       | -2.0         | Single Age   |
| 10SMB10-59 | 294   | 0.729  | 0.729  | 0.051    | 0.0878  | 0.0057   | 0.86222 | 555.3  | 30       | 542   | 34       | 590    | 14       | 542      | 34       | 2.4          | Single Age   |
| 10SMB10-60 | 294   | 0.918  | 0.918  | 0.049    | 0.1071  | 0.0055   | 0.81331 | 661.2  | 26       | 656.1 | 32       | 671.7  | 9.1      | 656.1    | 32       | 0.8          | Single Age   |
| 10SMB10-61 | 396   | 0.3823 | 0.3823 | 0.048    | 0.0479  | 0.0054   | 0.64543 | 329.4  | 36       | 301.6 | 33       | 542    | 20       | DISC     | DISC     | 8.4          | Single Age   |
| 10SMB10-62 | 249   | 5.07   | 5.07   | 0.36     | 0.28    | 0.019    | 0.97382 | 1823   | 66       | 1591  | 97       | 2114   | 21       | DISC     | DISC     | 24.7         | Single Age   |
| 10SMB10-63 | 690   | 0.3105 | 0.3105 | 0.046    | 0.04332 | 0.0052   | 0.728   | 274.5  | 36       | 273.3 | 32       | 285    | 13       | DISC     | DISC     | 0.4          | Single Age   |
| 10SMB10-64 | 220   | 0.6199 | 0.6199 | 0.047    | 0.0785  | 0.0053   | 0.73465 | 490.2  | 30       | 487.1 | 32       | 508    | 13       | 487.1    | 32       | 0.6          | Single Age   |
| 10SMB10-65 | 866   | 0.3539 | 0.3539 | 0.047    | 0.04772 | 0.0053   | 0.79725 | 307.6  | 35       | 300.5 | 33       | 383    | 14       | DISC     | DISC     | 2.3          | Single Age   |
| 10SMB10-66 | 6500  | 0.3443 | 0.3443 | 0.047    | 0.04749 | 0.0053   | 0.88986 | 300.3  | 36       | 299.1 | 33       | 314.2  | 8.2      | DISC     | DISC     | 0.4          | Single Age   |
| 10SMB10-67 | 143   | 0.7808 | 0.7808 | 0.048    | 0.0947  | 0.0054   | 0.76322 | 586.4  | 28       | 583.3 | 32       | 586    | 12       | 583.3    | 32       | 0.5          | Single Age   |
| 10SMB10-69 | 587   | 2.987  | 2.987  | 0.062    | 0.2382  | 0.0061   | 0.74268 | 1404   | 16       | 1377  | 32       | 1457.7 | 9.7      | 1457.7   | 9.7      | 5.5          | Single Age   |
| 10SMB10-70 | 194   | 4.69   | 4.69   | 0.17     | 0.314   | 0.012    | 0.98393 | 1759   | 32       | 1755  | 61       | 1789   | 16       | 1789     | 16       | 1.9          | Single Age   |
| 10SMB10-72 | 190   | 0.5746 | 0.5746 | 0.047    | 0.07435 | 0.0053   | 0.55312 | 460.8  | 31       | 462.3 | 32       | 455    | 16       | 462.3    | 32       | -0.3         | Single Age   |
| 10SMB10-73 | 322   | 0.2932 | 0.2932 | 0.047    | 0.04066 | 0.0053   | 0.74975 | 261    | 37       | 256.9 | 33       | 292    | 16       | DISC     | DISC     | 1.6          | Single Age   |
| 10SMB10-74 | 824   | 0.3925 | 0.3925 | 0.047    | 0.05317 | 0.0053   | 0.81099 | 336.1  | 34       | 333.9 | 33       | 350    | 12       | 333.9    | 33       | 0.7          | Single Age   |
| 10SMB10-75 | 1054  | 0.478  | 0.478  | 0.048    | 0.053   | 0.0056   | 0.49023 | 396.5  | 33       | 333   | 34       | 815    | 63       | DISC     | DISC     | 16.0         | Single Age   |
| 10SMB10-76 | 257.7 | 0.3435 | 0.3435 | 0.047    | 0.04341 | 0.0053   | 0.66661 | 301.1  | 36       | 273.9 | 33       | 518    | 23       | DISC     | DISC     | 9.0          | Single Age   |
| 10SMB10-77 | 2502  | 0.281  | 0.281  | 0.045    | 0.03935 | 0.0053   | 0.69982 | 251.7  | 37       | 248.8 | 33       | 257    | 11       | DISC     | DISC     | 1.2          | Single Age   |
| 10SMB10-78 | 163   | 0.5633 | 0.5633 | 0.047    | 0.07145 | 0.0053   | 0.6458  | 453.5  | 31       | 444.9 | 32       | 480    | 16       | 444.9    | 32       | 1.9          | Single Age   |
| 10SMB10-79 | 1540  | 0.3082 | 0.3082 | 0.047    | 0.04255 | 0.0053   | 0.80696 | 272.7  | 37       | 268.6 | 33       | 284    | 8.6      | DISC     | DISC     | 1.5          | Single Age   |
| 10SMB10-80 | 307.2 | 0.5686 | 0.5686 | 0.048    | 0.07179 | 0.0054   | 0.78635 | 456.9  | 31       | 447.7 | 32       | 499    | 13       | 447.7    | 32       | 2.0          | Single Age   |
| 10SMB10-81 | 1766  | 0.218  | 0.218  | 0.049    | 0.0247  |          |         |        |          |       |          |        |          |          |          |              |              |

|               |       |        |        |        |         |        |          |        |     |        |     |       |     |       |      |      |            |
|---------------|-------|--------|--------|--------|---------|--------|----------|--------|-----|--------|-----|-------|-----|-------|------|------|------------|
| 10SMB10-105   | 158.3 | 0.3158 | 0.3158 | 0.048  | 0.04421 | 0.0054 | 0.55008  | 278.6  | 37  | 278.8  | 33  | 276   | 15  | DISC  | DISC | -0.1 | Single Age |
| 10SMB10-106   | 272   | 0.4023 | 0.4023 | 0.049  | 0.05178 | 0.0054 | 0.67929  | 343.1  | 35  | 325.4  | 33  | 468   | 22  | DISC  | DISC | 5.2  | Single Age |
| 10SMB10-107   | 878   | 3.28   | 3.28   | 0.1    | 0.2022  | 0.0073 | 0.93391  | 1475   | 24  | 1187   | 39  | 1930  | 11  | DISC  | DISC | 38.5 | Single Age |
| 10SMB10-108   | 402   | 0.3832 | 0.3832 | 0.048  | 0.04625 | 0.0054 | 0.56097  | 329.2  | 35  | 291.5  | 33  | 592   | 26  | DISC  | DISC | 11.5 | Single Age |
| 10SMB10-109   | 302   | 0.3786 | 0.3786 | 0.048  | 0.0478  | 0.0054 | 0.58452  | 325.9  | 35  | 301    | 33  | 516   | 18  | DISC  | DISC | 7.6  | Single Age |
| 10SMB10-111   | 203.8 | 0.627  | 0.627  | 0.049  | 0.0798  | 0.0055 | 0.88613  | 494.5  | 30  | 494.9  | 33  | 498   | 14  | 494.9 | 33   | -0.1 | Single Age |
| 10SMB10-112   | 546   | 0.5835 | 0.5835 | 0.048  | 0.07546 | 0.0054 | 0.77253  | 466.6  | 30  | 469    | 32  | 464.6 | 7.9 | 469   | 32   | -0.5 | Single Age |
| 10SMB10-113   | 378   | 0.3505 | 0.3505 | 0.047  | 0.0496  | 0.0054 | 0.83206  | 304.9  | 35  | 312.1  | 33  | 297   | 14  | DISC  | DISC | -2.4 | Single Age |
| 10SMB10-114   | 464   | 0.767  | 0.767  | 0.048  | 0.0941  | 0.0055 | 0.86832  | 577.6  | 28  | 579.5  | 32  | 591   | 13  | 579.5 | 32   | -0.3 | Single Age |
| 10SMB10-115   | 224   | 0.578  | 0.578  | 0.059  | 0.0735  | 0.0067 | 0.96557  | 462    | 38  | 457    | 40  | 509   | 23  | 457   | 40   | 1.1  | Single Age |
| 10SMB10-116   | 1024  | 0.428  | 0.428  | 0.047  | 0.0433  | 0.0054 | -0.44656 | 363.1  | 32  | 273    | 33  | 1008  | 98  | DISC  | DISC | 24.8 | Single Age |
| 10SMB10-117   | 280.2 | 0.8027 | 0.8027 | 0.023  | 0.09754 | 0.003  | 0.67326  | 598.2  | 13  | 599.9  | 18  | 592.4 | 8.4 | 599.9 | 18   | -0.3 | Single Age |
| 10SMB10-118   | 113.8 | 4.5    | 4.5    | 0.14   | 0.3074  | 0.0094 | 0.93595  | 1729   | 26  | 1727   | 46  | 1705  | 12  | 1705  | 12   | -1.3 | Single Age |
| 10SMB10-119   | 26.8  | 15.34  | 15.34  | 0.33   | 0.553   | 0.0094 | 0.76776  | 2835   | 20  | 2837   | 39  | 2837  | 12  | 2837  | 12   | 0.0  | Single Age |
| 10SMB10-120   | 617   | 0.385  | 0.385  | 0.028  | 0.0499  | 0.0037 | 0.9461   | 330    | 20  | 314    | 23  | 460   | 15  | 314   | 23   | 4.8  | Single Age |
| 10SMB10-121   | 99.4  | 3.848  | 3.848  | 0.05   | 0.2829  | 0.0046 | 0.8329   | 1602.3 | 10  | 1605   | 23  | 1608  | 11  | 1608  | 11   | 0.2  | Single Age |
| 10SMB10-123   | 301.1 | 0.6067 | 0.6067 | 0.025  | 0.07774 | 0.0032 | 0.72416  | 481.3  | 16  | 482.6  | 19  | 485   | 15  | 482.6 | 19   | -0.3 | Single Age |
| 10SMB10-125   | 83.4  | 2.47   | 2.47   | 0.046  | 0.2169  | 0.0038 | 0.6485   | 1263   | 14  | 1266   | 20  | 1285  | 22  | 1285  | 22   | 1.5  | Single Age |
| 10SMB10-128   | 292   | 0.3874 | 0.3874 | 0.024  | 0.05308 | 0.0032 | 0.78809  | 332.3  | 18  | 333.4  | 19  | 332   | 13  | 333.4 | 19   | -0.3 | Single Age |
| 10SMB10-129   | 195.3 | 1.504  | 1.504  | 0.045  | 0.1471  | 0.0044 | 0.85382  | 934    | 17  | 885    | 25  | 1063  | 19  | 1063  | 19   | 16.7 | Single Age |
| 10SMB10-130   | 181   | 0.797  | 0.797  | 0.029  | 0.0964  | 0.0036 | 0.89251  | 594.2  | 17  | 593    | 21  | 608   | 14  | 593   | 21   | 0.2  | Single Age |
| 10SMB10-131   | 682   | 0.3138 | 0.3138 | 0.024  | 0.04327 | 0.0032 | 0.80873  | 277    | 18  | 273.1  | 20  | 307   | 11  | 273.1 | 20   | 1.4  | Single Age |
| 10SMB10-132   | 334   | 0.392  | 0.392  | 0.025  | 0.0474  | 0.0033 | 0.83654  | 335.6  | 18  | 298.5  | 20  | 598   | 16  | DISC  | DISC | 11.1 | Single Age |
| 10SMB10-133   | 172   | 0.674  | 0.674  | 0.032  | 0.0809  | 0.0041 | 0.92454  | 522    | 20  | 501    | 24  | 589   | 16  | 501   | 24   | 4.0  | Single Age |
| 10SMB10-136   | 314   | 0.5687 | 0.5687 | 0.024  | 0.07264 | 0.0031 | 0.6166   | 457    | 16  | 452    | 19  | 478   | 13  | 452   | 19   | 1.1  | Single Age |
| 10SMB10-137   | 163.6 | 0.658  | 0.658  | 0.031  | 0.0791  | 0.0039 | 0.95662  | 513    | 19  | 491    | 23  | 598   | 14  | 491   | 23   | 4.3  | Single Age |
| 10SMB10-138   | 415   | 0.704  | 0.704  | 0.028  | 0.0871  | 0.0036 | 0.9245   | 540.8  | 17  | 538    | 21  | 543   | 11  | 538   | 21   | 0.5  | Single Age |
| 10SMB10-139   | 63.37 | 0.3264 | 0.3264 | 0.026  | 0.04423 | 0.0032 | 0.50929  | 286.4  | 20  | 279    | 20  | 328   | 32  | 279   | 20   | 2.6  | Single Age |
| 10SMB10-140   | 945   | 0.3331 | 0.3331 | 0.024  | 0.04618 | 0.0032 | 0.81256  | 291.8  | 18  | 291    | 20  | 309   | 11  | 291   | 20   | 0.3  | Single Age |
| SMB10_1.FIN2  | 42.3  | 0.5539 | 1.473  | 0.041  | 0.1519  | 0.0037 | 0.44708  | 918    | 17  | 911    | 21  | 946   | 54  | 946   | 54   | 3.7  | Single Age |
| SMB10_2.FIN2  | 151.7 | 1.271  | 1.624  | 0.014  | 0.1659  | 0.0012 | 0.53975  | 979.3  | 5.4 | 989.4  | 6.4 | 973   | 17  | 973   | 17   | 1.7  | Single Age |
| SMB10_3.FIN2  | 570   | 9.79   | 0.539  | 0.0064 | 0.07061 | 0.0008 | 0.43476  | 437.6  | 4.2 | 439.8  | 5   | 449   | 22  | 439.8 | 5    | 0.5  | Single Age |
| SMB10_4.FIN2  | 512   | 10.7   | 0.6296 | 0.0082 | 0.07931 | 0.001  | 0.051598 | 495.6  | 5.1 | 492    | 5.9 | 517   | 18  | 492   | 5.9  | 0.7  | Single Age |
| SMB10_5.FIN2  | 869   | 3.4    | 4.76   | 0.17   | 0.2423  | 0.0077 | 0.92713  | 1776   | 30  | 1398   | 40  | 2264  | 21  | DISC  | DISC | 38.3 | Single Age |
| SMB10_6.FIN2  | 144.1 | 1.213  | 0.3754 | 0.0059 | 0.05143 | 0.0006 | 0.41522  | 323.4  | 4.3 | 323.3  | 3.5 | 306   | 35  | 323.3 | 3.5  | 0.0  | Single Age |
| SMB10_8.FIN2  | 283   | 5.22   | 0.5797 | 0.0068 | 0.07483 | 0.0008 | 0.75967  | 464.1  | 4.4 | 465.1  | 4.9 | 463   | 22  | 465.1 | 4.9  | 0.2  | Single Age |
| SMB10_9.FIN2  | 177.9 | 1.399  | 0.3429 | 0.0058 | 0.04724 | 0.0006 | 0.15606  | 299.2  | 4.3 | 297.5  | 3.7 | 290   | 42  | 297.5 | 3.7  | 0.6  | Single Age |
| SMB10_10.FIN2 | 29.42 | 1.895  | 2.887  | 0.065  | 0.2018  | 0.0053 | 0.62017  | 1377   | 17  | 1184   | 28  | 1703  | 46  | DISC  | DISC | 30.5 | Single Age |
| SMB10_11.FIN2 | 330.9 | 0.844  | 0.3809 | 0.007  | 0.05167 | 0.0009 | 0.51284  | 327.6  | 5.2 | 324.7  | 5.6 | 366   | 46  | 324.7 | 5.6  | 0.9  | Single Age |
| SMB10_13.FIN2 | 181.5 | 26.7   | 1.652  | 0.018  | 0.1679  | 0.0017 | 0.59827  | 991.2  | 7   | 1000.5 | 9.2 | 976   | 20  | 976   | 20   | 2.5  | Single Age |
| SMB10_14.FIN2 | 145.7 | 1.644  | 12.1   | 0.15   | 0.4842  | 0.0072 | 0.83365  | 2611   | 12  | 2545   | 31  | 2658  | 13  | 2658  | 13   | 4.3  | Single Age |
| SMB10_15.FIN2 | 1457  | 2.36   | 0.2769 | 0.0041 | 0.03702 | 0.0006 | 0.89544  | 248.1  | 3.3 | 234.3  | 3.8 | 380   | 19  | 234.3 | 3.8  | 5.6  | Single Age |
| SMB10_16.FIN2 | 176   | 1.657  | 0.586  | 0.013  | 0.07211 | 0.0009 | 0.27584  | 467.9  | 8.5 | 448.8  | 5.7 | 571   | 44  | 448.8 | 5.7  | 4.1  | Single Age |
| SMB10_17.FIN2 | 277   | 1.6    | 0.354  | 0.012  | 0.04875 | 0.0007 | 0.25312  | 307.1  | 8.7 | 306.8  | 4.1 | 293   | 37  | 306.8 | 4.1  | 0.1  | Single Age |
| SMB10_18.FIN2 | 156   | 0.85   | 0.3899 | 0.0056 | 0.05355 | 0.0006 | 0.4837   | 334.1  | 4.1 | 336.3  | 3.8 | 322   | 32  | 336.3 | 3.8  | 0.7  | Single Age |
| SMB10_19.FIN2 | 228   | 3.49   | 0.7424 | 0.0091 | 0.09153 | 0.001  | 0.50724  | 564.6  | 5   | 564.5  | 5.8 | 583   | 24  | 564.5 | 5.8  | 0.0  | Single Age |
| SMB10_20.FIN2 | 515   | 7.03   | 0.4447 | 0.0053 | 0.05944 | 0.0009 | 0.63109  | 373.5  | 3.8 | 372.2  | 5.2 | 395   | 27  | 372.2 | 5.2  | 0.3  | Single Age |
| SMB10_22.FIN2 | 56.3  | 1.541  | 3.061  | 0.05   | 0.2432  | 0.0037 | 0.67296  | 1422   | 13  | 1406   | 20  | 1457  | 24  | 1457  | 24   | 3.5  | Single Age |
| SMB10_23.FIN2 | 794   | 13.43  | 0.6053 | 0.0057 | 0.07709 | 0.0008 | 0.72498  | 480.4  | 3.6 | 478.7  | 4.9 | 500   | 15  | 478.7 | 4.9  | 0.4  | Single Age |
| SMB10_24.FIN2 | 596   | 0.959  | 0.3311 | 0.0033 | 0.04568 | 0.0005 | 0.19629  | 290.4  | 2.5 | 287.9  | 2.8 | 313   | 26  | 287.9 | 2.8  | 0.9  | Single Age |
| SMB10_25.FIN2 | 1409  | 26.5   | 0.319  | 0.018  | 0.0402  | 0.0012 | 0.62198  | 281    | 14  | 254.1  | 7.7 | 518   | 86  | 254.1 | 7.7  | 9.6  | Rim        |
| SMB10_25.FIN2 | 386.5 | 1.188  | 0.576  | 0.011  | 0.0734  | 0.0013 | 0.13445  | 461.9  | 7.3 | 456.7  | 7.6 | 486   | 38  | 456.7 | 7.6  | 1.1  | Core       |
| SMB10_26.FIN2 | 700   | 3.102  | 0.332  | 0.0035 | 0.04512 | 0.0005 | 0.56009  | 291    | 2.7 | 284.5  | 3.2 | 350   | 24  | 284.5 | 3.2  | 2.2  | Single Age |
| SMB10_27.FIN2 | 285.1 | 3.1    | 0.599  | 0.012  | 0.0737  | 0.0013 | 0.61746  | 476.2  | 7.8 | 458.2  | 7.7 | 543   | 34  | 458.2 | 7.7  | 3.8  | Single Age |
| SMB10_29.FIN2 | 414   | 72     | 0.433  | 0.056  | 0.0528  | 0.0024 | 0.41226  | 363    | 36  | 332    | 15  | 409   | 75  | 332   | 15   | 8.5  | Rim        |
| SMB10_29.FIN2 | 188   | 1.102  | 0.838  | 0.017  | 0.0993  | 0.0023 | 0.81458  | 618.1  | 9.6 | 610    | 14  | 651   | 26  | 610   | 14   | 1.3  | Core       |
| SMB10_31.FIN2 | 465   | 2.002  | 0.3635 | 0.0066 | 0.04965 | 0.0006 | 0.48652  | 316.2  | 4.9 | 313    | 4   | 361   | 37  | 313   | 4    | 1.0  | Single Age |
| SMB10_32.FIN2 | 187.7 | 1.567  | 0.63   | 0.012  | 0.07939 | 0.0008 | 0.11552  | 495.4  | 7.3 | 492.5  | 4.4 | 499   | 44  | 492.5 | 4.4  | 0.6  | Single Age |
| SMB10_34.FIN2 | 102.4 | 1.311  | 5.294  | 0.084  | 0.3265  | 0.0053 | 0.84408  | 1869   | 14  | 1821   | 26  | 1924  | 17  | 1924  | 17   | 5.4  | Single Age |
| SMB10_35.FIN2 | 148.3 | 0.546  | 3.96   | 0.27   | 0.2648  | 0.004  | 0.25213  | 1617   | 50  | 1514   | 20  | 1760  | 110 | 1760  | 110  | 14.0 | Single Age |
| SMB10_36.FIN2 | 118   | 2.029  | 0.3167 | 0.0056 | 0.04431 | 0.0007 | 0.031811 | 279.2  | 4.3 | 279.5  | 4.5 | 281   | 51  | 279.5 | 4.5  | 0.1  | Single Age |
| SMB10_37.FIN2 | 213   | 3.05   | 0.5675 | 0.0067 | 0.07315 | 0.0007 | 0.014874 | 456.2  | 4.3 | 455.1  | 4   | 472   | 31  | 455.1 | 4    | 0.2  | Single Age |
| SMB10_38.FIN2 | 136.9 | 5.12   | 0.5765 | 0.0093 | 0.07489 | 0.0008 | 0.1456   | 462.9  | 5.7 | 465.5  | 4.9 | 457   | 30  | 465.5 | 4.9  | 0.6  | Single Age |
| SMB10_39.FIN2 | 388   | 7.46   | 0.5741 | 0.0072 | 0.07402 | 0.0009 | 0.46322  | 460.5  | 4.7 | 460.3  | 5.6 | 489   | 24  | 460.3 | 5.6  | 0.0  | Single Age |
| SMB10_40.FIN2 | 182   | 3.85   | 0.626  | 0.011  | 0.0808  | 0.0012 | 0.73791  | 493.3  | 6.9 | 501.1  | 7.2 | 473   | 32  | 501.1 | 7.2  | 1.6  | Single Age |
| SMB10_42.FIN2 | 1191  | 2.71   | 0.396  | 0.011  | 0.0444  | 0.0009 | 0.50969  | 338.6  | 8.1 | 280.1  | 5.4 | 775   | 45  | DISC  | DISC | 17.3 | Single Age |
| SMB10_44.FIN2 | 362   | 1.726  | 0.3568 | 0.0053 | 0.04968 | 0.0007 | 0.61185  | 309.7  | 4   | 312.5  | 4.1 | 282   | 33  | 312.5 | 4.1  | 0.9  | Single Age |
| SMB10_45.FIN2 | 232   | 1.289  | 0.755  | 0.012  | 0.0921  | 0.0016 | 0.69644  | 570.6  | 6.9 | 568.1  | 9.6 | 592   | 27  | 568.1 | 9.6  | 0.4  | Single Age |
| SMB10_46.FIN2 | 454.4 | 2.269  | 0.3263 | 0.0031 | 0.0454  | 0.0004 | 0.42892  | 286.7  | 2.4 | 286.2  | 2.3 | 298   | 22  | 286.2 | 2.3  | 0.2  | Single Age |
| SMB10_48.FIN2 | 199   | 2.52   | 0.3894 | 0.0064 | 0.05314 | 0.0006 | 0.012334 | 333.7  | 4.7 | 333.8  | 3.7 | 344   | 40  | 333.8 | 3.7  | 0.0  | Single Age |
| SMB10_49.FIN2 | 156.7 | 2.506  | 2.411  | 0.032  | 0.2074  | 0.0026 | 0.34286  | 1245.2 | 9.4 | 1215   | 14  | 1295  | 22  | 1295  | 22   | 6.2  | Single Age |
| SMB10_50.FIN2 | 131.1 | 2.091  | 1.122  | 0.014  | 0.1245  | 0.0    |          |        |     |        |     |       |     |       |      |      |            |

|                |       |         |        |        |         |        |          |        |     |       |     |      |    |       |      |      |            |
|----------------|-------|---------|--------|--------|---------|--------|----------|--------|-----|-------|-----|------|----|-------|------|------|------------|
| SMB10_77.FIN2  | 177   | 0.8721  | 0.3307 | 0.0056 | 0.04537 | 0.0006 | 0.33453  | 289.9  | 4.3 | 286   | 3.4 | 305  | 33 | 286   | 3.4  | 1.3  | Single Age |
| SMB10_78.FIN2  | 128.6 | 6.41    | 0.534  | 0.011  | 0.0693  | 0.0012 | 0.34236  | 434.2  | 7.1 | 431.7 | 7.4 | 424  | 48 | 431.7 | 7.4  | 0.6  | Single Age |
| SMB10_79.FIN2  | 930   | 2.11    | 0.3111 | 0.0039 | 0.04356 | 0.0006 | 0.54706  | 274.9  | 3   | 274.9 | 3.6 | 282  | 29 | 274.9 | 3.6  | 0.0  | Single Age |
| SMB10_80.FIN2  | 414   | 7.7     | 0.3873 | 0.0058 | 0.05261 | 0.0006 | 0.35404  | 332.2  | 4.3 | 330.5 | 3.3 | 322  | 28 | 330.5 | 3.3  | 0.5  | Single Age |
| SMB10_81.FIN2  | 1846  | 22.1    | 0.3488 | 0.0095 | 0.0347  | 0.0016 | 0.55533  | 303.8  | 7.1 | 220   | 10  | 1043 | 77 | DISC  | DISC | 27.6 | Rim        |
| SMB10_81.FIN2  | 316   | 7.24    | 0.5358 | 0.0099 | 0.0707  | 0.0017 | 0.69547  | 435.5  | 6.5 | 440   | 10  | 419  | 37 | 440   | 10   | 1.0  | Core       |
| SMB10_82.FIN2  | 120   | 1.159   | 0.3649 | 0.0083 | 0.0504  | 0.0012 | 0.64604  | 316.7  | 6.4 | 317   | 7.4 | 318  | 50 | 317   | 7.4  | 0.1  | Single Age |
| SMB10_83.FIN2  | 688   | 1.842   | 0.348  | 0.0042 | 0.04746 | 0.0006 | 0.346    | 303.1  | 3.2 | 298.9 | 3.6 | 336  | 26 | 298.9 | 3.6  | 1.4  | Single Age |
| SMB10_85.FIN2  | 135.5 | 0.759   | 0.3582 | 0.0081 | 0.04981 | 0.0005 | 0.30522  | 310.6  | 6.1 | 313.3 | 3.3 | 290  | 50 | 313.3 | 3.3  | 0.9  | Single Age |
| SMB10_86.FIN2  | 81.9  | 13.2    | 0.517  | 0.018  | 0.0677  | 0.0025 | 0.69687  | 422    | 12  | 422   | 15  | 462  | 65 | 422   | 15   | 0.0  | Single Age |
| SMB10_87.FIN2  | 70.6  | 0.902   | 0.876  | 0.012  | 0.1045  | 0.0013 | 0.49538  | 638.7  | 6.2 | 640.8 | 7.7 | 630  | 31 | 640.8 | 7.7  | 0.3  | Single Age |
| SMB10_88.FIN2  | 233.4 | 1.742   | 0.802  | 0.013  | 0.0973  | 0.0015 | 0.80314  | 597.9  | 7.2 | 600.1 | 8.2 | 607  | 21 | 600.1 | 8.2  | 0.4  | Single Age |
| SMB10_89.FIN2  | 1331  | 3.133   | 0.3232 | 0.009  | 0.02487 | 0.0006 | 0.45897  | 284.3  | 6.9 | 158.4 | 3.7 | 1535 | 60 | DISC  | DISC | 44.3 | Rim        |
| SMB10_89.FIN2  | 474   | 1.78    | 0.371  | 0.0065 | 0.04527 | 0.0006 | 0.005453 | 320.3  | 4.8 | 285.4 | 3.6 | 589  | 42 | DISC  | DISC | 10.9 | Core       |
| SMB10_90.FIN2  | 113   | 1.109   | 0.4151 | 0.0095 | 0.0561  | 0.0011 | 0.57487  | 352.3  | 6.8 | 351.6 | 6.8 | 384  | 45 | 351.6 | 6.8  | 0.2  | Single Age |
| SMB10_91.FIN2  | 164   | 1.462   | 0.83   | 0.012  | 0.1019  | 0.0011 | 0.51961  | 613.2  | 6.6 | 625.5 | 6.5 | 587  | 28 | 625.5 | 6.5  | 2.0  | Single Age |
| SMB10_92.FIN2  | 105   | 1.138   | 0.3906 | 0.0099 | 0.05286 | 0.0007 | 0.09362  | 334.3  | 7.2 | 332   | 4.5 | 322  | 52 | 332   | 4.5  | 0.7  | Single Age |
| SMB10_93.FIN2  | 192.1 | 1.03    | 1.686  | 0.025  | 0.1697  | 0.0023 | 0.58071  | 1002.9 | 9.4 | 1010  | 13  | 983  | 24 | 983   | 24   | 2.7  | Single Age |
| SMB10_94.FIN2  | 312   | 2.135   | 0.4167 | 0.0065 | 0.05582 | 0.0008 | 0.50952  | 354.2  | 4.8 | 350.1 | 4.7 | 371  | 31 | 350.1 | 4.7  | 1.2  | Single Age |
| SMB10_95.FIN2  | 307   | 2.395   | 0.3521 | 0.0043 | 0.04844 | 0.0006 | 0.57038  | 306.2  | 3.2 | 304.9 | 3.4 | 315  | 25 | 304.9 | 3.4  | 0.4  | Single Age |
| SMB10_96.FIN2  | 421   | 1.42    | 0.3643 | 0.0074 | 0.049   | 0.001  | 0.51482  | 315.3  | 5.5 | 308.3 | 6.1 | 347  | 37 | 308.3 | 6.1  | 2.2  | Single Age |
| SMB10_97.FIN2  | 752   | 1.77    | 0.3491 | 0.0054 | 0.04789 | 0.0007 | 0.58053  | 303.9  | 4   | 301.5 | 4   | 299  | 25 | 301.5 | 4    | 0.8  | Single Age |
| SMB10_99.FIN2  | 74.6  | 1.064   | 1.702  | 0.026  | 0.17    | 0.0022 | 0.36417  | 1010   | 9.7 | 1012  | 12  | 989  | 31 | 989   | 31   | 2.3  | Single Age |
| SMB10_100.FIN2 | 295   | 4.28    | 0.4119 | 0.0058 | 0.05518 | 0.0006 | 0.032444 | 350.2  | 4.2 | 348.4 | 3.6 | 361  | 38 | 346.2 | 3.6  | 1.1  | Single Age |
| SMB10_102.FIN2 | 252   | 1.297   | 0.3328 | 0.0053 | 0.04591 | 0.0006 | 0.41224  | 291.6  | 4   | 289.3 | 3.5 | 304  | 34 | 289.3 | 3.5  | 0.8  | Single Age |
| SMB10_103.FIN2 | 313   | 2.66    | 0.4221 | 0.0061 | 0.05631 | 0.0006 | 0.60015  | 357.4  | 4.3 | 353.1 | 3.9 | 398  | 27 | 353.1 | 3.9  | 1.2  | Single Age |
| SMB10_104.FIN2 | 1251  | 1       | 0.1945 | 0.0038 | 0.02534 | 0.0005 | 0.33807  | 180.4  | 3.2 | 161.3 | 3.4 | 468  | 43 | DISC  | DISC | 10.6 | Rim        |
| SMB10_104.FIN2 | 536   | 1.671   | 0.379  | 0.012  | 0.05238 | 0.0008 | 0.53634  | 326.2  | 9   | 329.1 | 4.9 | 316  | 69 | 329.1 | 4.9  | 0.9  | Core       |
| SMB10_105.FIN2 | 20.37 | 0.496   | 1.76   | 0.056  | 0.1739  | 0.0038 | 0.15958  | 1033   | 22  | 1033  | 21  | 1083 | 94 | 1083  | 94   | 4.6  | Single Age |
| SMB10_106.FIN2 | 207   | 1.316   | 0.3926 | 0.0055 | 0.05379 | 0.0005 | 0.16091  | 336.1  | 4   | 337.8 | 3   | 351  | 32 | 337.8 | 3    | 0.5  | Single Age |
| SMB10_107.FIN2 | 124.1 | 0.687   | 0.4105 | 0.0069 | 0.056   | 0.001  | 0.61853  | 349    | 4.9 | 351.3 | 6.4 | 361  | 35 | 351.3 | 6.4  | 0.7  | Single Age |
| SMB10_108.FIN2 | 129   | 2.35    | 0.356  | 0.0098 | 0.04737 | 0.0009 | 0.49149  | 308.9  | 7.3 | 298.3 | 5.7 | 380  | 54 | 298.3 | 5.7  | 3.4  | Single Age |
| SMB10_109.FIN2 | 395   | 1.422   | 0.788  | 0.01   | 0.0973  | 0.0014 | 0.70121  | 590.1  | 5.8 | 598.4 | 8   | 573  | 25 | 598.4 | 8    | 1.4  | Single Age |
| SMB10_110.FIN2 | 128   | 8.7     | 0.743  | 0.013  | 0.0915  | 0.0011 | 0.36655  | 563.7  | 7.7 | 564.3 | 6.4 | 569  | 35 | 564.3 | 6.4  | 0.1  | Single Age |
| SMB10_111.FIN2 | 169   | 1.141   | 0.58   | 0.012  | 0.07339 | 0.0009 | 0.069608 | 463.9  | 7.5 | 456.5 | 5.3 | 464  | 42 | 456.5 | 5.3  | 1.6  | Single Age |
| SMB10_115.FIN2 | 5420  | 0.02885 | 0.3001 | 0.0031 | 0.04067 | 0.0004 | 0.83285  | 266.4  | 2.4 | 257   | 2.5 | 329  | 12 | 257   | 2.5  | 3.5  | Single Age |
| SMB10_116.FIN2 | 419   | 3.434   | 0.3576 | 0.0051 | 0.04911 | 0.0005 | 0.46068  | 310.3  | 3.8 | 309   | 3   | 310  | 30 | 309   | 3    | 0.4  | Single Age |
| SMB10_117.FIN2 | 166.7 | 1.204   | 0.3412 | 0.0053 | 0.04715 | 0.0005 | 0.31174  | 298.6  | 4.1 | 297   | 3.1 | 292  | 33 | 297   | 3.1  | 0.5  | Single Age |
| SMB10_118.FIN2 | 124.9 | 1.4     | 2.756  | 0.048  | 0.2216  | 0.0037 | 0.70607  | 1343   | 13  | 1290  | 19  | 1397 | 21 | 1397  | 21   | 7.7  | Single Age |
| SMB10_119.FIN2 | 282   | 8.57    | 0.787  | 0.011  | 0.0958  | 0.0011 | 0.44333  | 589.2  | 6.4 | 589.6 | 6.7 | 569  | 35 | 589.6 | 6.7  | 0.1  | Single Age |

| Sample Name:                             |       | 10SMB11 |      | Isotopic Ratios |          |         |          |          |        | Apparent Ages (Ma) |       |          |       |          |          |          |              |              |  |  |  |  |  |
|------------------------------------------|-------|---------|------|-----------------|----------|---------|----------|----------|--------|--------------------|-------|----------|-------|----------|----------|----------|--------------|--------------|--|--|--|--|--|
| Lower Freshwater Mollasse II (22 ± 2 Ma) |       |         |      |                 |          |         |          |          |        |                    |       |          |       |          |          |          |              |              |  |  |  |  |  |
|                                          |       | U       | U/Th | 207Pb           | 2σ error | 206Pb   | 2σ error | Error    | 207Pb  | 2σ error           | 206Pb | 2σ error | 207Pb | 2σ error | Best age | 2σ error | Discordance* | Rim, Core or |  |  |  |  |  |
| Grain #                                  | (ppm) |         |      | 235U            | (abs.)   | 238U    | (abs.)   | Corr.    | 235U   | (Ma)               | 238U  | (Ma)     | 206Pb | (Ma)     | (Ma)     | (Ma)     |              | Single Age   |  |  |  |  |  |
| SMB11_1.FIN2                             | 245   | 4.68    |      | 0.604           | 0.015    | 0.0751  | 0.0017   | 0.71526  | 479.1  | 9.2                | 467   | 10       | 508   | 35       | 467      | 10       | 2.5          | Single Age   |  |  |  |  |  |
| SMB11_2.FIN2                             | 1460  | 0.01345 |      | 0.39            | 0.012    | 0.0502  | 0.0011   | 0.49955  | 334.5  | 8.5                | 315.7 | 6.8      | 463   | 53       | 315.7    | 6.8      | 5.6          | Single Age   |  |  |  |  |  |
| SMB11_5.FIN2                             | 431   | 1.184   |      | 0.3572          | 0.0036   | 0.04948 | 0.0003   | 0.056434 | 310.1  | 2.7                | 311.3 | 1.8      | 303   | 26       | 311.3    | 1.8      | 0.4          | Single Age   |  |  |  |  |  |
| SMB11_7.FIN2                             | 181.5 | 0.754   |      | 0.4078          | 0.0077   | 0.05582 | 0.0006   | 0.27079  | 347.1  | 5.5                | 350.1 | 3.5      | 336   | 42       | 350.1    | 3.5      | 0.9          | Single Age   |  |  |  |  |  |
| SMB11_8.FIN2                             | 126.1 | 0.969   |      | 0.541           | 0.011    | 0.07103 | 0.0009   | 0.26152  | 440.2  | 7.5                | 442.4 | 5.1      | 456   | 42       | 442.4    | 5.1      | 0.5          | Single Age   |  |  |  |  |  |
| SMB11_9.FIN2                             | 160.4 | 0.652   |      | 0.575           | 0.011    | 0.0746  | 0.0011   | 0.41748  | 461.1  | 6.8                | 463.8 | 6.4      | 475   | 39       | 463.8    | 6.4      | 0.6          | Single Age   |  |  |  |  |  |
| SMB11_10.FIN2                            | 49.3  | 1.149   |      | 3.7             | 0.055    | 0.2761  | 0.0029   | 0.48056  | 1572   | 11                 | 1571  | 15       | 1596  | 22       | 1596     | 22       | 1.6          | Single Age   |  |  |  |  |  |
| SMB11_11.FIN2                            | 211   | 29      |      | 0.61            | 0.084    | 0.0572  | 0.001    | 0.078836 | 479    | 48                 | 358.8 | 6.3      | 1060  | 230      | DISC     | DISC     | 25.1         | Rim          |  |  |  |  |  |
| SMB11_11.FIN2                            | 198   | 1.383   |      | 0.617           | 0.018    | 0.07072 | 0.0007   | 0.069943 | 487    | 11                 | 440.5 | 4.3      | 710   | 60       | 440.5    | 4.3      | 9.5          | Core         |  |  |  |  |  |
| SMB11_12.FIN2                            | 100   | 1.098   |      | 1.099           | 0.018    | 0.1202  | 0.0016   | 0.42837  | 752.7  | 8.9                | 733.5 | 9.8      | 805   | 35       | 733.5    | 9.8      | 2.6          | Single Age   |  |  |  |  |  |
| SMB11_13.FIN2                            | 164   | 4.39    |      | 0.663           | 0.01     | 0.0835  | 0.0012   | 0.66097  | 516.1  | 6.4                | 516.7 | 6.9      | 495   | 37       | 516.7    | 6.9      | 0.1          | Single Age   |  |  |  |  |  |
| SMB11_14.FIN2                            | 716   | 0.00996 |      | 0.5528          | 0.0075   | 0.0681  | 0.0011   | 0.22598  | 446.7  | 4.9                | 424.8 | 6.5      | 575   | 36       | 424.8    | 6.5      | 4.9          | Single Age   |  |  |  |  |  |
| SMB11_15.FIN2                            | 418   | 2.041   |      | 0.444           | 0.01     | 0.0502  | 0.0012   | 0.47586  | 373    | 7.3                | 315.8 | 7.2      | 745   | 43       | DISC     | DISC     | 15.3         | Single Age   |  |  |  |  |  |
| SMB11_16.FIN2                            | 5681  | 0.07828 |      | 0.3487          | 0.0031   | 0.04686 | 0.0004   | 0.6915   | 303.7  | 2.3                | 295.2 | 2.3      | 385   | 17       | 295.2    | 2.3      | 2.8          | Single Age   |  |  |  |  |  |
| SMB11_17.FIN2                            | 6120  | 0.0915  |      | 0.5187          | 0.0047   | 0.066   | 0.0007   | 0.84785  | 424.2  | 3.1                | 412   | 4.3      | 493   | 12       | 412      | 4.3      | 2.9          | Single Age   |  |  |  |  |  |
| SMB11_18.FIN2                            | 127.7 | 1.386   |      | 2.23            | 0.034    | 0.2019  | 0.0021   | 0.56567  | 1189   | 10                 | 1185  | 11       | 1209  | 27       | 1209     | 27       | 2.0          | Single Age   |  |  |  |  |  |
| SMB11_19.FIN2                            | 173.2 | 2.431   |      | 7.263           | 0.071    | 0.3892  | 0.0028   | 0.3059   | 2143.7 | 8.8                | 2119  | 13       | 2172  | 20       | 2172     | 20       | 2.4          | Single Age   |  |  |  |  |  |
| SMB11_21.FIN2                            | 721   | 0.01042 |      | 0.5038          | 0.0072   | 0.06444 | 0.0006   | 0.62861  | 414.1  | 4.8                | 402.6 | 3.8      | 489   | 20       | 402.6    | 3.8      | 2.8          | Single Age   |  |  |  |  |  |
| SMB11_22.FIN2                            | 190   | 0.839   |      | 0.5433          | 0.0093   | 0.07044 | 0.0008   | 0.44923  | 440.3  | 6.1                | 438.8 | 4.8      | 473   | 32       | 438.8    | 4.8      | 0.3          | Single Age   |  |  |  |  |  |
| SMB11_24.FIN2                            | 31.5  | 0.743   |      | 2.13            | 0.17     | 0.1697  | 0.0019   | 0.2448   | 1126   | 42                 | 1010  | 11       | 1330  | 100      | DISC     | DISC     | 24.1         | Single Age   |  |  |  |  |  |
| SMB11_25.FIN2                            | 4630  | 0.06276 |      | 0.3285          | 0.0038   | 0.04359 | 0.0004   | 0.76429  | 288.4  | 2.9                | 275   | 2.7      | 414   | 20       | 275      | 2.7      | 4.6          | Single Age   |  |  |  |  |  |
| SMB11_26.FIN2                            | 201.3 | 0.901   |      | 0.2436          | 0.0039   | 0.03431 | 0.0005   | 0.39345  | 221.3  | 3.2                | 217.5 | 3        | 264   | 37       | 217.5    | 3        | 1.7          | Single Age   |  |  |  |  |  |
| SMB11_27.FIN2                            | 239.7 | 1.59    |      | 0.5596          | 0.0094   | 0.0708  | 0.001    | 0.0269   | 451    | 6.1                | 441.2 | 6.1      | 506   | 44       | 441.2    | 6.1      | 2.2          | Single Age   |  |  |  |  |  |
| SMB11_30.FIN2                            | 166   | 1.87    |      | 0.893           | 0.016    | 0.1059  | 0.0011   | 0.35348  | 647.2  | 8.5                | 648.9 | 6.5      | 639   | 29       | 648.9    | 6.5      | 0.3          | Single Age   |  |  |  |  |  |
| SMB11_31.FIN2                            | 362.4 | 1.309   |      | 7.01            | 0.1      | 0.3852  | 0.0056   | 0.83731  | 2117   | 13                 | 2100  | 26       | 2128  | 15       | 2128     | 15       | 1.3          | Single Age   |  |  |  |  |  |
| SMB11_33.FIN2                            | 85.1  | 1.127   |      | 2.216           | 0.046    | 0.1973  | 0.0045   | 0.62838  | 1189   | 14                 | 1161  | 24       | 1209  | 37       | 1209     | 37       | 4.0          | Single Age   |  |  |  |  |  |
| SMB11_35.FIN2                            | 550   | 6.41    |      | 0.3907          | 0.0048   | 0.05287 | 0.0006   | 0.3478   | 334.7  | 3.5                | 332.1 | 3.4      | 350   | 29       | 332.1    | 3.4      | 0.8          | Single Age   |  |  |  |  |  |
| SMB11_36.FIN2                            | 242   | 0.318   |      | 0.3811          | 0.0061   | 0.05168 | 0.0006   | 0.27328  | 327.7  | 4.5                | 324.8 | 3.6      | 345   | 37       | 324.8    | 3.6      | 0.9          | Single Age   |  |  |  |  |  |
| SMB11_37.FIN2                            | 179   | 1.546   |      | 0.553           | 0.014    | 0.0694  | 0.0014   | 0.60172  | 446.8  | 9.3                | 432.8 | 8.7      | 494   | 45       | 432.8    | 8.7      | 3.1          | Single Age   |  |  |  |  |  |
| SMB11_38.FIN2                            | 75    | 1.252   |      | 2.746           | 0.081    | 0.2243  | 0.0081   | 0.58722  | 1339   | 22                 | 1303  | 42       | 1372  | 55       | 1372     | 55       | 5.0          | Single Age   |  |  |  |  |  |
| SMB11_39.FIN2                            | 623   | 0.0091  |      | 0.559           | 0.015    | 0.0672  | 0.0011   | 0.57466  | 449.8  | 9.9                | 419.2 | 6.5      | 609   | 48       | 419.2    | 6.5      | 6.8          | Single Age   |  |  |  |  |  |
| SMB11_40.FIN2                            | 159.6 | 1.032   |      | 3.968           | 0.045    | 0.2765  | 0.0031   | 0.71539  | 1627.3 | 9.3                | 1574  | 15       | 1682  | 16       | 1682     | 16       | 6.4          | Single Age   |  |  |  |  |  |
| SMB11_41.FIN2                            | 1279  | 1.255   |      | 3.556           | 0.039    | 0.2193  | 0.0025   | 0.70015  | 1539.5 | 8.7                | 1278  | 13       | 1923  | 16       | DISC     | DISC     | 33.5         | Single Age   |  |  |  |  |  |
| SMB11_43.FIN2                            | 56.9  | 3.05    |      | 0.759           | 0.02     | 0.09117 | 0.0009   | 0.21697  | 572    | 11                 | 562.4 | 5        | 603   | 58       | 562.4    | 5        | 1.7          | Single Age   |  |  |  |  |  |
| SMB11_44.FIN2                            | 555   | 1.476   |      | 0.394           | 0.011    | 0.0503  | 0.001    | 0.49093  | 339    | 8.7                | 316.3 | 6.2      | 510   | 58       | 316.3    | 6.2      | 6.7          | Single Age   |  |  |  |  |  |
| SMB11_46.FIN2                            | 219   | 1.079   |      | 0.3877          | 0.0085   | 0.05136 | 0.0009   | 0.32549  | 332.5  | 6.2                | 322.9 | 5.4      | 423   | 55       | 322.9    | 5.4      | 2.9          | Single Age   |  |  |  |  |  |
| SMB11_47.FIN2                            | 155.3 | 1.718   |      | 0.431           | 0.01     | 0.05731 | 0.001    | 0.14046  | 363.3  | 7.2                | 359.2 | 6        | 386   | 56       | 359.2    | 6        | 1.1          | Single Age   |  |  |  |  |  |
| SMB11_49.FIN2                            | 213   | 2.188   |      | 3.387           | 0.057    | 0.2597  | 0.0039   | 0.73471  | 1502   | 13                 | 1488  | 20       | 1539  | 18       | 1539     | 18       | 3.3          | Single Age   |  |  |  |  |  |
| SMB11_50.FIN2                            | 103.4 | 1.8     |      | 0.662           | 0.018    | 0.0757  | 0.0018   | 0.31549  | 515    | 11                 | 471   | 11       | 717   | 64       | 471      | 11       | 8.5          | Single Age   |  |  |  |  |  |
| SMB11_51.FIN2                            | 175.2 | 1.363   |      | 0.933           | 0.026    | 0.1078  | 0.0015   | 0.15763  | 668    | 13                 | 659.7 | 8.4      | 713   | 52       | 659.7    | 8.4      | 1.2          | Single Age   |  |  |  |  |  |
| SMB11_57.FIN2                            | 59.7  | 0.943   |      | 5.48            | 0.08     | 0.3411  | 0.0048   | 0.45668  | 1896   | 13                 | 1891  | 23       | 1922  | 20       | 1922     | 20       | 1.6          | Single Age   |  |  |  |  |  |
| SMB11_58.FIN2                            | 143.2 | 6.66    |      | 0.39            | 0.0081   | 0.05254 | 0.0006   | 0.14738  | 334.1  | 5.9                | 330.1 | 3.8      | 371   | 48       | 330.1    | 3.8      | 1.2          | Single Age   |  |  |  |  |  |
| SMB11_59.FIN2                            | 206.1 | 0.842   |      | 0.441           | 0.02     | 0.05581 | 0.0007   | 0.13116  | 370    | 13                 | 350.1 | 4        | 458   | 66       | 350.1    | 4        | 5.4          | Single Age   |  |  |  |  |  |
| SMB11_60.FIN2                            | 548   | 1.887   |      | 0.6559          | 0.0087   | 0.0827  | 0.0013   | 0.15665  | 511.9  | 5.4                | 512.3 | 8        | 540   | 40       | 512.3    | 8        | 0.1          | Single Age   |  |  |  |  |  |
| SMB11_64.FIN2                            | 1363  | 1.896   |      | 0.3402          | 0.0061   | 0.04676 | 0.0005   | 0.40492  | 297.2  | 4.6                | 294.6 | 3.3      | 333   | 30       | 294.6    | 3.3      | 0.9          | Single Age   |  |  |  |  |  |
| SMB11_65.FIN2                            | 72    | 0.947   |      | 1.995           | 0.042    | 0.1872  | 0.0024   | 0.53645  | 1113   | 14                 | 1106  | 13       | 1136  | 38       | 1136     | 38       | 2.6          | Single Age   |  |  |  |  |  |
| SMB11_66.FIN2                            | 102.8 | 0.556   |      | 0.411           | 0.021    | 0.0526  | 0.0009   | 0.13525  | 348    | 14                 | 330.5 | 5.7      | 450   | 100      | 330.5    | 5.7      | 5.0          | Single Age   |  |  |  |  |  |
| SMB11_68.FIN2                            | 221   | 0.886   |      | 0.825           | 0.013    | 0.1005  | 0.0015   | 0.3737   | 610.2  | 7.2                | 617.5 | 8.7      | 592   | 35       | 617.5    | 8.7      | 1.2          | Single Age   |  |  |  |  |  |
| SMB11_69.FIN2                            | 152   | 3.48    |      | 0.875           | 0.016    | 0.1038  | 0.0015   | 0.34602  | 637.7  | 8.4                | 636.3 | 8.8      | 633   | 36       | 636.3    | 8.8      | 0.2          | Single Age   |  |  |  |  |  |

|                |       |         |        |        |         |        |         |        |     |        |     |      |    |       |      |      |            |
|----------------|-------|---------|--------|--------|---------|--------|---------|--------|-----|--------|-----|------|----|-------|------|------|------------|
| SMB11_70.FIN2  | 136   | 2.23    | 0.5621 | 0.0086 | 0.07304 | 0.0008 | 0.40824 | 452.6  | 5.6 | 454.4  | 4.7 | 445  | 33 | 454.4 | 4.7  | 0.4  | Single Age |
| SMB11_71.FIN2  | 794   | 1.486   | 0.3404 | 0.0032 | 0.04668 | 0.0004 | 0.18146 | 297.5  | 2.5 | 294.1  | 2.4 | 320  | 26 | 294.1 | 2.4  | 1.1  | Single Age |
| SMB11_74.FIN2  | 3764  | 0.0504  | 0.3564 | 0.0066 | 0.04761 | 0.001  | 0.89336 | 309.4  | 5   | 299.8  | 6   | 365  | 20 | 299.8 | 6    | 3.1  | Single Age |
| SMB11_77.FIN2  | 314   | 2.981   | 0.3674 | 0.0055 | 0.05029 | 0.0006 | 0.29243 | 317.7  | 4.1 | 316.3  | 3.3 | 328  | 36 | 316.3 | 3.3  | 0.4  | Single Age |
| SMB11_79.FIN2  | 158.6 | 1.321   | 0.3881 | 0.009  | 0.05257 | 0.0008 | 0.33936 | 333.7  | 6.8 | 330.2  | 4.8 | 347  | 49 | 330.2 | 4.8  | 1.0  | Single Age |
| SMB11_81.FIN2  | 176   | 0.728   | 0.5584 | 0.0097 | 0.07311 | 0.0009 | 0.47516 | 450.1  | 6.3 | 454.8  | 5.4 | 419  | 33 | 454.8 | 5.4  | 1.0  | Single Age |
| SMB11_84.FIN2  | 132.5 | 1.64    | 0.455  | 0.016  | 0.05962 | 0.0009 | 0.37242 | 380    | 11  | 373.3  | 5.6 | 401  | 70 | 373.3 | 5.6  | 1.8  | Rim        |
| SMB11_84.FIN2  | 134.4 | 1.923   | 0.525  | 0.01   | 0.0687  | 0.0011 | 0.26329 | 428.1  | 6.8 | 428.6  | 6.8 | 430  | 47 | 428.6 | 6.8  | 0.1  | Core       |
| SMB11_85.FIN2  | 722   | 13.7    | 0.448  | 0.016  | 0.0594  | 0.0012 | 0.34356 | 376    | 11  | 372    | 7.6 | 382  | 79 | 372   | 7.6  | 1.1  | Rim        |
| SMB11_85.FIN2  | 203   | 1.124   | 0.636  | 0.012  | 0.08218 | 0.0009 | 0.42934 | 499.8  | 7.5 | 509.1  | 5.3 | 472  | 35 | 509.1 | 5.3  | 1.9  | Core       |
| SMB11_86.FIN2  | 169.8 | 1.322   | 0.4165 | 0.0087 | 0.05544 | 0.0008 | 0.31947 | 353.3  | 6.2 | 347.8  | 4.8 | 388  | 42 | 347.8 | 4.8  | 1.6  | Single Age |
| SMB11_89.FIN2  | 313   | 2.52    | 0.3443 | 0.0042 | 0.04731 | 0.0004 | 0.17557 | 300.7  | 3.2 | 298    | 2.7 | 323  | 31 | 298   | 2.7  | 0.9  | Single Age |
| SMB11_90.FIN2  | 75.7  | 0.4355  | 0.429  | 0.012  | 0.05587 | 0.0009 | 0.36083 | 362.5  | 8.5 | 350.4  | 5.6 | 403  | 67 | 350.4 | 5.6  | 3.3  | Single Age |
| SMB11_91.FIN2  | 309   | 1.268   | 2.18   | 0.026  | 0.2007  | 0.0018 | 0.61943 | 1174.2 | 7.9 | 1178.7 | 9.8 | 1165 | 22 | 1165  | 22   | 1.2  | Single Age |
| SMB11_92.FIN2  | 260   | 6.18    | 0.632  | 0.017  | 0.0807  | 0.0014 | 0.56299 | 497    | 11  | 500.4  | 8.4 | 490  | 64 | 500.4 | 8.4  | 0.7  | Single Age |
| SMB11_94.FIN2  | 916   | 0.0123  | 0.3565 | 0.004  | 0.04759 | 0.0005 | 0.47384 | 309.6  | 3   | 299.7  | 3.2 | 374  | 26 | 299.7 | 3.2  | 3.2  | Single Age |
| SMB11_96.FIN2  | 171   | 0.485   | 0.4147 | 0.0059 | 0.05647 | 0.0005 | 0.35941 | 352.1  | 4.2 | 354.1  | 3.2 | 338  | 30 | 354.1 | 3.2  | 0.6  | Single Age |
| SMB11_97.FIN2  | 4070  | 0.04502 | 0.4289 | 0.0033 | 0.04723 | 0.0005 | 0.86063 | 362.3  | 2.4 | 297.5  | 2.9 | 803  | 11 | DISC  | DISC | 17.9 | Single Age |
| SMB11_99.FIN2  | 66.7  | 1.44    | 0.871  | 0.018  | 0.1077  | 0.0029 | 0.41167 | 641    | 11  | 659    | 17  | 565  | 56 | 659   | 17   | 2.8  | Single Age |
| SMB11_100.FIN2 | 798   | 1.428   | 0.3459 | 0.0029 | 0.04814 | 0.0005 | 0.51004 | 301.6  | 2.2 | 303.1  | 2.9 | 307  | 19 | 303.1 | 2.9  | 0.5  | Single Age |
| SMB11_101.FIN2 | 80.4  | 2.258   | 0.3541 | 0.0097 | 0.04797 | 0.0008 | 0.23998 | 308.3  | 7.1 | 302    | 5.1 | 339  | 58 | 302   | 5.1  | 2.0  | Single Age |
| SMB11_103.FIN2 | 118.4 | 1.026   | 0.3447 | 0.0069 | 0.04729 | 0.0007 | 0.35599 | 300.5  | 5.2 | 297.8  | 4.1 | 307  | 43 | 297.8 | 4.1  | 0.9  | Single Age |
| SMB11_115.FIN2 | 102.5 | 2.163   | 0.3757 | 0.0099 | 0.04708 | 0.0008 | 0.46682 | 323.5  | 7.3 | 296.5  | 5.1 | 544  | 48 | 296.5 | 5.1  | 8.3  | Single Age |
| SMB11_118.FIN2 | 1450  | 0.0164  | 0.497  | 0.0078 | 0.06346 | 0.0008 | 0.73713 | 409.6  | 5.3 | 396.6  | 4.9 | 479  | 19 | 396.6 | 4.9  | 3.2  | Single Age |
| SMB11_119.FIN2 | 253   | 6.97    | 0.5687 | 0.0085 | 0.07352 | 0.0008 | 0.17168 | 456.9  | 5.4 | 457.3  | 4.7 | 439  | 31 | 457.3 | 4.7  | 0.1  | Single Age |
| SMB11_120.FIN2 | 4870  | 0.08353 | 0.4633 | 0.0043 | 0.05819 | 0.0006 | 0.82772 | 386.5  | 3   | 364.6  | 3.5 | 515  | 12 | 364.6 | 3.5  | 5.7  | Single Age |

| Sample Name: 10SMB12             |       |        | Isotopic Ratios |        |          |         |          | Apparent Ages (Ma) |        |          |       |          |       |          |       |          |          |          |              |              |
|----------------------------------|-------|--------|-----------------|--------|----------|---------|----------|--------------------|--------|----------|-------|----------|-------|----------|-------|----------|----------|----------|--------------|--------------|
| Lower Marine Molasse (32 ± 1 Ma) |       |        |                 |        |          |         |          |                    |        |          |       |          |       |          |       |          |          |          |              |              |
|                                  |       | U      | U/Th            | 207Pb  | 2σ error | 206Pb   | 2σ error | Error              | 207Pb  | 2σ error | 206Pb | 2σ error | 207Pb | 2σ error | 206Pb | 2σ error | Best age | 2σ error | Discordance* | Rim, Core or |
| Grain #                          |       | (ppm)  |                 | 235U   | (abs.)   | 238U    | (abs.)   | Corr.              | 235U   | (Ma)     | 238U  | (Ma)     | 207Pb | (Ma)     | 206Pb | (Ma)     | (Ma)     | (Ma)     | %            | Single Age   |
| SMB12_1.FIN2                     | 447   | 2.389  |                 | 0.565  | 0.023    | 0.072   | 0.0023   | 0.92673            | 454    | 15       | 448   | 14       | 493   | 35       | 448   | 14       | 448      | 14       | 1.3          | Rim          |
| SMB12_1.FIN2                     | 74.3  | 0.891  |                 | 1.527  | 0.036    | 0.1588  | 0.0038   | 0.4912             | 940    | 14       | 950   | 21       | 910   | 39       | 910   | 39       | 910      | 39       | 4.4          | Core         |
| SMB12_2.FIN2                     | 227   | 0.728  |                 | 0.3167 | 0.0073   | 0.04399 | 0.0008   | 0.64059            | 279.2  | 5.6      | 277.5 | 5.1      | 307   | 41       | 277.5 | 5.1      | 277.5    | 5.1      | 0.6          | Single Age   |
| SMB12_3.FIN2                     | 426.9 | 5.676  |                 | 0.73   | 0.015    | 0.0761  | 0.0012   | 0.60574            | 556.5  | 8.7      | 472.5 | 7        | 900   | 39       | DISC  | DISC     | DISC     | DISC     | 15.1         | Single Age   |
| SMB12_4.FIN2                     | 70    | 0.667  |                 | 1.839  | 0.025    | 0.1792  | 0.0019   | 0.57645            | 1058.9 | 8.9      | 1062  | 11       | 1052  | 21       | 1052  | 21       | 1052     | 21       | 1.0          | Single Age   |
| SMB12_6.FIN2                     | 397   | 6.72   |                 | 0.372  | 0.0049   | 0.05074 | 0.0005   | 0.65083            | 321    | 3.6      | 319   | 3.3      | 338   | 25       | 319   | 3.3      | 319      | 3.3      | 0.6          | Single Age   |
| SMB12_7.FIN2                     | 191   | 1.43   |                 | 1.025  | 0.013    | 0.1176  | 0.0015   | 0.58449            | 716    | 6.7      | 716.4 | 8.6      | 718   | 27       | 716.4 | 8.6      | 716.4    | 8.6      | 0.1          | Single Age   |
| SMB12_9.FIN2                     | 121   | 3.34   |                 | 0.5474 | 0.0073   | 0.0705  | 0.0007   | 0.12461            | 443.1  | 4.8      | 439.1 | 4        | 460   | 35       | 439.1 | 4        | 439.1    | 4        | 0.9          | Single Age   |
| SMB12_10.FIN2                    | 41.6  | 0.3639 |                 | 0.351  | 0.016    | 0.0475  | 0.0014   | 0.18782            | 305    | 12       | 299.2 | 8.6      | 330   | 100      | 299.2 | 8.6      | 299.2    | 8.6      | 1.9          | Single Age   |
| SMB12_11.FIN2                    | 312   | 2.7    |                 | 0.5721 | 0.0086   | 0.073   | 0.0012   | 0.74825            | 459.3  | 5.6      | 454.3 | 7        | 470   | 33       | 454.3 | 7        | 454.3    | 7        | 1.1          | Single Age   |
| SMB12_12.FIN2                    | 1603  | 1.384  |                 | 0.2788 | 0.0027   | 0.03889 | 0.0004   | 0.58545            | 249.7  | 2.2      | 246   | 2.2      | 271   | 19       | 246   | 2.2      | 246      | 2.2      | 1.5          | Single Age   |
| SMB12_14.FIN2                    | 66.5  | 1.558  |                 | 0.767  | 0.013    | 0.0915  | 0.0013   | 0.34018            | 578.7  | 7.5      | 564.2 | 7.8      | 626   | 36       | 564.2 | 7.8      | 564.2    | 7.8      | 2.5          | Single Age   |
| SMB12_16.FIN2                    | 82    | 0.839  |                 | 0.766  | 0.013    | 0.0928  | 0.0011   | 0.24935            | 577    | 7.2      | 572.2 | 6.2      | 570   | 38       | 572.2 | 6.2      | 572.2    | 6.2      | 0.8          | Single Age   |
| SMB12_17.FIN2                    | 173.6 | 3.757  |                 | 4.809  | 0.073    | 0.3319  | 0.0043   | 0.39178            | 1786   | 13       | 1848  | 21       | 1711  | 25       | 1711  | 25       | 1711     | 25       | 8.0          | Single Age   |
| SMB12_18.FIN2                    | 517   | 0.8177 |                 | 0.7457 | 0.0088   | 0.0899  | 0.001    | 0.6077             | 566.6  | 4.9      | 554.7 | 6.1      | 612   | 25       | 554.7 | 6.1      | 554.7    | 6.1      | 2.1          | Single Age   |
| SMB12_19.FIN2                    | 395.5 | 2.04   |                 | 0.5818 | 0.0098   | 0.0737  | 0.0008   | 0.34511            | 465.5  | 6.3      | 458.4 | 4.7      | 491   | 35       | 458.4 | 4.7      | 458.4    | 4.7      | 1.5          | Single Age   |
| SMB12_20.FIN2                    | 618.1 | 4.81   |                 | 4.772  | 0.038    | 0.3083  | 0.0024   | 0.77307            | 1780.8 | 6.8      | 1732  | 12       | 1830  | 10       | 1830  | 10       | 1830     | 10       | 5.4          | Single Age   |
| SMB12_21.FIN2                    | 389   | 0.92   |                 | 0.2895 | 0.0048   | 0.0412  | 0.0005   | 0.27025            | 258.1  | 3.8      | 260.3 | 3        | 258   | 45       | 260.3 | 3        | 260.3    | 3        | 0.9          | Single Age   |
| SMB12_24.FIN2                    | 124.6 | 1.884  |                 | 3.129  | 0.048    | 0.2482  | 0.004    | 0.50441            | 1442   | 12       | 1429  | 21       | 1467  | 30       | 1467  | 30       | 1467     | 30       | 2.6          | Single Age   |
| SMB12_25.FIN2                    | 54.8  | 1.508  |                 | 1.9    | 0.11     | 0.179   | 0.011    | 0.93734            | 1075   | 39       | 1070  | 62       | 1113  | 40       | 1113  | 40       | 1113     | 40       | 3.9          | Single Age   |
| SMB12_26.FIN2                    | 187   | 1.805  |                 | 0.496  | 0.012    | 0.0662  | 0.0013   | 0.40096            | 409    | 7.9      | 412.9 | 7.7      | 394   | 45       | 412.9 | 7.7      | 412.9    | 7.7      | 1.0          | Single Age   |
| SMB12_27.FIN2                    | 96.5  | 0.835  |                 | 0.741  | 0.02     | 0.0881  | 0.0023   | 0.45002            | 563    | 11       | 544   | 14       | 656   | 55       | 544   | 14       | 544      | 14       | 3.4          | Single Age   |
| SMB12_29.FIN2                    | 209.7 | 10.31  |                 | 0.6202 | 0.0076   | 0.07863 | 0.0007   | 0.26536            | 489.8  | 4.7      | 487.9 | 4.3      | 505   | 32       | 487.9 | 4.3      | 487.9    | 4.3      | 0.4          | Single Age   |
| SMB12_30.FIN2                    | 236   | 4.48   |                 | 0.625  | 0.018    | 0.0795  | 0.0016   | 0.88781            | 493    | 11       | 493   | 9.4      | 513   | 33       | 493   | 9.4      | 493      | 9.4      | 0.0          | Single Age   |
| SMB12_31.FIN2                    | 36.2  | 0.666  |                 | 4.45   | 0.17     | 0.2856  | 0.0061   | 0.75006            | 1717   | 28       | 1619  | 31       | 1847  | 56       | 1847  | 56       | 1847     | 56       | 12.3         | Single Age   |
| SMB12_32.FIN2                    | 157.4 | 21.7   |                 | 1.707  | 0.019    | 0.1647  | 0.0016   | 0.63564            | 1011.8 | 6.9      | 982.6 | 8.6      | 1072  | 21       | 1072  | 21       | 1072     | 21       | 8.3          | Single Age   |
| SMB12_34.FIN2                    | 246   | 1.27   |                 | 0.653  | 0.029    | 0.07721 | 0.0007   | 0.12379            | 508    | 16       | 479.4 | 4.1      | 579   | 56       | 479.4 | 4.1      | 479.4    | 4.1      | 5.6          | Single Age   |
| SMB12_37.FIN2                    | 290   | 0.631  |                 | 0.699  | 0.011    | 0.0855  | 0.0012   | 0.59065            | 537.9  | 6.7      | 528.6 | 7.1      | 573   | 33       | 528.6 | 7.1      | 528.6    | 7.1      | 1.7          | Single Age   |
| SMB12_39.FIN2                    | 541   | 16.3   |                 | 0.3994 | 0.0058   | 0.0535  | 0.0007   | 0.69418            | 341.1  | 4.2      | 336   | 4.2      | 362   | 26       | 336   | 4.2      | 336      | 4.2      | 1.5          | Single Age   |
| SMB12_40.FIN2                    | 271   | 7      |                 | 0.731  | 0.018    | 0.0875  | 0.0011   | 0.10146            | 556    | 10       | 540.6 | 6.8      | 603   | 42       | 540.6 | 6.8      | 540.6    | 6.8      | 2.8          | Single Age   |
| SMB12_41.FIN2                    | 184   | 0.846  |                 | 0.7789 | 0.009    | 0.09433 | 0.0009   | 0.44494            | 584.7  | 5.1      | 581   | 5.3      | 587   | 26       | 581   | 5.3      | 581      | 5.3      | 0.6          | Single Age   |
| SMB12_42.FIN2                    | 305   | 0.94   |                 | 0.3518 | 0.0047   | 0.04781 | 0.0005   | 0.37061            | 305.9  | 3.5      | 301.1 | 2.8      | 338   | 32       | 301.1 | 2.8      | 301.1    | 2.8      | 1.6          | Single Age   |
| SMB12_43.FIN2                    | 135.5 | 1.364  |                 | 0.812  | 0.023    | 0.0956  | 0.0024   | 0.6164             | 605    | 12       | 588   | 14       | 656   | 47       | 588   | 14       | 588      | 14       | 2.8          | Single Age   |
| SMB12_44.FIN2                    | 343   | 0.858  |                 | 0.3624 | 0.0051   | 0.04867 | 0.0004   | 0.25168            | 313.8  | 3.8      | 306.4 | 2.6      | 349   | 31       | 306.4 | 2.6      | 306.4    | 2.6      | 2.4          | Single Age   |
| SMB12_45.FIN2                    | 79.6  | 11.82  |                 | 0.975  | 0.017    | 0.1113  | 0.0015   | 0.14261            | 690.1  | 9        | 680.1 | 8.9      | 704   | 38       | 680.1 | 8.9      | 680.1    | 8.9      | 1.4          | Single Age   |
| SMB12_46.FIN2                    | 76    | 0.787  |                 | 0.857  | 0.015    | 0.102   | 0.0012   | 0.36403            | 629.9  | 8.3      | 626.1 | 7.2      | 625   | 37       | 626.1 | 7.2      | 626.1    | 7.2      | 0.6          | Single Age   |
| SMB12_48.FIN2                    | 1080  | 1.1    |                 | 0.6129 | 0.0086   | 0.0744  | 0.0013   | 0.78683            | 485.3  | 5.4      | 462.3 | 8.1      | 583   | 21       | 462.3 | 8.1      | 462.3    | 8.1      | 4.7          | Single Age   |
| SMB12_49.FIN2                    | 78.9  | 0.6005 |                 | 0.977  | 0.047    | 0.1102  | 0.0021   | 0.50224            | 691    | 23       | 674   | 12       | 765   | 79       | 674   | 12       | 674      | 12       | 2.5          | Single Age   |
| SMB12_50.FIN2                    | 358   | 2.815  |                 | 1.405  | 0.026    | 0.1441  | 0.0032   | 0.82023            | 890    | 11       | 868   | 18       | 940   | 25       | 940   | 25       | 940      | 25       | 7.7          | Single Age   |
| SMB12_52.FIN2                    | 126   | 2.03   |                 | 1.151  | 0.016    | 0.1235  | 0.0015   | 0.4448             | 777.4  | 7.5      | 750.7 | 8.6      | 862   | 27       | 750.7 | 8.6      | 750.7    | 8.6      | 3.4          | Single Age   |
| SMB12_53.FIN2                    | 938   | 0.807  |                 | 2.911  | 0.09     | 0.1866  | 0.0045   | 0.93783            | 1387   | 25       | 1103  | 25       | 1859  | 21       | 1859  | 21       | 1859     | 21       | 40.7         | Rim          |
| SMB12_53.FIN2                    | 293   | 0.922  |                 | 4.995  | 0.075    | 0.3014  | 0.0041   | 0.83212            | 1818   | 13       | 1698  | 20       | 1971  | 14       | 1971  | 14       | 1971     | 14       | 13.9         | Core         |
| SMB12_54.FIN2                    | 232.9 | 0.788  |                 | 0.3955 | 0.0098   | 0.0538  | 0.0011   | 0.29522            | 338.2  | 7.1      | 337.9 | 6.6      | 325   | 61       | 337.9 | 6.6      | 337.9    | 6.6      | 0.1          | Rim          |
| SMB12_54.FIN2                    | 137.9 | 1.94   |                 | 0.474  | 0.011    | 0.0646  | 0.0011   | 0.3936             | 393.9  | 7.3      | 403.4 | 6.8      | 349   | 46       | 403.4 | 6.8      | 403.4    | 6.8      | 2.4          | Core         |
| SMB12_56.FIN2                    | 1220  | 17.3   |                 | 0.438  | 0.036    | 0.0569  | 0.0033   | 0.86218            | 368    | 26       | 357   | 20       | 399   | 63       | 357   | 20       | 357      | 20       | 3.0          | Rim          |
| SMB12_56.FIN2                    | 101.3 | 1.15   |                 | 0.622  | 0.012    | 0.07734 | 0.0009   | 0.035352           | 490.9  | 7.2      | 480.2 | 5.1      | 512   | 47       | 480.2 | 5.1      | 480.2    | 5.1      | 2.2          | Core         |
| SMB12_57.FIN2                    | 67.1  | 0.593  |                 | 0.784  | 0.013    | 0.0944  | 0.001    | 0.32112            | 587.9  | 7.2      | 581.5 | 5.9      | 602   | 34       | 581.5 | 5.9      | 581.5    | 5.9      | 1.1          | Single Age   |
| SMB12_58.FIN2                    | 24    | 2.66   |                 | 6.18   | 0.25     | 0.3444  | 0.0072   | 0.83751            | 1992   | 35       | 1910  | 34       | 2073  | 38       | 2073  | 38       | 2073     | 38       | 7.9          | Single Age   |
| SMB12_59.FIN2                    | 327   | 1.233  |                 | 0.0377 | 0.0019   | 0.00564 | 8E-05    | 0.032832           | 37.5   | 1.9      | 36.26 | 0.52     | 81    | 88       | 36.26 | 0.52     | 36.26    | 0.52     | 3.3          | Single Age   |
| SMB12_60.FIN2                    | 118   | 4.31   |                 | 0.4032 | 0.0079   | 0.05294 | 0.0006   | 0.04531            | 344.4  | 5.6      | 332.5 | 3.5      | 409   | 48       | 332.5 | 3.5      | 332.5    | 3.5      | 3.5          | Single Age   |
| SMB12_61.FIN2                    | 86.8  | 48.2   |                 | 1.957  | 0.045    | 0.1865  | 0.004    | 0.78844            | 1099   | 16       | 1106  | 23       | 1078  | 26       | 1078  | 26       | 1078     | 26       | 2.6          | Single Age   |
| SMB12_62.FIN2                    | 83.5  | 1.367  |                 | 6.622  | 0.065    | 0.3641  | 0.0044   | 0.60437            | 2062   | 8.6      | 2001  | 21       | 2118  | 16       | 2118  | 16       | 2118     | 16       | 5.5          | Single Age   |
| SMB12_63.FIN2                    | 168   | 0.625  |                 | 0.804  | 0        |         |          |                    |        |          |       |          |       |          |       |          |          |          |              |              |

|                |       |         |        |        |         |        |          |        |     |       |     |      |    |       |      |      |            |
|----------------|-------|---------|--------|--------|---------|--------|----------|--------|-----|-------|-----|------|----|-------|------|------|------------|
| SMB12_75.FIN2  | 335.3 | 0.384   | 0.726  | 0.014  | 0.0878  | 0.0013 | 0.6089   | 554.1  | 8.1 | 542.2 | 7.9 | 619  | 33 | 542.2 | 7.9  | 2.1  | Single Age |
| SMB12_76.FIN2  | 700   | 2.07    | 0.6796 | 0.0069 | 0.076   | 0.0012 | 0.55233  | 526.4  | 4.1 | 472.3 | 6.9 | 811  | 26 | DISC  | DISC | 10.3 | Single Age |
| SMB12_77.FIN2  | 44.2  | 0.3833  | 3.411  | 0.051  | 0.2659  | 0.0029 | 0.38794  | 1506   | 12  | 1520  | 15  | 1504 | 28 | 1504  | 28   | 1.1  | Single Age |
| SMB12_78.FIN2  | 995   | 40.9    | 0.465  | 0.02   | 0.04913 | 0.0006 | 0.098208 | 387    | 14  | 309.2 | 3.5 | 900  | 93 | DISC  | DISC | 20.1 | Single Age |
| SMB12_79.FIN2  | 717   | 1.431   | 0.3822 | 0.0053 | 0.0523  | 0.0007 | 0.48001  | 328.6  | 3.9 | 328.6 | 4   | 364  | 35 | 328.6 | 4    | 0.0  | Single Age |
| SMB12_81.FIN2  | 192   | 0.993   | 0.897  | 0.018  | 0.1075  | 0.0014 | 0.70999  | 649.3  | 9.5 | 658.2 | 8.1 | 631  | 26 | 658.2 | 8.1  | 1.4  | Single Age |
| SMB12_82.FIN2  | 194.5 | 2.105   | 0.506  | 0.014  | 0.0622  | 0.0019 | 0.47807  | 415.6  | 9.6 | 389   | 11  | 630  | 60 | 389   | 11   | 6.4  | Single Age |
| SMB12_83.FIN2  | 118.2 | 2.147   | 2.149  | 0.029  | 0.1996  | 0.003  | 0.26768  | 1163.8 | 9.3 | 1173  | 16  | 1146 | 30 | 1146  | 30   | 2.4  | Single Age |
| SMB12_84.FIN2  | 334   | 54.3    | 12.43  | 0.14   | 0.485   | 0.009  | 0.48778  | 2637   | 10  | 2557  | 37  | 2702 | 26 | 2702  | 26   | 5.4  | Single Age |
| SMB12_85.FIN2  | 139   | 1.003   | 0.804  | 0.01   | 0.0976  | 0.001  | 0.48713  | 598.8  | 5.9 | 600.3 | 5.7 | 603  | 26 | 600.3 | 5.7  | 0.3  | Single Age |
| SMB12_86.FIN2  | 379   | 14.4    | 0.694  | 0.018  | 0.0859  | 0.0022 | 0.80891  | 535    | 11  | 535   | 12  | 572  | 35 | 535   | 12   | 0.0  | Single Age |
| SMB12_87.FIN2  | 114   | 1.012   | 0.482  | 0.011  | 0.06295 | 0.0008 | 0.3342   | 399    | 7.5 | 393.5 | 4.7 | 415  | 50 | 393.5 | 4.7  | 1.4  | Single Age |
| SMB12_88.FIN2  | 358   | 2.61    | 0.5598 | 0.0075 | 0.07308 | 0.0008 | 0.43551  | 451.3  | 4.9 | 454.7 | 4.6 | 458  | 31 | 454.7 | 4.6  | 0.8  | Single Age |
| SMB12_89.FIN2  | 199.7 | 2.067   | 4.862  | 0.061  | 0.2902  | 0.0038 | 0.78182  | 1795   | 11  | 1642  | 19  | 1985 | 14 | 1985  | 14   | 17.3 | Single Age |
| SMB12_91.FIN2  | 1744  | 3.59    | 0.667  | 0.029  | 0.071   | 0.0034 | 0.90491  | 519    | 18  | 442   | 21  | 886  | 47 | DISC  | DISC | 14.8 | Rim        |
| SMB12_91.FIN2  | 859   | 4.614   | 1.381  | 0.015  | 0.1464  | 0.0028 | 0.74165  | 880.6  | 6.3 | 881   | 16  | 891  | 23 | 891   | 23   | 1.1  | Core       |
| SMB12_92.FIN2  | 1237  | 0.0101  | 0.3461 | 0.0033 | 0.0466  | 0.0005 | 0.46291  | 301.7  | 2.5 | 293.6 | 3.3 | 384  | 25 | 293.6 | 3.3  | 2.7  | Single Age |
| SMB12_93.FIN2  | 3050  | 0.04493 | 0.4289 | 0.0051 | 0.04329 | 0.0007 | 0.61089  | 362.3  | 3.6 | 273.2 | 4.2 | 995  | 22 | DISC  | DISC | 24.6 | Single Age |
| SMB12_95.FIN2  | 254   | 1.45    | 4.083  | 0.035  | 0.2905  | 0.0023 | 0.61006  | 1650.7 | 6.9 | 1644  | 12  | 1665 | 14 | 1665  | 14   | 1.3  | Single Age |
| SMB12_96.FIN2  | 993   | 8.6     | 0.839  | 0.041  | 0.0848  | 0.0023 | 0.72803  | 617    | 23  | 525   | 14  | 977  | 66 | DISC  | DISC | 14.9 | Rim        |
| SMB12_96.FIN2  | 190   | 0.836   | 1.748  | 0.022  | 0.1718  | 0.0021 | 0.52666  | 1026.1 | 8.2 | 1022  | 12  | 1047 | 24 | 1047  | 24   | 2.4  | Core       |
| SMB12_97.FIN2  | 254   | 9.96    | 0.649  | 0.02   | 0.0809  | 0.002  | 0.70809  | 508    | 12  | 501   | 12  | 534  | 49 | 501   | 12   | 1.4  | Single Age |
| SMB12_100.FIN2 | 133.5 | 2.039   | 1.984  | 0.035  | 0.1839  | 0.0037 | 0.55888  | 1109   | 12  | 1088  | 20  | 1158 | 33 | 1158  | 33   | 6.0  | Single Age |
| SMB12_101.FIN2 | 144   | 2.289   | 6.897  | 0.078  | 0.3873  | 0.0054 | 0.79191  | 2097   | 10  | 2109  | 25  | 2081 | 16 | 2081  | 16   | 1.3  | Single Age |
| SMB12_103.FIN2 | 3620  | 3.75    | 0.3193 | 0.0023 | 0.04327 | 0.0003 | 0.7133   | 281.4  | 1.8 | 273   | 2.1 | 354  | 14 | 273   | 2.1  | 3.0  | Single Age |
| SMB12_104.FIN2 | 150   | 1.993   | 0.967  | 0.021  | 0.1044  | 0.0014 | 0.1558   | 686    | 11  | 639.9 | 8.4 | 829  | 40 | 639.9 | 8.4  | 6.7  | Single Age |
| SMB12_105.FIN2 | 231.7 | 0.697   | 0.819  | 0.011  | 0.0987  | 0.0014 | 0.5833   | 607.3  | 6.2 | 606.4 | 8.1 | 624  | 26 | 606.4 | 8.1  | 0.1  | Single Age |
| SMB12_106.FIN2 | 75.12 | 1.615   | 3.565  | 0.05   | 0.2703  | 0.0042 | 0.58842  | 1541   | 11  | 1542  | 21  | 1556 | 24 | 1556  | 24   | 0.9  | Single Age |
| SMB12_107.FIN2 | 371   | 0.7575  | 1.391  | 0.019  | 0.1465  | 0.0013 | 0.37756  | 882.5  | 6.8 | 881   | 7.3 | 903  | 19 | 903   | 19   | 2.4  | Single Age |
| SMB12_109.FIN2 | 486   | 1.61    | 0.3697 | 0.0061 | 0.04901 | 0.0005 | 0.3677   | 319.3  | 4.5 | 308.4 | 3.3 | 387  | 33 | 308.4 | 3.3  | 3.4  | Single Age |
| SMB12_110.FIN2 | 210.8 | 0.686   | 0.8551 | 0.0099 | 0.1032  | 0.0014 | 0.53655  | 627.2  | 5.4 | 633.1 | 7.9 | 606  | 23 | 633.1 | 7.9  | 0.9  | Single Age |
| SMB12_111.FIN2 | 442   | 1.543   | 0.4828 | 0.0051 | 0.06376 | 0.0005 | 0.3059   | 399.9  | 3.5 | 398.4 | 2.8 | 399  | 22 | 398.4 | 2.8  | 0.4  | Single Age |
| SMB12_112.FIN2 | 42.7  | 1.253   | 1.193  | 0.028  | 0.1297  | 0.0023 | 0.39123  | 796    | 13  | 786   | 13  | 831  | 49 | 786   | 13   | 1.3  | Single Age |
| SMB12_113.FIN2 | 515   | 0.81    | 0.655  | 0.011  | 0.08103 | 0.001  | 0.8509   | 511.2  | 6.7 | 502.2 | 5.8 | 535  | 18 | 502.2 | 5.8  | 1.8  | Single Age |
| SMB12_114.FIN2 | 848   | 1.56    | 0.357  | 0.0065 | 0.04959 | 0.0009 | 0.75963  | 309.9  | 4.9 | 312   | 5.8 | 293  | 35 | 312   | 5.8  | 0.7  | Rim        |
| SMB12_114.FIN2 | 326   | 1.772   | 0.406  | 0.0077 | 0.05554 | 0.0008 | 0.60444  | 345.9  | 5.6 | 348.4 | 5.1 | 335  | 37 | 348.4 | 5.1  | 0.7  | Core       |
| SMB12_115.FIN2 | 236.9 | 1.828   | 0.299  | 0.0084 | 0.04064 | 0.0005 | 0.07502  | 265.4  | 6.5 | 256.8 | 3.3 | 329  | 66 | 256.8 | 3.3  | 3.2  | Single Age |
| SMB12_116.FIN2 | 280   | 4.95    | 0.545  | 0.012  | 0.0698  | 0.0018 | 0.42447  | 441.6  | 7.6 | 435   | 11  | 448  | 59 | 435   | 11   | 1.5  | Single Age |
| SMB12_117.FIN2 | 73    | 0.955   | 0.4142 | 0.0098 | 0.0549  | 0.0011 | 0.42729  | 351.6  | 7   | 344.4 | 6.7 | 373  | 48 | 344.4 | 6.7  | 2.0  | Single Age |
| SMB12_118.FIN2 | 632   | 1.032   | 0.2995 | 0.0029 | 0.04191 | 0.0004 | 0.56261  | 266.3  | 2.2 | 264.7 | 2.2 | 259  | 20 | 264.7 | 2.2  | 0.6  | Single Age |
| SMB12_120.FIN2 | 82.4  | 1.449   | 1.393  | 0.02   | 0.1472  | 0.0021 | 0.55163  | 885.7  | 8.6 | 885   | 12  | 885  | 27 | 885   | 27   | 0.0  | Single Age |
