# Supplementary material for: Tectonic exhumation of the Central Alps recorded by detrital zircon in the Molasse Basin, Switzerland
Source: Copernicus journal article supplement (doi:10.5194/se-11-2197-2020), 2020-11-23
Supplement: Supplementary file 1 [file se-11-2197-2020-supplement.zip › Table S2.pdf]

## Age vs U/Th Plot Data

| Variscan <21 Ma |       |             | Caledonian and Cadomian <21 |       |             | Variscan >21   |       |             | Caledonian and Cadomian >21 |       |             |
|-----------------|-------|-------------|-----------------------------|-------|-------------|----------------|-------|-------------|-----------------------------|-------|-------------|
| Grain           | Age   | U/Th        | Grain                       | Age   | U/Th        | Grain          | Age   | U/Th        | Grain                       | Age   | U/Th        |
| SFB38_27.FIN2   | 251.7 | 5.914249685 | SFB38_11.FIN2               | 420.2 | 11.62460568 | SFB21_87.FIN2  | 254.7 | 2.796296296 | SFB21_20.FIN2               | 402.0 | 31.77664975 |
| SFB38_78.FIN2   | 253.2 | 4.016326531 | SFB14_C_16.FIN2             | 425.2 | 11.47487844 | SFB21_72.FIN2  | 257.6 | 5.317185698 | SFB21_17.FIN2               | 428.1 | 10.97560976 |
| SFB49_2_14.FIN2 | 256.5 | 1.751269036 | SFB49_2_1.FIN2              | 426   | 5.826086957 | SFB21_114.FIN2 | 270.9 | 3.043243243 | SFB21_53.FIN2               | 442.5 | 13.80108992 |
| SFB33_V_12.FIN2 | 261.5 | 2.627906977 | SFB14_C_14.FIN2             | 427.6 | 8.223140496 | SFB21_44.FIN2  | 274.9 | 2.932642487 | SFB21_28.FIN2               | 444.5 | 2.83047619  |
| SFB14_V_6.FIN2  | 261.7 | 1.224719101 | SFB38_29.FIN2               | 428.3 | 20.13636364 | SFB21_97.FIN2  | 278.0 | 4.455882353 | SFB21_42.FIN2               | 445.2 | 1.345549738 |
| SFB33_V_8.FIN2  | 262.5 | 4.394402036 | SFB38_73.FIN2               | 428.8 | 10.70175439 | SFB21_09.FIN2  | 279.1 | 2.133333333 | SFB21_111.FIN2              | 446.6 | 2.344827586 |
| SFB38_61.FIN2   | 262.9 | 4.982300885 | SFB38_115.FIN2              | 432.7 | 10.6969697  | SFB21_21.FIN2  | 285.7 | 5.324675325 | SFB21_89.FIN2               | 447.6 | 20.25782689 |
| SFB38_30.FIN2   | 263.6 | 3.165467626 | SFB38_21.FIN2               | 433.7 | 4.581005587 | SFB21_98.FIN2  | 289.1 | 1.528023599 | SFB21_12.FIN2               | 448.0 | 17.2519084  |
| SFB38_84.FIN2   | 263.9 | 2.04040404  | SFB38_18.FIN2               | 436.1 | 1.792       | SFB21_59.FIN2  | 290.1 | 3.200295639 | SFB21_03.FIN2               | 448.1 | 26.26176219 |
| SFB38_14.FIN2   | 264.8 | 2.995049505 | SFB38_119.FIN2              | 437.1 | 10.05649718 | SFB21_06.FIN2  | 290.7 | 1.364452424 | SFB21_31.FIN2               | 448.4 | 8.262195122 |
| SFB14_V_17.FIN2 | 266.2 | 2.18370607  | SFB33_C_19.FIN2             | 439.8 | 9.178571429 | SFB21_101.FIN2 | 293.2 | 1.820224719 | SFB21_76.FIN2               | 449.4 | 12.75211451 |
| SFB38_76.FIN2   | 266.8 | 1.207017544 | SFB33_C_3.FIN2              | 440.7 | 2.835820896 | SFB21_29.FIN2  | 293.8 | 4.738853503 | SFB21_73.FIN2               | 450.0 | 4.573304158 |
| SFB33_V_15.FIN2 | 267.5 | 2.302583026 | SFB38_104.FIN2              | 442.1 | 8.370607029 | SFB21_78.FIN2  | 293.8 | 1.528       | SFB21_65.FIN2               | 450.3 | 0.81559633  |
| SFB14_V_19.FIN2 | 270.8 | 40.55555556 | SFB38_108.FIN2              | 443.4 | 3.912790698 | SFB21_35.FIN2  | 295.3 | 3.184210526 | SFB21_109.FIN2              | 452.1 | 13.36065574 |
| SFB33_V_11.FIN2 | 271.6 | 2.06634416  | SFB33_C_6.FIN2              | 443.7 | 3.987012987 | SFB21_95.FIN2  | 297.6 | 5.131578947 | SFB21_62.FIN2               | 452.9 | 2.899563319 |
| SFB38_49.FIN2   | 274   | 3.482587065 | SFB38_26.FIN2               | 447.1 | 9.423929099 | SFB21_61.FIN2  | 299.8 | 2.968061674 | SFB21_106.FIN2              | 456.6 | 2.268817204 |
| SFB33_V_14.FIN2 | 274.4 | 1.830917874 | SFB38_19.FIN2               | 449.5 | 3.435897436 | SFB21_25.FIN2  | 303.0 | 2.771084337 | SFB21_104.FIN2              | 457.6 | 3.892927958 |
| SFB38_25.FIN2   | 276.3 | 2.25        | SFB38_81.FIN2               | 450   | 1.413793103 | SFB21_18.FIN2  | 303.8 | 5.626843658 | SFB21_118.FIN2              | 458.0 | 2.282352941 |
| SFB38_89.FIN2   | 276.3 | 20.6235012  | SFB38_5.FIN2                | 451.5 | 7.623762376 | SFB21_24.FIN2  | 305.4 | 3.140096618 | SFB21_117.FIN2              | 458.4 | 3.798319328 |
| SFB14_V_9.FIN2  | 276.4 | 2.208398134 | SFB38_106.FIN2              | 452.1 | 10.11235955 | SFB21_01.FIN2  | 308.1 | 3.86627907  | SFB21_120.FIN2              | 461.9 | 14.21940928 |
| SFB33_V_5.FIN2  | 276.5 | 1.901960784 | SFB33_C_8.FIN2              | 453.1 | 23.44155844 | SFB21_39.FIN2  | 313.5 | 3.583460949 | SFB21_92.FIN2               | 463.8 | 52.04918033 |
| SFB38_75.FIN2   | 276.9 | 2.818181818 | SFB38_111.FIN2              | 453.1 | 8.397212544 | SFB21_64.FIN2  | 332.0 | 1.023633678 | SFB21_70.FIN2               | 465.2 | 2.4609375   |
| SFB38_13.FIN2   | 277   | 5.210084034 | SFB38_82.FIN2               | 453.4 | 9.937759336 | SFB45_114.FIN2 | 284.2 | 2.38253012  | SFB21_10.FIN2               | 465.9 | 6.660377358 |
| SFB14_V_13.FIN2 | 277.8 | 2.816129032 | SFB33_C_10.FIN2             | 455.4 | 4.587174349 | SFB45_47.FIN2  | 296.0 | 3.609496124 | SFB21_60.FIN2               | 465.9 | 2.452830189 |
| SFB14_V_20.FIN2 | 277.8 | 23.21100917 | SFB33_C_15.FIN2             | 455.9 | 2.607282185 | SFB45_80.FIN2  | 296.6 | 3.421633554 | SFB21_116.FIN2              | 466.1 | 1.61        |
| SFB33_V_17.FIN2 | 278.3 | 2.981199642 | SFB33_C_11.FIN2             | 456.6 | 4.866071429 | SFB45_57.FIN2  | 304.9 | 3.231316726 | SFB21_27.FIN2               | 466.3 | 1.377713459 |
| SFB38_109.FIN2  | 278.3 | 0.936731107 | SFB14_C_15.FIN2             | 456.9 | 1.579349904 | SFB45_74.FIN2  | 304.9 | 1.736654804 | SFB21_88.FIN2               | 466.9 | 3.081395349 |
| SFB38_67.FIN2   | 278.7 | 3.271084337 | SFB33_C_4.FIN2              | 457.4 | 11.0880829  | SFB45_50.FIN2  | 306.1 | 3.294117647 | SFB21_41.FIN2               | 467.8 | 5.166666667 |
| SFB38_99.FIN2   | 279.1 | 2.720481928 | SFB14_C_8.FIN2              | 462.4 | 5.288930582 | SFB45_65.FIN2  | 308.0 | 4.649974451 | SFB21_26.FIN2               | 468.2 | 9.54954955  |
| SFB38_112.FIN2  | 279.2 | 2.22673031  | SFB14_C_12.FIN2             | 462.4 | 6.75        | SFB45_108.FIN2 | 310.8 | 4.799528302 | SFB21_112.FIN2              | 468.8 | 9.858657244 |
| SFB14_V_4.FIN2  | 279.6 | 3.120879121 | SFB33_C_17.FIN2             | 465   | 5.939759036 | SFB45_02.FIN2  | 311.1 | 2.467980296 | SFB21_100.FIN2              | 470.0 | 18.22323462 |
| SFB38_72.FIN2   | 280.5 | 1.837307153 | SFB14_C_3.FIN2              | 465.6 | 11.39583333 | SFB45_111.FIN2 | 312.8 | 3.005154639 | SFB21_36.FIN2               | 470.8 | 6.576576577 |
| SFB38_114.FIN2  | 280.6 | 2.026086957 | SFB38_113.FIN2              | 465.6 | 8.201754386 | SFB45_87.FIN2  | 313.8 | 0.716535433 | SFB21_38.FIN2               | 471.4 | 4.372294372 |
| SFB38_103.FIN2  | 280.7 | 2.776255708 | SFB14_C_6.FIN2              | 465.7 | 6.700201207 | SFB45_81.FIN2  | 314.3 | 2.294617564 | SFB21_119.FIN2              | 475.0 | 19.7804878  |
| SFB38_110.FIN2  | 281.6 | 4.988388295 | SFB38_2.FIN2                | 465.8 | 2.202702703 | SFB45_55.FIN2  | 315.9 | 1.534635879 | SFB21_90.FIN2               | 475.6 | 14.23766816 |
| SFB14_V_3.FIN2  | 281.8 | 3.857777778 | SFB38_93.FIN2               | 465.9 | 8.813559322 | SFB45_09.FIN2  | 323.3 | 1.417445483 | SFB21_110.FIN2              | 477.7 | 5.583756345 |
| SFB38_31.FIN2   | 282.1 | 3.130177515 | SFB14_C_13.FIN2             | 466.1 | 9.945848375 | SFB45_60.FIN2  | 328.1 | 3.018867925 | SFB21_32.FIN2               | 482.4 | 5.723905724 |
| SFB38_87.FIN2   | 282.7 | 5.965463108 | SFB33_C_1.FIN2              | 466.3 | 2.206153846 | SFB45_44.FIN2  | 329.6 | 2.570934256 | SFB21_71.FIN2               | 488.9 | 3.397350993 |
| SFB33_V_18.FIN2 | 283.5 | 2.276450512 | SFB33_C_18.FIN2             | 466.4 | 4.688090737 | SFB45_05.FIN2  | 333.0 | 9.702970297 | SFB21_52.FIN2               | 489.0 | 3.651685393 |
| SFB38_8.FIN2    | 283.5 | 1.149847095 | SFB33_C_7.FIN2              | 468.1 | 13.84615385 | SFB45_45.FIN2  | 333.6 | 1.594202899 | SFB21_33.FIN2               | 490.0 | 2.190860215 |
| SFB38_98.FIN2   | 283.6 | 4.205035971 | SFB38_96.FIN2               | 469.5 | 2.23364486  | SFB45_17.FIN2  | 340.4 | 4.137931034 | SFB21_102.FIN2              | 490.2 | 3.166965889 |
| SFB14_V_8.FIN2  | 284.5 | 2.085714286 | SFB33_C_9.FIN2              | 469.9 | 5.859649123 | SFB45_76.FIN2  | 341.1 | 2.603988604 | SFB21_105.FIN2              | 492.4 | 2.456422018 |
| SFB14_V_14.FIN2 | 284.5 | 3.102941176 | SFB49_2_43.FIN2             | 470.6 | 14.44155844 | SFB45_75.FIN2  | 341.4 | 1.673469388 | SFB21_99.FIN2               | 498.8 | 8.823529412 |
| SFB38_38.FIN2   | 284.6 | 4.463366337 | SFB38_69.FIN2               | 470.8 | 1.682432432 | SFB45_82.FIN2  | 341.7 | 3.03030303  | SFB21_37.FIN2               | 510.2 | 4.704562453 |
| SFB33_V_6.FIN2  | 284.8 | 1.979716024 | SFB33_C_14.FIN2             | 471.6 | 6.042345277 | SFB45_35.FIN2  | 342.1 | 1.007407407 | SFB21_50.FIN2               | 516.0 | 6.451612903 |
| SFB38_33.FIN2   | 285.3 | 2.056737589 | SFB33_C_5.FIN2              | 478.2 | 6.807692308 | SFB45_12.FIN2  | 343.5 | 26.11464968 | SFB21_45.FIN2               | 522.7 | 8.884462151 |
| SFB38_85.FIN2   | 285.4 | 3.861386139 | SFB38_64.FIN2               | 478.3 | 6.236080178 | SFB45_49.FIN2  | 355.0 | 2.014705882 | SFB21_46.FIN2               | 532.0 | 3.628099174 |
| SFB33_V_3.FIN2  | 285.9 | 2.017391304 | SFB14_C_7.FIN2              | 479   | 2.471846044 |                |       |             | SFB21_103.FIN2              | 543.0 | 6.639344262 |
| SFB38_43.FIN2   | 286.6 | 2.812757202 | SFB14_C_11.FIN2             | 480   | 3.110344828 |                |       |             | SFB21_30.FIN2               | 546.0 | 9.760956175 |
| SFB38_86.FIN2   | 286.6 | 2.194594595 | SFB38_102.FIN2              | 481.3 | 4.509090909 |                |       |             | SFB21_07.FIN2               | 547.6 | 10.12195122 |
| SFB33_V_10.FIN2 | 286.7 | 1.771269177 | SFB38_6.FIN2                | 482   | 17.24770642 |                |       |             | SFB21_51.FIN2               | 553.0 | 6.19047619  |
| SFB33_V_13.FIN2 | 287.2 | 2.945736434 | SFB38_7.FIN2                | 482   | 2.829113924 |                |       |             | SFB21_54.FIN2               | 554.4 | 2.846153846 |
| SFB38_71.FIN2   | 287.3 | 2.5         | SFB14_C_20.FIN2             | 489.9 | 4.87962963  |                |       |             | SFB21_107.FIN2              | 562.2 | 1.836419753 |
| SFB38_90.FIN2   | 287.4 | 1.666430092 | SFB33_C_12.FIN2             | 493.6 | 23.67491166 |                |       |             | SFB21_68.FIN2               | 567.4 | 1.637931034 |

SFB38\_116.FIN2 287.8 4.594827586  
SFB38\_66.FIN2 288.3 2.432835821  
SFB14\_V\_11.FIN2 289.1 1.4536862  
SFB38\_74.FIN2 289.1 1.717948718  
SFB38\_22.FIN2 289.6 2.205466541  
SFB38\_92.FIN2 290 2.979683973  
SFB38\_55.FIN2 290.3 1.972093023  
SFB14\_V\_16.FIN2 290.7 1.954022989  
SFB14\_V\_5.FIN2 290.8 3.45106383  
SFB38\_1.FIN2 290.9 2.144104803  
SFB33\_V\_4.FIN2 291.5 1.67721519  
SFB38\_91.FIN2 291.7 1.417142857  
SFB14\_V\_2.FIN2 292 3.680672269  
SFB33\_V\_2.FIN2 292.1 4.52244898  
SFB33\_V\_20.FIN2 292.3 2.561728395  
SFB33\_V\_7.FIN2 292.7 3.211009174  
SFB38\_88.FIN2 292.9 2.468208092  
SFB38\_95.FIN2 293.1 2.676646707  
SFB38\_54.FIN2 293.5 3.418367347  
SFB14\_V\_7.FIN2 294.5 3.05  
SFB14\_V\_20.FIN2 295.1 4.604385129  
SFB38\_48.FIN2 295.1 3.217293655  
SFB33\_V\_9.FIN2 295.5 3.576388889  
SFB38\_83.FIN2 296.7 4.817204301  
SFB38\_118.FIN2 297.4 3.690851735  
SFB33\_V\_19.FIN2 297.8 4.657051282  
SFB14\_V\_18.FIN2 298.3 2.315315315  
SFB14\_C\_5.FIN2 298.4 3.1171875  
SFB38\_47.FIN2 298.4 1.68771527  
SFB14\_V\_12.FIN2 299.2 2.163588391  
SFB38\_100.FIN2 299.3 2.763667671  
SFB49\_2\_41.FIN2 299.8 2.603092784  
SFB33\_V\_16.FIN2 300.3 3.578651685  
SFB33\_V\_1.FIN2 301 2.891304348  
SFB38\_41.FIN2 301.6 2.134920635  
SFB38\_56.FIN2 303.5 2.05834684  
SFB38\_3.FIN2 303.6 2.831479897  
SFB14\_V\_19.FIN2 304.6 3.746223565  
SFB38\_65.FIN2 306.2 2.665056361  
SFB38\_12.FIN2 306.7 1.896551724  
SFB38\_66.FIN2 311.8 4.358422939  
SFB38\_120.FIN2 316 162.3294858  
SFB49\_2\_16.FIN2 318 1.060555088  
SFB38\_52.FIN2 319.1 3.959459459  
SFB38\_6.FIN2 329 98.75  
SFB38\_7.FIN2 329 4.2578125  
SFB49\_2\_7.FIN2 330.4 0.433522727  
SFB38\_4.FIN2 332 4.725347452  
SFB38\_20.FIN2 332.3 2.701680672  
SFB38\_44.FIN2 332.3 2.11143695  
SFB49\_2\_45.FIN2 332.4 2.013157895  
SFB38\_15.FIN2 335.3 2.099371069  
SFB38\_68.FIN2 337.9 2.062162162

SFB38\_35.FIN2 500 3.432989691  
SFB38\_9.FIN2 502.6 2.865621026  
SFB38\_62.FIN2 502.7 6.306451613  
SFB38\_17.FIN2 509.4 6.606606607  
SFB38\_58.FIN2 511 3.503649635  
SFB38\_105.FIN2 513.8 5.8  
SFB38\_77.FIN2 514.6 7.660550459  
SFB38\_23.FIN2 518 6.06284658  
SFB38\_97.FIN2 523.3 8.198757764  
SFB38\_28.FIN2 528.4 16.94267516  
SFB38\_115.FIN2 530.5 2.051136364  
SFB38\_24.FIN2 535.6 7.012448133  
SFB33\_C\_16.FIN2 540.3 2.52742616  
SFB14\_C\_19.FIN2 540.4 2.045045045  
SFB14\_C\_1.FIN2 541.3 12.56345178  
SFB38\_59.FIN2 548.3 1.023890785  
SFB38\_53.FIN2 584.8 2.96039604  
SFB38\_116.FIN2 591.8 0.558649789  
SFB38\_42.FIN2 596 2.190942472  
SFB33\_C\_7.FIN2 597 1.871186441  
SFB38\_64.FIN2 609 1.410714286  
SFB38\_29.FIN2 622 3.793969849  
SFB38\_53.FIN2 628.7 1.770491803  
SFB14\_C\_17.FIN2 629.5 4.6  
SFB49\_2\_43.FIN2 667.8 1.000520833  
SFB14\_C\_18.FIN2 669.6 2.184713376  
SFB38\_117.FIN2 677.1 1.438735178

SFB21\_14.FIN2 572.4 10.2739726  
SFB21\_63.FIN2 595.0 0.749266862  
SFB21\_77.FIN2 596.6 0.520852641  
SFB21\_08.FIN2 603.3 3.227091633  
SFB21\_43.FIN2 603.9 1.990384615  
SFB21\_80.FIN2 612.0 2.464285714  
SFB21\_05.FIN2 626.2 61.23076923  
SFB21\_74.FIN2 659.1 4.068627451  
SFB21\_113.FIN2 659.5 9.159292035  
SFB21\_67.FIN2 670.2 27.22222222  
SFB21\_34.FIN2 692.0 5.786163522  
SFB21\_04.FIN2 701.9 3.291746641  
SFB45\_90.FIN2 398.5 2.378929482  
SFB45\_61.FIN2 400.0 5  
SFB45\_69.FIN2 403.4 3.354655295  
SFB45\_48.FIN2 419.0 0.824675325  
SFB45\_105.FIN2 450.6 14.375  
SFB45\_58.FIN2 451.6 2.359900374  
SFB45\_73.FIN2 454.0 1.102725367  
SFB45\_51.FIN2 456.9 4.291187739  
SFB45\_71.FIN2 459.6 13.80208333  
SFB45\_15.FIN2 467.4 1.663760028  
SFB45\_95.FIN2 468.1 1.765472313  
SFB45\_63.FIN2 481.0 5.611111111  
SFB45\_39.FIN2 492.4 1.841860465  
SFB45\_112.FIN2 495.0 1.148282098  
SFB45\_20.FIN2 499.8 2.592592593  
SFB45\_06.FIN2 500.4 4.227272727  
SFB45\_78.FIN2 502.7 1.186440678  
SFB45\_56.FIN2 525.7 1.550403226  
SFB45\_36.FIN2 532.3 24.87179487  
SFB45\_08.FIN2 532.9 45.98540146  
SFB45\_53.FIN2 542.5 2.696832579  
SFB45\_42.FIN2 542.9 1.331428571  
SFB45\_41.FIN2 551.0 1.635761589  
SFB45\_32.FIN2 552.0 5.3  
SFB45\_117.FIN2 552.3 3.157142857  
SFB45\_110.FIN2 566.5 17.34197731  
SFB45\_23.FIN2 567.1 0.040453074  
SFB45\_98.FIN2 569.3 1.103225806  
SFB45\_24.FIN2 570.9 2.487046632  
SFB45\_66.FIN2 571.0 1.896226415  
SFB45\_62.FIN2 578.0 2.911428571  
SFB45\_93.FIN2 582.6 1.177165354  
SFB45\_89.FIN2 587.0 1.236453202  
SFB45\_25.FIN2 601.0 2.554744526  
SFB45\_37.FIN2 610.6 2.761437908  
SFB45\_22.FIN2 611.1 0.983102919  
SFB45\_30.FIN2 618.0 2.477973568  
SFB45\_13.FIN2 640.6 1.600340136  
SFB45\_77.FIN2 647.0 9.903121636  
SFB45\_27.FIN2 670.7 1.277777778  
SFB45\_115.FIN2 683.4 2.346938776  
SFB45\_40.FIN2 697.3 1.475750577  
SFB45\_59.FIN2 702.0 2.535172414

[illegible]

[illegible]

|               |             |    |      |      |      |      |     |      |    |      |      |      |     |      |       |     |     |       |       |         |       |             |      |        |       |        |        |        |        |         |         |
|---------------|-------------|----|------|------|------|------|-----|------|----|------|------|------|-----|------|-------|-----|-----|-------|-------|---------|-------|-------------|------|--------|-------|--------|--------|--------|--------|---------|---------|
| SFB45_14.FIN2 | 0.000148768 | 34 | 0.06 | 0.72 | 1.34 | 0.41 | 9.8 | 3.76 | 50 | 18.5 | 98.2 | 26.9 | 354 | 44.4 | 21800 | 148 | 170 | 0.00  | 35.53 | 0.44    | 1.01  | 5.80        | 4.71 | 32.03  | 64.83 | 131.23 | 217.39 | 394.38 | 755.62 | 1427.42 | 1165.35 |
|               |             |    |      |      |      |      |     |      |    |      |      |      |     |      |       |     |     | #NUM! | 0.35  | 0.00000 | 10.88 | 36.38759441 | 1.15 | 2708.4 | 6.6   |        |        |        |        |         |         |
